# Supplementary material
Source: publisher figshare collection journal article supplement (https://gsajournals.figshare.com/ndownloader/files/31202179)
Supplement: Supplementary file 1 [file 31202179]

## Sheet: Annotated_DiffBoundSites
seqnames	start	end	width	strand	Conc	Conc_MA	Conc_MC	Fold	p.value	FDR	annotation	geneChr	geneStart	geneEnd	geneLength	geneStrand	geneId	transcriptId	distanceToTSS	ENSEMBL	SYMBOL	GENENAME
chr2	33567105	33567224	120	*	2.02	1.13	2.96	-1.83	0.015	0.05	Intron (NM_001128385/100148828, intron 2 of 5)	2	33477088	33645315	168228	2	100148828	NM_001128385	78091	ENSDARG00000077994	b4galt2	UDP-Gal:betaGlcNAc beta 1,4- galactosyltransferase, polypeptide 2
chr21	31345428	31345608	181	*	2.8	2.22	3.53	-1.32	0.015	0.05	Distal Intergenic	21	31253180	31274479	21300	1	393423	NM_200451	92248	ENSDARG00000033361	asl	argininosuccinate lyase
chr5	52024127	52024379	253	*	3.75	3.05	4.58	-1.53	0.015	0.05	Distal Intergenic	5	52000169	52010144	9976	2	405897	NM_212961	-13983	ENSDARG00000051916	cdk7	cyclin-dependent kinase 7
chr14	11300606	11301089	484	*	3.6	3.15	4.23	-1.08	0.015	0.05	Distal Intergenic	14	11395429	11399574	4146	1	553706	NM_001020678	-94340	ENSDARG00000071871	glod5	glyoxalase domain containing 5
chr20	29937355	29937661	307	*	3.11	2.43	3.93	-1.49	0.015	0.05	Distal Intergenic	20	29836276	29864390	28115	2	437000	NM_001002727	-72965	ENSDARG00000042557	rnf144ab	ring finger protein 144ab
chr16	54217318	54217437	120	*	3.67	2.43	4.77	-2.34	0.015	0.05	Exon (NM_001003988/445480, exon 8 of 18)	16	54209437	54246193	36757	1	445480	NM_001003988	7881	ENSDARG00000009494	xrcc1	X-ray repair complementing defective repair in Chinese hamster cells 1
chr7	41722218	41722409	192	*	2.46	2.86	0.96	1.9	0.015	0.05	Intron (NM_199824/327551, intron 1 of 5)	7	41713921	41726427	12507	2	327551	NM_199824	4018	ENSDARG00000094709	arl8	ADP-ribosylation factor-like 8
chr12	39671097	39671439	343	*	2.65	2.12	3.34	-1.22	0.015	0.05	Distal Intergenic	12	38807645	38854965	47321	1	100151075	NM_001099246	863452	ENSDARG00000074041	abca5	ATP-binding cassette, sub-family A (ABC1), member 5
chr7	65157283	65157773	491	*	4.14	3.52	4.91	-1.39	0.015	0.05	Exon (NM_200905/321739, exon 15 of 25)	7	65121917	65174007	52091	1	321739	NM_200905	35366	ENSDARG00000035751	ipo7	importin 7
chr13	28196766	28197001	236	*	2.67	3.07	1.26	1.81	0.015	0.05	Exon (NM_001077778/777731, exon 4 of 10)	13	28009727	28263856	254130	2	777731	NM_001077778	66855	ENSDARG00000031302	smap1	small ArfGAP 1
chr10	36542364	36542576	213	*	3.35	3.64	2.49	1.15	0.0149	0.0497	Intron (NM_001161447/794108, intron 1 of 46)	10	36475860	36547128	71269	2	794108	NM_001161447	4552	ENSDARG00000061052	nipblb	NIPBL cohesin loading factor b
chr7	73843902	73844048	147	*	3.22	3.55	2.19	1.36	0.0149	0.0497	Promoter (<=1kb)	7	73838558	73843720	5163	2	100329847	NM_001326703	-182	ENSDARG00000079652	caap1	caspase activity and apoptosis inhibitor 1
chr14	11002056	11002260	205	*	3.35	3.63	2.52	1.11	0.0149	0.0497	Distal Intergenic	14	10954359	10974650	20292	1	777734	NM_001077781	47697	ENSDARG00000071872	zdhhc15b	zinc finger DHHC-type containing 15b
chr22	1196511	1196730	220	*	2.63	2.02	3.38	-1.36	0.0149	0.0497	Distal Intergenic	22	1170295	1182158	11864	1	393570	NM_200598	26216	ENSDARG00000101986	irf6	interferon regulatory factor 6
chr3	46948465	46948591	127	*	1.27	0.47	2.15	-1.68	0.0149	0.0497	Distal Intergenic	3	46802998	46817499	14502	2	30732	NM_131449	-130966	ENSDARG00000014420	elavl3	ELAV like neuron-specific RNA binding protein 3
chr11	31264188	31264396	209	*	3.47	2.67	4.36	-1.68	0.0149	0.0497	Exon (NM_001014332/541519, exon 16 of 22)	11	31258140	31276054	17915	2	541519	NM_001014332	11658	ENSDARG00000001897	man2b1	mannosidase, alpha, class 2B, member 1
chr6	7720032	7720172	141	*	3.15	3.48	2.14	1.34	0.0149	0.0497	Promoter (<=1kb)	6	7713343	7720332	6990	2	394027	NM_201052	160	ENSDARG00000019181	rpsa	ribosomal protein SA
chr9	42796259	42796466	208	*	2.85	2.24	3.6	-1.37	0.0149	0.0497	Distal Intergenic	9	42728267	42730615	2349	2	368498	NM_001004506	-65644	ENSDARG00000010962	fkbp7	FKBP prolyl isomerase 7
chr25_KZ114994v1_alt	93253	93373	121	*	0.88	-0.11	1.87	-1.98	0.0149	0.0497	Distal Intergenic	931	113276	122649	9374	2	334669	NM_001167956	29276	ENSDARG00000033596	polr2c	polymerase (RNA) II (DNA directed) polypeptide C
chr14	14746232	14746425	194	*	3.97	4.34	2.7	1.63	0.0149	0.0497	Promoter (<=1kb)	14	14725355	14745660	20306	2	337685	NM_001018107	-572	ENSDARG00000105243	ogt.1	O-linked N-acetylglucosamine (GlcNAc) transferase, tandem duplicate 1
chr1	7554077	7554288	212	*	2.35	1.69	3.14	-1.45	0.0149	0.0497	3' UTR	1	7546345	7554360	8016	1	58143	NM_131619	7732	ENSDARG00000017441	mylz3	myosin, light polypeptide 3, skeletal muscle
chr8	52463642	52464063	422	*	2.42	1.88	3.12	-1.24	0.0149	0.0497	5' UTR	8	52453146	52473054	19909	2	100002455	NM_001327968	8991	ENSDARG00000116497	phyhip	phytanoyl-CoA 2-hydroxylase interacting protein
chr13	24304	24444	141	*	3.08	3.47	1.71	1.76	0.0149	0.0497	Distal Intergenic	13	33876	39254	5379	2	767629	NM_001076571	14810	ENSDARG00000063670	gtf2a1l	general transcription factor IIA, 1-like
chr12	43775505	43775687	183	*	1.53	0.75	2.4	-1.66	0.0149	0.0498	Distal Intergenic	12	43669293	43685798	16506	2	503764	NM_001327869	-89707	ENSDARG00000101200	zgc:112964	zgc:112964
chr1	3258260	3258726	467	*	3.66	4.02	2.44	1.58	0.0149	0.0498	Intron (NM_001302236/559454, intron 2 of 7)	1	3100244	3295045	194802	2	559454	NM_001302236	36319	ENSDARG00000103647	gpc5a	glypican 5a
chr13	24632277	24632613	337	*	4.41	4.71	3.54	1.16	0.0149	0.0498	Distal Intergenic	13	24662238	24664668	2431	1	30526	NM_131272	-29625	ENSDARG00000015674	msx3	muscle segment homeobox 3
chr4	5484359	5484699	341	*	1.77	1.03	2.63	-1.6	0.0149	0.0498	Distal Intergenic	4	5506959	5522437	15479	1	415185	NM_001002095	-22260	ENSDARG00000045836	mapk11	mitogen-activated protein kinase 11
chr16	34315734	34315894	161	*	0.92	0.08	1.83	-1.75	0.0149	0.0498	Distal Intergenic	16	34199304	34285106	85803	2	393643	NM_200670	-30628	ENSDARG00000032221	phactr4b	phosphatase and actin regulator 4b
chr15	28456585	28456910	326	*	4.32	4.6	3.52	1.07	0.0149	0.0498	Distal Intergenic	15	28482973	28538957	55985	1	568981	NM_001030229	-26063	ENSDARG00000014652	ankrd13b	ankyrin repeat domain 13B
chr20	39910470	39910851	382	*	3.85	4.13	3.03	1.1	0.0149	0.0498	Intron (NM_001351706/110438188, intron 3 of 6)	20	39806371	40119872	313502	2	110438188	NM_001351706	209021	ENSDARG00000069427	nkain2	sodium/potassium transporting ATPase interacting 2
chr18	23591665	23592122	458	*	3.57	3.85	2.75	1.11	0.0149	0.0498	Distal Intergenic	18	23868651	23875370	6720	2	30424	NM_131183	283248	ENSDARG00000040926	nr2f2	nuclear receptor subfamily 2, group F, member 2
chr21	26740514	26740927	414	*	3.8	4.09	2.94	1.15	0.0149	0.0498	Intron (NM_001328356/553283, intron 1 of 20)	21	26733345	26966059	232715	1	553283	NM_001328356	7169	ENSDARG00000098766	pcxa	pyruvate carboxylase a
chr2	36962070	36962630	561	*	4.6	4.85	3.93	0.92	0.0149	0.0498	Distal Intergenic	2	36939941	36941987	2047	1	497646	NM_001012386	22129	ENSDARG00000013576	gadd45bb	growth arrest and DNA-damage-inducible, beta b
chr12	31648764	31648873	110	*	0.92	0.05	1.85	-1.79	0.0149	0.0498	Distal Intergenic	12	31616515	31631297	14783	1	337172	NM_212770	32249	ENSDARG00000005185	cpn1	carboxypeptidase N, polypeptide 1
chr7	73587237	73587388	152	*	1.85	1.19	2.64	-1.45	0.0149	0.0498	Distal Intergenic	7	73593900	73616617	22718	1	102997060	NM_001290417	-6512	ENSDARG00000079738	znf219	zinc finger protein 219
chr8	38306266	38306471	206	*	2.12	1.48	2.89	-1.41	0.0149	0.0498	Intron (NM_001326402/560322, intron 1 of 9)	8	38190233	38317802	127570	2	560322	NM_001326402	11331	ENSDARG00000069956	pdlim2	PDZ and LIM domain 2 (mystique)
chr16	45254941	45255224	284	*	1.93	1.23	2.75	-1.52	0.0149	0.0498	Exon (NM_001098187/569259, exon 12 of 13)	16	45248867	45288699	39833	2	569259	NM_001098187	33475	ENSDARG00000027609	hpn	hepsin
chr15	38910278	38910446	169	*	2	1.37	2.77	-1.4	0.0149	0.0498	Intron (NM_131633/60309, intron 2 of 29)	15	38859648	39228226	368579	1	60309	NM_131633	50630	ENSDARG00000014891	robo2	roundabout, axon guidance receptor, homolog 2 (Drosophila)
chr7	66183621	66183749	129	*	4.78	4.45	5.27	-0.81	0.0149	0.0498	Distal Intergenic	7	66136413	66137067	655	2	405885	NM_212949	-46554	ENSDARG00000091961	pth1b	parathyroid hormone 1b
chr4	8610282	8610714	433	*	4.68	4.25	5.27	-1.02	0.0149	0.0498	Exon (NM_001015043/324835, exon 1 of 1)	4	8532174	8665469	133296	1	30105	NM_001362273	78108	ENSDARG00000102464	wnt5b	wingless-type MMTV integration site family, member 5b
chr4	46747608	46747740	133	*	1.24	0.42	2.15	-1.73	0.0149	0.0498	Distal Intergenic	4	47257854	47262290	4437	1	30186	NM_130993	-510114	ENSDARG00000105570	crestin	crestin
chr16	19424311	19424446	136	*	3.45	3.04	4.03	-1	0.0149	0.0498	Distal Intergenic	16	19536614	19538772	2159	1	324931	NM_205550	-112168	ENSDARG00000056666	sp8b	sp8 transcription factor b
chr7	565254	565954	701	*	4.06	4.35	3.18	1.18	0.0149	0.0498	Intron (NM_001079984/560420, intron 9 of 14)	7	427503	624158	196656	1	560420	NM_001079984	137751	NA	nrxn2b	neurexin 2b
chr5	3516296	3516523	228	*	1.9	1.28	2.66	-1.37	0.0149	0.0498	Intron (NM_213022/117604, intron 1 of 1)	5	3501857	3546601	44745	1	117604	NM_213022	14439	ENSDARG00000067626	ywhag1	3-monooxygenase/tryptophan 5-monooxygenase activation protein, gamma polypeptide 1
chr8	20389948	20390131	184	*	2.98	3.34	1.81	1.52	0.0149	0.0498	Distal Intergenic	8	20393295	20414365	21071	1	553615	NM_001020589	-3164	ENSDARG00000015752	zap70	zeta chain of T cell receptor associated protein kinase 70
chr2	43817223	43817343	121	*	2.43	1.71	3.26	-1.55	0.0149	0.0498	Distal Intergenic	2	43749221	43797218	47998	1	563267	NM_001126407	68002	ENSDARG00000008548	arhgap12a	Rho GTPase activating protein 12a
chr22	704759	705195	437	*	4.51	4.81	3.58	1.23	0.0149	0.0498	Distal Intergenic	22	710759	718615	7857	2	567222	NM_001200020	13420	ENSDARG00000078686	arl8a	ADP-ribosylation factor-like 8A
chr8	1327805	1328157	353	*	3.24	3.59	2.09	1.5	0.0149	0.0498	Distal Intergenic	8	1222132	1267182	45051	2	393148	NM_200179	-60623	ENSDARG00000021483	cdc14b	cell division cycle 14B
chr17	1322481	1322809	329	*	3.99	4.35	2.82	1.53	0.0149	0.0498	Promoter (<=1kb)	17	1323699	1355792	32094	1	407989	NM_214820	-890	ENSDARG00000099517	adss1	adenylosuccinate synthase 1
chr24	15699969	15700148	180	*	1.42	0.63	2.3	-1.67	0.0149	0.0498	Distal Intergenic	24	15645459	15648006	2548	2	560583	NM_001098738	-51963	ENSDARG00000077151	cbln2b	cerebellin 2b precursor
chr24	28316049	28316574	526	*	3.82	4.13	2.84	1.29	0.0149	0.0498	Intron (NM_001328430/570761, intron 1 of 13)	24	28252520	28333126	80607	2	570761	NM_001328430	16552	ENSDARG00000012625	prkag2a	protein kinase, AMP-activated, gamma 2 non-catalytic subunit a
chr5	14442990	14443110	121	*	2.9	2.38	3.58	-1.2	0.0149	0.0498	Promoter (<=1kb)	5	14393063	14443124	50062	2	266966	NM_001123312	14	ENSDARG00000018907	kat6a	K(lysine) acetyltransferase 6A
chr7	49767894	49768589	696	*	3.46	2.91	4.17	-1.26	0.0149	0.0498	Distal Intergenic	7	49715769	49717196	1428	1	30478	NM_131231	52125	ENSDARG00000101628	ascl1b	achaete-scute family bHLH transcription factor 1b
chr12	41695964	41696083	120	*	2.68	3.04	1.46	1.58	0.0149	0.0498	Promoter (2-3kb)	12	41698174	41705989	7816	1	336116	NM_001012245	-2091	ENSDARG00000099961	bnip3	BCL2 interacting protein 3
chr17	18586717	18587342	626	*	3.03	2.53	3.69	-1.15	0.0149	0.0498	Distal Intergenic	17	18773966	18797223	23258	2	406694	NM_213385	209881	ENSDARG00000018006	vrk1	VRK serine/threonine kinase 1
chr6	13799446	13799643	198	*	2.87	2.17	3.69	-1.52	0.0149	0.0498	Promoter (<=1kb)	6	13800093	13800172	80	2	100271844	NR_030132	529	ENSDARG00000081499	mir375-1	microRNA 375-1
chr7	28767822	28767941	120	*	2.17	1.59	2.9	-1.31	0.0149	0.0498	Intron (NM_205552/325319, intron 1 of 8)	7	28724919	28837317	112399	1	325319	NM_205552	42903	ENSDARG00000003872	ccdc102a	coiled-coil domain containing 102A
chr18	47113701	47113898	198	*	2.55	2.88	1.51	1.37	0.0149	0.0498	Distal Intergenic	18	47301165	47306847	5683	1	334784	NM_199925	-187267	ENSDARG00000020841	rbm7	RNA binding motif protein 7
chr21	15601101	15601437	337	*	4.75	5.03	3.96	1.07	0.0149	0.0498	Promoter (<=1kb)	21	15601257	15618777	17521	1	30731	NM_131448	0	ENSDARG00000011594	smarcb1b	SWI/SNF related, matrix associated, actin dependent regulator of chromatin, subfamily b, member 1b
chr3	32474479	32474730	252	*	4.88	5.16	4.08	1.08	0.0149	0.0498	Distal Intergenic	3	32492577	32518437	25861	1	100004946	NM_001288815	-17847	ENSDARG00000059993	trpm4a	transient receptor potential cation channel, subfamily M, member 4a
chr25	37466518	37467145	628	*	5.62	5.84	5.04	0.8	0.0149	0.0498	Promoter (1-2kb)	25	37460723	37465064	4342	2	100009632	NM_001083001	-1454	ENSDARG00000110991	zgc:158366	zgc:158366
chr4	1643119	1643238	120	*	2.19	1.45	3.04	-1.59	0.0149	0.0499	Distal Intergenic	4	1648033	1684347	36315	2	566352	NM_001077763	41109	ENSDARG00000007413	arid2	AT rich interactive domain 2 (ARID, RFX-like)
chr12	28307437	28307605	169	*	1.36	0.63	2.21	-1.58	0.0149	0.0499	Distal Intergenic	12	28310647	28349026	38380	2	559344	NM_001130772	41421	ENSDARG00000078481	uts2r2	urotensin-2 receptor 2
chr14	20777865	20778355	491	*	2.33	1.7	3.1	-1.4	0.0149	0.0499	Distal Intergenic	14	20869641	20891746	22106	2	559959	NM_001080068	113391	ENSDARG00000071699	ids	iduronate 2-sulfatase
chr23	7451434	7451729	296	*	2.56	2.94	1.28	1.66	0.0149	0.0499	Distal Intergenic	23	7379800	7391000	11201	1	30482	NM_131235	71634	ENSDARG00000017821	gata5	GATA binding protein 5
chr7	12299878	12300169	292	*	2.61	2.93	1.66	1.26	0.0149	0.0499	Distal Intergenic	7	12371073	12380200	9128	1	641580	NM_001037578	-70904	ENSDARG00000006474	saxo2	stabilizer of axonemal microtubules 2
chr17	38913942	38914062	121	*	1.72	0.89	2.62	-1.73	0.0149	0.0499	Distal Intergenic	17	38784376	38887379	103004	2	550467	NM_001017770	-26563	ENSDARG00000015425	slc24a4a	solute carrier family 24 member 4a
chr10	20400610	20400729	120	*	2.63	1.76	3.55	-1.79	0.0149	0.0499	Distal Intergenic	10	20364388	20372141	7754	1	798622	NM_001105599	36222	ENSDARG00000057676	golga7	golgin A7
chr1	3472008	3472233	226	*	2.55	2.01	3.24	-1.23	0.0149	0.0499	Distal Intergenic	1	3298112	3298249	138	2	100033570	NR_030009	-173759	ENSDARG00000104155	mir17a-1	microRNA 17a-1
chr6	42769228	42769418	191	*	1.87	1.11	2.73	-1.62	0.0149	0.0499	Distal Intergenic	6	42820284	42914459	94176	1	544658	NM_001014822	-50866	ENSDARG00000011163	sema3fa	sema domain, immunoglobulin domain (Ig), short basic domain, secreted, (semaphorin) 3Fa
chr11	13727786	13727912	127	*	2.21	1.65	2.92	-1.27	0.0149	0.0499	Intron (NM_001005206/445819, intron 7 of 9)	11	13642178	13789451	147274	1	445819	NM_001005206	85608	ENSDARG00000041113	wdr18	WD repeat domain 18
chr23	38399686	38400043	358	*	3.16	3.46	2.27	1.19	0.0149	0.0499	Distal Intergenic	23	38245610	38263261	17652	1	100537540	NM_001351640	154076	ENSDARG00000088123	znf217	zinc finger protein 217
chr19	4862113	4862396	284	*	2.82	3.17	1.71	1.45	0.0149	0.0499	Distal Intergenic	19	4912820	4959375	46556	1	100884132	NM_001281923	-50424	ENSDARG00000076280	ppp1r1b	protein phosphatase 1, regulatory (inhibitor) subunit 1B
chr16	1551367	1551729	363	*	2.24	1.65	2.98	-1.33	0.0149	0.0499	Distal Intergenic	16	1470418	1503023	32606	2	260351	NM_178222	-48344	ENSDARG00000023316	sim1a	SIM bHLH transcription factor 1a
chr6	57663268	57663465	198	*	2.1	1.5	2.85	-1.35	0.0149	0.0499	Distal Intergenic	6	57634378	57655030	20653	2	767652	NM_001365483	-8238	ENSDARG00000074337	cbfa2t2	CBFA2/RUNX1 partner transcriptional co-repressor 2
chr9	55522443	55522745	303	*	3.95	3.34	4.71	-1.37	0.0149	0.0499	Distal Intergenic	9	55382408	55418196	35789	1	100147967	NM_001166337	140035	ENSDARG00000077761	nlgn4xb	neuroligin 4 X-linked b
chr12	5807061	5807345	285	*	3.01	3.38	1.72	1.66	0.0149	0.0499	Distal Intergenic	12	5719616	5728729	9114	2	30581	NM_131318	-78332	ENSDARG00000071560	dlx4b	distal-less homeobox 4b
chr2	19653017	19653137	121	*	2.14	1.39	2.99	-1.6	0.0149	0.0499	Distal Intergenic	2	19640963	19649341	8379	1	393729	NM_200756	12054	ENSDARG00000057315	rwdd3	RWD domain containing 3
chr6	54034690	54034895	206	*	2.96	2.28	3.76	-1.48	0.0149	0.0499	Distal Intergenic	6	54060854	54078593	17740	2	664772	NM_001039997	43698	ENSDARG00000059916	hyal1	hyaluronidase 1
chr14	31665078	31665340	263	*	2.54	2.91	1.23	1.68	0.0149	0.0499	Exon (NM_001007287/399646, exon 3 of 6)	14	31657450	31668498	11049	1	399646	NM_001007287	7628	ENSDARG00000071498	fhl1a	four and a half LIM domains 1a
chr11	868481	868811	331	*	3.31	3.62	2.38	1.24	0.0149	0.0499	Distal Intergenic	11	900692	902296	1605	2	735302	NM_001042731	33485	NA	hrh1	histamine receptor H1
chr7	4107219	4107383	165	*	4.57	3.48	5.61	-2.13	0.0149	0.0499	Exon (NM_200993/393968, exon 3 of 9)	7	4088029	4125021	36993	2	393968	NM_200993	17638	ENSDARG00000103845	zgc:55733	zgc:55733
chr14	11084300	11084603	304	*	2.42	1.81	3.18	-1.37	0.0149	0.0499	Distal Intergenic	14	10954359	10974650	20292	1	777734	NM_001077781	129941	ENSDARG00000071872	zdhhc15b	zinc finger DHHC-type containing 15b
chr4	19414786	19414919	134	*	1.28	0.54	2.14	-1.6	0.0149	0.0499	Exon (NM_182865/324404, exon 22 of 24)	4	19396945	19694156	297212	2	324404	NM_182865	279237	ENSDARG00000006766	snd1	staphylococcal nuclease and tudor domain containing 1
chr19	3170263	3170439	177	*	2.31	2.68	1.08	1.6	0.0149	0.0499	Promoter (2-3kb)	19	3137520	3167715	30196	2	386700	NM_198817	-2548	ENSDARG00000035694	stm	starmaker
chr4	18071663	18071763	101	*	1.3	0.52	2.18	-1.66	0.0149	0.0499	Intron (NM_001100017/565408, intron 10 of 25)	4	17888159	18201411	313253	2	565408	NM_001100017	129648	ENSDARG00000003512	anks1b	ankyrin repeat and sterile alpha motif domain containing 1B
chr2	27089470	27089574	105	*	1.07	0.25	1.98	-1.72	0.0149	0.0499	Intron (NM_001077448/567704, intron 10 of 10)	2	27010415	27094745	84331	1	567704	NM_001077448	79055	ENSDARG00000023542	cdh7a	cadherin 7a
chr5	46896380	46896679	300	*	2.04	1.45	2.79	-1.33	0.0149	0.0499	Distal Intergenic	5	46490622	46505702	15081	2	493635	NM_001313730	-390678	ENSDARG00000089769	hapln1a	hyaluronan and proteoglycan link protein 1a
chr19	13206676	13206892	217	*	3.32	3.63	2.41	1.22	0.0149	0.0499	Intron (NM_001039524/568464, intron 5 of 7)	19	13194146	13286738	92593	2	568464	NM_001039524	79846	ENSDARG00000100560	zfpm2b	zinc finger protein, FOG family member 2b
chr11	3595267	3595652	386	*	2.61	2.09	3.29	-1.21	0.0149	0.0499	Distal Intergenic	11	3586051	3593118	7068	1	402979	NM_205679	9216	ENSDARG00000038199	cdab	cytidine deaminase b
chr15	1173313	1173574	262	*	4.24	3.54	5.06	-1.52	0.0149	0.0499	Exon (NM_001079994/561840, exon 7 of 18)	15	1167119	1194750	27632	1	561840	NM_001079994	6194	ENSDARG00000063624	gfm1	G elongation factor, mitochondrial 1
chr6	3218332	3218470	139	*	1.65	0.96	2.47	-1.51	0.0149	0.0499	Exon (NM_001311348/140819, exon 18 of 32)	6	2951645	3273166	321522	1	140819	NM_001311348	266687	ENSDARG00000103479	ptprfa	protein tyrosine phosphatase receptor type Fa
chr3	41475	41595	121	*	2.34	1.54	3.22	-1.68	0.0149	0.0499	Distal Intergenic	3	12976	23780	10805	2	553601	NM_001020577	-17695	ENSDARG00000035221	zgc:110249	zgc:110249
chr16	1155930	1156104	175	*	1.49	0.75	2.33	-1.58	0.0149	0.0499	Distal Intergenic	16	813619	817775	4157	1	403019	NM_207185	342311	ENSDARG00000101831	irx1a	iroquois homeobox 1a
chr3	31395570	31395717	148	*	1.75	2.17	0.17	2	0.0149	0.0499	Distal Intergenic	3	31250066	31254979	4914	2	100002992	NM_001293671	-140591	ENSDARG00000090900	apnl	actinoporin-like protein
chr6	50975599	50975720	122	*	1.89	1.06	2.79	-1.73	0.0149	0.0499	Distal Intergenic	6	50714358	50730749	16392	2	560242	NM_001184955	-244850	ENSDARG00000075530	pigu	phosphatidylinositol glycan anchor biosynthesis, class U
chr3	45758672	45758869	198	*	2.19	1.63	2.9	-1.26	0.0149	0.0499	Promoter (2-3kb)	3	45756605	45770089	13485	1	565271	NM_001128723	2067	ENSDARG00000074661	gper1	G protein-coupled estrogen receptor 1
chr1	4832695	4832814	120	*	2.14	1.53	2.9	-1.37	0.0149	0.0499	Distal Intergenic	1	5275811	5277579	1769	1	335098	NM_001003842	-442997	ENSDARG00000078308	spry2	sprouty RTK signaling antagonist 2
chr5	19153832	19154049	218	*	2.06	1.43	2.84	-1.4	0.0149	0.0499	Distal Intergenic	5	19006701	19014656	7956	2	337046	NM_212766	-139176	ENSDARG00000014817	ranbp1	RAN binding protein 1
chr11	27701130	27701488	359	*	3.96	4.22	3.25	0.98	0.0149	0.0499	Promoter (1-2kb)	11	27646675	27702835	56161	2	503778	NM_001202418	1347	ENSDARG00000018691	phf2	PHD finger protein 2
chr1	38994877	38995029	153	*	1.86	1.25	2.61	-1.36	0.0149	0.0499	Distal Intergenic	1	38850836	38908197	57362	2	403049	NM_205734	-86680	ENSDARG00000069640	vegfc	vascular endothelial growth factor c
chr20	2095788	2096138	351	*	2.39	1.82	3.11	-1.29	0.0149	0.05	Distal Intergenic	20	2127479	2177856	50378	1	403075	NM_001245964	-31341	ENSDARG00000025983	l3mbtl3	L3MBTL histone methyl-lysine binding protein 3
chr6	13375637	13376031	395	*	4.56	4.8	3.93	0.87	0.0149	0.05	Promoter (<=1kb)	6	13371237	13376060	4824	2	100037347	NM_001089501	29	ENSDARG00000071013	arl6ip6	ADP-ribosylation factor-like 6 interacting protein 6
chr20	52043402	52043522	121	*	1.88	1.19	2.7	-1.51	0.0149	0.05	Distal Intergenic	20	52195525	52199296	3772	2	327096	NM_212701	155774	ENSDARG00000009134	hlx1	H2.0-like homeo box 1 (Drosophila)
chr23	45375752	45375913	162	*	1.7	2.11	0.09	2.02	0.0149	0.05	Intron (NM_001003641/445247, intron 5 of 5)	23	45304828	45398622	93795	2	445247	NM_001003641	22709	ENSDARG00000036897	sgms2b	sphingomyelin synthase 2b
chr20	51353130	51353437	308	*	2.46	1.8	3.24	-1.44	0.0149	0.05	Distal Intergenic	20	51363688	51386511	22824	2	404050	NM_205553	33074	ENSDARG00000044949	rnf8	ring finger protein 8, E3 ubiquitin protein ligase
chr7_KZ115233v1_alt	187591	187765	175	*	2.81	3.15	1.7	1.45	0.0149	0.05	Distal Intergenic	336	158062	158140	79	2	100033721	NR_030243	-29451	ENSDARG00000083498	mir184-2	microRNA 184-2
chr21	20696859	20697083	225	*	3.47	3.77	2.58	1.19	0.0149	0.05	Distal Intergenic	21	20715040	20716561	1522	1	406507	NM_213226	-17957	ENSDARG00000016725	gadd45gb.1	growth arrest and DNA-damage-inducible, gamma b, tandem duplicate 1
chr14	32035269	32035424	156	*	1.84	1.05	2.73	-1.68	0.0148	0.0495	Distal Intergenic	14	32022272	32025978	3707	1	415097	NM_001001837	12997	ENSDARG00000071496	zic6	zic family member 6
chr1	10083992	10084441	450	*	2.7	2.18	3.38	-1.2	0.0148	0.0495	Distal Intergenic	1	10066100	10071522	5423	2	378986	NM_001194989	-12470	ENSDARG00000020741	fga	fibrinogen alpha chain
chr17	52684166	52684517	352	*	2.86	2.35	3.53	-1.18	0.0148	0.0495	Distal Intergenic	17	52639492	52658733	19242	2	406513	NM_213232	-25433	ENSDARG00000041449	spred1	sprouty related EVH1 domain containing 1
chr15	38375376	38375638	263	*	2.17	1.49	2.98	-1.49	0.0148	0.0495	Distal Intergenic	15	38221196	38296251	75056	1	556360	NM_001044799	154180	ENSDARG00000060723	stim1a	stromal interaction molecule 1a
chr19	33660147	33660509	363	*	3.51	3.92	2.01	1.91	0.0148	0.0495	Distal Intergenic	19	33701558	33782829	81272	1	767809	NM_001076776	-41049	ENSDARG00000003680	runx1t1	RUNX1 partner transcriptional co-repressor 1
chr5	72226915	72227120	206	*	1.73	1.04	2.54	-1.49	0.0148	0.0495	Distal Intergenic	5	72194489	72205843	11355	1	286777	NM_173268	32426	ENSDARG00000105286	ddx54	DEAD (Asp-Glu-Ala-Asp) box polypeptide 54
chr23_KZ115682v1_alt	257995	258150	156	*	2.24	1.6	3.01	-1.41	0.0148	0.0495	Distal Intergenic	884	180180	191286	11107	1	445083	NM_001003477	77815	ENSDARG00000044982	dhrs3a	dehydrogenase/reductase (SDR family) member 3a
chr16	40622411	40622776	366	*	2.08	1.51	2.8	-1.29	0.0148	0.0495	Distal Intergenic	16	40575742	40585780	10039	1	415165	NM_001002075	46669	ENSDARG00000098529	ccne2	cyclin E2
chr12	5867189	5867563	375	*	2.35	1.81	3.06	-1.25	0.0148	0.0495	Distal Intergenic	12	5981333	5998864	17532	2	323181	NM_212635	131301	ENSDARG00000031770	kat7b	K(lysine) acetyltransferase 7b
chr25	31932696	31932962	267	*	2.59	2.02	3.31	-1.29	0.0148	0.0495	Distal Intergenic	25	31900825	31907668	6844	2	394189	NM_201214	-25028	ENSDARG00000012603	eif3ja	eukaryotic translation initiation factor 3, subunit Ja
chr12	31164100	31164313	214	*	1.85	2.27	0.27	2	0.0148	0.0495	Intron (NM_001313750/567385, intron 7 of 7)	12	31158690	31422534	263845	2	567385	NM_001313750	258221	ENSDARG00000045065	vti1a	vesicle transport through interaction with t-SNAREs 1A
chr18	34084669	34084871	203	*	3.38	2.55	4.29	-1.74	0.0148	0.0495	Distal Intergenic	18	34146007	34156765	10759	2	565816	NM_001144796	71894	ENSDARG00000040582	c18h3orf33	c18h3orf33 homolog (H. sapiens)
chr19	48241261	48241511	251	*	2.76	2.23	3.45	-1.21	0.0148	0.0495	Intron (NM_200422/393394, intron 2 of 9)	19	48004543	48412618	408076	2	393394	NM_200422	171107	ENSDARG00000102591	btr30	bloodthirsty-related gene family, member 30
chr8	50725798	50726113	316	*	5.1	5.4	4.19	1.21	0.0148	0.0495	Promoter (1-2kb)	8	50727220	50733505	6286	1	436920	NM_001002647	-1107	ENSDARG00000089156	egr3	early growth response 3
chr18	30728961	30729239	279	*	2.93	3.27	1.86	1.41	0.0148	0.0495	Distal Intergenic	18	30847237	30851101	3865	1	566407	NM_001080186	-117998	ENSDARG00000015399	foxf1	forkhead box F1
chr6	9692052	9692345	294	*	2.92	3.24	1.96	1.28	0.0148	0.0495	Distal Intergenic	6	9677450	9688511	11062	1	406438	NM_213159	14602	ENSDARG00000044267	sumo1	small ubiquitin like modifier 1
chr16	32339903	32340029	127	*	1.7	1.09	2.46	-1.37	0.0148	0.0495	Distal Intergenic	16	32281505	32303836	22332	2	563411	NM_001130601	-36067	ENSDARG00000074691	mms22l	MMS22-like, DNA repair protein
chr16	50078896	50079126	231	*	2.73	3.07	1.65	1.41	0.0148	0.0495	Distal Intergenic	16	50089417	50111057	21641	1	402815	NM_001130592	-10291	ENSDARG00000003820	nr1d2a	nuclear receptor subfamily 1, group D, member 2a
chr8	33659841	33659961	121	*	1.71	0.88	2.62	-1.74	0.0148	0.0495	Distal Intergenic	8	33420677	33568964	148288	2	100004330	NM_001136477	-90877	ENSDARG00000079478	mvb12bb	multivesicular body subunit 12Bb
chr4	5733773	5733969	197	*	1.69	0.86	2.6	-1.73	0.0148	0.0495	Distal Intergenic	4	5741795	5744465	2671	1	30547	NM_131289	-7826	ENSDARG00000070220	pou3f2a	POU class 3 homeobox 2a
chr14	28266114	28266355	242	*	2.45	1.95	3.13	-1.18	0.0148	0.0495	Distal Intergenic	14	28426613	28432699	6087	2	548344	NM_001017548	166344	ENSDARG00000037174	nek12	NIMA-related kinase 12
chr18	35429560	35430050	491	*	3.45	2.95	4.11	-1.16	0.0148	0.0495	3' UTR	18	35429333	35460496	31164	2	322720	NM_001305471	30446	ENSDARG00000067741	itpkcb	inositol-trisphosphate 3-kinase Cb
chr19	267769	268007	239	*	4.94	4.26	5.75	-1.49	0.0148	0.0495	Distal Intergenic	19	295247	297103	1857	2	100005227	NM_001082978	29096	ENSDARG00000094908	lingo4a	leucine rich repeat and Ig domain containing 4a
chr5	8427651	8427868	218	*	3.01	2.39	3.77	-1.38	0.0148	0.0495	Exon (NM_001014306/541493, exon 13 of 18)	5	8417184	8483537	66354	2	541493	NM_001014306	55669	ENSDARG00000098857	lifra	LIF receptor subunit alpha a
chr4	17369378	17369546	169	*	3.31	2.86	3.93	-1.07	0.0148	0.0495	Exon (NM_001002619/436892, exon 8 of 11)	4	17327710	17370410	42701	1	436892	NM_001002619	41668	ENSDARG00000094191	nup37	nucleoporin 37
chr11	29368102	29368228	127	*	2.53	1.94	3.27	-1.32	0.0148	0.0495	Distal Intergenic	11	29570401	29571765	1365	1	100141343	NM_001114908	-202173	NA	zgc:171818	zgc:171818
chr11	1767305	1767895	591	*	3.88	3.45	4.48	-1.03	0.0148	0.0495	Distal Intergenic	11	1945055	1956203	11149	2	571948	NM_001285533	188308	ENSDARG00000059370	nr1d4b	nuclear receptor subfamily 1, group D, member 4b
chr16	41115983	41116190	208	*	2.26	1.65	3.02	-1.38	0.0148	0.0495	Exon (NM_001202507/100007322, exon 18 of 23)	16	41112346	41131578	19233	2	100007322	NM_001202507	15388	ENSDARG00000070124	ptpn23a	protein tyrosine phosphatase, non-receptor type 23, a
chr15	6545075	6545195	121	*	3.21	2.4	4.11	-1.71	0.0148	0.0495	Distal Intergenic	15	6459847	6493616	33770	1	449818	NM_001005991	85228	ENSDARG00000044781	bace2	beta-secretase 2
chr1	27190677	27190842	166	*	1.95	2.31	0.71	1.6	0.0148	0.0495	Intron (NM_001327751/559327, intron 4 of 5)	1	27024068	27209699	185632	1	559327	NM_001327751	166609	ENSDARG00000069989	bnc2	basonuclin 2
chr7	8904085	8904204	120	*	1.72	0.73	2.71	-1.97	0.0148	0.0495	Distal Intergenic	7	8844368	8881422	37055	2	373869	NM_194409	-22663	ENSDARG00000058702	vax2	ventral anterior homeobox 2
chr15	30127740	30127911	172	*	3.33	3.64	2.34	1.31	0.0148	0.0495	Distal Intergenic	15	30157602	30301526	143925	1	563460	NM_001113485	-29691	ENSDARG00000028793	nlk2	nemo-like kinase, type 2
chr7	10744179	10744298	120	*	1.7	1.03	2.51	-1.48	0.0148	0.0495	Intron (NM_131674/64277, intron 6 of 19)	7	10701938	10873289	171352	1	64277	NM_131674	42241	ENSDARG00000103697	arnt2	aryl-hydrocarbon receptor nuclear translocator 2
chr3	16129374	16129541	168	*	0.82	-0.06	1.76	-1.82	0.0148	0.0495	Distal Intergenic	3	16134376	16141895	7520	2	393819	NM_200846	12354	ENSDARG00000035719	arl5c	ADP-ribosylation factor-like 5C
chr20	35396755	35396880	126	*	2.69	2.17	3.37	-1.2	0.0148	0.0496	Intron (NM_001007366/492494, intron 2 of 3)	20	35382391	35429737	47347	1	492494	NM_001007366	14364	ENSDARG00000023228	vsnl1a	visinin-like 1a
chr12	48779384	48779535	152	*	2.2	2.59	0.79	1.8	0.0148	0.0496	Distal Intergenic	12	48803071	48811125	8055	1	641328	NM_001037122	-23536	ENSDARG00000052842	ppifb	peptidylprolyl isomerase Fb
chr5	55069479	55069627	149	*	1.71	1.02	2.52	-1.5	0.0148	0.0496	Distal Intergenic	5	54938630	54940978	2349	1	101885327	NM_001310490	130849	ENSDARG00000093750	cd180	CD180 molecule
chr15	42980742	42981109	368	*	2.35	1.76	3.1	-1.34	0.0148	0.0496	3' UTR	15	42767803	42981467	213665	1	567212	NM_001123284	212939	ENSDARG00000100592	slc8a2b	solute carrier family 8 member 2b
chr22	2692870	2693112	243	*	2.42	1.85	3.15	-1.31	0.0148	0.0496	Intron (NM_001114420/560662, intron 3 of 4)	22	2472470	2744716	272247	1	560662	NM_001114420	220400	NA	znf1173	zinc finger protein 1173
chr16	49216478	49216736	259	*	2.04	1.33	2.87	-1.54	0.0148	0.0496	Distal Intergenic	16	49601776	49618307	16532	1	797793	NM_001326616	-385040	ENSDARG00000101526	si:dkey-82o10.4	si:dkey-82o10.4
chr21	24215720	24215892	173	*	2.59	1.75	3.5	-1.75	0.0148	0.0496	Intron (NM_001113551/569931, intron 1 of 11)	21	23953179	24412427	459249	1	569931	NM_001113551	262541	ENSDARG00000031075	cadm1a	cell adhesion molecule 1a
chr17	50992892	50993245	354	*	3.11	3.44	2.05	1.39	0.0148	0.0496	Distal Intergenic	17	51020024	51121771	101748	2	393436	NM_200464	128526	ENSDARG00000016775	aqr	aquarius intron-binding spliceosomal factor
chr17	24566884	24567035	152	*	1.88	2.27	0.5	1.78	0.0148	0.0496	Distal Intergenic	17	24604404	24612296	7893	1	334380	NM_199892	-37369	ENSDARG00000044090	zmpste24	zinc metallopeptidase, STE24 homolog
chr13	30599511	30599782	272	*	1.97	2.37	0.54	1.83	0.0148	0.0496	Intron (NM_001098388/562028, intron 2 of 3)	13	30579261	30645965	66705	2	562028	NM_001098388	46183	ENSDARG00000078026	zcchc24	zinc finger, CCHC domain containing 24
chr3	34582471	34582907	437	*	4.3	4.63	3.23	1.4	0.0148	0.0496	Distal Intergenic	3	34587988	34592882	4895	2	100142635	NM_001122613	9975	ENSDARG00000079353	si:ch211-165d12.4	si:ch211-165d12.4
chr18_KZ115548v1_alt	36856	37000	145	*	1.14	1.57	-0.66	2.23	0.0148	0.0496	Distal Intergenic	730	100683	107550	6868	2	557187	NM_001075112	70550	ENSDARG00000063414	rxylt1	ribitol xylosyltransferase 1
chr21	38850070	38850313	244	*	2.16	1.47	2.97	-1.5	0.0148	0.0496	Exon (NM_001128675/403135, exon 2 of 2)	21	38849851	38853737	3887	2	403135	NM_001128675	3424	ENSDARG00000104045	tlr22	toll-like receptor 22
chr2	20949217	20949539	323	*	4.12	3.53	4.85	-1.32	0.0148	0.0496	Exon (NM_131295/30554, exon 14 of 18)	2	20925899	20957362	31464	1	30554	NM_131295	23318	ENSDARG00000024546	pla2g4aa	phospholipase A2, group IVAa (cytosolic, calcium-dependent)
chr14	15079170	15079436	267	*	2.02	1.33	2.84	-1.51	0.0148	0.0496	Intron (NM_001346152/402864, intron 12 of 13)	14	15070796	15155384	84589	2	402864	NM_001346152	75948	ENSDARG00000100916	uvssa	UV-stimulated scaffold protein A
chr17	51775881	51776335	455	*	3.17	2.66	3.84	-1.18	0.0148	0.0496	Distal Intergenic	17	51743921	51757548	13628	1	114426	NM_131801	31960	ENSDARG00000007377	odc1	ornithine decarboxylase 1
chr13	32915228	32915582	355	*	3.39	3.76	2.13	1.63	0.0148	0.0496	Distal Intergenic	13	32901359	32906306	4948	2	568411	NM_001327781	-8922	ENSDARG00000078140	si:dkey-18j18.3	si:dkey-18j18.3
chr16	29120302	29120791	490	*	2.99	2.35	3.77	-1.42	0.0148	0.0496	Exon (NM_131317/30580, exon 3 of 10)	16	29076241	29146624	70384	2	30580	NM_131317	25833	ENSDARG00000040237	mef2d	myocyte enhancer factor 2d
chr23	8095981	8096122	142	*	2.88	2.35	3.57	-1.22	0.0148	0.0496	Distal Intergenic	23	8197296	8198315	1020	1	571123	NM_001030258	-101174	NA	npbwr2b	neuropeptides B/W receptor 2b
chr23	45566970	45567123	154	*	3.82	3.04	4.7	-1.66	0.0148	0.0496	Promoter (1-2kb)	23	45560534	45568816	8283	2	796487	NM_001105670	1693	ENSDARG00000053966	cyp17a2	cytochrome P450, family 17, subfamily A, polypeptide 2
chr24	1237775	1237949	175	*	1.57	0.78	2.45	-1.67	0.0148	0.0496	Intron (NM_001040326/353246, intron 3 of 16)	24	1162325	1303935	141611	2	353246	NM_001040326	65986	ENSDARG00000102153	nrp1a	neuropilin 1a
chr6	9908599	9908792	194	*	2.98	2.31	3.77	-1.46	0.0148	0.0496	Exon (NM_001004636/447898, exon 9 of 14)	6	9898683	9916534	17852	1	447898	NM_001004636	9916	ENSDARG00000074248	tmem237b	transmembrane protein 237b
chr12	28370072	28370481	410	*	2.67	2.11	3.38	-1.28	0.0148	0.0496	Promoter (2-3kb)	12	28367584	28374043	6460	1	436788	NM_001002515	2488	ENSDARG00000045087	cdk5r1b	cyclin-dependent kinase 5, regulatory subunit 1b (p35)
chr18	46645258	46645504	247	*	2.3	2.71	0.8	1.91	0.0148	0.0496	Intron (NM_001013504/541377, intron 2 of 2)	18	46634371	46684349	49979	2	541377	NM_001013504	38845	ENSDARG00000098984	pid1	phosphotyrosine interaction domain containing 1
chr6	35985440	35985736	297	*	3.58	3.94	2.34	1.6	0.0148	0.0496	Distal Intergenic	6	36130717	36178638	47922	2	100001603	NM_001309829	192902	ENSDARG00000061051	brinp3a.2	bone morphogenetic protein/retinoic acid inducible neural-specific 3a, tandem duplicate 2
chr20	5985650	5986188	539	*	3.01	2.45	3.72	-1.27	0.0148	0.0496	Promoter (<=1kb)	20	5985636	6009415	23780	1	100037385	NM_001089536	14	ENSDARG00000103771	cep128	centrosomal protein 128
chr1	37391550	37392159	610	*	2.93	2.3	3.71	-1.41	0.0148	0.0496	Promoter (<=1kb)	1	37391176	37417841	26666	1	567331	NM_001130605	374	ENSDARG00000074989	sparcl1	SPARC-like 1
chr7	47071161	47071374	214	*	2.62	2.95	1.54	1.41	0.0148	0.0496	Distal Intergenic	7	46729419	46781302	51884	2	565811	NM_001195407	-289859	ENSDARG00000103361	tshz3b	teashirt zinc finger homeobox 3b
chr3	18455728	18455862	135	*	3.27	2.8	3.9	-1.11	0.0148	0.0496	Intron (NM_001006076/450056, intron 3 of 11)	3	18437474	18498863	61390	1	450056	NM_001006076	18254	ENSDARG00000036994	tbc1d16	TBC1 domain family, member 16
chr2	10276602	10276731	130	*	3.14	3.43	2.3	1.13	0.0148	0.0496	Distal Intergenic	2	10280667	10284572	3906	1	393548	NM_200576	-3936	ENSDARG00000043581	gadd45aa	growth arrest and DNA-damage-inducible, alpha, a
chr6	2362015	2362281	267	*	3.14	3.49	1.99	1.5	0.0148	0.0496	Intron (NM_001083853/570960, intron 2 of 8)	6	2271432	2394808	123377	1	570960	NM_001083853	90583	ENSDARG00000101131	pbx1b	pre-B-cell leukemia homeobox 1b
chr24	5877598	5877906	309	*	3.55	4.02	1.38	2.65	0.0148	0.0496	Intron (NM_200460/393432, intron 7 of 8)	24	5871589	5889763	18175	2	393432	NM_200460	11857	ENSDARG00000055575	pcolce2b	procollagen C-endopeptidase enhancer 2b
chr16	40236915	40237247	333	*	1.84	1.19	2.63	-1.44	0.0148	0.0496	Distal Intergenic	16	40301073	40339027	37955	1	100007702	NM_001017358	-63826	ENSDARG00000070081	rspo3	R-spondin 3
chr18	23038625	23038967	343	*	3.95	4.27	3	1.27	0.0148	0.0496	Intron (NM_199209/30744, intron 3 of 5)	18	22994113	23071310	77198	1	30744	NM_199209	44512	ENSDARG00000040917	cbfb	core-binding factor subunit beta
chr17	49999041	49999263	223	*	2.72	2.21	3.39	-1.18	0.0148	0.0496	3' UTR	17	49998174	50010167	11994	2	337397	NM_212776	10904	ENSDARG00000030236	tmem30aa	transmembrane protein 30Aa
chr16	54639319	54639461	143	*	1.95	1.3	2.74	-1.44	0.0148	0.0496	Exon (NM_001077321/768178, exon 3 of 16)	16	54513267	55251394	738128	1	393533	NM_200561	126052	ENSDARG00000104874	fzd6	frizzled class receptor 6
chr9	21268519	21268656	138	*	0.67	-0.32	1.67	-1.99	0.0148	0.0496	Promoter (<=1kb)	9	21266684	21268601	1918	2	393693	NM_200720	0	ENSDARG00000057854	sap18	Sin3A-associated protein
chr7	24790941	24791222	282	*	3.14	3.49	2.03	1.46	0.0148	0.0496	Distal Intergenic	7	24815812	24828869	13058	2	436773	NM_001002500	37647	ENSDARG00000011462	otub1b	OTU deubiquitinase, ubiquitin aldehyde binding 1b
chr1	24069448	24069822	375	*	2.35	1.65	3.18	-1.53	0.0148	0.0496	Distal Intergenic	1	24076286	24078098	1813	1	117234	NM_152975	-6464	ENSDARG00000015266	mab21l2	mab-21-like 2
chr13	10393614	10393735	122	*	1.8	1.07	2.64	-1.57	0.0148	0.0496	Distal Intergenic	13	10258009	10261383	3375	2	30635	NM_131362	-132231	ENSDARG00000058008	six3a	SIX homeobox 3a
chr4	16580423	16580568	146	*	1.23	0.46	2.09	-1.63	0.0148	0.0496	Distal Intergenic	4	16538306	16545048	6743	2	114432	NM_200020	-35375	ENSDARG00000027249	btg1	B-cell translocation gene 1, anti-proliferative
chr11	24076806	24077021	216	*	3.69	4.05	2.45	1.6	0.0148	0.0496	Distal Intergenic	11	24058530	24063196	4667	2	405805	NM_212869	-13610	ENSDARG00000016200	trib3	tribbles pseudokinase 3
chr9	31963143	31963262	120	*	1.24	0.38	2.16	-1.78	0.0148	0.0496	Distal Intergenic	9	31838044	31915423	77380	2	497642	NM_001012382	-47720	ENSDARG00000040982	fgf14	fibroblast growth factor 14
chr1	25315679	25315884	206	*	2.07	1.52	2.77	-1.25	0.0148	0.0496	Distal Intergenic	1	25322445	25370281	47837	2	100003782	NM_001014371	54397	ENSDARG00000031817	trim2a	tripartite motif containing 2a
chr9	38194552	38194959	408	*	4.1	4.4	3.24	1.15	0.0148	0.0496	Intron (NM_001115139/562077, intron 1 of 38)	9	38168012	38291456	123445	1	562077	NM_001115139	26540	ENSDARG00000010280	clasp1a	cytoplasmic linker associated protein 1a
chr14	49604365	49605018	654	*	4.84	5.1	4.12	0.98	0.0148	0.0496	Distal Intergenic	14	49683767	49761976	78210	1	324950	NM_001123045	-78749	ENSDARG00000114067	tspan17	tetraspanin 17
chr16	45478787	45479095	309	*	2.18	1.5	2.98	-1.48	0.0148	0.0496	Intron (NM_001326467/100151149, intron 1 of 20)	16	45456066	45689083	233018	1	100151149	NM_001326467	22721	ENSDARG00000069765	syngap1b	synaptic Ras GTPase activating protein 1b
chr19	47096157	47096403	247	*	3.23	3.55	2.21	1.34	0.0148	0.0496	Distal Intergenic	19	46812760	46957887	145128	2	114407	NM_131813	-138270	ENSDARG00000030364	angpt1	angiopoietin 1
chr17	29957973	29958330	358	*	2.1	1.43	2.9	-1.47	0.0148	0.0497	Distal Intergenic	17	29798216	29877336	79121	2	405890	NM_212954	-80637	ENSDARG00000004861	esrrga	estrogen-related receptor gamma a
chr6	32536809	32537029	221	*	1.74	1.06	2.54	-1.48	0.0148	0.0497	Distal Intergenic	6	32404680	32411671	6992	2	322007	NM_199579	-125138	ENSDARG00000056414	usp1	ubiquitin specific peptidase 1
chr12	26117591	26117865	275	*	2.05	1.42	2.82	-1.41	0.0148	0.0497	Intron (NM_001258224/100884131, intron 3 of 10)	12	26084882	26153101	68220	2	100884131	NM_001258224	35236	ENSDARG00000053929	opn4b	opsin 4b
chr11	39877432	39877784	353	*	2.88	2.35	3.58	-1.23	0.0148	0.0497	Distal Intergenic	11	39928823	39954617	25795	1	415163	NM_001002073	-51039	ENSDARG00000070161	vamp3	vesicle-associated membrane protein 3 (cellubrevin)
chr1	44362987	44363105	119	*	1.77	1.08	2.58	-1.51	0.0148	0.0497	Distal Intergenic	1	44390456	44395246	4791	1	436951	NM_001002678	-27351	ENSDARG00000069116	timm10	translocase of inner mitochondrial membrane 10 homolog (yeast)
chr3	10011444	10011810	367	*	2.21	1.61	2.97	-1.36	0.0148	0.0497	Distal Intergenic	3	10152133	10164754	12622	1	327291	NM_194373	-140323	ENSDARG00000044938	cbx2	chromobox homolog 2 (Drosophila Pc class)
chr2	7421155	7421311	157	*	1.43	0.66	2.31	-1.65	0.0148	0.0497	Downstream (2-3kb)	2	7424040	7431286	7247	2	796595	NM_001271291	9975	ENSDARG00000114760	asip2b	agouti signaling protein, nonagouti homolog (mouse) 2b
chr2	34935514	34935653	140	*	1.52	0.85	2.32	-1.48	0.0148	0.0497	Distal Intergenic	2	35116627	35137217	20591	1	100037391	NM_001089542	-180974	ENSDARG00000079329	cop1	COP1 E3 ubiquitin ligase
chr16	39855757	39856027	271	*	2.27	1.63	3.06	-1.43	0.0148	0.0497	Intron (NM_001076716/767747, intron 2 of 13)	16	39643268	39859119	215852	2	767747	NM_001076716	3092	ENSDARG00000044574	rbms3	RNA binding motif, single stranded interacting protein
chr2	22589322	22589605	284	*	3.86	3.32	4.56	-1.25	0.0148	0.0497	Promoter (2-3kb)	2	22592139	22615366	23228	1	323457	NM_001301360	-2534	ENSDARG00000027590	2021-09-02	septin 2
chr24	24844310	24844863	554	*	7.88	7.68	8.21	-0.53	0.0148	0.0497	Intron (NM_001039982/664753, intron 7 of 7)	24	24831727	24846603	14877	1	664753	NM_001039982	12583	ENSDARG00000058158	trim55b	tripartite motif containing 55b
chr7	52567304	52567506	203	*	2.98	3.34	1.76	1.58	0.0148	0.0497	Distal Intergenic	7	52516711	52558478	41768	2	407985	NM_214816	-8826	ENSDARG00000004714	tcf12	transcription factor 12
chr24	41565104	41565298	195	*	4.51	4.12	5.08	-0.96	0.0148	0.0497	Intron (NM_001018133/386769, intron 2 of 9)	24	41516339	41656851	140513	2	386769	NM_001018133	91553	NA	ptprma	protein tyrosine phosphatase receptor type Ma
chr13	43915879	43915998	120	*	2.55	1.69	3.47	-1.78	0.0148	0.0497	Distal Intergenic	13	43639881	43659541	19661	1	100004144	NM_001160346	275998	ENSDARG00000027887	zfyve21	zinc finger, FYVE domain containing 21
chr21	21408420	21408634	215	*	2.4	1.77	3.17	-1.4	0.0148	0.0497	Distal Intergenic	21	21374290	21386120	11831	1	562639	NM_001029959	34130	ENSDARG00000057027	rtn2b	reticulon 2b
chr9_KZ115297v1_alt	156046	156227	182	*	1.94	2.31	0.66	1.65	0.0148	0.0497	Distal Intergenic	416	164615	173809	9195	2	324134	NM_213511	17582	ENSDARG00000021433	asmtl	acetylserotonin O-methyltransferase-like
chr11	31671699	31671898	200	*	1.68	1.02	2.47	-1.45	0.0148	0.0497	Distal Intergenic	11	31680557	31825884	145328	1	445230	NM_001003624	-8659	ENSDARG00000090785	diaph3	diaphanous-related formin 3
chr25	12063335	12063896	562	*	4.33	4.66	3.29	1.38	0.0148	0.0497	Intron (NM_001256664/568668, intron 4 of 17)	25	11805540	12220373	414834	2	568668	NM_001256664	156477	ENSDARG00000077228	ntrk3a	neurotrophic tyrosine kinase, receptor, type 3a
chr5	17246714	17247004	291	*	2.58	2.08	3.26	-1.18	0.0148	0.0497	Distal Intergenic	5	16718919	16734062	15144	2	368672	NM_001004640	-512652	ENSDARG00000023267	atad1a	ATPase family AAA domain containing 1a
chr12	25698571	25698816	246	*	2.07	1.39	2.87	-1.48	0.0148	0.0497	Distal Intergenic	12	25610224	25612007	1784	2	566454	NM_001128734	-86564	ENSDARG00000054878	six2b	SIX homeobox 2b
chr15	17995580	17996302	723	*	5.18	5.51	4.15	1.36	0.0148	0.0497	Distal Intergenic	15	18102280	18115536	13257	2	399661	NM_201993	119234	ENSDARG00000031214	arcn1b	archain 1b
chr10	5921086	5921252	167	*	2.82	3.17	1.67	1.49	0.0148	0.0497	Distal Intergenic	10	6013073	6034410	21338	1	394060	NM_201085	-91821	ENSDARG00000103025	hmgcs1	3-hydroxy-3-methylglutaryl-CoA synthase 1 (soluble)
chr2	22311890	22312086	197	*	4.75	5.02	3.99	1.03	0.0148	0.0497	Distal Intergenic	2	22208404	22286828	78425	2	573995	NM_001025174	-25062	ENSDARG00000088073	fam110b	family with sequence similarity 110 member B
chr12	42930903	42931200	298	*	2.42	1.68	3.27	-1.59	0.0148	0.0497	Distal Intergenic	12	42436440	42577512	141073	1	567751	NM_001080602	494463	ENSDARG00000100244	ebf3a	EBF transcription factor 3a
chr16	729198	729412	215	*	2.44	2.79	1.29	1.51	0.0148	0.0497	Distal Intergenic	16	813610	817767	4158	1	403019	NM_207184	-84198	ENSDARG00000101831	irx1a	iroquois homeobox 1a
chr4	7248900	7249296	397	*	3.56	3.92	2.34	1.58	0.0148	0.0497	Distal Intergenic	4	7391354	7406259	14906	1	449825	NM_001005998	-142058	ENSDARG00000099870	tnni4a	troponin I4a
chr13	24745165	24745358	194	*	3.4	3.71	2.43	1.28	0.0148	0.0497	Promoter (<=1kb)	13	24742724	24745158	2435	2	568747	NM_001082860	-7	ENSDARG00000021974	sfr1	SWI5-dependent homologous recombination repair protein 1
chr7	41442063	41442338	276	*	3.79	4.13	2.68	1.45	0.0148	0.0497	Intron (NM_001127306/562140, intron 11 of 12)	7	41439136	41468765	29630	2	562140	NM_001127306	26427	ENSDARG00000019969	smarcd3b	SWI/SNF related, matrix associated, actin dependent regulator of chromatin, subfamily d, member 3b
chr18	49882053	49882265	213	*	2.25	1.67	2.98	-1.31	0.0148	0.0497	Distal Intergenic	18	49969568	50040162	70595	1	724012	NM_001045317	-87303	ENSDARG00000012005	mob2b	MOB kinase activator 2b
chr17	15041551	15041757	207	*	2.29	1.65	3.07	-1.42	0.0148	0.0497	Distal Intergenic	17	15018220	15029427	11208	2	393321	NM_200350	-12124	ENSDARG00000015228	ero1a	endoplasmic reticulum oxidoreductase alpha
chr15	2803548	2803751	204	*	2.54	2.93	1.16	1.77	0.0148	0.0497	Promoter (<=1kb)	15	2779513	2803475	23963	2	359834	NM_182873	-73	ENSDARG00000041502	tgfb1a	transforming growth factor, beta 1a
chr1	42588047	42588166	120	*	2.03	1.37	2.83	-1.45	0.0148	0.0497	Intron (NM_001159372/567500, intron 5 of 15)	1	42279716	43035079	755364	1	567500	NM_001159372	308331	ENSDARG00000024785	ctnna2	catenin (cadherin-associated protein), alpha 2
chr15	26222675	26222908	234	*	1.4	0.6	2.3	-1.7	0.0148	0.0497	Intron (NM_203480/403308, intron 1 of 2)	15	26091399	26402301	310903	1	403308	NM_203480	131276	ENSDARG00000098528	rtn4rl1b	reticulon 4 receptor-like 1b
chr22	16884929	16885213	285	*	3.2	2.53	4.01	-1.48	0.0148	0.0497	Exon (NM_001079962/556665, exon 7 of 11)	22	16839471	16997475	158005	2	556665	NM_001079962	112262	ENSDARG00000062420	nfia	nuclear factor I/A
chr15	39877833	39878198	366	*	2.46	1.8	3.26	-1.45	0.0148	0.0497	Distal Intergenic	15	39277653	39819928	542276	2	30769	NM_001365167	-57905	ENSDARG00000026784	robo1	roundabout, axon guidance receptor, homolog 1 (Drosophila)
chr3	34549563	34549833	271	*	2.14	1.55	2.88	-1.33	0.0148	0.0497	Intron (NM_198911/337243, intron 1 of 10)	3	34455323	34561302	105980	2	337243	NM_198911	11469	ENSDARG00000020235	sept9a	septin 9a
chr9	53575179	53575510	332	*	3.93	4.41	1.73	2.68	0.0147	0.0492	Distal Intergenic	9	53657538	53665718	8181	2	30456	NM_131209	90208	ENSDARG00000006467	pcdh8	protocadherin 8
chr6	43517459	43517595	137	*	3.43	2.64	4.31	-1.67	0.0147	0.0492	Distal Intergenic	6	43491635	43498996	7362	2	107990272	NM_001328152	-18463	ENSDARG00000091832	si:dkey-58f6.2	si:dkey-58f6.2
chr8	43551429	43551746	318	*	3.29	3.58	2.4	1.19	0.0147	0.0493	Intron (NM_001007032/561503, intron 1 of 44)	8	43379436	43574935	195500	2	561503	NM_001007032	23189	ENSDARG00000000966	ncor2	nuclear receptor corepressor 2
chr10	33075776	33076002	227	*	3.07	3.44	1.83	1.61	0.0147	0.0493	Distal Intergenic	10	33171862	33179915	8054	1	550569	NM_001017871	-95860	ENSDARG00000062592	myl10	myosin, light chain 10, regulatory
chr14	28933524	28933858	335	*	3.66	4.01	2.51	1.5	0.0147	0.0493	Distal Intergenic	14	28563106	28566238	3133	2	566735	NM_001039064	-367286	ENSDARG00000034610	insb	preproinsulin b
chr11	31689463	31689648	186	*	2.7	3.04	1.65	1.39	0.0147	0.0493	Intron (NM_001003624/445230, intron 1 of 5)	11	31680557	31825884	145328	1	445230	NM_001003624	8906	ENSDARG00000090785	diaph3	diaphanous-related formin 3
chr5	61392660	61392807	148	*	3.73	3.01	4.57	-1.56	0.0147	0.0493	Exon (NM_199780/327294, exon 5 of 9)	5	61361815	61403813	41999	1	327294	NM_199780	30845	ENSDARG00000018985	castor2	cytosolic arginine sensor for mTORC1 subunit 2
chr8	22580860	22581027	168	*	1.68	1	2.49	-1.49	0.0147	0.0493	Distal Intergenic	8	22544290	22558564	14275	2	333999	NM_199849	-22296	ENSDARG00000052455	porcnl	porcupine O-acyltransferase like
chr25	4449750	4450014	265	*	3.18	3.49	2.28	1.21	0.0147	0.0493	Distal Intergenic	25	4635355	4660072	24718	1	777617	NM_001077725	-185341	ENSDARG00000014311	pgghg	protein-glucosylgalactosylhydroxylysine glucosidase
chr13	24876443	24876562	120	*	3.08	2.49	3.81	-1.32	0.0147	0.0493	Distal Intergenic	13	24842857	24850867	8011	1	568887	NM_001110395	33586	ENSDARG00000061498	dusp13a	dual specificity phosphatase 13a
chr22	3838407	3838902	496	*	4.55	4.83	3.73	1.09	0.0147	0.0493	Distal Intergenic	22	3914318	3929075	14758	1	796419	NM_001317750	-75416	ENSDARG00000059039	mhc1ula	major histocompatibility complex class I ULA
chr20	23425801	23426171	371	*	3.04	2.49	3.74	-1.25	0.0147	0.0493	Promoter (<=1kb)	20	23423814	23426340	2527	2	369189	NM_194381	169	ENSDARG00000019706	zar1	zygote arrest 1
chr6	43748650	43748769	120	*	3.89	3.47	4.48	-1.01	0.0147	0.0493	Intron (NM_001039637/569047, intron 5 of 19)	6	43602142	43882696	280555	2	569047	NM_001039637	133927	ENSDARG00000014181	foxp1b	forkhead box P1b
chr24	35699070	35699713	644	*	5.97	6.22	5.3	0.92	0.0147	0.0493	Promoter (<=1kb)	24	35679223	35699546	20324	2	557679	NM_001109702	0	ENSDARG00000099943	mapre2	microtubule-associated protein, RP/EB family, member 2
chr23	4583589	4584308	720	*	4.85	5.15	3.94	1.21	0.0147	0.0493	Distal Intergenic	23	4699159	4704938	5780	2	326846	NM_199749	120630	ENSDARG00000045776	cnbpa	CCHC-type zinc finger, nucleic acid binding protein a
chr7	45353100	45353391	292	*	1.48	0.73	2.33	-1.61	0.0147	0.0493	Distal Intergenic	7	45400759	45403559	2801	1	406359	NM_001103194	-47368	ENSDARG00000007745	uqcrfs1	ubiquinol-cytochrome c reductase, Rieske iron-sulfur polypeptide 1
chr18_KZ115560v1_alt	292102	292278	177	*	3.77	2.45	4.91	-2.46	0.0147	0.0493	Distal Intergenic	742	177731	198733	21003	2	393691	NM_200718	-93369	ENSDARG00000041062	calb2a	calbindin 2a
chr10	29413788	29413967	180	*	2.17	2.54	0.88	1.66	0.0147	0.0493	Intron (NM_001012378/497638, intron 1 of 23)	10	29339359	29705347	365989	1	497638	NM_001012378	74429	ENSDARG00000099323	dlg2	discs, large homolog 2 (Drosophila)
chr16	1722767	1722920	154	*	0.97	0.05	1.92	-1.87	0.0147	0.0493	Distal Intergenic	16	1470418	1503023	32606	2	260351	NM_178222	-219744	ENSDARG00000023316	sim1a	SIM bHLH transcription factor 1a
chr19	44577963	44578184	222	*	2.09	1.35	2.94	-1.59	0.0147	0.0493	Distal Intergenic	19	44068414	44089509	21096	2	566831	NM_001045120	-488454	ENSDARG00000035655	rad21b	RAD21 cohesin complex component b
chr21	4691768	4692021	254	*	4.27	4.6	3.21	1.4	0.0147	0.0493	Intron (NM_199901/334460, intron 1 of 28)	21	4647784	4695511	47728	2	334460	NM_199901	3490	ENSDARG00000024219	cdk5rap2	CDK5 regulatory subunit associated protein 2
chr6	4521372	4521565	194	*	1.5	0.65	2.41	-1.76	0.0147	0.0493	Distal Intergenic	6	4539953	4543005	3053	1	58057	NM_001312866	-18388	ENSDARG00000005559	pou4f1	POU class 4 homeobox 1
chr8_KZ115277v1_alt	171092	171224	133	*	1.39	0.57	2.3	-1.73	0.0147	0.0493	Intron (NM_001037705/571995, intron 2 of 3)	386	146511	203537	57027	2	571995	NM_001037705	32313	ENSDARG00000041750	ccdc92	coiled-coil domain containing 92
chr16	47635913	47636041	129	*	2.64	2.09	3.34	-1.26	0.0147	0.0493	Distal Intergenic	16	47428735	47449997	21263	1	503758	NM_001013336	207178	ENSDARG00000026835	slc25a32b	solute carrier family 25 member 32b
chr2	49117088	49117207	120	*	2.06	1.27	2.94	-1.67	0.0147	0.0493	Intron (NM_001366315/562398, intron 1 of 16)	2	49093080	49344411	251332	1	562398	NM_001366315	24008	ENSDARG00000036626	sema6ba	sema domain, transmembrane domain (TM), and cytoplasmic domain, (semaphorin) 6Ba
chr8	2882421	2882557	137	*	1.88	1.28	2.62	-1.34	0.0147	0.0493	Intron (NM_001045162/568520, intron 7 of 14)	8	2826641	2907167	80527	1	568520	NM_001045162	55780	NA	crb2b	crumbs cell polarity complex component 2b
chr9	8994676	8995084	409	*	2.85	2.37	3.49	-1.11	0.0147	0.0493	Distal Intergenic	9	8972840	8979468	6629	2	678608	NM_001040356	-15208	ENSDARG00000019116	ing1	inhibitor of growth family, member 1
chr6	45518667	45518880	214	*	3	2.54	3.63	-1.09	0.0147	0.0493	Intron (NM_001080051/571349, intron 1 of 22)	6	45494227	45838090	343864	1	571349	NM_001080051	24440	ENSDARG00000098161	cntn4	contactin 4
chr11	40696221	40696604	384	*	3.1	3.45	1.98	1.46	0.0147	0.0493	Distal Intergenic	11	40714075	40728343	14269	2	492767	NM_001007408	31739	ENSDARG00000015010	ccdc114	coiled-coil domain containing 114
chr23	3172127	3172370	244	*	3.03	2.51	3.71	-1.2	0.0147	0.0493	Distal Intergenic	23	3405665	3409140	3476	2	30210	NM_131015	236770	ENSDARG00000017121	mafba	v-maf avian musculoaponeurotic fibrosarcoma oncogene homolog Ba
chr21	25057167	25057381	215	*	3.5	2.74	4.36	-1.62	0.0147	0.0493	Promoter (2-3kb)	21	25054420	25062590	8171	1	795694	NM_001109726	2747	ENSDARG00000056244	zgc:171740	zgc:171740
chr1	44999958	45000113	156	*	3.02	3.36	1.9	1.46	0.0147	0.0493	Promoter (2-3kb)	1	45002998	45014431	11434	1	323922	NM_199662	-2885	ENSDARG00000030972	dnaja1	DnaJ heat shock protein family (Hsp40) member A1
chr21	5795948	5796071	124	*	4.09	3.31	4.97	-1.66	0.0147	0.0493	Exon (NM_213221/406239, exon 3 of 7)	21	5704393	5826422	122030	1	101180909	NM_001278851	91555	NA	shroom3	shroom family member 3
chr5	51815403	51815523	121	*	2.51	1.86	3.3	-1.44	0.0147	0.0493	Intron (NM_001002496/436769, intron 1 of 7)	5	51774986	51831010	56025	2	436769	NM_001326290	15487	ENSDARG00000101759	homer1b	homer scaffold protein 1b
chr1	51062268	51062499	232	*	4.63	4.89	3.94	0.95	0.0147	0.0493	Promoter (<=1kb)	1	51048989	51062375	13387	2	58026	NM_131514	0	ENSDARG00000015540	psen2	presenilin 2
chr6	11579424	11579759	336	*	2.29	1.67	3.05	-1.38	0.0147	0.0493	Distal Intergenic	6	11760783	11764335	3553	1	561301	NM_001100143	-181024	ENSDARG00000075700	zswim2	zinc finger, SWIM-type containing 2
chr12	27077976	27078404	429	*	2.74	2.1	3.53	-1.43	0.0147	0.0493	Distal Intergenic	12	27099952	27114836	14885	1	564075	NM_001105524	-21548	ENSDARG00000054023	ttll6	tubulin tyrosine ligase-like family, member 6
chr9	26521285	26521516	232	*	4.08	3.64	4.69	-1.05	0.0147	0.0494	Distal Intergenic	9	26103814	26123706	19893	1	30219	NM_131023	417471	ENSDARG00000020164	efnb2a	ephrin-B2a
chr6	37155064	37155264	201	*	1.97	1.3	2.77	-1.47	0.0147	0.0494	Intron (NM_001003851/445374, intron 6 of 6)	6	36942984	37164417	221434	1	445374	NM_001003851	212080	ENSDARG00000021607	negr1	neuronal growth regulator 1
chr16	2101735	2102036	302	*	1.41	0.68	2.26	-1.58	0.0147	0.0494	Distal Intergenic	16	2515198	2558653	43456	2	571825	NM_001162542	456617	ENSDARG00000077145	adcy3a	adenylate cyclase 3a
chr5	66338565	66338684	120	*	1.98	1.21	2.85	-1.64	0.0147	0.0494	Distal Intergenic	5	66346884	66351766	4883	2	797490	NM_001169147	13082	ENSDARG00000059486	cplx4b	complexin 4b
chr5	20185625	20186004	380	*	2.89	3.24	1.78	1.45	0.0147	0.0494	Promoter (<=1kb)	5	20170709	20185665	14957	2	405800	NM_214732	0	ENSDARG00000035603	dao.2	D-amino-acid oxidase, tandem duplicate 2
chr10	45059643	45060193	551	*	4.28	4.53	3.58	0.95	0.0147	0.0494	Promoter (<=1kb)	10	45059797	45070182	10386	1	406472	NM_213191	0	ENSDARG00000098361	nudcd3	NudC domain containing 3
chr9	54563384	54563503	120	*	3.45	2.19	4.56	-2.37	0.0147	0.0494	Distal Intergenic	9	54629993	54679573	49581	1	436730	NM_001002457	-66490	ENSDARG00000045958	egfl6	EGF-like-domain, multiple 6
chr9	24388722	24389231	510	*	4.57	3.96	5.33	-1.37	0.0147	0.0494	Intron (NM_001128365/100004613, intron 2 of 9)	9	24249485	24412544	163060	2	100004613	NM_001128365	23313	ENSDARG00000051824	tmeff2a	transmembrane protein with EGF-like and two follistatin-like domains 2a
chr12	31584031	31584433	403	*	2.9	2.4	3.57	-1.17	0.0147	0.0494	Distal Intergenic	12	31616515	31631297	14783	1	337172	NM_212770	-32082	ENSDARG00000005185	cpn1	carboxypeptidase N, polypeptide 1
chr13	5438	5557	120	*	3.57	2.82	4.42	-1.6	0.0147	0.0494	Distal Intergenic	13	8827	15401	6575	1	336198	NM_200001	-3270	ENSDARG00000103415	ppp4r3b	protein phosphatase 4, regulatory subunit 3B
chr13	7544829	7544957	129	*	5.78	5.54	6.18	-0.64	0.0147	0.0494	Distal Intergenic	13	7556315	7573670	17356	2	402974	NM_205675	28713	ENSDARG00000070069	pitx3	paired-like homeodomain 3
chr2	26720664	26721019	356	*	4.33	4.61	3.52	1.08	0.0147	0.0494	Distal Intergenic	2	26682969	26688908	5940	1	437018	NM_001002745	37695	ENSDARG00000003517	impa1	inositol monophosphatase 1
chr19	38926149	38926269	121	*	2.1	1.28	3	-1.72	0.0147	0.0494	Distal Intergenic	19	38422059	38467664	45606	1	321212	NM_212579	504090	ENSDARG00000024492	col9a2	procollagen, type IX, alpha 2
chr6	11830621	11830925	305	*	4.18	4.44	3.46	0.98	0.0147	0.0494	Distal Intergenic	6	11781324	11812113	30790	2	100136862	NM_001114580	-18508	ENSDARG00000057772	2021-03-07	membrane-associated ring finger (C3HC4) 7
chr2	49506819	49507195	377	*	3.54	3.89	2.39	1.51	0.0147	0.0494	Intron (NM_200301/100005753, intron 8 of 9)	2	49457669	49511063	53395	1	100005753	NM_200301	49150	ENSDARG00000067958	sh3gl1a	SH3-domain GRB2-like 1a
chr18	147686	147805	120	*	3.65	2.91	4.5	-1.6	0.0147	0.0494	Promoter (2-3kb)	18	113845	150664	36820	2	280653	NM_001030061	2859	ENSDARG00000036232	trpm7	transient receptor potential cation channel, subfamily M, member 7
chr14	33613453	33614013	561	*	4.63	4.91	3.8	1.11	0.0147	0.0494	Promoter (<=1kb)	14	33591626	33613768	22143	2	394007	NM_201032	0	ENSDARG00000026017	xpnpep2	X-prolyl aminopeptidase (aminopeptidase P) 2, membrane-bound
chr12	37151475	37151905	431	*	2.71	2.11	3.46	-1.35	0.0147	0.0494	Distal Intergenic	12	37275333	37299671	24339	2	678607	NM_001040355	147766	ENSDARG00000060457	pmp22b	peripheral myelin protein 22b
chr15	3595199	3595553	355	*	4.02	4.33	3.06	1.27	0.0147	0.0494	Distal Intergenic	15	3455807	3534601	78795	2	393290	NM_001320347	-60598	ENSDARG00000103149	cog6	component of oligomeric golgi complex 6
chr19	1963051	1963251	201	*	3.56	3.86	2.66	1.2	0.0147	0.0494	Intron (NM_198819/386705, intron 28 of 29)	19	1743043	2214712	471670	1	386705	NM_198819	220008	NA	ptk2aa	protein tyrosine kinase 2aa
chr5	64593469	64593757	289	*	3.4	3.7	2.51	1.19	0.0147	0.0494	Distal Intergenic	5	64476562	64511428	34867	2	793011	NM_131153	-82041	ENSDARG00000035127	rxrab	retinoid x receptor, alpha b
chr1	37713468	37713619	152	*	1.63	0.91	2.46	-1.55	0.0147	0.0494	Distal Intergenic	1	37753127	38131157	378031	1	568915	NM_001145602	-39508	ENSDARG00000040048	si:ch211-15e22.3	si:ch211-15e22.3
chr6	56320569	56320821	253	*	2.05	1.48	2.77	-1.29	0.0147	0.0494	Distal Intergenic	6	56147847	56179707	31861	1	494033	NM_001008576	172722	ENSDARG00000040606	tfap2c	transcription factor AP-2 gamma (activating enhancer binding protein 2 gamma)
chr14	22281815	22281999	185	*	1.59	0.73	2.52	-1.78	0.0147	0.0494	Distal Intergenic	14	22172100	22273845	101746	1	336252	NM_001024387	109715	ENSDARG00000079586	gabrb2a	gamma-aminobutyric acid type A receptor beta2 subunit a
chr19	5292286	5292604	319	*	3.93	4.24	3.01	1.23	0.0147	0.0494	Distal Intergenic	19	5318456	5319970	1515	1	407709	NM_214794	-25852	ENSDARG00000059109	si:dkeyp-113d7.1	si:dkeyp-113d7.1
chr16	6769273	6769452	180	*	2.01	1.33	2.82	-1.49	0.0147	0.0494	Distal Intergenic	16	6750747	6757298	6552	1	572232	NR_023328	18526	NA	znf236	zinc finger protein 236
chr5	20111857	20112344	488	*	4.81	5.12	3.86	1.26	0.0147	0.0494	Promoter (<=1kb)	5	20112032	20113286	1255	1	558956	NM_001204169	0	ENSDARG00000086374	isg15	ISG15 ubiquitin like modifier
chr5	514782	514906	125	*	3.98	3.58	4.54	-0.95	0.0147	0.0494	Distal Intergenic	5	480091	496783	16693	1	30747	NM_131461	34691	ENSDARG00000028663	tek	TEK tyrosine kinase, endothelial
chr15	13265374	13265656	283	*	2.28	1.67	3.05	-1.38	0.0147	0.0494	Distal Intergenic	15	13107346	13253724	146379	2	100003690	NM_001113649	-11650	ENSDARG00000105059	zgc:172282	zgc:172282
chr9	46039343	46039663	321	*	4.33	3.66	5.13	-1.47	0.0147	0.0494	Exon (NM_001039358/568877, exon 2 of 25)	9	45884041	46072805	188765	2	568877	NM_001039358	33142	ENSDARG00000098349	hdac4	histone deacetylase 4
chr13	37206769	37206889	121	*	3.03	2.56	3.67	-1.11	0.0147	0.0494	Distal Intergenic	13	37273221	37289031	15811	1	100310830	NM_001166338	-66332	ENSDARG00000027472	gphb5	glycoprotein hormone subunit beta 5
chr16	5768872	5769414	543	*	4.19	4.53	3.09	1.45	0.0147	0.0494	Distal Intergenic	16	5717761	5721383	3623	2	445122	NM_001003516	-47489	ENSDARG00000041400	ndufa3	NADH:ubiquinone oxidoreductase subunit A3
chr25	15207828	15208006	179	*	1.75	1.06	2.56	-1.5	0.0147	0.0494	Exon (NM_131046/30245, exon 2 of 9)	25	15178341	15214335	35995	2	30245	NM_131046	6329	ENSDARG00000031420	wt1a	WT1 transcription factor a
chr17	12700641	12700920	280	*	3.69	3.99	2.78	1.21	0.0147	0.0494	Promoter (2-3kb)	17	12698532	12708706	10175	1	436836	NM_001002563	2109	ENSDARG00000043932	stmn4l	stathmin-like 4, like
chr21	12007399	12007630	232	*	1.89	1.18	2.72	-1.54	0.0147	0.0494	Promoter (2-3kb)	21	12010579	12020299	9721	1	334529	NM_199910	-2949	ENSDARG00000026787	aqp7	aquaporin 7
chr6	52197535	52197658	124	*	1.73	1.03	2.56	-1.53	0.0147	0.0494	Distal Intergenic	6	52212574	52222954	10381	1	323055	NM_001082798	-14916	ENSDARG00000013078	ywhaba	tyrosine 3-monooxygenase/tryptophan 5-monooxygenase activation protein, beta polypeptide a
chr15	30254070	30254215	146	*	2.93	2.38	3.64	-1.26	0.0147	0.0494	Intron (NM_001113485/563460, intron 5 of 11)	15	30157602	30301526	143925	1	563460	NM_001113485	96468	ENSDARG00000028793	nlk2	nemo-like kinase, type 2
chr13	23962839	23963115	277	*	3.95	4.21	3.21	1.01	0.0147	0.0494	Distal Intergenic	13	23988453	23995874	7422	1	322485	NM_198063	-25338	ENSDARG00000016412	agt	angiotensinogen
chr14_KZ115445v1_alt	295387	295507	121	*	3.77	2.32	4.96	-2.64	0.0147	0.0494	Intron (NM_001017604/550267, intron 10 of 16)	602	274516	303261	28746	1	550267	NM_001017604	20871	ENSDARG00000087538	kif3a	kinesin family member 3A
chr22	27131443	27131587	145	*	2.6	3.02	0.99	2.03	0.0147	0.0494	Distal Intergenic	22	27092469	27115219	22751	2	406253	NM_212980	-16224	ENSDARG00000029011	xpnpep1	X-prolyl aminopeptidase (aminopeptidase P) 1, soluble
chr4	31506471	31506629	159	*	2.58	2.03	3.29	-1.26	0.0147	0.0494	Distal Intergenic	4	31639423	31647591	8169	2	794656	NM_001128355	140962	ENSDARG00000106998	LOC794656	novel NACHT domain containing protein
chr8	50783498	50783848	351	*	2.92	3.29	1.7	1.59	0.0147	0.0494	Intron (NM_001123044/323976, intron 3 of 23)	8	50743037	50839565	96529	1	323976	NM_001123044	40461	ENSDARG00000099651	bin3	bridging integrator 3
chr16	49877247	49877479	233	*	2.25	2.62	0.99	1.62	0.0147	0.0494	Distal Intergenic	16	50007000	50076303	69304	1	445100	NM_001003494	-129521	ENSDARG00000034670	ube2e2	ubiquitin-conjugating enzyme E2E 2
chr5	13373618	13373737	120	*	1.6	0.89	2.43	-1.54	0.0147	0.0494	Promoter (<=1kb)	5	13373593	13376423	2831	1	100192211	NM_001136248	25	ENSDARG00000035632	ccl19a.2	chemokine (C-C motif) ligand 19a, tandem duplicate 2
chr10	30778540	30778766	227	*	1.9	1.24	2.7	-1.46	0.0147	0.0494	Intron (NM_001005580/449538, intron 1 of 6)	10	30617836	30785503	167668	2	449538	NM_001005580	6737	ENSDARG00000013005	opcml	opioid binding protein/cell adhesion molecule-like
chr14	49055359	49055480	122	*	2.28	1.6	3.08	-1.49	0.0147	0.0494	Intron (NM_001083566/571702, intron 2 of 9)	14	49040641	49063124	22484	2	571702	NM_001083566	7644	ENSDARG00000014233	sept8b	septin 8b
chr21	26877007	26877253	247	*	1.73	1.03	2.55	-1.52	0.0147	0.0494	Exon (NM_001328356/553283, exon 10 of 21)	21	26733345	26966059	232715	1	553283	NM_001328356	143662	ENSDARG00000098766	pcxa	pyruvate carboxylase a
chr22	11861124	11861339	216	*	1.83	1	2.73	-1.74	0.0147	0.0494	Distal Intergenic	22	11781036	11833317	52282	2	407634	NM_001044313	-27807	ENSDARG00000000183	ptpn4b	protein tyrosine phosphatase non-receptor type 4b
chr1	4516920	4517121	202	*	2.62	1.89	3.47	-1.58	0.0147	0.0494	Distal Intergenic	1	4101741	4154332	52592	1	324096	NM_001305553	415179	ENSDARG00000098769	slitrk6	SLIT and NTRK-like family, member 6
chr14	25067237	25067716	480	*	2.09	1.41	2.9	-1.49	0.0147	0.0494	Exon (NM_001007136/556124, exon 15 of 20)	14	25063320	25078580	15261	2	556124	NM_001007136	10864	ENSDARG00000001162	matr3l1.1	matrin 3-like 1.1
chr3	14571192	14571664	473	*	4.38	4.63	3.67	0.96	0.0147	0.0494	Promoter (<=1kb)	3	14565761	14571510	5750	2	100329809	NM_001328088	0	ENSDARG00000093423	swsap1	SWIM-type zinc finger 7 associated protein 1
chr9	50304110	50304300	191	*	2.66	2.99	1.62	1.37	0.0147	0.0494	Distal Intergenic	9	50038603	50206153	167551	1	100332245	NM_001365214	265507	NA	cobll1b	cordon-bleu WH2 repeat protein-like 1b
chr6	45491343	45491567	225	*	2.65	2	3.43	-1.42	0.0147	0.0494	Promoter (2-3kb)	6	45494227	45838090	343864	1	571349	NM_001080051	-2660	ENSDARG00000098161	cntn4	contactin 4
chr19	2147036	2147278	243	*	2.87	3.25	1.56	1.68	0.0147	0.0495	Intron (NM_198819/386705, intron 29 of 29)	19	1743043	2214712	471670	1	386705	NM_198819	403993	NA	ptk2aa	protein tyrosine kinase 2aa
chr19	6928162	6928454	293	*	3.27	3.55	2.45	1.1	0.0147	0.0495	Distal Intergenic	19	6938356	6955300	16945	1	561345	NM_130913	-9902	ENSDARG00000001710	flot1a	flotillin 1a
chr5	17773310	17773435	126	*	1.54	0.71	2.45	-1.74	0.0147	0.0495	Distal Intergenic	5	17780475	17813299	32825	1	564271	NM_001100015	-7040	ENSDARG00000075347	chfr	checkpoint with forkhead and ring finger domains, E3 ubiquitin protein ligase
chr19	34107162	34107465	304	*	3.43	3.77	2.34	1.43	0.0147	0.0495	Exon (NM_001077280/768134, exon 3 of 6)	19	34091552	34117056	25505	2	768134	NM_001077280	9591	ENSDARG00000077407	si:dkey-184p18.2	si:dkey-184p18.2
chr11	23430631	23430845	215	*	1.74	1.1	2.51	-1.41	0.0147	0.0495	Distal Intergenic	11	23312193	23322194	10002	2	100134982	NM_001113489	-108437	ENSDARG00000075829	kiss1	KiSS-1 metastasis suppressor
chr21	26996647	26997009	363	*	3.95	3.28	4.76	-1.48	0.0147	0.0495	3' UTR	21	26996290	27010792	14503	2	564838	NM_001045853	13783	ENSDARG00000044541	ppp1r14ba	protein phosphatase 1, regulatory (inhibitor) subunit 14Ba
chr11	44296865	44297016	152	*	4.01	3.36	4.79	-1.43	0.0147	0.0495	Exon (NM_001110486/100004879, exon 4 of 6)	11	44226491	44445624	219134	1	492811	NM_001007452	70374	ENSDARG00000115383	gnb4b	guanine nucleotide binding protein (G protein), beta polypeptide 4b
chr8	22558493	22558846	354	*	4.7	4.26	5.31	-1.05	0.0147	0.0495	Promoter (<=1kb)	8	22544290	22558564	14275	2	333999	NM_199849	0	ENSDARG00000052455	porcnl	porcupine O-acyltransferase like
chr12	3109930	3110095	166	*	1.48	0.79	2.3	-1.51	0.0147	0.0495	Exon (NM_201478/325675, exon 41 of 51)	12	3095699	3133454	37756	2	325675	NM_201478	23359	ENSDARG00000035809	col1a1b	collagen, type I, alpha 1b
chr15	1709136	1709314	179	*	2.65	2.12	3.34	-1.22	0.0147	0.0495	Exon (NM_001309456/572364, exon 2 of 4)	15	1705167	1711472	6306	1	572364	NM_001309456	3969	ENSDARG00000058960	otol1b	otolin 1b
chr15	25534263	25534564	302	*	2.31	1.65	3.11	-1.46	0.0147	0.0495	Distal Intergenic	15	25503962	25527554	23593	2	393376	NM_200405	-6709	ENSDARG00000100826	hif1al	hypoxia inducible factor 1 subunit alpha, like
chr24	9868792	9869026	235	*	2.87	3.2	1.79	1.42	0.0146	0.049	Distal Intergenic	24	9881294	9893795	12502	1	334102	NM_212721	-12268	ENSDARG00000023028	cdv3	carnitine deficiency-associated gene expressed in ventricle 3
chr15	12768572	12768703	132	*	2.29	1.75	3	-1.25	0.0146	0.049	Distal Intergenic	15	12516188	12545683	29496	2	777666	NR_144433	-222889	ENSDARG00000101713	scn2b	sodium channel, voltage-gated, type II, beta
chr8	813634	813770	137	*	7.52	7.68	7.14	0.53	0.0146	0.049	Distal Intergenic	8	902753	912821	10069	2	562469	NM_001039629	99051	ENSDARG00000059236	ptger4a	prostaglandin E receptor 4 (subtype EP4) a
chr8	24481552	24481769	218	*	2	1.29	2.83	-1.54	0.0146	0.049	Distal Intergenic	8	24281525	24295947	14423	1	406397	NM_213123	200027	ENSDARG00000042816	mmp9	matrix metallopeptidase 9
chr25	5862824	5862943	120	*	2.27	1.47	3.16	-1.69	0.0146	0.049	Distal Intergenic	25	5822114	5842038	19925	1	100535414	NM_001302783	40710	ENSDARG00000100152	c25h12orf75	chromosome 25 C12orf75 homolog
chr17	14613036	14613185	150	*	2.67	3.03	1.51	1.51	0.0146	0.049	Promoter (<=1kb)	17	14605750	14613697	7948	2	563642	NM_001327936	512	ENSDARG00000074698	sdsl	serine dehydratase-like
chr12	42465262	42465395	134	*	2.17	1.61	2.89	-1.28	0.0146	0.049	Intron (NM_001080602/567751, intron 6 of 15)	12	42436440	42577512	141073	1	567751	NM_001080602	28822	ENSDARG00000100244	ebf3a	EBF transcription factor 3a
chr20	29506960	29507116	157	*	4.29	4.57	3.51	1.06	0.0146	0.049	Promoter (1-2kb)	20	29502136	29505863	3728	2	560787	NM_001044941	-1097	ENSDARG00000030844	klf11a	Kruppel-like factor 11a
chr8	50911804	50911982	179	*	1.63	0.88	2.49	-1.61	0.0146	0.049	Distal Intergenic	8	50942240	50950548	8309	1	791742	NM_213126	-30258	ENSDARG00000015887	b2ml	beta-2-microglobulin, like
chr20	1988492	1988627	136	*	5.19	4.89	5.65	-0.76	0.0146	0.049	Intron (NM_001278799/100049705, intron 36 of 57)	20	1799016	2035120	236105	1	100049705	NM_001278799	189476	NA	lama2	laminin, alpha 2
chr2	48957616	48958100	485	*	3.82	4.12	2.92	1.19	0.0146	0.049	Distal Intergenic	2	49007592	49031811	24220	2	436961	NM_001002688	73711	ENSDARG00000012627	cdc34b	cell division cycle 34 homolog (S. cerevisiae) b
chr2	25288236	25288368	133	*	1.4	0.58	2.31	-1.73	0.0146	0.049	Distal Intergenic	2	25378457	25540268	161812	1	572313	NM_001159832	-90089	ENSDARG00000078179	fndc3ba	fibronectin type III domain containing 3Ba
chr17	35629954	35630262	309	*	2.29	1.69	3.04	-1.36	0.0146	0.049	Distal Intergenic	17	35878547	35881807	3261	2	30602	NM_131336	251545	ENSDARG00000077811	sox11a	SRY-box transcription factor 11a
chr7	29053979	29054293	315	*	4.06	4.32	3.31	1.02	0.0146	0.049	Distal Intergenic	7	29044887	29052468	7582	1	777639	NM_001077746	9092	ENSDARG00000061145	gfod2	glucose-fructose oxidoreductase domain containing 2
chr5	34703079	34703402	324	*	2.71	3.1	1.27	1.83	0.0146	0.049	Distal Intergenic	5	34605797	34616625	10829	2	323613	NM_001309863	-86454	ENSDARG00000034368	hexb	hexosaminidase B (beta polypeptide)
chr24	30063843	30064117	275	*	2.7	2.06	3.49	-1.43	0.0146	0.049	Distal Intergenic	24	30120815	30199070	78256	1	100093705	NM_001099258	-56698	ENSDARG00000101348	plppr5b	phospholipid phosphatase related 5b
chr13	30394436	30394753	318	*	3.62	3.96	2.49	1.47	0.0146	0.049	Distal Intergenic	13	30506781	30568666	61886	1	561061	NM_001113339	-112028	ENSDARG00000074502	zmiz1a	zinc finger, MIZ-type containing 1a
chr17	1734128	1734353	226	*	3.32	2.9	3.92	-1.02	0.0146	0.049	Distal Intergenic	17	1664626	1703259	38634	2	497122	NM_001012261	-30869	ENSDARG00000032896	xgb	x globin
chr4	3554784	3555011	228	*	2.71	2.09	3.48	-1.38	0.0146	0.049	Intron (NM_001302228/792371, intron 1 of 9)	4	3482312	3745095	262784	1	792371	NM_001302228	72472	ENSDARG00000077654	grm8a	glutamate receptor, metabotropic 8a
chr3	32067333	32067478	146	*	0.88	0.03	1.8	-1.77	0.0146	0.049	Distal Intergenic	3	32074794	32079714	4921	2	503609	NM_001013296	12236	ENSDARG00000030881	baxb	BCL2 associated X, apoptosis regulator b
chr5	14768241	14768361	121	*	1.73	0.85	2.67	-1.81	0.0146	0.049	Distal Intergenic	5	14529740	14584229	54490	2	561895	NM_001128246	-184012	ENSDARG00000079611	sema4c	sema domain, immunoglobulin domain (Ig), transmembrane domain (TM) and short cytoplasmic domain, (semaphorin) 4C
chr16	54248692	54248910	219	*	1.95	1.27	2.76	-1.49	0.0146	0.0491	Distal Intergenic	16	54263921	54291748	27828	1	378718	NM_197935	-15011	ENSDARG00000014858	drd2l	dopamine receptor D2 like
chr3	7840545	7840802	258	*	1.95	1.32	2.72	-1.4	0.0146	0.0491	Exon (NM_001104940/561642, exon 14 of 15)	3	7839885	7897234	57350	2	561642	NM_001104940	56432	ENSDARG00000100508	ubn2b	ubinuclein 2b
chr25	29356020	29356191	172	*	1.71	0.97	2.57	-1.6	0.0146	0.0491	Intron (NM_001160156/368305, intron 1 of 7)	25	29318928	29363429	44502	2	368305	NM_001160156	7238	ENSDARG00000103002	nptna	neuroplastin a
chr11	7451056	7451229	174	*	2.34	2.71	1.13	1.58	0.0146	0.0491	Distal Intergenic	11	7383213	7410314	27102	2	406676	NM_213367	-40742	ENSDARG00000013653	adgrl4	adhesion G protein-coupled receptor L4
chr17	19600924	19601205	282	*	2.01	1.36	2.79	-1.43	0.0146	0.0491	Distal Intergenic	17	19609701	19626299	16599	2	641577	NM_001037575	25094	ENSDARG00000017569	reep3a	receptor accessory protein 3a
chr8	5777659	5777846	188	*	0.89	0.04	1.8	-1.76	0.0146	0.0491	Distal Intergenic	8	5202589	5220125	17537	2	323563	NM_001012242	-557534	ENSDARG00000025468	bnip3la	BCL2 interacting protein 3 like a
chr8	49206714	49206918	205	*	2.04	1.29	2.9	-1.6	0.0146	0.0491	Distal Intergenic	8	49173129	49201258	28130	2	571061	NM_001111203	-5456	ENSDARG00000075375	zgc:171501	zgc:171501
chr15	9373947	9374066	120	*	3.94	2.58	5.1	-2.51	0.0146	0.0491	Distal Intergenic	15	9327302	9347581	20280	1	445292	NM_001003748	46645	ENSDARG00000038107	sgcg	sarcoglycan, gamma
chr6	38773946	38774281	336	*	3.91	4.2	3.06	1.14	0.0146	0.0491	Promoter (<=1kb)	6	38773406	38790063	16658	1	792398	NM_001007318	540	ENSDARG00000055737	ube3a	ubiquitin protein ligase E3A
chr8	45539366	45539594	229	*	3.74	3.35	4.3	-0.96	0.0146	0.0491	Distal Intergenic	8	45418986	45430801	11816	2	406419	NM_213145	-108565	ENSDARG00000075758	ywhabb	tyrosine 3-monooxygenase/tryptophan 5-monooxygenase activation protein, beta polypeptide b
chr19	28047933	28048246	314	*	2.42	1.77	3.2	-1.43	0.0146	0.0491	Distal Intergenic	19	27970362	27974152	3791	1	550394	NM_001017699	77571	ENSDARG00000070623	med10	mediator complex subunit 10
chr10	40856789	40857013	225	*	2.76	3.09	1.76	1.33	0.0146	0.0491	Downstream (2-3kb)	10	40836378	40851677	15300	1	101883816	NM_001302246	20411	ENSDARG00000060688	trim69	tripartite motif containing 69
chr16	12571483	12571961	479	*	3.13	2.71	3.72	-1	0.0146	0.0491	Distal Intergenic	16	12521872	12560342	38471	1	102725533	NM_001289880	49611	ENSDARG00000074829	rasip1	Ras interacting protein 1
chr2	12972927	12973226	300	*	2.38	1.72	3.17	-1.45	0.0146	0.0491	Distal Intergenic	2	13224291	13254800	30510	2	394114	NM_201139	281574	ENSDARG00000012021	kdsr	3-ketodihydrosphingosine reductase
chr7	19664005	19664212	208	*	1.96	1.28	2.78	-1.5	0.0146	0.0491	Distal Intergenic	7	19613810	19614916	1107	2	794380	NM_001128785	-49089	ENSDARG00000100942	zgc:194655	zgc:194655
chr22	38518071	38518189	119	*	2.88	3.18	1.99	1.19	0.0146	0.0491	Promoter (1-2kb)	22	38506512	38516922	10411	2	550511	NM_001017813	-1149	ENSDARG00000086985	klc4	kinesin light chain 4
chr20	37436561	37436782	222	*	3.89	4.15	3.14	1.02	0.0146	0.0491	Intron (NM_001163291/561970, intron 6 of 25)	20	37383043	37470297	87255	1	561970	NM_001163291	53518	ENSDARG00000054137	adgrg6	adhesion G protein-coupled receptor G6
chr15	3735050	3735277	228	*	3.04	2.39	3.83	-1.45	0.0146	0.0491	Promoter (1-2kb)	15	3734792	3736773	1982	2	571773	NM_001080055	1496	ENSDARG00000062552	lpar6a	lysophosphatidic acid receptor 6a
chr21	23516707	23516842	136	*	2.79	3.12	1.75	1.38	0.0146	0.0491	Intron (NM_131202/30447, intron 1 of 17)	21	23338059	23746928	408870	2	30447	NM_131202	230086	ENSDARG00000056181	ncam1a	neural cell adhesion molecule 1a
chr9	3429526	3429936	411	*	4.37	4.63	3.63	1.01	0.0146	0.0491	Distal Intergenic	9	3397407	3400729	3323	2	30574	NM_131311	-28797	ENSDARG00000079964	dlx2a	distal-less homeobox 2a
chr22	697046	697460	415	*	5.49	4.89	6.24	-1.35	0.0146	0.0491	Distal Intergenic	22	710759	718615	7857	2	567222	NM_001200020	21155	ENSDARG00000078686	arl8a	ADP-ribosylation factor-like 8A
chr2	40188130	40188322	193	*	1.29	0.5	2.18	-1.68	0.0146	0.0491	Exon (NM_001126389/557261, exon 4 of 5)	2	40184215	40191574	7360	2	557261	NM_001126389	3252	ENSDARG00000112759	si:ch211-122l24.6	si:ch211-122l24.6
chr7	6581297	6581649	353	*	2.52	1.83	3.34	-1.51	0.0146	0.0491	Distal Intergenic	7	6652967	6668424	15458	1	791647	NM_213311	-71318	ENSDARG00000078619	pnp5a	purine nucleoside phosphorylase 5a
chr20	24596394	24596614	221	*	2.63	2.96	1.59	1.37	0.0146	0.0491	Distal Intergenic	20	24820971	24963038	142068	2	562195	NM_001044979	366424	ENSDARG00000004635	epha7	eph receptor A7
chr7	24722689	24723159	471	*	2.71	2.04	3.51	-1.47	0.0146	0.0491	Distal Intergenic	7	24714840	24719655	4816	2	406742	NM_213433	-3034	ENSDARG00000036345	cmtr2	cap methyltransferase 2
chr4	24057601	24057735	135	*	2.59	1.82	3.46	-1.64	0.0146	0.0491	Distal Intergenic	4	23888549	23963819	75271	2	373117	NM_194401	-93782	ENSDARG00000002131	celf2	cugbp, Elav-like family member 2
chr15	27704402	27704689	288	*	2.43	1.87	3.15	-1.28	0.0146	0.0491	3' UTR	15	27703411	27710353	6943	2	30463	NM_131216	5664	ENSDARG00000014018	lhx1a	LIM homeobox 1a
chr3	42046953	42047081	129	*	1.07	0.24	1.97	-1.73	0.0146	0.0491	Distal Intergenic	3	42090418	42120172	29755	1	555448	NM_001326490	-43337	ENSDARG00000074842	snx8a	sorting nexin 8a
chr15	12187658	12187890	233	*	2.6	3.03	0.97	2.06	0.0146	0.0491	Distal Intergenic	15	12274079	12318947	44869	2	333987	NM_199847	131057	ENSDARG00000100971	fxyd6	FXYD domain containing ion transport regulator 6
chr20	48414171	48414301	131	*	2.28	2.66	0.92	1.74	0.0146	0.0491	Distal Intergenic	20	48482924	48485354	2431	2	402941	NM_205644	71053	ENSDARG00000091756	insm1a	insulinoma-associated 1a
chr7	67124950	67125195	246	*	3.05	3.38	2	1.38	0.0146	0.0491	Distal Intergenic	7	67182386	67214980	32595	2	393645	NM_001362396	89785	NA	swap70a	switching B cell complex subunit SWAP70a
chrUn_KN150127v1	3572	3774	203	*	3.86	3.31	4.56	-1.25	0.0146	0.0491	Distal Intergenic	1335	17150	17259	110	1	100628804	NR_039380	-13376	NA	mir2189	microRNA mir-2189
chr9	39315287	39315479	193	*	1.82	1.2	2.59	-1.39	0.0146	0.0491	Distal Intergenic	9	38994232	39005300	11069	2	336165	NM_200000	-309987	ENSDARG00000014196	myl1	myosin, light chain 1, alkali; skeletal, fast
chr5	4533222	4533424	203	*	3.68	3.95	2.9	1.05	0.0146	0.0491	Promoter (<=1kb)	5	4533244	4547923	14680	1	561325	NM_001326449	0	ENSDARG00000101063	LOC561325	thiosulfate sulfurtransferase/rhodanese-like domain-containing protein 1
chr14	6158672	6159292	621	*	3.48	3.01	4.12	-1.11	0.0146	0.0491	Promoter (<=1kb)	14	6159356	6175681	16326	1	541427	NM_001013553	-64	ENSDARG00000025912	bscl2l	BSCL2 lipid droplet biogenesis associated, seipin, like
chr13	17268442	17268901	460	*	4.22	4.59	2.99	1.59	0.0146	0.0491	Intron (NM_001020701/553730, intron 2 of 6)	13	16922721	17464362	541642	2	553730	NM_001020701	195461	ENSDARG00000057166	lrmda	leucine rich melanocyte differentiation associated
chr7	38256795	38256914	120	*	1.79	1.13	2.59	-1.46	0.0146	0.0491	Distal Intergenic	7	38260466	38264380	3915	1	550572	NM_001017874	-3552	ENSDARG00000036064	cnep1r1	CTD nuclear envelope phosphatase 1 regulatory subunit 1
chr22	17345947	17346499	553	*	4.03	4.31	3.25	1.06	0.0146	0.0491	Distal Intergenic	22	17286841	17300609	13769	1	100004942	NM_001099429	59106	ENSDARG00000093021	si:dkey-171o17.8	si:dkey-171o17.8
chr3	45516047	45516560	514	*	3.52	2.94	4.25	-1.31	0.0146	0.0492	Distal Intergenic	3	45635077	45635186	110	1	100310761	NR_030667	-118517	ENSDARG00000085526	mir2195	microRNA mir-2195
chr13	13248716	13249136	421	*	4.14	4.49	2.99	1.5	0.0146	0.0492	Intron (NM_131606/58129, intron 5 of 17)	13	13213567	13294872	81306	2	58129	NM_131606	45736	ENSDARG00000004782	fgfr3	fibroblast growth factor receptor 3
chr14	28878885	28879005	121	*	1.51	0.76	2.36	-1.6	0.0146	0.0492	Distal Intergenic	14	28563106	28566238	3133	2	566735	NM_001039064	-312647	ENSDARG00000034610	insb	preproinsulin b
chr20	44056514	44056695	182	*	1.82	1.1	2.65	-1.55	0.0146	0.0492	Intron (NM_212862/405788, intron 1 of 6)	20	43996033	44090658	94626	2	405788	NM_212862	33963	ENSDARG00000059233	runx2b	RUNX family transcription factor 2b
chr25	5014939	5015141	203	*	3.34	3.68	2.22	1.46	0.0146	0.0492	Promoter (<=1kb)	25	5015035	5033064	18030	1	327253	NM_199775	0	ENSDARG00000086458	hdac10	histone deacetylase 10
chr12	21975470	21975744	275	*	2.87	3.17	1.95	1.22	0.0146	0.0492	Distal Intergenic	12	22258962	22304830	45869	1	569420	NM_001114552	-283218	ENSDARG00000038990	wnt3	wingless-type MMTV integration site family, member 3
chr25	16876378	16876606	229	*	1.92	1.21	2.74	-1.53	0.0146	0.0492	3' UTR	25	16853386	16877107	23722	1	777745	NM_001077789	22992	ENSDARG00000060987	zgc:154077	zgc:154077
chr17	51732532	51732651	120	*	3.59	2.32	4.7	-2.39	0.0146	0.0492	Distal Intergenic	17	51743921	51757548	13628	1	114426	NM_131801	-11270	ENSDARG00000007377	odc1	ornithine decarboxylase 1
chr24_KZ115715v1_alt	119333	119531	199	*	2.07	2.48	0.57	1.91	0.0146	0.0492	Promoter (1-2kb)	923	107766	118304	10539	2	553781	NM_001044326	-1029	ENSDARG00000057249	zmynd11	zinc finger, MYND-type containing 11
chr16	24878681	24878960	280	*	2.61	2.1	3.29	-1.19	0.0146	0.0492	Promoter (2-3kb)	16	24881122	24881218	97	1	100033542	NR_029985	-2162	ENSDARG00000082825	mirlet7d-1	microRNA let7d-1
chr12	39425179	39425308	130	*	3.19	2.56	3.96	-1.4	0.0146	0.0492	Distal Intergenic	12	38807645	38854965	47321	1	100151075	NM_001099246	617534	ENSDARG00000074041	abca5	ATP-binding cassette, sub-family A (ABC1), member 5
chr14	13659253	13659607	355	*	2.55	1.96	3.29	-1.33	0.0146	0.0492	Distal Intergenic	14	13752432	13843665	91234	1	751786	NM_001044746	-92825	ENSDARG00000102968	cnga2a	cyclic nucleotide gated channel subunit alpha 2a
chr1	8202614	8202843	230	*	2.84	3.19	1.72	1.47	0.0146	0.0492	Distal Intergenic	1	8165341	8192418	27078	2	555184	NM_001030080	-10196	ENSDARG00000022668	grapb	GRB2 related adaptor protein b
chr15	22007823	22008226	404	*	2.42	1.72	3.25	-1.54	0.0146	0.0492	Distal Intergenic	15	22014029	22024954	10926	1	100170831	NM_001130665	-5803	ENSDARG00000056921	ankk1	ankyrin repeat and kinase domain containing 1
chr13	45532544	45532737	194	*	1.74	0.98	2.61	-1.63	0.0146	0.0492	Intron (NM_200463/393435, intron 1 of 10)	13	45524475	45570500	46026	1	393435	NM_200463	8069	ENSDARG00000012741	maco1b	macoilin 1b
chr24	28055993	28056325	333	*	2.97	3.33	1.74	1.58	0.0146	0.0492	Distal Intergenic	24	28137211	28228917	91707	2	570772	NM_001030253	172592	ENSDARG00000094704	bcl2a	BCL2 apoptosis regulator a
chr2	12389624	12389928	305	*	3	3.35	1.85	1.51	0.0146	0.0492	Distal Intergenic	2	12255829	12280468	24640	1	30765	NM_199518	133795	ENSDARG00000011683	prtfdc1	phosphoribosyl transferase domain containing 1
chr4	1295346	1295528	183	*	1.62	0.89	2.46	-1.57	0.0146	0.0492	Distal Intergenic	4	1283111	1284598	1488	1	352938	NM_178301	12235	ENSDARG00000098612	chrm2a	cholinergic receptor, muscarinic 2a
chr17	52725452	52725876	425	*	2.73	2.21	3.42	-1.22	0.0146	0.0492	Distal Intergenic	17	52639492	52658733	19242	2	406513	NM_213232	-66719	ENSDARG00000041449	spred1	sprouty related EVH1 domain containing 1
chr25	32631597	32631903	307	*	3.8	3.23	4.52	-1.29	0.0146	0.0492	Intron (NM_001123047/100144551, intron 21 of 29)	25	32530976	32739728	208753	1	100144551	NM_001123047	100621	ENSDARG00000023104	scaper	S-phase cyclin A-associated protein in the ER
chr17	52743115	52743305	191	*	1.36	0.56	2.24	-1.68	0.0146	0.0492	Distal Intergenic	17	52822831	52921237	98407	1	170454	NM_131896	-79526	ENSDARG00000098240	meis2a	Meis homeobox 2a
chr1	1987303	1987509	207	*	2.16	2.53	0.91	1.62	0.0146	0.0492	Distal Intergenic	1	2025085	2027100	2016	1	100004287	NM_001159837	-37576	ENSDARG00000010376	slc5a3a	solute carrier family 5 member 3a
chr3	37785744	37785949	206	*	3.82	4.12	2.97	1.15	0.0146	0.0492	Promoter (<=1kb)	3	37776493	37785837	9345	2	58081	NM_131562	0	ENSDARG00000020623	baxa	BCL2 associated X, apoptosis regulator a
chr13	32681737	32681968	232	*	2.37	1.77	3.11	-1.34	0.0146	0.0492	Intron (NM_001002351/436624, intron 2 of 7)	13	32660549	32726178	65630	2	436624	NM_001002351	44210	ENSDARG00000012563	pdss2	prenyl (decaprenyl) diphosphate synthase, subunit 2
chr16	39548485	39548707	223	*	0.96	0.12	1.88	-1.76	0.0146	0.0492	Intron (NM_182855/30739, intron 3 of 7)	16	39505166	39570831	65666	2	30739	NM_182855	22124	ENSDARG00000034541	tgfbr2b	transforming growth factor beta receptor 2b
chr21	31584329	31584444	116	*	1.34	0.58	2.2	-1.62	0.0146	0.0492	Distal Intergenic	21	31253180	31274479	21300	1	393423	NM_200451	331149	ENSDARG00000033361	asl	argininosuccinate lyase
chr24	37771522	37771641	120	*	1.44	0.69	2.3	-1.6	0.0146	0.0492	Intron (NM_001328521/573631, intron 5 of 12)	24	37722048	37794593	72546	1	573631	NM_001328521	49474	ENSDARG00000016490	rab11fip3	RAB11 family interacting protein 3 (class II)
chr5	65921420	65921787	368	*	3.82	4.19	2.59	1.6	0.0146	0.0492	Distal Intergenic	5	65946222	65954173	7952	1	415178	NM_001002088	-24435	ENSDARG00000103988	mymk	myomaker, myoblast fusion factor
chr18	14678228	14678395	168	*	1.75	2.11	0.55	1.56	0.0146	0.0492	Promoter (<=1kb)	18	14671789	14677936	6148	2	560780	NM_001099999	-292	ENSDARG00000078847	si:dkey-238o13.4	si:dkey-238o13.4
chr2	8111692	8111845	154	*	3.38	3.69	2.39	1.3	0.0146	0.0492	Promoter (<=1kb)	2	8112449	8114608	2160	1	561896	NM_001079995	-604	ENSDARG00000075007	chst2a	carbohydrate (N-acetylglucosamine-6-O) sulfotransferase 2a
chr20	33208950	33209396	447	*	3.99	4.29	3.11	1.18	0.0146	0.0492	Distal Intergenic	20	33175190	33189652	14463	1	556790	NM_001197324	33760	ENSDARG00000032117	ddx1	DEAD (Asp-Glu-Ala-Asp) box helicase 1
chr7	35316535	35316654	120	*	2.91	2.21	3.73	-1.51	0.0146	0.0492	Distal Intergenic	7	35229738	35242270	12533	1	393825	NM_201335	86797	ENSDARG00000030463	tppp3	tubulin polymerization-promoting protein family member 3
chr22	7255596	7256009	414	*	2.99	2.51	3.65	-1.14	0.0146	0.0492	Distal Intergenic	22	7044621	7168571	123951	2	407672	NM_214791	-87025	ENSDARG00000101866	asic1b	acid-sensing (proton-gated) ion channel 1b
chr19	428834	429156	323	*	4.24	3.68	4.96	-1.29	0.0145	0.0487	Promoter (2-3kb)	19	420442	432083	11642	2	393647	NM_200674	2927	ENSDARG00000099528	dus3l	dihydrouridine synthase 3-like (S. cerevisiae)
chr17	3985886	3986071	186	*	1.72	1.07	2.51	-1.44	0.0145	0.0487	Distal Intergenic	17	3993772	4017950	24179	1	792311	NM_001030159	-7701	ENSDARG00000101512	tmx4	thioredoxin-related transmembrane protein 4
chr13	42154741	42154983	243	*	2.63	2.95	1.66	1.29	0.0145	0.0487	Distal Intergenic	13	42124568	42143625	19058	1	447829	NM_001004568	30173	ENSDARG00000052783	cdc42ep3	CDC42 effector protein (Rho GTPase binding) 3
chr14	37729326	37729501	176	*	4.12	3.39	4.96	-1.57	0.0145	0.0487	Distal Intergenic	14	36885524	36887063	1540	1	567278	NM_001048055	843802	ENSDARG00000033227	lect2l	leukocyte cell-derived chemotaxin 2 like
chr14	37650033	37650340	308	*	2.41	1.78	3.19	-1.4	0.0145	0.0488	Distal Intergenic	14	36885524	36887063	1540	1	567278	NM_001048055	764509	ENSDARG00000033227	lect2l	leukocyte cell-derived chemotaxin 2 like
chr19	47365436	47365699	264	*	2.97	3.36	1.58	1.77	0.0145	0.0488	Distal Intergenic	19	47405912	47423628	17717	1	436882	NM_001002609	-40213	ENSDARG00000031511	psmb2	proteasome 20S subunit beta 2
chr9	26285503	26285624	122	*	1.76	1.07	2.58	-1.51	0.0145	0.0488	Distal Intergenic	9	26103814	26123706	19893	1	30219	NM_131023	181689	ENSDARG00000020164	efnb2a	ephrin-B2a
chr18	33732359	33732566	208	*	1.6	0.93	2.4	-1.47	0.0145	0.0488	Distal Intergenic	18	33818577	33821891	3315	1	100003908	NM_001083877	-86011	ENSDARG00000068566	olfcq19	olfactory receptor C family, q19
chr7_KZ115240v1_alt	99955	100074	120	*	2.21	1.34	3.15	-1.81	0.0145	0.0488	Distal Intergenic	343	286869	286949	81	1	100033677	NR_030097	-186795	ENSDARG00000080551	mir153a	microRNA 153a
chr4	20711543	20711662	120	*	1.48	0.68	2.36	-1.68	0.0145	0.0488	Distal Intergenic	4	20812997	20986812	173816	1	567779	NM_001045143	-101335	ENSDARG00000005476	nav3	neuron navigator 3
chr7	30845964	30846074	111	*	1.16	0.29	2.09	-1.8	0.0145	0.0488	Distal Intergenic	7	30779785	30783043	3259	1	553804	NM_001020766	66179	ENSDARG00000045428	mcee	methylmalonyl CoA epimerase
chr20	34732868	34732987	120	*	2.18	1.22	3.15	-1.93	0.0145	0.0488	Intron (NM_001015044/394236, intron 2 of 2)	20	34717514	34734002	16489	1	394236	NM_001015044	15354	ENSDARG00000024189	pnocb	prepronociceptin b
chr3	44141307	44141426	120	*	2.1	1.5	2.86	-1.36	0.0145	0.0488	Distal Intergenic	3	44081620	44094276	12657	2	436936	NM_001109869	-47031	ENSDARG00000102512	kdm8	lysine (K)-specific demethylase 8
chr1	53160910	53161487	578	*	4.11	4.42	3.21	1.21	0.0145	0.0488	Distal Intergenic	1	53234694	53259746	25053	2	654826	NM_001039565	98259	ENSDARG00000052361	il15	interleukin 15
chr16	29590570	29590798	229	*	3.44	3.79	2.32	1.47	0.0145	0.0488	Distal Intergenic	16	29586004	29587314	1311	1	373102	NM_194394	4566	ENSDARG00000008363	mcl1b	MCL1 apoptosis regulator, BCL2 family member b
chr5	33796921	33797099	179	*	0.99	0.07	1.95	-1.88	0.0145	0.0488	Exon (NM_001122857/558237, exon 2 of 16)	5	33679559	33825465	145907	2	558237	NM_001122857	28366	ENSDARG00000075110	dab2ipb	DAB2 interacting protein b
chr16	14050770	14050952	183	*	1.74	1.07	2.55	-1.47	0.0145	0.0488	Distal Intergenic	16	14064400	14074594	10195	2	723998	NM_001045303	23642	ENSDARG00000062429	trim109	tripartite motif containing 109
chr4	21875482	21875615	134	*	2.35	1.65	3.16	-1.51	0.0145	0.0488	Distal Intergenic	4	21752371	21851473	99103	2	393682	NM_200709	-24009	ENSDARG00000013414	lin7a	lin-7 homolog A (C. elegans)
chr15	38696627	38696814	188	*	1.93	1.23	2.74	-1.51	0.0145	0.0488	Distal Intergenic	15	38859648	39228226	368579	1	60309	NM_131633	-162834	ENSDARG00000014891	robo2	roundabout, axon guidance receptor, homolog 2 (Drosophila)
chr20	5842154	5842336	183	*	2.23	2.65	0.59	2.05	0.0145	0.0488	Intron (NM_001080047/570698, intron 14 of 19)	20	5563042	5966306	403265	1	570698	NM_001080047	279112	ENSDARG00000062693	nrxn3b	neurexin 3b
chr9	34258566	34258934	369	*	3.72	4.03	2.8	1.23	0.0145	0.0488	Promoter (1-2kb)	9	34246385	34260191	13807	2	492719	NM_001089356	1257	ENSDARG00000002305	me3	malic enzyme 3, NADP(+)-dependent, mitochondrial
chr15	35918285	35918716	432	*	4.02	4.32	3.11	1.21	0.0145	0.0488	Distal Intergenic	15	35933094	35944902	11809	1	550277	NM_001017614	-14378	ENSDARG00000021046	rhbdd1	rhomboid domain containing 1
chr2	30983125	30983472	348	*	3.27	3.65	1.97	1.68	0.0145	0.0488	Distal Intergenic	2	30916188	30959913	43726	1	558671	NM_001161340	66937	ENSDARG00000061249	myom1a	myomesin 1a (skelemin)
chr5	34487772	34488056	285	*	6.17	5.92	6.57	-0.65	0.0145	0.0488	Distal Intergenic	5	34549417	34575502	26086	1	321033	NM_198870	-61361	ENSDARG00000009336	aif1l	allograft inflammatory factor 1-like
chr4	54661364	54661521	158	*	1.57	0.73	2.49	-1.76	0.0145	0.0488	Distal Intergenic	4	54486676	54489069	2394	1	100008037	NM_001128300	174688	ENSDARG00000102215	si:ch211-227e10.6	si:ch211-227e10.6
chr20	52275623	52275736	114	*	1.01	0.04	2	-1.95	0.0145	0.0488	Exon (NM_200890/393864, exon 12 of 13)	20	52273449	52314337	40889	2	393864	NM_200890	38601	ENSDARG00000027930	naprt	nicotinate phosphoribosyltransferase
chr8	51737276	51737721	446	*	4.09	3.62	4.72	-1.1	0.0145	0.0488	Exon (NM_131058/30264, exon 9 of 9)	8	51736296	51753588	17293	2	30264	NM_131058	15867	ENSDARG00000007329	tbx16	T-box transcription factor 16
chr10	41143607	41143727	121	*	1.73	2.1	0.46	1.65	0.0145	0.0488	Distal Intergenic	10	41159399	41192883	33485	1	353362	NM_181764	-15672	ENSDARG00000036456	anxa4	annexin A4
chr12	23889028	23889344	317	*	3.23	3.56	2.21	1.35	0.0145	0.0488	Intron (NM_001035261/30112, intron 10 of 37)	12	23812531	23932576	120046	1	30112	NM_001035261	76497	ENSDARG00000055075	svila	supervillin a
chr17	3637113	3637317	205	*	2.02	1.33	2.83	-1.5	0.0145	0.0488	Distal Intergenic	17	3391326	3568940	177615	1	569320	NM_001126427	245787	ENSDARG00000101660	sntg2	syntrophin, gamma 2
chr20	40521710	40521914	205	*	2.42	2.78	1.26	1.52	0.0145	0.0488	Distal Intergenic	20	40475576	40487208	11633	2	140427	NM_131867	-34502	ENSDARG00000053097	hsf2	heat shock transcription factor 2
chr18	15939543	15940092	550	*	3.45	2.86	4.19	-1.33	0.0145	0.0488	Distal Intergenic	18	15887830	15932502	44673	2	562798	NM_001328211	-7041	ENSDARG00000062855	plekhg7	pleckstrin homology domain containing, family G (with RhoGef domain) member 7
chr11	11149104	11149549	446	*	4.22	4.53	3.28	1.25	0.0145	0.0488	Distal Intergenic	11	11201190	11260855	59666	1	334269	NM_001346203	-51641	ENSDARG00000075433	myom2a	myomesin 2a
chr17	29975693	29975846	154	*	1.15	0.34	2.05	-1.71	0.0145	0.0488	Distal Intergenic	17	29798216	29877336	79121	2	405890	NM_212954	-98357	ENSDARG00000004861	esrrga	estrogen-related receptor gamma a
chr7	34552851	34553070	220	*	2.87	3.24	1.62	1.62	0.0145	0.0488	Distal Intergenic	7	34496087	34506090	10004	2	553441	NM_001327746	-46761	ENSDARG00000010586	tex9	testis expressed 9
chr8	49605854	49606168	315	*	3.73	4.06	2.72	1.34	0.0145	0.0488	Distal Intergenic	8	49478026	49499457	21432	2	100000387	NM_001316946	-106397	ENSDARG00000068124	opn7d	opsin 7, group member d
chr24	12732677	12732930	254	*	4.43	4.71	3.6	1.12	0.0145	0.0488	Exon (NM_001040378/678633, exon 17 of 18)	24	12690163	12734581	44419	1	678633	NM_001040378	42514	ENSDARG00000069260	rec8b	REC8 meiotic recombination protein b
chr23	5341576	5341807	232	*	2.83	3.16	1.78	1.38	0.0145	0.0488	Distal Intergenic	23	5431196	5431319	124	2	100033537	NR_039088	89512	ENSDARG00000080890	mirlet7a-5	microRNA let7a-5
chr20	32456143	32456428	286	*	2.08	1.38	2.9	-1.52	0.0145	0.0488	Distal Intergenic	20	32437398	32446396	8999	2	445214	NM_001003608	-9747	ENSDARG00000017107	nr2e1	nuclear receptor subfamily 2, group E, member 1
chr22	9022416	9022733	318	*	3.24	3.62	1.86	1.76	0.0145	0.0488	Distal Intergenic	22	9472814	9513059	40246	1	568759	NM_001089420	-450081	ENSDARG00000078169	cacna2d2b	calcium channel, voltage-dependent, alpha 2/delta subunit 2b
chr13_KZ115414v1_alt	141715	141857	143	*	1.35	1.79	-0.4	2.19	0.0145	0.0488	Intron (NM_001145606/570926, intron 2 of 4)	562	126269	159236	32968	2	570926	NM_001145606	17379	ENSDARG00000074597	lzts2a	leucine zipper, putative tumor suppressor 2a
chr20	16310405	16310793	389	*	2.49	1.91	3.22	-1.31	0.0145	0.0488	Distal Intergenic	20	16205082	16223127	18046	2	338247	NM_212788	-87278	ENSDARG00000016607	echdc2	enoyl CoA hydratase domain containing 2
chr4	18165280	18165799	520	*	4.29	4.63	3.18	1.45	0.0145	0.0488	Intron (NM_001100017/565408, intron 1 of 25)	4	17888159	18201411	313253	2	565408	NM_001100017	35612	ENSDARG00000003512	anks1b	ankyrin repeat and sterile alpha motif domain containing 1B
chr12	47081518	47081907	390	*	3.53	3.86	2.48	1.39	0.0145	0.0488	Promoter (<=1kb)	12	47081695	47116074	34380	1	378847	NM_198072	0	ENSDARG00000104906	mtr	5-methyltetrahydrofolate-homocysteine methyltransferase
chr13	26356787	26357143	357	*	3.17	3.49	2.17	1.33	0.0145	0.0488	Distal Intergenic	13	26552991	26703810	150820	2	103912006	NR_145709	346667	ENSDARG00000093327	si:rp71-1h3.1	si:rp71-1h3.1
chr2	22990914	22991054	141	*	2.61	2.98	1.36	1.62	0.0145	0.0488	Promoter (2-3kb)	2	22970141	22993624	23484	2	678639	NM_001040384	2570	ENSDARG00000031709	mllt1b	MLLT1 super elongation complex subunit b
chr22	18033584	18033714	131	*	6.02	5.77	6.41	-0.63	0.0145	0.0488	Distal Intergenic	22	18156000	18160283	4284	1	724051	NM_001045327	-122286	ENSDARG00000056162	nr2c2ap	nuclear receptor 2C2-associated protein
chr16	43936024	43936143	120	*	2.32	1.53	3.2	-1.68	0.0145	0.0488	Intron (NM_001039635/568996, intron 4 of 7)	16	43819512	44127387	307876	2	568996	NM_001039635	191244	ENSDARG00000040123	zfpm2a	zinc finger protein, FOG family member 2a
chr8	35526518	35526618	101	*	1.04	1.47	-0.66	2.13	0.0145	0.0489	Distal Intergenic	8	35809055	35961008	151954	2	393932	NM_001320529	434390	ENSDARG00000102612	slc15a4	solute carrier family 15 member 4
chr8	52336438	52336591	154	*	1.36	0.55	2.26	-1.71	0.0145	0.0489	Intron (NM_001020700/553729, intron 8 of 12)	8	52314610	52350358	35749	1	553729	NM_001020700	21828	ENSDARG00000016016	dbnlb	drebrin-like b
chr4	27423253	27423424	172	*	1.11	0.23	2.04	-1.81	0.0145	0.0489	Distal Intergenic	4	27113278	27117027	3750	2	100000808	NM_001082941	-306226	ENSDARG00000024306	zbed4	zinc finger, BED-type containing 4
chr7	24133122	24133295	174	*	1.04	0.18	1.96	-1.78	0.0145	0.0489	Exon (NM_194416/373882, exon 4 of 10)	7	24124298	24149631	25334	2	373882	NM_194416	16336	ENSDARG00000002235	mmp14a	matrix metallopeptidase 14a (membrane-inserted)
chr16	41481037	41481245	209	*	2.31	2.7	0.93	1.77	0.0145	0.0489	Intron (NM_001044756/368348, intron 2 of 4)	16	41468529	41488023	19495	2	368348	NM_001044756	6778	ENSDARG00000099631	cmtm6	CKLF-like MARVEL transmembrane domain containing 6
chr7	26750212	26750674	463	*	2.51	1.99	3.2	-1.2	0.0145	0.0489	Distal Intergenic	7	26763008	26837158	74151	1	437007	NM_001002734	-12334	ENSDARG00000056656	tspan18a	tetraspanin 18a
chr4	6814527	6814646	120	*	1.69	0.91	2.56	-1.66	0.0145	0.0489	Distal Intergenic	4	6799801	6809278	9478	2	555178	NM_001076555	-5249	ENSDARG00000068708	ifrd1	interferon-related developmental regulator 1
chr5	51878395	51878594	200	*	3.6	3.89	2.74	1.15	0.0145	0.0489	Exon (NM_001079985/560687, exon 12 of 13)	5	51848841	51881422	32582	1	560687	NM_001079985	29554	ENSDARG00000061379	cmya5	cardiomyopathy associated 5
chr8	912428	912857	430	*	4.63	4.14	5.28	-1.14	0.0145	0.0489	Promoter (<=1kb)	8	902753	912821	10069	2	562469	NM_001039629	0	ENSDARG00000059236	ptger4a	prostaglandin E receptor 4 (subtype EP4) a
chr7	20384242	20384494	253	*	4.08	4.38	3.22	1.16	0.0145	0.0489	Distal Intergenic	7	20344634	20369865	25232	1	567858	NM_001327748	39608	ENSDARG00000090444	ponzr1	plac8 onzin related protein 1
chr5	43401125	43401358	234	*	1.98	1.32	2.77	-1.45	0.0145	0.0489	Distal Intergenic	5	43427891	43509101	81211	1	553415	NM_001099974	-26533	ENSDARG00000016868	rhobtb4	Rho related BTB domain containing 4
chr10	239328	239541	214	*	4.24	3.56	5.04	-1.49	0.0145	0.0489	Distal Intergenic	10	213903	227518	13616	1	555163	NM_001257340	25425	ENSDARG00000059048	mpzl1l	myelin protein zero-like 1 like
chr21	45928727	45928868	142	*	1.37	0.64	2.22	-1.58	0.0145	0.0489	Distal Intergenic	21	45905044	45919161	14118	1	799908	NM_001308558	23683	ENSDARG00000094112	slc22a21	solute carrier family 22 member 21
chr21	34968899	34969022	124	*	2.48	1.89	3.22	-1.33	0.0145	0.0489	Intron (NM_001003499/445105, intron 1 of 10)	21	34945033	34972755	27723	2	445105	NM_001003499	3733	ENSDARG00000007108	lipia	lipase, member Ia
chr15	6838730	6839037	308	*	2.72	2.18	3.43	-1.25	0.0145	0.0489	3' UTR	15	6838071	6863317	25247	2	81885	NM_131778	24280	ENSDARG00000002795	meis3	myeloid ecotropic viral integration site 3
chr7	41929531	41929833	303	*	3.08	2.44	3.86	-1.42	0.0145	0.0489	Distal Intergenic	7	41903545	41916505	12961	2	406814	NM_213493	-13026	ENSDARG00000104066	dnaja2a	DnaJ heat shock protein family (Hsp40) member A2a
chr21	38044733	38045066	334	*	1.51	0.76	2.37	-1.61	0.0145	0.0489	Intron (NM_001080003/562805, intron 1 of 5)	21	38033391	38110953	77563	1	562805	NM_001080003	11342	ENSDARG00000060661	klf8	Kruppel-like factor 8
chr1	4442020	4442403	384	*	2.48	1.97	3.15	-1.19	0.0145	0.0489	Distal Intergenic	1	4101741	4154332	52592	1	324096	NM_001305553	340279	ENSDARG00000098769	slitrk6	SLIT and NTRK-like family, member 6
chr11	40032678	40033019	342	*	3.71	4	2.88	1.12	0.0145	0.0489	Promoter (2-3kb)	11	40024181	40030112	5932	2	402853	NM_205591	-2566	ENSDARG00000017340	uts2b	urotensin 2, beta
chr11	8886616	8886835	220	*	1.52	0.77	2.37	-1.6	0.0145	0.0489	Distal Intergenic	11	8565828	8674470	108643	1	553608	NM_001020583	320788	ENSDARG00000058696	tbl1xr1a	transducin (beta)-like 1 X-linked receptor 1a
chr9	56419760	56420052	293	*	3.82	4.12	2.93	1.18	0.0145	0.0489	Promoter (<=1kb)	9	56411781	56419668	7888	2	406250	NM_001003944	-92	ENSDARG00000091138	actr3	actin related protein 3
chr7	58979142	58979264	123	*	3.05	2.52	3.73	-1.21	0.0145	0.0489	Distal Intergenic	7	59021015	59031039	10025	1	553326	NM_001327864	-41751	ENSDARG00000103744	hacd1	3-hydroxyacyl-CoA dehydratase 1
chr23	20176925	20177699	775	*	6.49	6.72	5.88	0.84	0.0145	0.0489	Downstream (2-3kb)	23	20127883	20133982	6100	2	450033	NM_001006054	-42943	ENSDARG00000006174	lrrc23	leucine rich repeat containing 23
chr18	48038210	48038564	355	*	3.73	4	2.93	1.08	0.0145	0.0489	Distal Intergenic	18	48168695	48178130	9436	1	572522	NM_001037706	-130131	ENSDARG00000038191	smtla	somatolactin alpha
chr21	11853218	11853406	189	*	2.73	3.1	1.45	1.65	0.0145	0.0489	Promoter (2-3kb)	21	11845241	11855828	10588	2	436873	NM_001002600	2422	ENSDARG00000058740	ube2r2	ubiquitin-conjugating enzyme E2R 2
chr1	19274199	19274319	121	*	2.78	2	3.66	-1.66	0.0145	0.0489	Distal Intergenic	1	19205211	19233890	28680	2	100073332	NM_001098769	-40309	ENSDARG00000019945	ptprdb	protein tyrosine phosphatase receptor type Db
chr1	58764050	58764255	206	*	2.82	2.33	3.48	-1.15	0.0145	0.0489	Distal Intergenic	1	58840889	58850696	9808	1	791158	NM_001080640	-76634	ENSDARG00000017255	tmed1b	transmembrane p24 trafficking protein 1b
chr18	40600522	40600648	127	*	1.73	2.12	0.35	1.77	0.0145	0.0489	Exon (NM_001082950/100002232, exon 10 of 14)	18	40584288	40604363	20076	1	100002232	NM_001082950	16234	ENSDARG00000068363	si:ch211-132b12.3	si:ch211-132b12.3
chr4	75203804	75204196	393	*	2.39	1.84	3.1	-1.25	0.0145	0.0489	Distal Intergenic	4	75013307	75047192	33886	2	446213	NM_001004537	-156612	ENSDARG00000005126	large1	LARGE xylosyl- and glucuronyltransferase 1
chr18	29190649	29190772	124	*	3	2.24	3.86	-1.61	0.0145	0.0489	Distal Intergenic	18	29402612	29405644	3033	1	114467	NM_131844	-211840	ENSDARG00000015890	mafa	v-maf avian musculoaponeurotic fibrosarcoma oncogene homolog a (paralog a)
chr16	4714643	4714819	177	*	1.91	1.23	2.73	-1.5	0.0145	0.0489	Exon (NM_001328556/564392, exon 6 of 8)	16	4710620	4721744	11125	2	564392	NM_001328556	6925	ENSDARG00000010130	smpdl3b	sphingomyelin phosphodiesterase acid like 3B
chr21	14525204	14525373	170	*	1.13	1.56	-0.66	2.22	0.0145	0.0489	Distal Intergenic	21	14696663	14763023	66361	2	570029	NM_001365234	237650	ENSDARG00000079839	arrdc1b	arrestin domain containing 1b
chr24	29436246	29436588	343	*	3.5	3.85	2.35	1.5	0.0145	0.0489	Distal Intergenic	24	29352039	29353520	1482	1	448867	NM_001163988	84207	ENSDARG00000069706	prmt6	protein arginine methyltransferase 6
chr16	39535104	39535294	191	*	1.76	1.04	2.6	-1.56	0.0145	0.0489	Exon (NM_182855/30739, exon 4 of 8)	16	39505166	39570831	65666	2	30739	NM_182855	35537	ENSDARG00000034541	tgfbr2b	transforming growth factor beta receptor 2b
chr20	32431971	32432155	185	*	1.15	0.28	2.08	-1.8	0.0145	0.0489	3' UTR	20	32406056	32432871	26816	1	563511	NM_001037106	25915	ENSDARG00000008678	snx3	sorting nexin 3
chr7	39854130	39854423	294	*	2.22	1.56	3.02	-1.46	0.0145	0.0489	Distal Intergenic	7	39744244	39751529	7286	2	559037	NM_001037384	-102601	ENSDARG00000010021	grpel1	GrpE-like 1, mitochondrial
chr8	19849117	19849757	641	*	4.57	4.87	3.69	1.17	0.0145	0.0489	Intron (NM_001270477/566028, intron 2 of 6)	8	19802466	19903955	101490	2	566028	NM_001270477	54198	ENSDARG00000088816	trabd2b	TraB domain containing 2B
chr14	48608912	48609357	446	*	3.5	3.87	2.19	1.68	0.0145	0.049	Distal Intergenic	14	48740531	48765262	24732	2	560386	NM_001110028	155905	ENSDARG00000101072	cnot6b	CCR4-NOT transcription complex, subunit 6b
chr14	42817505	42817844	340	*	3.51	3.91	2.09	1.82	0.0145	0.049	Distal Intergenic	14	42978695	43000836	22142	2	360138	NM_182885	182992	ENSDARG00000102824	pcdh10b	protocadherin 10b
chr22	6477590	6477751	162	*	2.03	2.4	0.72	1.68	0.0145	0.049	Distal Intergenic	22	6456005	6465060	9056	2	100003819	NM_001128291	-12530	ENSDARG00000075248	zgc:172133	zgc:172133
chr1	10966355	10966775	421	*	2.75	2.24	3.43	-1.18	0.0145	0.049	Exon (NM_001326687/83773, exon 23 of 78)	1	10824351	11075405	251055	2	83773	NM_001326687	108630	ENSDARG00000008487	dmd	dystrophin
chr16	46820080	46820233	154	*	1.85	1.18	2.64	-1.46	0.0145	0.049	Distal Intergenic	16	46791221	46794172	2952	1	100535095	NR_138558	28859	NA	LOC100535095	uncharacterized LOC100535095
chr13	29833984	29834104	121	*	1.69	0.95	2.54	-1.6	0.0145	0.049	Distal Intergenic	13	29770959	29803764	32806	1	30425	NM_131184	63025	ENSDARG00000028148	pax2a	paired box 2a
chr25	8524164	8524555	392	*	5.23	5.5	4.44	1.07	0.0145	0.049	Distal Intergenic	25	8551240	8551340	101	2	100033556	NR_029997	26785	ENSDARG00000080594	mir9-3	microRNA 9-3
chr12	1121326	1121677	352	*	3.35	3.68	2.32	1.36	0.0145	0.049	Distal Intergenic	12	1072485	1085227	12743	2	102216265	NM_001284432	-36099	ENSDARG00000105301	sox8a	SRY-box transcription factor 8a
chr17	39526795	39527051	257	*	1.99	1.25	2.84	-1.59	0.0145	0.049	Distal Intergenic	17	39697621	39739994	42374	1	562037	NM_001288652	-170570	ENSDARG00000060494	eprs1	glutamyl-prolyl-tRNA synthetase 1
chr3	57938361	57938605	245	*	1.49	0.74	2.34	-1.6	0.0145	0.049	Distal Intergenic	3	57949120	57979190	30071	1	570510	NM_001161654	-10515	ENSDARG00000031126	notum1a	notum, palmitoleoyl-protein carboxylesterase a
chr12	37330444	37330595	152	*	1.46	1.88	-0.18	2.06	0.0145	0.049	Distal Intergenic	12	37275333	37299671	24339	2	678607	NM_001040355	-30773	ENSDARG00000060457	pmp22b	peripheral myelin protein 22b
chr14	48057003	48057123	121	*	2.08	1.45	2.85	-1.39	0.0145	0.049	Intron (NM_001002065/415155, intron 5 of 9)	14	48045193	48065365	20173	1	415155	NM_001002065	11810	ENSDARG00000038835	ppid	peptidylprolyl isomerase D
chr9	2016954	2017119	166	*	2.88	3.19	1.92	1.27	0.0145	0.049	Distal Intergenic	9	2020821	2045512	24692	1	326761	NM_199480	-3702	ENSDARG00000115902	lnpa	limb and neural patterns a
chr13	43447277	43447722	446	*	2.49	1.88	3.25	-1.38	0.0145	0.049	Distal Intergenic	13	43400400	43407199	6800	1	337795	NM_001077794	46877	ENSDARG00000056986	dact2	dishevelled-binding antagonist of beta-catenin 2
chr16	27747797	27748190	394	*	2.41	1.86	3.12	-1.26	0.0145	0.049	Promoter (<=1kb)	16	27734871	27749172	14302	2	550429	NM_001017734	982	ENSDARG00000055901	steap4	STEAP family member 4
chr20	39106412	39106788	377	*	2.7	2.13	3.43	-1.31	0.0145	0.049	Intron (NM_001320228/407988, intron 2 of 4)	20	39053466	39188476	135011	2	407988	NM_001320228	81688	ENSDARG00000021869	rcan2	regulator of calcineurin 2
chr25	8506929	8507127	199	*	1.92	1.22	2.74	-1.52	0.0145	0.049	Distal Intergenic	25	8551240	8551340	101	2	100033556	NR_029997	44213	ENSDARG00000080594	mir9-3	microRNA 9-3
chr11	19523357	19523770	414	*	3.26	2.78	3.9	-1.12	0.0145	0.049	Distal Intergenic	11	19502367	19511548	9182	1	393261	NM_200291	20990	ENSDARG00000070674	psmd6	proteasome 26S subunit, non-ATPase 6
chr4	5839990	5840112	123	*	1.24	0.48	2.1	-1.62	0.0145	0.049	Exon (NM_199920/334644, exon 4 of 5)	4	5835442	5840625	5184	1	334644	NM_199920	4548	ENSDARG00000073858	pex26	peroxisomal biogenesis factor 26
chr23	22982871	22983266	396	*	4.37	3.7	5.16	-1.47	0.0145	0.049	Distal Intergenic	23	23126130	23179417	53288	2	58013	NM_001003830	196151	ENSDARG00000001754	noc2l	NOC2-like nucleolar associated transcriptional repressor
chr13	30069341	30069554	214	*	3.05	3.43	1.73	1.7	0.0144	0.0485	Distal Intergenic	13	30035407	30044381	8975	1	324005	NM_212659	33934	ENSDARG00000039363	dnajb12a	DnaJ heat shock protein family (Hsp40) member B12a
chr25	31159328	31159736	409	*	2.78	2.14	3.56	-1.42	0.0144	0.0485	Distal Intergenic	25	31175696	31193780	18085	1	103909874	NM_001365289	-15960	NA	syt8	synaptotagmin VIII
chr21	29192895	29193082	188	*	2.03	1.38	2.82	-1.45	0.0144	0.0485	Distal Intergenic	21	29102392	29110171	7780	2	436707	NM_001002434	-82724	ENSDARG00000040178	havcr1	hepatitis A virus cellular receptor 1
chr20	44515637	44515841	205	*	3.67	3.99	2.67	1.32	0.0144	0.0485	Intron (NM_001365964/566968, intron 11 of 14)	20	44509271	44557005	47735	2	566968	NM_001365964	41164	ENSDARG00000030263	mfsd2b	major facilitator superfamily domain containing 2B
chr20_KZ115614v1_alt	153816	153935	120	*	2.29	1.46	3.2	-1.74	0.0144	0.0485	Distal Intergenic	799	213518	244569	31052	1	562846	NM_001025524	-59583	ENSDARG00000041402	zc3h14	zinc finger CCCH-type containing 14
chr16	14823736	14823969	234	*	3.71	2.9	4.6	-1.7	0.0144	0.0485	Distal Intergenic	16	14588148	14675909	87762	1	768177	NM_001077320	235588	ENSDARG00000040930	deptor	DEP domain containing MTOR-interacting protein
chr14	20117962	20118146	185	*	2.12	1.53	2.85	-1.32	0.0144	0.0485	Distal Intergenic	14	20156584	20189279	32696	1	259191	NM_152963	-38438	ENSDARG00000037433	fmr1	FMRP translational regulator 1
chr19	40562259	40562378	120	*	3.93	3.55	4.48	-0.93	0.0144	0.0485	Intron (NM_001365104/100034394, intron 19 of 28)	19	40379766	40687805	308040	1	100034394	NM_001365104	182493	ENSDARG00000002880	vps50	VPS50 EARP/GARPII complex subunit
chr3	42109047	42109209	163	*	1.65	0.9	2.52	-1.62	0.0144	0.0485	Exon (NM_001326490/555448, exon 10 of 13)	3	42090418	42120172	29755	1	555448	NM_001326490	18629	ENSDARG00000074842	snx8a	sorting nexin 8a
chr23	45398586	45398808	223	*	2.86	2.24	3.62	-1.37	0.0144	0.0485	Promoter (<=1kb)	23	45304828	45398622	93795	2	445247	NM_001003641	0	ENSDARG00000036897	sgms2b	sphingomyelin synthase 2b
chr17	7754333	7754623	291	*	2.52	2.91	1.13	1.79	0.0144	0.0485	Distal Intergenic	17	7727464	7732865	5402	2	405846	NM_212910	-21468	ENSDARG00000044039	stx11a	syntaxin 11a
chr3	57928121	57928358	238	*	1.59	0.82	2.46	-1.63	0.0144	0.0485	Distal Intergenic	3	57949120	57979190	30071	1	570510	NM_001161654	-20762	ENSDARG00000031126	notum1a	notum, palmitoleoyl-protein carboxylesterase a
chr20	12530763	12530873	111	*	1.26	0.35	2.22	-1.87	0.0144	0.0485	Distal Intergenic	20	12702956	12722349	19394	1	751751	NM_001045461	-172083	ENSDARG00000100439	zgc:153383	zgc:153383
chr22	34774049	34774409	361	*	2.86	3.17	1.94	1.23	0.0144	0.0485	Distal Intergenic	22	34710473	34733026	22554	1	405806	NM_212870	63576	ENSDARG00000018944	hoga1	4-hydroxy-2-oxoglutarate aldolase 1
chr7	17974420	17974540	121	*	1.75	1.04	2.59	-1.55	0.0144	0.0485	Distal Intergenic	7	17953641	17970923	17283	1	557363	NM_001199722	20779	ENSDARG00000079684	taf6l	TAF6-like RNA polymerase II, p300/CBP-associated factor (PCAF)-associated factor
chr14	14398351	14398727	377	*	2.88	3.26	1.55	1.71	0.0144	0.0485	Intron (NM_001166332/562702, intron 2 of 4)	14	14315078	14532861	217784	1	562702	NM_001166332	83273	ENSDARG00000104786	nlgn3a	neuroligin 3a
chr9	44103138	44103457	320	*	3.69	3.04	4.48	-1.44	0.0144	0.0485	Intron (NM_001089474/100037318, intron 11 of 12)	9	44094314	44289636	195323	2	100037318	NM_001089474	186179	ENSDARG00000079397	cerkl	ceramide kinase-like
chr7	1405152	1405551	400	*	3.69	3.2	4.35	-1.15	0.0144	0.0485	Distal Intergenic	7	1457379	1468521	11143	1	402956	NM_205658	-51828	ENSDARG00000039268	emc4	ER membrane protein complex subunit 4
chr18	860336	860621	286	*	2.81	3.16	1.66	1.5	0.0144	0.0485	Distal Intergenic	18	887124	898873	11750	2	436810	NM_001002537	38252	ENSDARG00000042703	parp6a	poly (ADP-ribose) polymerase family, member 6a
chr1	56157776	56157979	204	*	1.54	0.74	2.43	-1.69	0.0144	0.0485	Exon (NM_131242/321046, exon 19 of 41)	1	56130222	56176970	46749	2	321046	NM_131242	18991	ENSDARG00000012694	c3a.1	complement component c3a, duplicate 1
chr7	18968205	18968358	154	*	1.42	0.7	2.26	-1.56	0.0144	0.0485	Distal Intergenic	7	18989241	18990075	835	1	561367	NM_001128708	-20883	ENSDARG00000057142	zgc:194252	zgc:194252
chr1	39122001	39122287	287	*	2.48	1.87	3.23	-1.36	0.0144	0.0485	Distal Intergenic	1	38850836	38908197	57362	2	403049	NM_205734	-213804	ENSDARG00000069640	vegfc	vascular endothelial growth factor c
chr21	24101521	24101640	120	*	2.21	1.36	3.13	-1.76	0.0144	0.0485	Intron (NM_001113551/569931, intron 1 of 11)	21	23953179	24412427	459249	1	569931	NM_001113551	148342	ENSDARG00000031075	cadm1a	cell adhesion molecule 1a
chr19	10332688	10332809	122	*	2.97	3.34	1.75	1.59	0.0144	0.0485	Promoter (1-2kb)	19	10331357	10332947	1591	1	100034506	NM_001083074	1331	ENSDARG00000093684	tmem238a	transmembrane protein 238a
chr16	42306521	42306907	387	*	5.31	5.61	4.43	1.19	0.0144	0.0485	Promoter (<=1kb)	16	42289071	42306597	17527	2	664750	NM_001039979	0	ENSDARG00000102167	ppox	protoporphyrinogen oxidase
chr7	38548482	38548603	122	*	3.36	3.67	2.37	1.3	0.0144	0.0485	Intron (NM_001328413/58137, intron 10 of 15)	7	38535934	38570944	35011	2	58137	NM_001328413	22341	ENSDARG00000005315	celf1	cugbp, Elav-like family member 1
chr4	3612307	3612459	153	*	1.37	0.65	2.21	-1.56	0.0144	0.0485	Intron (NM_001302228/792371, intron 2 of 9)	4	3482312	3745095	262784	1	792371	NM_001302228	129995	ENSDARG00000077654	grm8a	glutamate receptor, metabotropic 8a
chr15	8177655	8177871	217	*	1.63	0.83	2.52	-1.69	0.0144	0.0485	Promoter (<=1kb)	15	8170888	8177878	6991	2	678555	NM_001040313	7	ENSDARG00000062553	bach1a	BTB and CNC homology 1, basic leucine zipper transcription factor 1 a
chr7	18667374	18667673	300	*	2.71	2.19	3.4	-1.21	0.0144	0.0485	Distal Intergenic	7	18617986	18656069	38084	2	560168	NM_001109707	-11305	ENSDARG00000008660	coro1b	coronin, actin binding protein, 1B
chr7	38896225	38896361	137	*	1.75	1.06	2.57	-1.5	0.0144	0.0485	Promoter (1-2kb)	7	38897971	38954874	56904	1	338317	NM_001243038	-1610	ENSDARG00000015793	creb3l1	cAMP responsive element binding protein 3-like 1
chr14	5894392	5894562	171	*	1.45	0.73	2.28	-1.56	0.0144	0.0485	Intron (NM_001199870/568839, intron 4 of 14)	14	5866894	5916580	49687	2	568839	NM_001199870	22018	ENSDARG00000076306	loxl3a	lysyl oxidase-like 3a
chr16	41921866	41922040	175	*	1.26	0.29	2.24	-1.96	0.0144	0.0485	Distal Intergenic	16	41873834	41897474	23641	1	555423	NM_001077539	48032	ENSDARG00000060222	scn1ba	sodium channel, voltage-gated, type I, beta a
chr23	26163235	26163415	181	*	3.59	2.79	4.48	-1.69	0.0144	0.0485	Exon (NM_001099420/565606, exon 13 of 29)	23	26142613	26180850	38238	1	565606	NM_001099420	20622	ENSDARG00000104197	ptpn22	protein tyrosine phosphatase non-receptor type 22
chr16	16863354	16863524	171	*	1.37	0.51	2.29	-1.78	0.0144	0.0486	Distal Intergenic	16	16826504	16839495	12992	1	100526806	NM_001326474	36850	ENSDARG00000075914	kcnj14	potassium inwardly rectifying channel subfamily J member 14
chr15	22435295	22435720	426	*	4.53	4.8	3.75	1.05	0.0144	0.0486	Promoter (<=1kb)	15	22435460	22444746	9287	1	562331	NM_001271624	0	ENSDARG00000024920	tlcd5a	TLC domain containing 5a
chr8	33068280	33068543	264	*	6.5	6.27	6.87	-0.6	0.0144	0.0486	Intron (NM_001100146/100101642, intron 8 of 20)	8	32914636	33114202	199567	2	100101642	NM_001100146	45659	ENSDARG00000068370	ralgps1	Ral GEF with PH domain and SH3 binding motif 1
chr17	17383055	17383350	296	*	2.45	1.83	3.21	-1.38	0.0144	0.0486	Intron (NM_001080009/563598, intron 5 of 24)	17	16906523	17447899	541377	2	563598	NM_001080009	64549	ENSDARG00000043746	nrxn3a	neurexin 3a
chr18	42290254	42290416	163	*	3.62	3.14	4.27	-1.12	0.0144	0.0486	Intron (NM_199804/327429, intron 6 of 22)	18	42150949	42408365	257417	2	327429	NM_199804	117949	ENSDARG00000021584	cntn5	contactin 5
chr5_KZ115111v1_alt	314870	314990	121	*	2.16	1.34	3.07	-1.73	0.0144	0.0486	Intron (NM_001006003/449833, intron 7 of 11)	183	300060	324315	24256	1	449833	NM_001006003	14810	ENSDARG00000101039	zdhhc15a	zinc finger DHHC-type containing 15a
chr8	26038255	26038620	366	*	2.72	2.23	3.38	-1.14	0.0144	0.0486	5' UTR	8	26034623	26057401	22779	1	406417	NM_213143	3632	ENSDARG00000012848	arih2	ariadne homolog 2 (Drosophila)
chr17	45571437	45571565	129	*	2.33	1.73	3.09	-1.36	0.0144	0.0486	Distal Intergenic	17	45529857	45552059	22203	2	560304	NM_001319133	-19378	ENSDARG00000026335	susd4	sushi domain containing 4
chr18	50461899	50462034	136	*	1.75	1.03	2.59	-1.56	0.0144	0.0486	Intron (NM_199687/324556, intron 7 of 9)	18	50267325	50799457	532133	2	324556	NM_199687	337423	ENSDARG00000103369	taldo1	transaldolase 1
chr11	45410675	45410794	120	*	2.38	1.78	3.13	-1.35	0.0144	0.0486	Exon (NM_214690/325167, exon 7 of 13)	11	45402525	45420334	17810	2	325167	NM_214690	9540	ENSDARG00000103831	ankrd13c	ankyrin repeat domain 13C
chr16	18721397	18721549	153	*	1.07	0.28	1.96	-1.68	0.0144	0.0486	Distal Intergenic	16	18535688	18568930	33243	1	30486	NM_131238	185709	ENSDARG00000002006	rxrbb	retinoid x receptor, beta b
chr8	52562693	52562813	121	*	2.04	1.27	2.91	-1.64	0.0144	0.0486	Distal Intergenic	8	52530901	52547659	16759	1	641572	NM_001037570	31792	ENSDARG00000086906	stambpb	STAM binding protein b
chr17	36626713	36627369	657	*	4.91	5.17	4.16	1.01	0.0144	0.0486	Distal Intergenic	17	36588281	36589605	1325	1	561647	NM_001128709	38432	ENSDARG00000053987	htr1b	5-hydroxytryptamine (serotonin) receptor 1B
chr7	47144011	47144130	120	*	3.39	3	3.96	-0.96	0.0144	0.0486	Distal Intergenic	7	46729419	46781302	51884	2	565811	NM_001195407	-362709	ENSDARG00000103361	tshz3b	teashirt zinc finger homeobox 3b
chr5	26806122	26806507	386	*	3.23	3.58	2.09	1.49	0.0144	0.0486	Distal Intergenic	5	26795502	26806101	10600	1	407646	NM_001123231	10620	ENSDARG00000036481	tcn2	transcobalamin II
chr21	7852017	7852317	301	*	4.85	4.55	5.3	-0.75	0.0144	0.0486	Distal Intergenic	21	7823146	7832352	9207	1	445065	NM_001003459	28871	ENSDARG00000024831	crhbp	corticotropin releasing hormone binding protein
chr4	5247191	5247419	229	*	4.17	4.46	3.36	1.1	0.0144	0.0486	Promoter (<=1kb)	4	5240126	5247266	7141	2	192335	NM_173254	0	ENSDARG00000030694	atp6v1e1b	ATPase H+ transporting V1 subunit E1b
chr19	3409677	3409900	224	*	1.79	1.04	2.64	-1.6	0.0144	0.0486	Distal Intergenic	19	3376430	3381402	4973	2	58032	NM_131519	-28275	ENSDARG00000036912	edn1	endothelin 1
chr10	28835604	28835950	347	*	5.16	5.47	4.18	1.29	0.0144	0.0486	Promoter (<=1kb)	10	28733021	28835770	102750	2	30194	NM_131000	0	ENSDARG00000026531	alcama	activated leukocyte cell adhesion molecule a
chr10	1822624	1822798	175	*	1.64	0.9	2.48	-1.58	0.0144	0.0486	Intron (NM_131223/30470, intron 1 of 22)	10	1745260	1827586	82327	2	30470	NM_131223	4788	ENSDARG00000040087	epb41l4a	erythrocyte membrane protein band 4.1 like 4A
chr9	41577965	41578534	570	*	3.86	4.17	2.93	1.24	0.0144	0.0486	Distal Intergenic	9	41482831	41507712	24882	2	447825	NM_001328216	-70253	ENSDARG00000054583	mfsd6b	major facilitator superfamily domain containing 6b
chr5	48063633	48063752	120	*	1.56	0.82	2.41	-1.59	0.0144	0.0486	Intron (NM_213371/406680, intron 1 of 11)	5	48027992	48070779	42788	2	406680	NM_213371	7027	ENSDARG00000055989	tmem161b	transmembrane protein 161B
chr7	67759826	67760097	272	*	2.01	1.36	2.79	-1.44	0.0144	0.0486	Exon (NM_200876/393850, exon 8 of 27)	7	67749251	67794378	45128	1	393850	NM_200876	10575	ENSDARG00000100013	dhx38	DEAH (Asp-Glu-Ala-His) box polypeptide 38
chr16	15478389	15478719	331	*	2.23	1.43	3.11	-1.68	0.0144	0.0486	Distal Intergenic	16	15562681	15562759	79	1	100033531	NR_030146	-83962	NA	mir461	microRNA 461
chr14	44774020	44774402	383	*	4.86	5.14	4.05	1.09	0.0144	0.0486	Promoter (<=1kb)	14	44774093	44777494	3402	1	497181	NM_001166115	0	ENSDARG00000068265	tomm5	translocase of outer mitochondrial membrane 5 homolog (yeast)
chr15	24049239	24049435	197	*	2.8	1.98	3.7	-1.71	0.0144	0.0486	Distal Intergenic	15	23922269	23942826	20558	2	322995	NM_212633	-106413	ENSDARG00000007566	appbp2	amyloid beta precursor protein (cytoplasmic tail) binding protein 2
chr18	29209296	29209627	332	*	2.49	1.97	3.18	-1.21	0.0144	0.0486	Distal Intergenic	18	29402612	29405644	3033	1	114467	NM_131844	-192985	ENSDARG00000015890	mafa	v-maf avian musculoaponeurotic fibrosarcoma oncogene homolog a (paralog a)
chr12	10280144	10280442	299	*	2.84	2.34	3.51	-1.17	0.0144	0.0486	Intron (NM_001002223/431770, intron 1 of 12)	12	10199220	10300092	100873	2	431770	NM_001002223	19650	ENSDARG00000010957	mpp2b	membrane protein, palmitoylated 2b (MAGUK p55 subfamily member 2)
chr3	44577282	44577530	249	*	3.32	2.57	4.17	-1.59	0.0144	0.0486	Intron (NM_001080589/563570, intron 1 of 1)	3	44541322	44753908	212587	2	563570	NM_001080589	176378	ENSDARG00000052648	hs3st4	heparan sulfate (glucosamine) 3-O-sulfotransferase 4
chr22	22976482	22976752	271	*	3.71	4.04	2.65	1.39	0.0144	0.0486	Distal Intergenic	22	22826004	22826087	84	2	100033461	NR_029937	-150395	NA	mir181a-1	microRNA 181a-1
chr6	6760032	6760417	386	*	2.86	3.21	1.71	1.5	0.0144	0.0486	Intron (NM_001004570/447831, intron 4 of 6)	6	6736925	6775821	38897	2	447831	NM_001004570	15404	ENSDARG00000005343	ccdc85al	coiled-coil domain containing 85A, like
chr7	39759552	39759704	153	*	2.62	2.94	1.65	1.29	0.0144	0.0486	Distal Intergenic	7	39744244	39751529	7286	2	559037	NM_001037384	-8023	ENSDARG00000010021	grpel1	GrpE-like 1, mitochondrial
chr20	40340793	40341096	304	*	4.13	4.41	3.33	1.08	0.0144	0.0486	Intron (NM_001014338/541525, intron 8 of 9)	20	40337425	40367493	30069	2	541525	NM_001014338	26397	ENSDARG00000053119	smpdl3a	sphingomyelin phosphodiesterase acid like 3A
chr3	56993988	56994183	196	*	1.58	0.76	2.48	-1.72	0.0144	0.0486	Distal Intergenic	3	56861113	56871330	10218	2	550424	NM_001017729	-122658	ENSDARG00000001804	zgc:112148	zgc:112148
chr2	15504680	15504908	229	*	2.48	2.86	1.14	1.72	0.0144	0.0486	Intron (NM_001184954/555202, intron 8 of 66)	2	15389941	15562886	172946	2	555202	NM_001184954	57978	ENSDARG00000009014	col11a1b	collagen, type XI, alpha 1b
chr8	50566841	50567007	167	*	1.41	0.7	2.23	-1.53	0.0144	0.0486	Distal Intergenic	8	50463227	50482710	19484	2	571967	NM_001083854	-84131	ENSDARG00000033594	ido1	indoleamine 2,3-dioxygenase 1
chr10	2266665	2267069	405	*	4.31	3.76	5.03	-1.27	0.0144	0.0486	Distal Intergenic	10	1955474	1961930	6457	2	30304	NM_131092	-304735	ENSDARG00000035095	tdgf1	teratocarcinoma-derived growth factor 1
chr16	8404234	8404593	360	*	2.79	3.19	1.34	1.85	0.0144	0.0486	Distal Intergenic	16	8298544	8342749	44206	2	406651	NM_213342	-61485	ENSDARG00000016494	ddc	dopa decarboxylase
chr8	1378730	1379233	504	*	4.77	5.06	3.93	1.13	0.0144	0.0486	Distal Intergenic	8	1433654	1446207	12554	1	30223	NM_131026	-54421	ENSDARG00000098625	efna5b	ephrin-A5b
chr5	17989286	17989780	495	*	4.18	4.48	3.31	1.17	0.0144	0.0486	Intron (NM_178304/352941, intron 1 of 10)	5	17881076	18007077	126002	2	352941	NM_178304	17297	ENSDARG00000018508	zdhhc8b	zinc finger DHHC-type containing 8b
chr14	50320269	50320545	277	*	2.58	2.01	3.31	-1.31	0.0144	0.0486	Distal Intergenic	14	49996952	50028425	31474	2	503769	NM_001013347	-291844	ENSDARG00000101961	abhd18	abhydrolase domain containing 18
chr6	58626096	58626217	122	*	1.73	1.05	2.54	-1.49	0.0144	0.0487	Intron (NM_212863/405789, intron 1 of 3)	6	58622831	58674160	51330	1	405789	NM_212863	3265	ENSDARG00000019516	sp7	Sp7 transcription factor
chr23	25942180	25942375	196	*	2.3	1.68	3.06	-1.38	0.0144	0.0487	3' UTR	23	25879396	25942859	63464	1	503808	NM_001166156	62784	ENSDARG00000086471	pkig	protein kinase (cAMP-dependent, catalytic) inhibitor gamma
chr7	1320769	1320971	203	*	2.44	1.84	3.19	-1.35	0.0144	0.0487	Distal Intergenic	7	1457379	1468521	11143	1	402956	NM_205658	-136408	ENSDARG00000039268	emc4	ER membrane protein complex subunit 4
chr8	41235125	41235321	197	*	1.86	1.24	2.63	-1.39	0.0144	0.0487	Exon (NM_001076620/767682, exon 4 of 16)	8	41229193	41255845	26653	1	767682	NM_001076620	5932	ENSDARG00000079932	zgc:152830	zgc:152830
chr6	1140800	1140921	122	*	0.69	-0.32	1.7	-2.03	0.0144	0.0487	Distal Intergenic	6	1161224	1187749	26526	2	352924	NM_183072	46828	ENSDARG00000100374	txnrd3	thioredoxin reductase 3
chr1	3647377	3647590	214	*	2.82	2.33	3.47	-1.13	0.0144	0.0487	Distal Intergenic	1	3298112	3298249	138	2	100033570	NR_030009	-349128	ENSDARG00000104155	mir17a-1	microRNA 17a-1
chr8	50980604	50980810	207	*	3.83	4.16	2.78	1.37	0.0144	0.0487	Promoter (<=1kb)	8	50968990	50981119	12130	2	431725	NM_001002178	309	ENSDARG00000021287	rab7b	RAB7b, member RAS oncogene family
chr14	27218698	27218881	184	*	2.1	1.51	2.85	-1.34	0.0144	0.0487	Distal Intergenic	14	26801995	26830844	28850	1	559349	NM_001110457	416703	ENSDARG00000016531	klhl4	kelch-like family member 4
chr16	31675354	31675524	171	*	1.48	0.71	2.35	-1.64	0.0144	0.0487	Promoter (<=1kb)	16	31662249	31675736	13488	2	560927	NM_001030150	212	ENSDARG00000100248	c1r	complement component 1, r subcomponent
chr4	14174208	14174764	557	*	3.75	4.09	2.63	1.45	0.0144	0.0487	Distal Intergenic	4	14188327	14192254	3928	2	561376	NM_001044957	17490	ENSDARG00000069780	pus7l	pseudouridine synthase 7 like
chr14	50106299	50106410	112	*	1.49	0.76	2.34	-1.58	0.0144	0.0487	Distal Intergenic	14	49996952	50028425	31474	2	503769	NM_001013347	-77874	ENSDARG00000101961	abhd18	abhydrolase domain containing 18
chr20	41012371	41012493	123	*	2.53	1.92	3.29	-1.37	0.0144	0.0487	Distal Intergenic	20	40769265	40840865	71601	1	566474	NM_001100023	243106	ENSDARG00000041734	tbc1d32	TBC1 domain family, member 32
chr13	31029911	31030199	289	*	3.66	3.95	2.8	1.15	0.0144	0.0487	Distal Intergenic	13	30951176	30967782	16607	1	553443	NM_001083819	78735	ENSDARG00000010154	vstm4a	V-set and transmembrane domain containing 4a
chr15	36033397	36033539	143	*	1.51	0.74	2.37	-1.63	0.0144	0.0487	Distal Intergenic	15	35933094	35944902	11809	1	550277	NM_001017614	100303	ENSDARG00000021046	rhbdd1	rhomboid domain containing 1
chr21	3613571	3613807	237	*	4.74	5	4.01	0.99	0.0144	0.0487	Distal Intergenic	21	3715820	3770587	54768	2	402992	NM_205692	156780	ENSDARG00000036911	scamp1	secretory carrier membrane protein 1
chr13	13271989	13272597	609	*	3.66	3.19	4.29	-1.1	0.0144	0.0487	Intron (NM_131606/58129, intron 2 of 17)	13	13213567	13294872	81306	2	58129	NM_131606	22275	ENSDARG00000004782	fgfr3	fibroblast growth factor receptor 3
chr7	45268964	45269377	414	*	2.44	1.91	3.13	-1.22	0.0144	0.0487	Distal Intergenic	7	45400759	45403559	2801	1	406359	NM_001103194	-131382	ENSDARG00000007745	uqcrfs1	ubiquinol-cytochrome c reductase, Rieske iron-sulfur polypeptide 1
chr13	41763594	41763765	172	*	1.23	0.37	2.16	-1.8	0.0144	0.0487	Distal Intergenic	13	41910342	41917029	6688	2	393577	NM_200605	153264	ENSDARG00000079516	cisd1	CDGSH iron sulfur domain 1
chr3	5888752	5888871	120	*	2.17	1.51	2.97	-1.47	0.0144	0.0487	Distal Intergenic	3	5778498	5875112	96615	2	100007897	NM_001089460	-13640	ENSDARG00000062748	pkn1b	protein kinase N1b
chr21	12929834	12930352	519	*	2.4	1.83	3.14	-1.31	0.0144	0.0487	Distal Intergenic	21	13066708	13085239	18532	2	619266	NM_001033747	154887	ENSDARG00000012126	zgc:109965	zgc:109965
chr7	70601201	70601406	206	*	1.57	0.84	2.41	-1.57	0.0144	0.0487	Distal Intergenic	7	70338270	70344449	6180	1	553722	NM_001020693	262931	ENSDARG00000031150	gba3	glucosidase, beta, acid 3 (gene/pseudogene)
chr5	59808467	59808712	246	*	3.16	2.5	3.96	-1.46	0.0144	0.0487	Distal Intergenic	5	59553679	59595592	41914	1	568626	NM_001127307	254788	ENSDARG00000032933	dtx2	deltex 2, E3 ubiquitin ligase
chr4	68850837	68850990	154	*	3.5	3.11	4.06	-0.95	0.0144	0.0487	Intron (NM_001320203/100141335, intron 4 of 9)	4	67939836	69621459	1681624	2	100141335	NM_001320203	770469	ENSDARG00000116992	znf1051	zinc finger protein 1051
chr18	49501857	49502315	459	*	3.71	4.02	2.79	1.23	0.0144	0.0487	Distal Intergenic	18	49411408	49428855	17448	1	100333421	NM_001365220	90449	ENSDARG00000039500	si:cabz01090165.1	si:cabz01090165.1
chr25	35402761	35402923	163	*	3.86	3.13	4.71	-1.59	0.0144	0.0487	Distal Intergenic	25	35348614	35360171	11558	2	100006207	NM_001302626	-42590	ENSDARG00000097236	si:ch73-147o17.1	si:ch73-147o17.1
chr22	12497805	12497938	134	*	1.49	1.88	0.06	1.83	0.0144	0.0487	Distal Intergenic	22	12431617	12447113	15497	1	80963	NM_199522	66188	ENSDARG00000076799	rnd3a	Rho family GTPase 3a
chr17	37392321	37392650	330	*	3.71	4.02	2.77	1.24	0.0143	0.0482	Promoter (2-3kb)	17	37384965	37395492	10528	2	541319	NM_001159819	2842	ENSDARG00000053858	crip1	cysteine-rich protein 1
chr10	32664943	32665169	227	*	3.94	3.24	4.76	-1.53	0.0143	0.0482	Promoter (1-2kb)	10	32663180	32672393	9214	1	450081	NM_001006101	1763	ENSDARG00000068919	rad51c	RAD51 paralog C
chr12	14837715	14838002	288	*	2.04	1.3	2.89	-1.6	0.0143	0.0482	Distal Intergenic	12	14920088	14922903	2816	2	114435	NM_131082	84901	ENSDARG00000016854	neurod2	neuronal differentiation 2
chr15	12941869	12942118	250	*	2.01	1.32	2.82	-1.5	0.0143	0.0482	Distal Intergenic	15	13107346	13253724	146379	2	100003690	NM_001113649	311606	ENSDARG00000105059	zgc:172282	zgc:172282
chr18_KZ115572v1_alt	88816	88939	124	*	0.87	0.03	1.78	-1.76	0.0143	0.0482	Distal Intergenic	754	152901	165026	12126	2	562852	NM_001128247	76087	ENSDARG00000053036	olfcr1	olfactory receptor C family, r1
chr24	3088050	3088208	159	*	3.19	2.41	4.06	-1.65	0.0143	0.0482	Distal Intergenic	24	3049838	3061966	12129	1	30072	NM_130916	38212	ENSDARG00000012671	inhbaa	inhibin subunit beta Aa
chr10	11531011	11531156	146	*	1.53	1.91	0.14	1.77	0.0143	0.0482	Distal Intergenic	10	11398203	11501423	103221	1	394078	NM_201103	132808	ENSDARG00000043727	cwc27	CWC27 spliceosome associated cyclophilin
chr25_KZ115723v1_alt	177236	177432	197	*	2.73	3.06	1.69	1.37	0.0143	0.0482	Distal Intergenic	934	108413	124771	16359	2	557919	NM_001079965	-52465	ENSDARG00000063525	adpgk	ADP-dependent glucokinase
chr19	33517586	33517758	173	*	1.61	2.03	0.03	2	0.0143	0.0482	Distal Intergenic	19	33464688	33511699	47012	1	100147776	NM_001127256	52898	ENSDARG00000076296	triqk	triple QxxK/R motif containing
chr19	16584390	16584509	120	*	2.47	1.7	3.34	-1.63	0.0143	0.0482	Distal Intergenic	19	16063232	16086692	23461	1	567701	NM_001201443	521158	ENSDARG00000062060	gmeb1	glucocorticoid modulatory element binding protein 1
chr4	76662299	76662458	160	*	1.13	0.32	2.03	-1.71	0.0143	0.0483	Exon (NM_001004629/447890, exon 3 of 7)	4	76659013	76667230	8218	1	447890	NM_001004629	3286	ENSDARG00000092204	ms4a17a.5	membrane-spanning 4-domains, subfamily A, member 17A.5
chr5	19396187	19396347	161	*	2.94	2.42	3.63	-1.21	0.0143	0.0483	Intron (NM_131099/30315, intron 2 of 9)	5	19385506	19400164	14659	2	30315	NM_131099	3817	ENSDARG00000010591	foxn4	forkhead box N4
chr15	23569263	23569442	180	*	1.09	0.28	1.98	-1.7	0.0143	0.0483	Distal Intergenic	15	23511407	23523222	11816	2	338290	NM_001024388	-46041	ENSDARG00000055991	hmbsb	hydroxymethylbilane synthase, b
chr12	30533204	30533352	149	*	3	2.51	3.66	-1.16	0.0143	0.0483	Intron (NM_001077324/768181, intron 10 of 13)	12	30529446	30540699	11254	2	768181	NM_001077324	7347	ENSDARG00000070041	zgc:153920	zgc:153920
chr17	47355825	47356110	286	*	4.31	3.72	5.05	-1.33	0.0143	0.0483	Distal Intergenic	17	47102957	47178983	76027	1	449988	NM_001362516	252868	ENSDARG00000104663	zgc:103755	zgc:103755
chr8	23363093	23363215	123	*	3.67	2.42	4.78	-2.36	0.0143	0.0483	Exon (NM_001020476/321084, exon 6 of 25)	8	23356264	23381199	24936	1	321084	NM_001020476	6829	ENSDARG00000052402	dnmt3ba	DNA (cytosine-5-)-methyltransferase 3 beta, duplicate a
chr5	71010270	71010578	309	*	3.61	2.84	4.48	-1.64	0.0143	0.0483	Distal Intergenic	5	71252868	71460556	207689	2	100334375	NM_001328411	449978	ENSDARG00000078302	brinp1	bone morphogenetic protein/retinoic acid inducible neural-specific 1
chr1	28627896	28628093	198	*	2.1	2.46	0.87	1.6	0.0143	0.0483	Promoter (1-2kb)	1	28624183	28629471	5289	2	30442	NM_131197	1378	ENSDARG00000089334	ednrba	endothelin receptor Ba
chr25	36480981	36481105	125	*	2.72	2.11	3.47	-1.36	0.0143	0.0483	Distal Intergenic	25	36488164	36492779	4616	2	321806	NM_213100	11674	ENSDARG00000031138	irx3b	iroquois homeobox 3b
chr24	3880998	3881274	277	*	2.13	1.47	2.92	-1.45	0.0143	0.0483	Distal Intergenic	24	4141480	4148914	7435	2	280650	NM_201461	267640	ENSDARG00000029072	klf6a	Kruppel-like factor 6a
chr4	13599506	13599928	423	*	4.11	3.48	4.89	-1.41	0.0143	0.0483	Exon (NM_201087/394062, exon 19 of 23)	4	13586689	13605158	18470	1	394062	NM_201087	12817	ENSDARG00000045680	tnpo3	transportin 3
chr11	4944242	4944519	278	*	4.87	5.16	4.02	1.15	0.0143	0.0483	Distal Intergenic	11	4953964	5463254	509291	1	561197	NM_001329864	-9445	ENSDARG00000045006	ptprga	protein tyrosine phosphatase receptor type Ga
chr7	39680441	39680695	255	*	4.04	3.64	4.62	-0.98	0.0143	0.0483	Distal Intergenic	7	39664009	39678530	14522	1	553264	NM_001328036	16432	ENSDARG00000052244	zgc:158564	zgc:158564
chr14	50059830	50060193	364	*	2.21	1.52	3.02	-1.5	0.0143	0.0483	Distal Intergenic	14	49996952	50028425	31474	2	503769	NM_001013347	-31405	ENSDARG00000101961	abhd18	abhydrolase domain containing 18
chr23_KZ115670v1_alt	52734	52907	174	*	1.41	1.82	-0.12	1.94	0.0143	0.0483	Distal Intergenic	872	206316	206418	103	1	100310765	NR_030650	-153409	ENSDARG00000082246	mir1388	microRNA mir-1388
chr9	7304477	7304603	127	*	5.35	5.03	5.84	-0.8	0.0143	0.0483	Distal Intergenic	9	7275185	7287387	12203	2	393170	NM_200201	-17090	ENSDARG00000044766	mitd1	MIT, microtubule interacting and transport, domain containing 1
chr7	73492236	73492409	174	*	1.85	1.09	2.71	-1.62	0.0143	0.0483	Distal Intergenic	7	73453497	73455918	2422	1	561171	NM_001110109	38739	ENSDARG00000019294	cbln8	cerebellin 8
chr7	33673494	33673615	122	*	4.15	3.43	4.99	-1.57	0.0143	0.0483	Intron (NM_131780/100007463, intron 4 of 19)	7	33647052	33683763	36712	2	100007463	NM_131780	10148	ENSDARG00000069006	tle3b	TLE family member 3, transcriptional corepressor b
chr11	38604519	38604834	316	*	2.01	1.29	2.84	-1.55	0.0143	0.0483	Distal Intergenic	11	38540138	38553770	13633	2	447862	NM_001004601	-50749	ENSDARG00000078473	nucks1a	nuclear casein kinase and cyclin-dependent kinase substrate 1a
chr16	32729134	32729325	192	*	3.89	4.19	3.01	1.18	0.0143	0.0483	Promoter (<=1kb)	16	32729219	32735035	5817	1	564087	NM_001200014	0	ENSDARG00000087048	si:dkey-165n16.1	si:dkey-165n16.1
chr24	17284539	17284866	328	*	2.01	1.32	2.83	-1.51	0.0143	0.0483	Distal Intergenic	24	17269872	17276771	6900	1	431757	NM_001002210	14667	ENSDARG00000020158	spag6	sperm associated antigen 6
chr1	43658969	43659308	340	*	3.99	4.33	2.91	1.41	0.0143	0.0483	Exon (NM_001002577/436850, exon 8 of 9)	1	43652480	43684552	32073	2	436850	NM_001002577	25244	ENSDARG00000052712	suclg1	succinate-CoA ligase, alpha subunit
chr8	22264531	22264788	258	*	3.87	4.18	2.94	1.24	0.0143	0.0483	Distal Intergenic	8	22277215	22282962	5748	1	373130	NM_194404	-12427	ENSDARG00000009748	dffb	DNA fragmentation factor, beta polypeptide (caspase-activated DNase)
chr19	7552627	7552779	153	*	3.19	2.52	3.98	-1.46	0.0143	0.0483	Distal Intergenic	19	7529612	7540821	11210	2	572161	NM_001126439	-11806	ENSDARG00000063244	lix1l	limb and CNS expressed 1 like
chr3	30569497	30569617	121	*	2.25	1.4	3.17	-1.76	0.0143	0.0483	Distal Intergenic	3	30454356	30488063	33708	2	406793	NM_214766	-81434	ENSDARG00000038005	med25	mediator complex subunit 25
chr5	26158765	26158961	197	*	2.13	1.51	2.9	-1.39	0.0143	0.0483	Promoter (2-3kb)	5	26156079	26159921	3843	1	565548	NM_001098183	2686	ENSDARG00000061641	ankrd34bb	ankyrin repeat domain 34Bb
chr17	27558783	27558927	145	*	3.3	2.8	3.97	-1.17	0.0143	0.0483	Intron (NM_001007398/492757, intron 1 of 4)	17	27545214	27706746	161533	1	492757	NM_001007398	13569	ENSDARG00000087556	pacrg	PARK2 co-regulated
chr16	4237922	4238041	120	*	2.51	1.77	3.37	-1.6	0.0143	0.0483	Distal Intergenic	16	4196932	4203022	6091	2	327053	NM_199762	-34900	ENSDARG00000013478	rrp15	ribosomal RNA processing 15 homolog
chr24	31159792	31160040	249	*	2.99	3.31	2.02	1.29	0.0143	0.0483	Distal Intergenic	24	31170362	31194816	24455	2	326931	NM_199753	34776	ENSDARG00000099510	cnn3a	calponin 3, acidic a
chr2	47377284	47377804	521	*	4.21	4.49	3.43	1.06	0.0143	0.0483	Downstream (1-2kb)	2	47379266	47431204	51939	2	30532	NM_131277	53400	ENSDARG00000010192	pax3a	paired box 3a
chr21	31939338	31939522	185	*	1.57	0.76	2.47	-1.71	0.0143	0.0483	Distal Intergenic	21	32021266	32036597	15332	2	100073329	NM_001098766	97075	ENSDARG00000102482	zgc:165573	zgc:165573
chr11	5008425	5008666	242	*	2.7	3.03	1.69	1.33	0.0143	0.0484	Intron (NM_001329864/561197, intron 1 of 29)	11	4953964	5463254	509291	1	561197	NM_001329864	54461	ENSDARG00000045006	ptprga	protein tyrosine phosphatase receptor type Ga
chr17	13730709	13731112	404	*	2.84	2.31	3.52	-1.21	0.0143	0.0484	Distal Intergenic	17	13099476	13110122	10647	1	407733	NM_001172570	631233	ENSDARG00000015851	pnn	pinin, desmosome associated protein
chr14	20296747	20296867	121	*	3.63	3.2	4.22	-1.01	0.0143	0.0484	Distal Intergenic	14	20156584	20189279	32696	1	259191	NM_152963	140163	ENSDARG00000037433	fmr1	FMRP translational regulator 1
chr15	46846796	46847009	214	*	2.99	3.3	2.02	1.28	0.0143	0.0484	Distal Intergenic	15	46853505	46887624	34120	1	767698	NM_001076636	-6496	ENSDARG00000102724	zgc:153039	zgc:153039
chr11	34096678	34096800	123	*	1.53	0.87	2.32	-1.45	0.0143	0.0484	Promoter (<=1kb)	11	34084532	34097418	12887	2	334082	NM_199856	618	ENSDARG00000023176	tdo2b	tryptophan 2,3-dioxygenase b
chr7	60445269	60445685	417	*	2.7	2.13	3.43	-1.3	0.0143	0.0484	Distal Intergenic	7	60396957	60416090	19134	1	791681	NM_200097	48312	ENSDARG00000051955	brms1	BRMS1 transcriptional repressor and anoikis regulator
chr8	25272457	25272627	171	*	2.45	1.81	3.24	-1.44	0.0143	0.0484	Distal Intergenic	8	25295234	25297928	2695	1	324366	NM_212676	-22607	ENSDARG00000042533	gstm.1	glutathione S-transferase mu, tandem duplicate 1
chr24	16694720	16694839	120	*	3.37	2.53	4.29	-1.76	0.0143	0.0484	Intron (NM_001271670/561295, intron 17 of 18)	24	16547006	16706939	159934	1	561295	NM_001271670	147714	ENSDARG00000058821	sema5a	sema domain, seven thrombospondin repeats (type 1 and type 1-like), transmembrane domain (TM) and short cytoplasmic domain, (semaphorin) 5A
chr17	38887185	38887459	275	*	3.51	3.81	2.58	1.23	0.0143	0.0484	Promoter (<=1kb)	17	38784376	38887379	103004	2	550467	NM_001017770	0	ENSDARG00000015425	slc24a4a	solute carrier family 24 member 4a
chr2	16845531	16845662	132	*	2.64	2.06	3.37	-1.31	0.0143	0.0484	Promoter (1-2kb)	2	16846772	16867938	21167	1	100136860	NM_001114579	-1110	ENSDARG00000077022	fam131a	family with sequence similarity 131 member A
chr23	2151036	2151155	120	*	3.79	2.96	4.7	-1.74	0.0143	0.0484	Distal Intergenic	23	1927043	2037625	110583	2	432371	NM_001002301	-113411	ENSDARG00000006288	prdm5	PR domain containing 5
chr16	48409587	48409779	193	*	4.36	3.08	5.48	-2.4	0.0143	0.0484	Exon (NM_199595/322275, exon 14 of 14)	16	48409066	48430245	21180	2	322275	NM_199595	20466	ENSDARG00000006092	rad21a	RAD21 cohesin complex component a
chr24	391557	391677	121	*	4.8	4.5	5.26	-0.76	0.0143	0.0484	Distal Intergenic	24	402493	495029	92537	1	503750	NM_001013328	-10816	ENSDARG00000021909	zgc:110852	zgc:110852
chr5	26026777	26026939	163	*	4.81	3.7	5.86	-2.16	0.0143	0.0484	Distal Intergenic	5	26075287	26078122	2836	1	565869	NM_001128729	-48348	ENSDARG00000068194	klf9	Kruppel-like factor 9
chr16	41533238	41533754	517	*	4.63	4.87	3.99	0.88	0.0143	0.0484	Promoter (1-2kb)	16	41532613	41535677	3065	2	436813	NM_001002540	1923	ENSDARG00000070131	rpp25l	ribonuclease P/MRP 25 subunit-like
chr15	8948165	8948307	143	*	2.12	1.45	2.93	-1.48	0.0143	0.0484	Distal Intergenic	15	8990578	9002162	11585	2	550481	NM_001017784	53855	ENSDARG00000012968	rhoub	ras homolog family member Ub
chr20	7661527	7661645	119	*	1.42	0.69	2.26	-1.57	0.0143	0.0484	Distal Intergenic	20	7584211	7593102	8892	1	606665	NM_001244756	77316	ENSDARG00000046081	bloc1s2	biogenesis of lysosomal organelles complex-1, subunit 2
chr8	32088243	32088597	355	*	1.96	1.23	2.79	-1.56	0.0143	0.0484	Intron (NM_001159661/432373, intron 26 of 28)	8	32030844	32346291	315448	2	432373	NM_001159661	257694	ENSDARG00000054224	ipo11	importin 11
chr11	4110373	4110782	410	*	4.92	5.17	4.23	0.94	0.0143	0.0484	Distal Intergenic	11	4148809	4175773	26965	2	553593	NM_001020570	64991	ENSDARG00000030632	ccdc3b	coiled-coil domain containing 3b
chr12	5020602	5021176	575	*	3.28	2.74	3.98	-1.23	0.0143	0.0484	Distal Intergenic	12	5048074	5071836	23763	1	561788	NM_001113591	-26898	ENSDARG00000102624	kif22	kinesin family member 22
chr7	61139937	61140078	142	*	2.26	1.6	3.06	-1.46	0.0143	0.0484	Distal Intergenic	7	61184551	61218237	33687	1	557813	NM_001130770	-44473	ENSDARG00000079584	zgc:194930	zgc:194930
chr24	31842847	31843147	301	*	2.93	2.47	3.56	-1.09	0.0143	0.0484	Distal Intergenic	24	32151630	32173738	22109	2	449878	NM_001018143	330591	ENSDARG00000034518	trdmt1	tRNA aspartic acid methyltransferase 1
chr15	44646712	44647157	446	*	3.27	2.79	3.93	-1.14	0.0143	0.0484	Intron (NM_214806/407735, intron 11 of 15)	15	44500004	44810137	310134	2	407735	NM_214806	162980	ENSDARG00000037496	gria4a	glutamate receptor, ionotropic, AMPA 4a
chr5	17528220	17528613	394	*	3.08	2.55	3.77	-1.22	0.0143	0.0484	Distal Intergenic	5	17780475	17813299	32825	1	564271	NM_001100015	-251862	ENSDARG00000075347	chfr	checkpoint with forkhead and ring finger domains, E3 ubiquitin protein ligase
chr20	54368744	54368904	161	*	1.43	0.61	2.34	-1.73	0.0143	0.0484	Distal Intergenic	20	54349461	54358711	9251	1	402951	NM_205653	19283	ENSDARG00000008218	znf410	zinc finger protein 410
chr25	15136407	15136532	126	*	1.78	1.06	2.61	-1.56	0.0143	0.0484	Distal Intergenic	25	15178341	15214335	35995	2	30245	NM_131046	77803	ENSDARG00000031420	wt1a	WT1 transcription factor a
chr24	29066332	29066451	120	*	2.04	1.24	2.93	-1.69	0.0143	0.0484	Distal Intergenic	24	28935236	28967023	31788	1	565672	NM_001039930	131096	ENSDARG00000011247	rnpc3	RNA-binding region (RNP1, RRM) containing 3
chr15	27997495	27997627	133	*	1.18	0.34	2.1	-1.75	0.0143	0.0484	Distal Intergenic	15	28077295	28085480	8186	2	492783	NM_001007424	87853	ENSDARG00000041137	dhrs13a.3	dehydrogenase/reductase (SDR family) member 13a, duplicate 3
chr10	32912690	32912809	120	*	4.13	3.4	4.97	-1.58	0.0143	0.0484	Distal Intergenic	10	32881592	32890617	9026	2	735248	NM_001045333	-22073	ENSDARG00000061580	kctd7	potassium channel tetramerization domain containing 7
chr7	12379272	12379877	606	*	3.16	2.69	3.79	-1.11	0.0143	0.0484	Exon (NM_001037578/641580, exon 4 of 4)	7	12371073	12380200	9128	1	641580	NM_001037578	8199	ENSDARG00000006474	saxo2	stabilizer of axonemal microtubules 2
chr11	580522	580690	169	*	2.69	1.95	3.55	-1.6	0.0143	0.0484	Distal Intergenic	11	565615	574478	8864	2	170783	NM_152979	-6044	ENSDARG00000007630	mkrn2	makorin, ring finger protein, 2
chr17	4240065	4240388	324	*	2.6	2.03	3.33	-1.3	0.0143	0.0484	Exon (NM_130948/30125, exon 2 of 2)	17	4239445	4245304	5860	2	30125	NM_130948	4916	ENSDARG00000037995	gdf3	growth differentiation factor 3
chr13	5731161	5731462	302	*	2.01	1.36	2.81	-1.44	0.0143	0.0484	Distal Intergenic	13	5490549	5569562	79014	2	170446	NM_131893	-161599	ENSDARG00000012078	meis1b	Meis homeobox 1 b
chr13	30720103	30720320	218	*	2.73	3.05	1.72	1.33	0.0143	0.0484	Distal Intergenic	13	30704052	30713309	9258	2	562321	NM_001328086	-6794	ENSDARG00000069332	tmem72	transmembrane protein 72
chr18	29379633	29379823	191	*	2.95	3.35	1.51	1.84	0.0143	0.0485	Distal Intergenic	18	29402612	29405644	3033	1	114467	NM_131844	-22789	ENSDARG00000015890	mafa	v-maf avian musculoaponeurotic fibrosarcoma oncogene homolog a (paralog a)
chr12	12976350	12976702	353	*	3.17	3.52	2.02	1.49	0.0143	0.0485	Distal Intergenic	12	13118621	13164249	45629	1	30208	NM_131014	-141919	ENSDARG00000055527	cmn	calymmin
chr1	25218081	25218565	485	*	4.96	5.19	4.31	0.89	0.0143	0.0485	Distal Intergenic	1	25178106	25214756	36651	1	445203	NM_001003597	39975	ENSDARG00000074451	mnd1	meiotic nuclear divisions 1 homolog (S. cerevisiae)
chr22	36671510	36671861	352	*	3.97	4.29	2.99	1.3	0.0143	0.0485	Downstream (1-2kb)	22	36656698	36661455	4758	1	286748	NM_201294	14812	ENSDARG00000038489	b3gnt7	UDP-GlcNAc:betaGal beta-1,3-N-acetylglucosaminyltransferase 7
chr1	276098	276363	266	*	3.25	2.68	3.97	-1.29	0.0143	0.0485	Exon (NM_001327759/767754, exon 27 of 58)	1	260012	296057	36046	1	767754	NM_001327759	16086	ENSDARG00000063385	cenpe	centromere protein E
chr20	34681752	34681881	130	*	2.56	1.99	3.28	-1.29	0.0143	0.0485	Intron (NM_001014322/541509, intron 7 of 14)	20	34671396	34700654	29259	1	541509	NM_001014322	10356	ENSDARG00000042005	elp3	elongator acetyltransferase complex subunit 3
chr1	58789926	58790402	477	*	3.26	2.6	4.05	-1.46	0.0143	0.0485	Distal Intergenic	1	58840889	58850696	9808	1	791158	NM_001080640	-50487	ENSDARG00000017255	tmed1b	transmembrane p24 trafficking protein 1b
chr12	10918454	10918746	293	*	3.73	4.04	2.79	1.25	0.0143	0.0485	Distal Intergenic	12	11080777	11156920	76144	1	30680	NM_131406	-162031	ENSDARG00000056783	raraa	retinoic acid receptor, alpha a
chr13	39476274	39476438	165	*	2.14	2.54	0.68	1.86	0.0143	0.0485	Distal Intergenic	13	39532050	39533365	1316	1	497317	NM_001202417	-55612	ENSDARG00000011724	marveld1	MARVEL domain containing 1
chr21	37068253	37068635	383	*	3.22	2.66	3.94	-1.28	0.0143	0.0485	Distal Intergenic	21	37090795	37108500	17706	1	560756	NM_001081749	-22160	ENSDARG00000060695	znf346	zinc finger protein 346
chr5	62132171	62132293	123	*	2.24	1.69	2.96	-1.27	0.0143	0.0485	Distal Intergenic	5	61998603	62005162	6560	1	352915	NM_178287	133568	ENSDARG00000035136	selenow1	selenoprotein W, 1
chr21	7787269	7787390	122	*	4.44	4.09	4.96	-0.88	0.0143	0.0485	Distal Intergenic	21	7741780	7781697	39918	2	559905	NM_001079982	-5572	ENSDARG00000060109	aggf1	angiogenic factor with G patch and FHA domains 1
chr3	21351391	21351641	251	*	3.7	4	2.83	1.17	0.0143	0.0485	Exon (NM_001003857/445380, exon 29 of 30)	3	21350515	21382399	31885	2	445380	NM_001003857	30758	ENSDARG00000018687	itga2b	integrin, alpha 2b
chr3	35601088	35601326	239	*	1.23	0.43	2.13	-1.7	0.0143	0.0485	Promoter (<=1kb)	3	35589212	35602215	13004	2	436673	NM_001002400	889	ENSDARG00000037921	gng13b	guanine nucleotide binding protein (G protein), gamma 13b
chr18	10098160	10098339	180	*	1.09	0.29	1.97	-1.68	0.0143	0.0485	Distal Intergenic	18	10296228	10298162	1935	2	566572	NM_001100024	199823	ENSDARG00000003020	lrrc4.2	leucine rich repeat containing 4.2
chr20	49055056	49055165	110	*	0.92	0.05	1.86	-1.81	0.0143	0.0485	Distal Intergenic	20	49081967	49103319	21353	1	393920	NM_200946	-26802	ENSDARG00000007901	crnkl1	crooked neck pre-mRNA splicing factor 1
chr17	11964641	11964998	358	*	3.63	3.96	2.58	1.38	0.0142	0.048	Intron (NM_001037400/569507, intron 5 of 11)	17	11728783	12058171	329389	2	569507	NM_001037400	93173	ENSDARG00000058050	smyd3	SET and MYND domain containing 3
chr12	17772310	17772476	167	*	1.68	1.04	2.46	-1.42	0.0142	0.048	Distal Intergenic	12	17754859	17756905	2047	1	777671	NM_001077652	17451	ENSDARG00000045166	bhlha15	basic helix-loop-helix family, member a15
chr13	21122417	21122640	224	*	1.62	0.93	2.44	-1.51	0.0142	0.048	Distal Intergenic	13	21638455	21650374	11920	2	751700	NM_001045412	527734	ENSDARG00000055938	tspan14	tetraspanin 14
chr15	12759819	12759982	164	*	1.57	0.89	2.38	-1.49	0.0142	0.048	Distal Intergenic	15	12516188	12545683	29496	2	777666	NR_144433	-214136	ENSDARG00000101713	scn2b	sodium channel, voltage-gated, type II, beta
chr18	30632671	30632835	165	*	3.7	2.87	4.6	-1.73	0.0142	0.048	Distal Intergenic	18	30567990	30573842	5853	1	436895	NM_001002622	64681	ENSDARG00000056407	irf8	interferon regulatory factor 8
chr15	908915	909143	229	*	2.94	2.32	3.7	-1.38	0.0142	0.048	Distal Intergenic	15	924464	931818	7355	2	100005727	NM_001366639	22675	ENSDARG00000069957	zgc:162936	zgc:162936
chr3	31623396	31623549	154	*	2.56	2.05	3.24	-1.2	0.0142	0.048	Promoter (1-2kb)	3	31621824	31624176	2353	1	30370	NM_131140	1572	ENSDARG00000054438	fzd2	frizzled class receptor 2
chr12	16084724	16085011	288	*	4.09	4.39	3.2	1.2	0.0142	0.048	Promoter (2-3kb)	12	16087077	16102398	15322	1	503523	NM_001012487	-2066	ENSDARG00000035910	znf281b	zinc finger protein 281b
chr6	14158953	14159449	497	*	3.92	3.34	4.65	-1.31	0.0142	0.048	Distal Intergenic	6	14086688	14146979	60292	2	678560	NM_001113516	-11974	ENSDARG00000062174	cacnb4b	calcium channel, voltage-dependent, beta 4b subunit
chr7	45022573	45022739	167	*	1.74	0.99	2.6	-1.61	0.0142	0.048	Distal Intergenic	7	44966444	44970939	4496	2	436722	NM_001002449	-51634	ENSDARG00000052010	ciao2b	cytosolic iron-sulfur assembly component 2B
chr3	12602022	12602155	134	*	2.11	1.5	2.87	-1.37	0.0142	0.048	Distal Intergenic	3	12554801	12586614	31814	1	266981	NM_207048	47221	ENSDARG00000105046	ccnf	cyclin F
chr20	3339069	3339602	534	*	4.65	4.9	3.96	0.94	0.0142	0.048	Promoter (<=1kb)	20	3339248	3345525	6278	1	100037368	NM_001089520	0	ENSDARG00000079571	mfsd4b	major facilitator superfamily domain containing 4B
chr21	40943654	40943788	135	*	1.97	1.34	2.75	-1.42	0.0142	0.048	Promoter (<=1kb)	21	40944530	40959709	15180	1	569756	NM_001128752	-742	ENSDARG00000020102	kctd16b	potassium channel tetramerization domain containing 16b
chr1	13605401	13605733	333	*	2.44	1.85	3.19	-1.35	0.0142	0.048	Distal Intergenic	1	13261121	13271085	9965	2	572532	NM_001115058	-334316	ENSDARG00000089805	pcdh18a	protocadherin 18a
chr24	11544328	11544593	266	*	3.21	3.54	2.18	1.35	0.0142	0.048	Exon (NM_205728/403042, exon 11 of 15)	24	11529891	11821477	291587	2	403042	NM_205728	276884	ENSDARG00000052131	gli3	GLI family zinc finger 3
chr6_KZ115201v1_alt	220077	220206	130	*	1.14	1.58	-0.66	2.24	0.0142	0.048	Distal Intergenic	290	80576	90898	10323	1	100005419	NM_001110371	139501	ENSDARG00000053447	ppp4r2b	protein phosphatase 4, regulatory subunit 2b
chr13	6528973	6529439	467	*	3.53	3.83	2.6	1.23	0.0142	0.048	Intron (NM_001017855/550553, intron 3 of 4)	13	6342408	6582715	240308	1	550553	NM_001017855	186565	ENSDARG00000044414	csmd1a	CUB and Sushi multiple domains 1a
chr24	26449968	26450245	278	*	2.56	1.94	3.33	-1.39	0.0142	0.048	Distal Intergenic	24	26432549	26440947	8399	1	81592	NM_131772	17419	ENSDARG00000030723	cldn11b	claudin 11b
chr8	37948386	37948871	486	*	3.36	2.85	4.04	-1.19	0.0142	0.048	Exon (NM_001039526/654782, exon 2 of 2)	8	37919451	37949065	29615	1	654782	NM_001039526	28935	ENSDARG00000044900	prlhr2a	prolactin releasing hormone receptor 2a
chr1	25180173	25180292	120	*	1.59	0.84	2.44	-1.61	0.0142	0.048	Promoter (2-3kb)	1	25178106	25214756	36651	1	445203	NM_001003597	2067	ENSDARG00000074451	mnd1	meiotic nuclear divisions 1 homolog (S. cerevisiae)
chr22	34642820	34642961	142	*	1.6	2.01	0.04	1.98	0.0142	0.048	Distal Intergenic	22	34598806	34614124	15319	2	407707	NM_001202416	-28696	ENSDARG00000103977	terf2ip	telomeric repeat binding factor 2, interacting protein
chr4	2265159	2265368	210	*	4.67	4.97	3.77	1.2	0.0142	0.048	Promoter (<=1kb)	4	2258944	2265271	6328	2	724049	NM_001045325	0	ENSDARG00000011246	krr1	KRR1 small subunit processome component homolog
chr22	8877829	8877949	121	*	1.37	0.46	2.33	-1.87	0.0142	0.048	Distal Intergenic	22	9472814	9513059	40246	1	568759	NM_001089420	-594865	ENSDARG00000078169	cacna2d2b	calcium channel, voltage-dependent, alpha 2/delta subunit 2b
chr2	32485623	32486177	555	*	4.67	4.95	3.86	1.09	0.0142	0.048	Promoter (<=1kb)	2	32475789	32486077	10289	2	564788	NM_001346244	0	ENSDARG00000074435	ttc19	tetratricopeptide repeat domain 19
chr11	3944515	3944634	120	*	3.56	2.23	4.7	-2.48	0.0142	0.048	Distal Intergenic	11	3959529	3971033	11505	1	321897	NM_001002297	-14895	ENSDARG00000006219	gnl3	guanine nucleotide binding protein-like 3 (nucleolar)
chr5_KZ115133v1_alt	287934	288108	175	*	1.81	2.23	0.17	2.06	0.0142	0.048	Intron (NM_131866/140426, intron 15 of 18)	205	275885	307247	31363	2	140426	NM_131866	19139	ENSDARG00000026820	gucy2d	guanylate cyclase 2D, retinal
chr16	23422761	23423081	321	*	3.8	4.11	2.83	1.28	0.0142	0.048	Distal Intergenic	16	23431180	23432552	1373	1	336655	NM_212761	-8099	ENSDARG00000009978	icn	ictacalcin
chr18	10964817	10965042	226	*	2.16	2.6	0.36	2.24	0.0142	0.048	Downstream (2-3kb)	18	10967461	10995410	27950	2	567512	NM_001045135	30368	ENSDARG00000042189	tspan33b	tetraspanin 33b
chr12	3818029	3818187	159	*	1.58	0.89	2.39	-1.5	0.0142	0.048	Distal Intergenic	12	3848114	3861234	13121	1	393671	NM_200698	-29927	ENSDARG00000002576	cabp5a	calcium binding protein 5a
chr7	60056904	60057023	120	*	2.1	1.41	2.91	-1.5	0.0142	0.048	Distal Intergenic	7	60079239	60090404	11166	1	393421	NM_200449	-22216	ENSDARG00000035544	etnppl	ethanolamine-phosphate phospho-lyase
chr10	25561734	25561912	179	*	2.48	1.9	3.21	-1.31	0.0142	0.048	Distal Intergenic	10	25694396	25699429	5034	2	30553	NM_131294	137517	ENSDARG00000043848	sod1	superoxide dismutase 1, soluble
chr2	21603374	21603542	169	*	2.83	3.15	1.84	1.31	0.0142	0.048	Promoter (2-3kb)	2	21605547	21607822	2276	1	100003564	NM_001202486	-2005	ENSDARG00000078986	mplkip	M-phase specific PLK1 interacting protein
chr25	31010918	31011355	438	*	4.87	5.18	3.91	1.27	0.0142	0.048	Distal Intergenic	25	31044110	31044207	98	2	100033730	NR_030401	32852	ENSDARG00000081047	mir135a	microRNA 135a
chr8	2442742	2443043	302	*	3	2.44	3.71	-1.27	0.0142	0.048	Exon (NM_001126408/563309, exon 3 of 8)	8	2438638	2454525	15888	1	563309	NM_001126408	4104	ENSDARG00000043550	si:ch211-220d9.3	si:ch211-220d9.3
chr1	7070017	7070137	121	*	1.58	0.81	2.45	-1.63	0.0142	0.048	Distal Intergenic	1	6817290	6925113	107824	1	100007677	NM_001143751	252727	ENSDARG00000063207	erbb4a	erb-b2 receptor tyrosine kinase 4a
chr15	32202137	32202260	124	*	4.52	4.16	5.05	-0.89	0.0142	0.048	Distal Intergenic	15	32249087	32267149	18063	1	449664	NM_001005935	-46827	ENSDARG00000059244	arfip2a	ADP-ribosylation factor interacting protein 2a
chr11	25839347	25839670	324	*	2.28	1.71	3.01	-1.29	0.0142	0.048	5' UTR	11	25833223	25853212	19990	2	327162	NM_001102617	13542	ENSDARG00000061916	tmem51b	transmembrane protein 51b
chr10	6280750	6281085	336	*	3.52	3.81	2.68	1.13	0.0142	0.048	Exon (NM_001009560/494453, exon 47 of 56)	10	6121558	6313106	191549	1	494453	NM_001009560	159192	ENSDARG00000100729	tln1	talin 1
chr10	45144298	45144462	165	*	2.38	2.76	1.06	1.69	0.0142	0.048	Distal Intergenic	10	45059797	45070182	10386	1	406472	NM_213191	84501	ENSDARG00000098361	nudcd3	NudC domain containing 3
chr7	70575238	70575357	120	*	2.06	1.27	2.95	-1.68	0.0142	0.0481	Distal Intergenic	7	70338270	70344449	6180	1	553722	NM_001020693	236968	ENSDARG00000031150	gba3	glucosidase, beta, acid 3 (gene/pseudogene)
chr6	7582884	7583322	439	*	4.35	4.7	3.21	1.49	0.0142	0.0481	Distal Intergenic	6	7533718	7550060	16343	1	368737	NM_001002070	49166	ENSDARG00000039578	pa2g4a	proliferation-associated 2G4, a
chr24	2719610	2719749	140	*	0.98	0.14	1.9	-1.76	0.0142	0.0481	Intron (NM_001105594/793097, intron 1 of 6)	24	2558169	2736809	178641	2	793097	NM_001105594	17060	ENSDARG00000091247	fars2	phenylalanyl-tRNA synthetase 2, mitochondrial
chr7	57887337	57887521	185	*	3.91	3.25	4.7	-1.44	0.0142	0.0481	3' UTR	7	57886148	58130703	244556	2	450043	NM_001346207	243182	ENSDARG00000043313	ank2b	ankyrin 2b, neuronal
chr20	32231437	32231684	248	*	2.24	1.58	3.04	-1.46	0.0142	0.0481	Distal Intergenic	20	32224405	32230287	5883	1	436933	NM_001002660	7032	ENSDARG00000020693	sesn1	sestrin 1
chr20	2250461	2250561	101	*	1.47	0.78	2.29	-1.51	0.0142	0.0481	Distal Intergenic	20	2240358	2241851	1494	1	556369	NM_001044800	10103	ENSDARG00000031540	tmem200a	transmembrane protein 200A
chr2	48264578	48264748	171	*	1.46	0.73	2.3	-1.56	0.0142	0.0481	Distal Intergenic	2	48203278	48255800	52523	2	561830	NM_001030161	-8778	ENSDARG00000009735	gigyf2	GRB10 interacting GYF protein 2
chr14	51854094	51854213	120	*	2.89	2.1	3.77	-1.67	0.0142	0.0481	Distal Intergenic	14	51164054	51619388	455335	2	799734	NM_001114465	-234706	ENSDARG00000099034	unc5a	unc-5 netrin receptor A
chr15	35042824	35043168	345	*	5.07	5.36	4.24	1.12	0.0142	0.0481	Promoter (<=1kb)	15	35043009	35092735	49727	1	406840	NM_213519	0	ENSDARG00000015822	sesn3	sestrin 3
chr14	51249670	51249997	328	*	3.5	3	4.16	-1.17	0.0142	0.0481	Exon (NM_001114465/799734, exon 7 of 15)	14	51164054	51619388	455335	2	799734	NM_001114465	369391	ENSDARG00000099034	unc5a	unc-5 netrin receptor A
chr10	8537073	8537247	175	*	3.58	3.9	2.63	1.27	0.0142	0.0481	Distal Intergenic	10	8629275	8631358	2084	1	565492	NM_001030197	-92028	ENSDARG00000036670	aplnrb	apelin receptor b
chr25	5941326	5941521	196	*	3.34	2.81	4.03	-1.22	0.0142	0.0481	Distal Intergenic	25	5983448	5990181	6734	1	406292	NM_213019	-41927	ENSDARG00000092798	ppib	peptidylprolyl isomerase B (cyclophilin B)
chr8	13910168	13910563	396	*	2.06	1.39	2.86	-1.47	0.0142	0.0481	Exon (NM_001128554/100002795, exon 6 of 11)	8	13849999	13955872	105874	1	100002795	NM_001128554	60169	ENSDARG00000079962	doc2d	double C2-like domains, delta
chr10	10656006	10656262	257	*	1.92	1.27	2.7	-1.43	0.0142	0.0481	Distal Intergenic	10	10564447	10607118	42672	2	30505	NM_001109694	-48888	ENSDARG00000069446	dbh	dopamine beta-hydroxylase (dopamine beta-monooxygenase)
chr7	59286279	59286430	152	*	1.33	0.59	2.19	-1.6	0.0142	0.0481	Intron (NM_001110485/100004656, intron 4 of 8)	7	59247451	59311168	63718	2	100004656	NM_001110485	24738	ENSDARG00000099485	m1ap	meiosis 1 associated protein
chr25	23759670	23760155	486	*	4.13	3.67	4.75	-1.07	0.0142	0.0481	Distal Intergenic	25	23777510	23815951	38442	1	415142	NM_001002052	-17355	ENSDARG00000045696	mrpl23	mitochondrial ribosomal protein L23
chr22	22070099	22070362	264	*	1.99	1.35	2.78	-1.43	0.0142	0.0481	Distal Intergenic	22	22021997	22036301	14305	1	445232	NM_001003626	48102	ENSDARG00000016364	gna15.1	guanine nucleotide binding protein (G protein), alpha 15 (Gq class), tandem duplicate 1
chr14	13385745	13386048	304	*	2.62	2.06	3.33	-1.27	0.0142	0.0481	Distal Intergenic	14	13453199	13525024	71826	1	436598	NM_001002326	-67151	ENSDARG00000037655	pls3	plastin 3 (T isoform)
chr7	62782956	62783075	120	*	4.03	3.52	4.71	-1.19	0.0142	0.0481	Distal Intergenic	7	62248593	62312788	64196	1	393463	NM_200491	534363	ENSDARG00000013842	tbc1d19	TBC1 domain family, member 19
chr7	17933265	17933384	120	*	3.09	2.44	3.87	-1.43	0.0142	0.0481	Exon (NM_214695/326078, exon 9 of 18)	7	17907883	17943677	35795	1	326078	NM_214695	25382	ENSDARG00000013031	mta2	metastasis associated 1 family, member 2
chr16	37470674	37470963	290	*	3.92	4.2	3.1	1.1	0.0142	0.0481	Distal Intergenic	16	37891782	37944480	52699	1	562035	NM_001353863	-420819	ENSDARG00000087369	cep162	centrosomal protein 162
chr10	43141006	43141188	183	*	2.74	2.13	3.5	-1.37	0.0142	0.0481	Intron (NM_200786/393759, intron 3 of 7)	10	43117698	43183970	66273	1	393759	NM_200786	23308	ENSDARG00000010732	xrcc4	X-ray repair complementing defective repair in Chinese hamster cells 4
chr15	28061941	28062060	120	*	3	2.35	3.79	-1.43	0.0142	0.0481	Distal Intergenic	15	28077295	28085480	8186	2	492783	NM_001007424	23420	ENSDARG00000041137	dhrs13a.3	dehydrogenase/reductase (SDR family) member 13a, duplicate 3
chr9	56422991	56423206	216	*	5.36	4.81	6.07	-1.27	0.0142	0.0481	Promoter (<=1kb)	9	56422311	56426243	3933	1	791773	NM_200417	680	ENSDARG00000102888	gpr39	G protein-coupled receptor 39
chr4	47792784	47792968	185	*	3.45	3.81	2.23	1.58	0.0142	0.0481	Distal Intergenic	4	47257854	47262290	4437	1	30186	NM_130993	534930	ENSDARG00000105570	crestin	crestin
chr9	6789868	6790421	554	*	3.42	2.97	4.04	-1.07	0.0142	0.0481	Distal Intergenic	9	6658594	6661699	3106	2	30386	NM_131150	-128169	ENSDARG00000042032	pou3f3a	POU class 3 homeobox 3a
chr2	23783642	23783763	122	*	2.38	1.81	3.1	-1.29	0.0142	0.0481	Distal Intergenic	2	23808642	23817395	8754	1	492770	NM_001007411	-24879	ENSDARG00000003068	gorasp1a	golgi reassembly stacking protein 1a
chr24	20942744	20942898	155	*	3.53	2.85	4.34	-1.49	0.0142	0.0481	Distal Intergenic	24	20927202	20934664	7463	1	336363	NM_001089343	15542	ENSDARG00000063344	fam162a	family with sequence similarity 162 member A
chr18	15913874	15914079	206	*	1.65	0.84	2.54	-1.7	0.0142	0.0481	Intron (NM_001328211/562798, intron 3 of 16)	18	15887830	15932502	44673	2	562798	NM_001328211	18423	ENSDARG00000062855	plekhg7	pleckstrin homology domain containing, family G (with RhoGef domain) member 7
chr2	45821311	45821733	423	*	3.98	4.3	2.98	1.32	0.0142	0.0481	Distal Intergenic	2	45665493	45691072	25580	2	724011	NM_001045316	-130239	ENSDARG00000053104	fam102ba	family with sequence similarity 102 member Ba
chr17	32151242	32151602	361	*	2.04	1.43	2.79	-1.36	0.0142	0.0481	Distal Intergenic	17	32365941	32370025	4085	2	559076	NM_001077604	218423	ENSDARG00000013794	klf11b	Kruppel-like factor 11b
chr14	6809180	6809647	468	*	2.72	2.19	3.42	-1.24	0.0142	0.0481	Distal Intergenic	14	6946681	6953673	6993	1	30722	NM_131444	-137034	ENSDARG00000041619	rack1	receptor for activated C kinase 1
chr4	24657721	24658174	454	*	4.47	4.95	2.2	2.75	0.0142	0.0481	Distal Intergenic	4	25054510	25064510	10001	2	30458	NM_131211	406336	ENSDARG00000016526	gata3	GATA binding protein 3
chr9	56235541	56235768	228	*	4.34	3.74	5.09	-1.35	0.0142	0.0481	Promoter (2-3kb)	9	56232548	56245150	12603	1	336124	NM_001089341	2993	ENSDARG00000068596	cnot11	CCR4-NOT transcription complex, subunit 11
chr1	2239111	2239721	611	*	3	2.34	3.8	-1.46	0.0142	0.0481	Intron (NM_001145705/100003903, intron 1 of 1)	1	2222366	2240119	17754	1	100003903	NM_001145705	16745	ENSDARG00000040246	rap2ab	RAP2A, member of RAS oncogene family b
chr7	32854906	32855032	127	*	3.22	2.41	4.11	-1.7	0.0142	0.0481	Exon (NM_001079983/560102, exon 10 of 19)	7	32835503	32895603	60101	2	560102	NM_001079983	40571	ENSDARG00000036147	ano5b	anoctamin 5b
chr3	29809147	29809418	272	*	2.17	1.54	2.95	-1.41	0.0142	0.0481	Intron (NM_200641/393614, intron 2 of 3)	3	29714775	29845174	130400	1	393614	NM_200641	94372	ENSDARG00000032565	cacng2a	calcium channel, voltage-dependent, gamma subunit 2a
chrUn_KN149707v2	5120	5318	199	*	3.62	3.95	2.54	1.41	0.0142	0.0481	Promoter (1-2kb)	991	4031	7255	3225	1	393714	NM_200741	1089	ENSDARG00000099389	cdo1	cysteine dioxygenase, type I
chr10	32158530	32158819	290	*	3.07	3.43	1.85	1.58	0.0142	0.0481	Distal Intergenic	10	32104343	32123203	18861	1	30283	NM_131076	54187	ENSDARG00000014796	wnt11	wingless-type MMTV integration site family, member 11
chr2	15500600	15500745	146	*	2.41	1.71	3.23	-1.52	0.0142	0.0481	Intron (NM_001184954/555202, intron 11 of 66)	2	15389941	15562886	172946	2	555202	NM_001184954	62141	ENSDARG00000009014	col11a1b	collagen, type XI, alpha 1b
chr22	23370891	23371039	149	*	1.64	0.88	2.5	-1.61	0.0142	0.0482	Distal Intergenic	22	23264398	23267889	3492	2	100093702	NM_001099256	-103002	ENSDARG00000071439	si:dkey-121a9.3	si:dkey-121a9.3
chr20	29124703	29124823	121	*	3.1	1.84	4.22	-2.38	0.0142	0.0482	Distal Intergenic	20	29209662	29216236	6575	1	325430	NM_001006019	-84839	ENSDARG00000042522	katnbl1	katanin p80 subunit B-like 1
chr10	41383219	41383549	331	*	3.16	3.49	2.14	1.35	0.0142	0.0482	Intron (NM_001040249/678522, intron 2 of 12)	10	41362390	41399988	37599	2	678522	NM_001040249	16439	ENSDARG00000019897	gpat4	glycerol-3-phosphate acyltransferase 4
chr17	17047450	17047727	278	*	2.23	1.48	3.08	-1.6	0.0142	0.0482	Intron (NM_001080009/563598, intron 19 of 24)	17	16906523	17447899	541377	2	563598	NM_001080009	400172	ENSDARG00000043746	nrxn3a	neurexin 3a
chr23	39023790	39024159	370	*	3.84	4.17	2.83	1.34	0.0142	0.0482	Distal Intergenic	23	38941530	38948084	6555	1	572527	NM_001080609	82260	ENSDARG00000044485	sall4	spalt-like transcription factor 4
chr13	4325505	4325799	295	*	2.4	1.79	3.15	-1.36	0.0142	0.0482	Distal Intergenic	13	4232568	4303614	71047	2	406610	NM_213318	-21891	ENSDARG00000014428	ppp2r5d	protein phosphatase 2, regulatory subunit B', delta
chr22	13009505	13009667	163	*	3.52	2.72	4.41	-1.69	0.0142	0.0482	Intron (NM_001024816/554265, intron 2 of 10)	22	12979213	13042992	63780	2	554265	NM_001024816	33325	ENSDARG00000023537	ahr1b	aryl hydrocarbon receptor 1b
chr13	6107332	6107547	216	*	4.33	3.85	4.97	-1.12	0.0142	0.0482	Intron (NM_001003600/445206, intron 6 of 6)	13	6086733	6110011	23279	1	445206	NM_001003600	20599	ENSDARG00000030804	fam120b	family with sequence similarity 120B
chr18	34020054	34020183	130	*	1.42	0.57	2.33	-1.76	0.0142	0.0482	Distal Intergenic	18	34146007	34156765	10759	2	565816	NM_001144796	136582	ENSDARG00000040582	c18h3orf33	c18h3orf33 homolog (H. sapiens)
chr6	4145756	4146836	1081	*	5.11	5.39	4.31	1.08	0.0142	0.0482	Distal Intergenic	6	3984842	3998199	13358	2	393217	NM_200247	-147557	ENSDARG00000040455	unc50	unc-50 homolog (C. elegans)
chr5	20319069	20319833	765	*	6.64	6.93	5.8	1.13	0.0142	0.0482	Promoter (<=1kb)	5	20319544	20416821	97278	1	317741	NM_201295	0	ENSDARG00000035598	coro1ca	coronin, actin binding protein, 1Ca
chr8	45648976	45649128	153	*	1.09	0.29	1.98	-1.69	0.0142	0.0482	Distal Intergenic	8	45755644	45760057	4414	2	336612	NM_212758	110929	ENSDARG00000009212	ppiaa	peptidylprolyl isomerase Aa (cyclophilin A)
chr12	34630103	34630894	792	*	4.87	5.14	4.12	1.02	0.0142	0.0482	Distal Intergenic	12	34439254	34458662	19409	2	393743	NM_200770	-171441	ENSDARG00000074396	fscn2b	fascin actin-bundling protein 2b, retinal
chr1	34685059	34685528	470	*	4.81	5.07	4.1	0.97	0.0142	0.0482	Promoter (<=1kb)	1	34616058	34685329	69272	2	445181	NM_001003575	0	ENSDARG00000013006	pibf1	progesterone immunomodulatory binding factor 1
chr3	43836297	43836533	237	*	2.11	2.5	0.67	1.83	0.0142	0.0482	Distal Intergenic	3	43826014	43831030	5017	1	431731	NM_001002184	10283	ENSDARG00000103483	litaf	lipopolysaccharide-induced TNF factor
chr8	53704649	53704841	193	*	3.67	2.93	4.52	-1.59	0.0142	0.0482	Distal Intergenic	8	53670652	53680375	9724	2	568191	NM_001079834	-24274	ENSDARG00000104973	wnt5a	wingless-type MMTV integration site family, member 5a
chr5	19006194	19006392	199	*	3.8	4.11	2.86	1.25	0.0142	0.0482	Promoter (<=1kb)	5	18965495	19006290	40796	2	570879	NM_001128545	0	ENSDARG00000062511	golga3	golgin A3
chr19	4249726	4249922	197	*	2.54	2.89	1.36	1.53	0.0142	0.0482	Distal Intergenic	19	4126905	4137087	10183	2	100000325	NM_001100068	-112639	ENSDARG00000099049	rragcb	Ras-related GTP binding Cb
chr16	40169326	40169564	239	*	1.66	0.92	2.51	-1.59	0.0142	0.0482	Distal Intergenic	16	40131473	40153683	22211	1	567320	NM_001326438	37853	ENSDARG00000092136	cenpw	centromere protein W
chr4	19722241	19722362	122	*	3.08	1.81	4.2	-2.39	0.0142	0.0482	Intron (NM_001013274/493781, intron 10 of 16)	4	19711958	19742303	30346	2	493781	NM_001013274	19941	ENSDARG00000045544	hgfa	hepatocyte growth factor a
chr22	12651333	12651468	136	*	1.59	0.88	2.42	-1.54	0.0142	0.0482	Exon (NM_131610/58134, exon 7 of 12)	22	12641580	12693845	52266	2	58134	NM_131610	42377	ENSDARG00000041609	adarb1a	adenosine deaminase RNA specific B1a
chr25	20899132	20899251	120	*	1.34	0.46	2.27	-1.81	0.0141	0.0477	Distal Intergenic	25	20997676	21031044	33369	2	323509	NM_198805	131793	ENSDARG00000044760	gnaia	guanine nucleotide binding protein (G protein), alpha inhibiting activity polypeptide a
chr13	26390385	26390805	421	*	2.62	2.01	3.38	-1.37	0.0141	0.0477	Distal Intergenic	13	26552991	26703810	150820	2	103912006	NR_145709	313005	ENSDARG00000093327	si:rp71-1h3.1	si:rp71-1h3.1
chr13	19009257	19009373	117	*	1.14	0.33	2.03	-1.7	0.0141	0.0477	Distal Intergenic	13	18801094	18835278	34185	2	570926	NM_001145606	-173979	ENSDARG00000074597	lzts2a	leucine zipper, putative tumor suppressor 2a
chr14	1529546	1529929	384	*	2	1.34	2.8	-1.45	0.0141	0.0477	Distal Intergenic	14	1435312	1454045	18734	2	767699	NM_001076637	-75501	ENSDARG00000100482	pmt	phosphoethanolamine methyltransferase
chr17	43133377	43133600	224	*	2.15	1.47	2.95	-1.48	0.0141	0.0477	Distal Intergenic	17	43032539	43036291	3753	1	100150438	NM_001327901	100838	ENSDARG00000038154	isca2	iron-sulfur cluster assembly 2
chr12	47254454	47254782	329	*	2.35	1.78	3.09	-1.31	0.0141	0.0477	Distal Intergenic	12	47081695	47116074	34380	1	378847	NM_198072	172759	ENSDARG00000104906	mtr	5-methyltetrahydrofolate-homocysteine methyltransferase
chr16	47095121	47095296	176	*	1.71	1.01	2.53	-1.53	0.0141	0.0478	Distal Intergenic	16	47203422	47204301	880	1	100148066	NM_001351634	-108126	ENSDARG00000098402	LOC100148066	neurexophilin 1
chr21	30426160	30426290	131	*	1.99	1.3	2.8	-1.5	0.0141	0.0478	Intron (NM_001077287/768144, intron 12 of 18)	21	30418682	30467907	49226	2	768144	NM_001077287	41617	ENSDARG00000056453	afap1l1b	actin filament associated protein 1-like 1b
chr8	54119865	54119985	121	*	2.25	1.67	2.99	-1.33	0.0141	0.0478	Distal Intergenic	8	54135642	54145730	10089	1	393991	NM_201016	-15657	NA	brpf1	bromodomain and PHD finger containing, 1
chr19	40210938	40211175	238	*	2.8	3.13	1.74	1.39	0.0141	0.0478	Distal Intergenic	19	40196464	40199102	2639	2	336575	NM_212756	-11836	ENSDARG00000088641	grn2	granulin 2
chr12	38001335	38001745	411	*	4.13	4.5	2.9	1.6	0.0141	0.0478	Distal Intergenic	12	38556491	38561296	4806	1	436759	NM_001002486	-554746	ENSDARG00000006413	rpl38	ribosomal protein L38
chr1	37424931	37425073	143	*	1.82	1.14	2.63	-1.49	0.0141	0.0478	Distal Intergenic	1	37391176	37417841	26666	1	567331	NM_001130605	33755	ENSDARG00000074989	sparcl1	SPARC-like 1
chr8	44135529	44135829	301	*	2.34	1.73	3.1	-1.37	0.0141	0.0478	Distal Intergenic	8	44224709	44238626	13918	2	368200	NM_183338	102797	ENSDARG00000041699	piwil1	piwi-like RNA-mediated gene silencing 1
chr17	37194766	37195291	526	*	5.27	5.5	4.66	0.84	0.0141	0.0478	Distal Intergenic	17	37204230	37214196	9967	2	550547	NM_001017849	18905	ENSDARG00000079500	kif3cb	kinesin family member 3Cb
chr21	30521359	30521478	120	*	3.53	2.68	4.44	-1.75	0.0141	0.0478	Exon (NM_001007329/492363, exon 4 of 12)	21	30502002	30537411	35410	1	492363	NM_001007329	19357	ENSDARG00000020645	slc7a3a	solute carrier family 7 member 3a
chr4	16587014	16587558	545	*	3.57	3.12	4.19	-1.07	0.0141	0.0478	Distal Intergenic	4	16615026	16628801	13776	2	407729	NM_001013273	41243	ENSDARG00000020749	caprin2	caprin family member 2
chr14	25178652	25178771	120	*	1.98	2.37	0.56	1.81	0.0141	0.0478	Distal Intergenic	14	25159129	25159206	78	2	100033528	NR_030143	-19446	ENSDARG00000082809	mir458	microRNA 458
chr18	50594529	50594654	126	*	2.26	1.6	3.06	-1.46	0.0141	0.0478	Intron (NM_199687/324556, intron 6 of 9)	18	50267325	50799457	532133	2	324556	NM_199687	204803	ENSDARG00000103369	taldo1	transaldolase 1
chr3	32021978	32022433	456	*	3.07	2.5	3.79	-1.29	0.0141	0.0478	Exon (NM_001195240/559096, exon 2 of 4)	3	31961489	32049779	88291	1	559096	NM_001195240	60489	ENSDARG00000055855	kcnc3a	potassium voltage-gated channel, Shaw-related subfamily, member 3a
chr2	14000183	14000371	189	*	0.91	0.04	1.84	-1.79	0.0141	0.0478	Distal Intergenic	2	13907452	13940919	33468	1	394039	NM_201064	92731	ENSDARG00000099519	cpdp	CPD photolyase
chr24	28817742	28817862	121	*	1.83	1.16	2.64	-1.47	0.0141	0.0478	Intron (NM_001083844/565402, intron 34 of 65)	24	28764845	28893251	128407	2	565402	NM_001083844	75389	ENSDARG00000026165	col11a1a	collagen, type XI, alpha 1a
chr18	23620416	23620536	121	*	2.7	2.04	3.49	-1.45	0.0141	0.0478	Distal Intergenic	18	23868651	23875370	6720	2	30424	NM_131183	254834	ENSDARG00000040926	nr2f2	nuclear receptor subfamily 2, group F, member 2
chr23	45470236	45470637	402	*	4.8	5.24	2.99	2.25	0.0141	0.0478	Distal Intergenic	23	45456380	45462757	6378	1	403033	NM_001001826	13856	ENSDARG00000023062	ccn1	cellular communication network factor 1
chr21	36753565	36753797	233	*	1.97	1.32	2.76	-1.45	0.0141	0.0478	Distal Intergenic	21	36612439	36619599	7161	2	436807	NM_001002534	-133966	ENSDARG00000044402	nop16	NOP16 nucleolar protein homolog (yeast)
chr13	36403972	36404199	228	*	1.92	1.19	2.76	-1.57	0.0141	0.0478	Distal Intergenic	13	36321088	36391507	70420	2	560400	NM_001168286	-12465	ENSDARG00000007219	actn1	actinin, alpha 1
chr24	18283224	18283571	348	*	3.84	4.18	2.74	1.44	0.0141	0.0478	Promoter (2-3kb)	24	18286433	18444729	158297	1	450054	NM_001006074	-2862	ENSDARG00000038040	tpk1	thiamin pyrophosphokinase 1
chr18	18470756	18470889	134	*	2.92	2.34	3.65	-1.3	0.0141	0.0478	Exon (NM_199521/80955, exon 3 of 3)	18	18439332	18472257	32926	1	80955	NM_199521	31424	ENSDARG00000030871	siah1	siah E3 ubiquitin protein ligase 1
chr7	30450739	30450859	121	*	2.17	1.49	2.99	-1.5	0.0141	0.0478	Intron (NM_001159314/566044, intron 2 of 15)	7	30409071	30492030	82960	2	566044	NM_001159314	41171	ENSDARG00000053468	adam10a	ADAM metallopeptidase domain 10a
chr5	48178190	48178304	115	*	1.67	0.93	2.51	-1.58	0.0141	0.0478	Distal Intergenic	5	48170098	48170184	87	2	100033557	NR_029998	-8006	ENSDARG00000081362	mir9-5	microRNA 9-5
chr12	9281574	9281694	121	*	1.72	0.85	2.65	-1.8	0.0141	0.0478	Intron (NM_131378/30651, intron 3 of 13)	12	9257457	9294806	37350	2	30651	NM_131378	13112	ENSDARG00000018418	pth3r	parathyroid hormone 3 receptor
chr11	26845290	26845450	161	*	1.78	1	2.66	-1.66	0.0141	0.0478	Distal Intergenic	11	26685982	26701611	15630	2	724002	NM_001045307	-143679	ENSDARG00000055620	acad9	acyl-CoA dehydrogenase family, member 9
chr10	13037508	13037627	120	*	3.14	2.42	3.97	-1.56	0.0141	0.0478	Exon (NM_001004502/368461, exon 2 of 3)	10	13000704	13064111	63408	1	368461	NM_001004502	36804	ENSDARG00000099840	lpar1	lysophosphatidic acid receptor 1
chr15	181423	181690	268	*	3.09	3.47	1.74	1.73	0.0141	0.0478	Intron (NM_001042691/735292, intron 3 of 15)	15	168002	252813	84812	2	735292	NM_001042691	71123	ENSDARG00000103467	limk1a	LIM domain kinase 1a
chr16	35127331	35127457	127	*	1.71	1.01	2.54	-1.52	0.0141	0.0478	Intron (NM_001002299/335096, intron 2 of 28)	16	34916158	35329803	413646	2	335096	NM_001002299	202346	ENSDARG00000101081	ptprub	protein tyrosine phosphatase receptor type Ub
chr22_KZ115644v1_alt	91408	91550	143	*	1.73	2.11	0.35	1.77	0.0141	0.0478	Promoter (<=1kb)	841	39252	91445	52194	2	560942	NM_001044943	0	ENSDARG00000100506	crb1	crumbs cell polarity complex component 1
chr7	70667485	70667846	362	*	4.7	4.96	3.96	1	0.0141	0.0478	Distal Intergenic	7	70338270	70344449	6180	1	553722	NM_001020693	329215	ENSDARG00000031150	gba3	glucosidase, beta, acid 3 (gene/pseudogene)
chr15	44446842	44447123	282	*	2.59	2.02	3.31	-1.28	0.0141	0.0478	Intron (NM_001033729/619247, intron 3 of 5)	15	44440136	44465673	25538	2	619247	NM_001033729	18550	ENSDARG00000037501	aasdhppt	aminoadipate-semialdehyde dehydrogenase-phosphopantetheinyl transferase
chr13	49438662	49438923	262	*	3.56	3.91	2.41	1.5	0.0141	0.0478	Distal Intergenic	13	49442073	49444636	2564	2	335866	NM_199981	5713	ENSDARG00000004702	irf2bp2a	interferon regulatory factor 2 binding protein 2a
chr20	49300831	49300951	121	*	1.65	0.89	2.51	-1.62	0.0141	0.0478	Distal Intergenic	20	49105429	49117401	11973	2	541516	NM_001014329	-183430	ENSDARG00000039493	naa20	N(alpha)-acetyltransferase 20, NatB catalytic subunit
chr22	18789570	18789778	209	*	3	3.32	2.03	1.28	0.0141	0.0478	Distal Intergenic	22	18766065	18778905	12841	2	335709	NM_199968	-10665	ENSDARG00000019404	atp5f1d	ATP synthase F1 subunit delta
chr1	6307259	6307629	371	*	2.74	2.2	3.43	-1.23	0.0141	0.0478	Distal Intergenic	1	6243906	6272146	28241	1	553318	NM_001256242	63353	ENSDARG00000043247	gtf3c3	general transcription factor IIIC, polypeptide 3
chr23	32361240	32361359	120	*	2.69	2.13	3.41	-1.28	0.0141	0.0478	Downstream (<1kb)	23	32308814	32334208	25395	2	406837	NM_213516	-27032	ENSDARG00000036831	rnf41	ring finger protein 41
chr11	21146649	21146826	178	*	2.57	1.98	3.31	-1.33	0.0141	0.0478	Distal Intergenic	11	21138038	21139481	1444	1	553957	NM_001020785	8611	ENSDARG00000078147	il10	interleukin 10
chr3	57146281	57146516	236	*	2.3	1.73	3.03	-1.31	0.0141	0.0478	Distal Intergenic	3	57234093	57257075	22983	1	798075	NM_001123516	-87577	ENSDARG00000059574	fscn2a	fascin actin-bundling protein 2a, retinal
chr17	9633811	9633931	121	*	2.12	1.33	3	-1.67	0.0141	0.0478	Distal Intergenic	17	9911978	9930037	18060	2	406602	NM_213310	296106	ENSDARG00000032553	egln3	egl-9 family hypoxia-inducible factor 3
chr14	11862541	11862660	120	*	1.75	0.85	2.69	-1.83	0.0141	0.0478	Distal Intergenic	14	11975408	12020718	45311	2	562505	NM_001105523	158058	ENSDARG00000071868	znf711	zinc finger protein 711
chr13	51992342	51992787	446	*	3.82	4.19	2.59	1.6	0.0141	0.0478	Intron (NM_199954/335499, intron 1 of 8)	13	51903588	52169179	265592	1	335499	NM_199954	88754	NA	klc1b	kinesin light chain 1b
chr22	28643170	28643332	163	*	2.26	1.6	3.05	-1.45	0.0141	0.0478	Promoter (2-3kb)	22	28641841	28645721	3881	2	445190	NM_001003584	2389	ENSDARG00000014995	jagn1b	jagunal homolog 1b
chr14	16860673	16861065	393	*	4.41	4.74	3.38	1.36	0.0141	0.0478	Distal Intergenic	14	16777713	16810439	32727	2	406342	NM_213069	-50234	ENSDARG00000105142	tcirg1b	T cell immune regulator 1, ATPase H+ transporting V0 subunit a3b
chr10	3410049	3410169	121	*	3.38	2.66	4.22	-1.57	0.0141	0.0479	Intron (NM_173229/286745, intron 8 of 13)	10	3397871	3416228	18358	2	286745	NM_173229	6059	ENSDARG00000009864	ddx55	DEAD (Asp-Glu-Ala-Asp) box polypeptide 55
chr18	49098219	49098353	135	*	1.6	2	0.14	1.86	0.0141	0.0479	Distal Intergenic	18	49248389	49265349	16961	1	492462	NM_001007334	-150036	ENSDARG00000040505	yif1b	Yip1 interacting factor homolog B (S. cerevisiae)
chr7	14819105	14819224	120	*	3.83	3	4.74	-1.75	0.0141	0.0479	Distal Intergenic	7	14536107	14543256	7150	1	436791	NM_001002518	282998	ENSDARG00000016307	mrpl46	mitochondrial ribosomal protein L46
chr3	4004859	4004986	128	*	1.9	1.23	2.7	-1.47	0.0141	0.0479	Distal Intergenic	3	3681116	3686490	5375	1	555597	NM_001316762	323743	ENSDARG00000078178	art4	ADP-ribosyltransferase 4 (Dombrock blood group)
chr2	58002358	58002574	217	*	2.33	1.59	3.18	-1.59	0.0141	0.0479	Distal Intergenic	2	58008980	58014652	5673	1	100150696	NM_001128410	-6406	ENSDARG00000105127	si:ch211-155e24.3	si:ch211-155e24.3
chr4	3499748	3500007	260	*	1.82	1.12	2.64	-1.52	0.0141	0.0479	Intron (NM_001302228/792371, intron 1 of 9)	4	3482312	3745095	262784	1	792371	NM_001302228	17436	ENSDARG00000077654	grm8a	glutamate receptor, metabotropic 8a
chr14	21711395	21711522	128	*	1.25	0.38	2.17	-1.8	0.0141	0.0479	Intron (NM_200543/393515, intron 1 of 10)	14	21699414	21746345	46932	1	393515	NM_200543	11981	ENSDARG00000001880	stx3a	syntaxin 3A
chr17	24420980	24421294	315	*	2.54	2.03	3.22	-1.19	0.0141	0.0479	Distal Intergenic	17	24439135	24444357	5223	1	335715	NM_001355553	-17841	ENSDARG00000103849	mdh1ab	malate dehydrogenase 1Ab, NAD (soluble)
chr2_KZ115043v1_alt	163735	163868	134	*	1.81	2.16	0.62	1.54	0.0141	0.0479	Distal Intergenic	91	206698	227474	20777	1	566945	NM_194414	-42830	ENSDARG00000008388	mmp14b	matrix metallopeptidase 14b (membrane-inserted)
chr16	54333707	54333957	251	*	1.64	0.86	2.52	-1.66	0.0141	0.0479	Distal Intergenic	16	54303491	54320491	17001	1	405865	NM_212929	30216	ENSDARG00000005713	ethe1	ETHE1 persulfide dioxygenase
chr3	17011976	17012108	133	*	0.74	-0.16	1.69	-1.85	0.0141	0.0479	Distal Intergenic	3	17030665	17107445	76781	1	30767	NM_131479	-18557	ENSDARG00000022712	stat3	signal transducer and activator of transcription 3 (acute-phase response factor)
chr2	274181	274349	169	*	3.22	3.51	2.34	1.17	0.0141	0.0479	Distal Intergenic	2	314249	316737	2489	1	569975	NM_001030240	-39900	ENSDARG00000074146	zgc:113452	zgc:113452
chr10	11093647	11094011	365	*	2.67	2.15	3.35	-1.2	0.0141	0.0479	3' UTR	10	11038264	11094127	55864	1	553944	NM_001024207	55383	ENSDARG00000058221	ugcg	UDP-glucose ceramide glucosyltransferase
chr11	41301769	41301888	120	*	2.13	1.45	2.95	-1.5	0.0141	0.0479	Intron (NM_131332/30587, intron 5 of 7)	11	41243094	41373311	130218	1	30587	NM_131325	58675	ENSDARG00000100398	pax7a	paired box 7a
chr1	9889221	9889443	223	*	2.02	1.34	2.84	-1.49	0.0141	0.0479	Promoter (2-3kb)	1	9886955	9914630	27676	1	559197	NM_001347835	2266	ENSDARG00000037646	rgs11	regulator of G protein signaling 11
chr16	24790085	24790240	156	*	1.2	0.41	2.09	-1.68	0.0141	0.0479	Distal Intergenic	16	24881122	24881218	97	1	100033542	NR_029985	-90882	ENSDARG00000082825	mirlet7d-1	microRNA let7d-1
chr19	47600182	47600301	120	*	3.16	2.71	3.78	-1.07	0.0141	0.0479	Distal Intergenic	19	47564890	47570667	5778	2	30733	NM_131450	-29515	ENSDARG00000078069	rrm2	ribonucleotide reductase M2 polypeptide
chr1	51731430	51731550	121	*	3.69	4.04	2.58	1.45	0.0141	0.0479	Promoter (2-3kb)	1	51732979	51734508	1530	2	407086	NM_213556	2958	ENSDARG00000074378	junba	JunB proto-oncogene, AP-1 transcription factor subunit a
chr6	2120738	2120909	172	*	1.44	0.75	2.25	-1.5	0.0141	0.0479	Exon (NM_212656/323856, exon 12 of 13)	6	2093390	2121803	28414	1	323856	NM_212656	27348	ENSDARG00000074094	tgm2b	transglutaminase 2b
chr18	48655605	48655735	131	*	1.36	1.76	-0.12	1.88	0.0141	0.0479	Distal Intergenic	18	48696552	48726394	29843	2	504044	NM_001003854	70659	ENSDARG00000041006	st3gal4	ST3 beta-galactoside alpha-2,3-sialyltransferase 4
chr8	9537473	9537822	350	*	4.38	4.67	3.49	1.18	0.0141	0.0479	Intron (NM_001098489/567422, intron 2 of 31)	8	9222943	9570377	347435	2	567422	NM_001098489	32555	ENSDARG00000007172	plxna3	plexin A3
chr8	2009140	2009312	173	*	3.15	3.47	2.15	1.32	0.0141	0.0479	Distal Intergenic	8	1839708	1851978	12271	1	553460	NM_001256256	169432	ENSDARG00000038518	snap29	synaptosome associated protein 29
chr5	4692163	4692429	267	*	3.67	3.97	2.77	1.2	0.0141	0.0479	Distal Intergenic	5	4806870	4828440	21571	1	569092	NM_001030230	-114441	ENSDARG00000024030	angptl2a	angiopoietin-like 2a
chr22	36253726	36253907	182	*	3.65	3.21	4.27	-1.07	0.0141	0.0479	Distal Intergenic	22	36524121	36530267	6147	2	550263	NM_001017600	276360	ENSDARG00000038505	polr2h	info polymerase (RNA) II (DNA directed) polypeptide H
chr13	4933196	4933572	377	*	4.62	4.88	3.91	0.97	0.0141	0.0479	Intron (NM_001083833/561210, intron 6 of 12)	13	4871997	4969687	97691	1	561210	NM_001083833	61199	ENSDARG00000063358	micu1	mitochondrial calcium uptake 1
chr3	2797469	2797736	268	*	2.21	1.58	2.97	-1.39	0.0141	0.0479	Distal Intergenic	3	3016407	3019919	3513	2	565611	NM_001128253	222183	ENSDARG00000075626	zgc:172090	zgc:172090
chr20	29768116	29768502	387	*	3.67	4.06	2.29	1.77	0.0141	0.0479	Exon (NM_199982/335881, exon 23 of 28)	20	29743904	29783644	39741	1	335881	NM_199982	24212	ENSDARG00000017338	kidins220b	kinase D-interacting substrate 220b
chr25	8138076	8138212	137	*	1.18	1.63	-0.66	2.28	0.0141	0.0479	Distal Intergenic	25	8180544	8201983	21440	2	393104	NM_200135	63771	ENSDARG00000018681	saal1	serum amyloid A-like 1
chr10	22536529	22536748	220	*	2.63	2.99	1.42	1.57	0.0141	0.0479	Distal Intergenic	10	22501762	22506044	4283	2	564384	NM_001111177	-30485	ENSDARG00000069190	zgc:172339	zgc:172339
chr18	20540713	20540834	122	*	1.88	1.22	2.68	-1.45	0.0141	0.0479	Downstream (2-3kb)	18	20532618	20540709	8092	1	334270	NM_199880	8095	ENSDARG00000009837	agk	acylglycerol kinase
chr17	37369733	37370083	351	*	3.14	3.48	2.05	1.42	0.0141	0.0479	Distal Intergenic	17	37384965	37395492	10528	2	541319	NM_001159819	25409	ENSDARG00000053858	crip1	cysteine-rich protein 1
chr7	65600491	65600688	198	*	1.58	0.78	2.47	-1.69	0.0141	0.0479	Distal Intergenic	7	65673938	65706839	32902	1	567123	NM_001110471	-73250	ENSDARG00000035629	parvab	parvin, alpha b
chr24	42079507	42079682	176	*	3.76	3	4.63	-1.64	0.0141	0.0479	Intron (NM_199918/334608, intron 3 of 3)	24	42073893	42132869	58977	1	334608	NM_199918	5614	NA	vapa	VAMP (vesicle-associated membrane protein)-associated protein A
chr18	30127645	30127772	128	*	1.98	1.37	2.74	-1.38	0.0141	0.0479	Distal Intergenic	18	29958653	29961818	3166	2	100150067	NM_001128400	-165827	ENSDARG00000092489	si:ch73-103b9.2	si:ch73-103b9.2
chr7	57983133	57983337	205	*	2.78	3.14	1.55	1.59	0.0141	0.0479	Intron (NM_001346207/450043, intron 6 of 42)	7	57886148	58130703	244556	2	450043	NM_001346207	147366	ENSDARG00000043313	ank2b	ankyrin 2b, neuronal
chr8	50808560	50808679	120	*	2.16	1.58	2.9	-1.32	0.0141	0.0479	Intron (NM_001123044/323976, intron 6 of 23)	8	50743037	50839565	96529	1	323976	NM_001123044	65523	ENSDARG00000099651	bin3	bridging integrator 3
chr6	58725788	58726184	397	*	2.59	2.07	3.28	-1.21	0.0141	0.0479	Exon (NM_207099/404631, exon 5 of 6)	6	58698619	58730681	32063	1	404631	NM_207099	27169	ENSDARG00000038467	igsf8	immunoglobulin superfamily, member 8
chr16	34227677	34227796	120	*	1.98	1.3	2.79	-1.49	0.0141	0.0479	Intron (NM_200670/393643, intron 5 of 14)	16	34199304	34285106	85803	2	393643	NM_200670	57310	ENSDARG00000032221	phactr4b	phosphatase and actin regulator 4b
chr18	39116172	39116506	335	*	3.2	2.57	3.97	-1.41	0.0141	0.0479	Intron (NM_194398/373113, intron 2 of 2)	18	39106734	39119007	12274	1	373113	NM_194398	9438	ENSDARG00000026766	bcl2l10	BCL2 like 10
chr25	15128701	15128848	148	*	1.63	0.94	2.45	-1.51	0.0141	0.0479	Distal Intergenic	25	15029046	15049719	20674	2	30567	NM_131304	-78982	ENSDARG00000103379	pax6a	paired box 6a
chr11	1209195	1209410	216	*	1.76	1.05	2.59	-1.54	0.0141	0.0479	Exon (NM_001123238/557430, exon 7 of 22)	11	1148701	1291012	142312	2	557430	NM_001123238	81602	ENSDARG00000063433	atp2b2	ATPase plasma membrane Ca2+ transporting 2
chr8	607325	607558	234	*	2.67	1.95	3.51	-1.56	0.0141	0.0479	Distal Intergenic	8	622642	632241	9600	1	550562	NM_001017864	-15084	ENSDARG00000035697	spinb	spindlin b
chr1	124230	124736	507	*	3.67	3.16	4.35	-1.19	0.0141	0.0479	Exon (NM_131819/114423, exon 8 of 8)	1	119960	125246	5287	1	114423	NM_131819	4270	ENSDARG00000034862	f7	coagulation factor VII
chr15	4467121	4467647	527	*	2.95	2.45	3.61	-1.15	0.0141	0.0479	Intron (NM_198208/338204, intron 4 of 13)	15	4421801	4528292	106492	2	338204	NM_198208	60645	ENSDARG00000042835	tfdp2	transcription factor Dp-2
chr15	22204180	22204314	135	*	1.14	0.34	2.03	-1.69	0.0141	0.0479	Distal Intergenic	15	22136064	22147860	11797	2	563935	NM_001080802	-56320	ENSDARG00000062359	scn3b	sodium channel, voltage-gated, type III, beta
chr8	31960635	31960909	275	*	1.86	1.18	2.66	-1.49	0.0141	0.0479	Distal Intergenic	8	31941650	31943435	1786	1	100001828	NM_001123321	18985	ENSDARG00000093745	htr1aa	5-hydroxytryptamine (serotonin) receptor 1A a
chr14	27138143	27138340	198	*	1.7	0.99	2.53	-1.54	0.0141	0.0479	Distal Intergenic	14	26801995	26830844	28850	1	559349	NM_001110457	336148	ENSDARG00000016531	klhl4	kelch-like family member 4
chr7	68267566	68268039	474	*	3.99	4.29	3.08	1.21	0.0141	0.0479	Intron (NM_001365188/100333211, intron 4 of 9)	7	68214932	68463582	248651	2	100333211	NM_001365188	195543	ENSDARG00000103057	zfhx3	zinc finger homeobox 3
chr21	23190119	23190796	678	*	4.91	5.18	4.16	1.02	0.0141	0.0479	Intron (NM_199635/323269, intron 4 of 6)	21	23163996	23307768	143773	2	323269	NM_199635	116972	ENSDARG00000007184	zbtb16a	zinc finger and BTB domain containing 16a
chr20	37026000	37026228	229	*	3.02	3.34	2.04	1.3	0.0141	0.0479	Distal Intergenic	20	36915143	36917670	2528	2	450024	NM_001006045	-108330	ENSDARG00000030905	cited2	Cbp/p300-interacting transactivator, with Glu/Asp-rich carboxy-terminal domain, 2
chr13	25985616	25985863	248	*	2.74	3.11	1.44	1.67	0.0141	0.0479	Distal Intergenic	13	25853207	25925224	72018	1	678650	NM_001040391	132409	ENSDARG00000061352	bcl11aa	BAF chromatin remodeling complex subunit BCL11A a
chr15	26989259	26989665	407	*	3.93	4.25	2.95	1.3	0.0141	0.0479	Exon (NM_200622/393594, exon 11 of 25)	15	26941075	27354758	413684	1	393594	NM_200622	48184	ENSDARG00000090764	bcas3	BCAS3 microtubule associated cell migration factor
chr8	18650856	18651030	175	*	1.24	0.39	2.16	-1.77	0.0141	0.0479	3' UTR	8	18650411	18667693	17283	2	406601	NM_213309	16663	ENSDARG00000043281	stap2b	signal transducing adaptor family member 2b
chr14	31354541	31354972	432	*	2.52	1.91	3.27	-1.36	0.0141	0.0479	Intron (NM_001305618/387365, intron 2 of 7)	14	31176951	31466214	289264	2	387365	NM_001305618	111242	ENSDARG00000032199	gpc3	glypican 3
chr20	48698881	48699106	226	*	2.1	1.43	2.9	-1.47	0.0141	0.0479	Distal Intergenic	20	48739175	48775067	35893	1	550486	NM_001077284	-40069	ENSDARG00000042661	tsta3l2	tissue specific transplantation antigen P35B, like 2
chr15	23129804	23129904	101	*	1.07	0.15	2.03	-1.88	0.0141	0.0479	Distal Intergenic	15	23200217	23206562	6346	2	792470	NM_001111210	76658	ENSDARG00000077161	ccdc153	coiled-coil domain containing 153
chr21	24220408	24220853	446	*	2.66	2.08	3.4	-1.32	0.0141	0.0479	Intron (NM_001113551/569931, intron 1 of 11)	21	23953179	24412427	459249	1	569931	NM_001113551	267229	ENSDARG00000031075	cadm1a	cell adhesion molecule 1a
chr9	38948479	38948760	282	*	2.33	1.74	3.08	-1.34	0.0141	0.0479	Distal Intergenic	9	38994232	39005300	11069	2	336165	NM_200000	56540	ENSDARG00000014196	myl1	myosin, light chain 1, alkali; skeletal, fast
chr2	55455075	55455198	124	*	1.74	1.02	2.58	-1.55	0.0141	0.0479	Intron (NM_001331127/100330411, intron 10 of 11)	2	55429988	55492315	62328	1	100330411	NM_001331127	25087	ENSDARG00000096249	ap1m1	adaptor related protein complex 1 subunit mu 1
chr13	25505111	25505702	592	*	5.47	5.73	4.75	0.98	0.0141	0.0479	Promoter (<=1kb)	13	25505580	25532487	26908	1	570007	NM_001126432	0	ENSDARG00000061437	inpp5f	inositol polyphosphate-5-phosphatase F
chr7	46315881	46316100	220	*	1.78	1.09	2.59	-1.5	0.0141	0.0479	Distal Intergenic	7	46020070	46029879	9810	1	30188	NM_130995	295811	ENSDARG00000098622	ccne1	cyclin E1
chr14	44976991	44977136	146	*	1.07	0.21	1.99	-1.79	0.0141	0.0479	Distal Intergenic	14	44860433	44961040	100608	1	767630	NM_001076572	116558	ENSDARG00000063001	atp8a1	ATPase phospholipid transporting 8A1
chr1	39179252	39179456	205	*	1.53	0.76	2.4	-1.65	0.0141	0.048	Distal Intergenic	1	39373802	39373911	110	2	100310780	NR_030668	194455	ENSDARG00000085733	mir2197	microRNA mir-2197
chr21	20386710	20386970	261	*	4.41	4.71	3.48	1.23	0.0141	0.048	Promoter (2-3kb)	21	20383955	20384878	924	1	796767	NM_001099427	2755	ENSDARG00000002204	hspb11	heat shock protein, alpha-crystallin-related, b11
chr17	13052911	13053280	370	*	3.66	3.96	2.75	1.21	0.0141	0.048	Distal Intergenic	17	13019495	13026634	7140	2	100126028	NM_001105707	-26277	ENSDARG00000079636	fam177a1	family with sequence similarity 177 member A1
chr20	49835907	49836246	340	*	3.64	4.01	2.4	1.61	0.0141	0.048	Distal Intergenic	20	49895220	49928452	33233	1	768124	NM_001077270	-58974	ENSDARG00000067913	ints9	integrator complex subunit 9
chr5	5711140	5711260	121	*	3.2	2.59	3.96	-1.37	0.0141	0.048	Distal Intergenic	5	5171255	5243047	71793	2	767667	NM_001076606	-468093	ENSDARG00000091619	mvb12ba	multivesicular body subunit 12Ba
chr1	2129548	2129667	120	*	2.72	1.99	3.57	-1.58	0.0141	0.048	Exon (NM_001099998/560384, exon 2 of 8)	1	2101541	2216385	114845	1	560384	NM_001099998	28007	ENSDARG00000018460	mbnl2	muscleblind-like splicing regulator 2
chr7	52599981	52600101	121	*	1.35	0.55	2.24	-1.69	0.0141	0.048	Distal Intergenic	7	52516711	52558478	41768	2	407985	NM_214816	-41503	ENSDARG00000004714	tcf12	transcription factor 12
chr12	47506533	47506661	129	*	2.37	1.79	3.11	-1.32	0.0141	0.048	Distal Intergenic	12	47543832	47558276	14445	2	550399	NM_001017704	51615	ENSDARG00000103092	grem2b	gremlin 2, DAN family BMP antagonist b
chr2	23331627	23331952	326	*	3.41	3.75	2.29	1.47	0.014	0.0475	Distal Intergenic	2	23351451	23361940	10490	1	327035	NM_131213	-19499	ENSDARG00000010381	rnf2	ring finger protein 2
chr4	10439322	10439495	174	*	1.77	1.04	2.61	-1.57	0.014	0.0475	Intron (NM_001082867/570188, intron 1 of 5)	4	10366609	10558484	191876	1	570188	NM_001082867	72713	ENSDARG00000032799	kcnd2	potassium voltage-gated channel, Shal-related subfamily, member 2
chr20	40516098	40516230	133	*	2.32	1.63	3.13	-1.5	0.014	0.0475	Distal Intergenic	20	40475576	40487208	11633	2	140427	NM_131867	-28890	ENSDARG00000053097	hsf2	heat shock transcription factor 2
chr1_KZ115037v1_alt	72327	72462	136	*	1.53	1.96	-0.18	2.15	0.014	0.0475	Distal Intergenic	81	121346	126383	5038	1	767632	NM_001076574	-48884	ENSDARG00000018587	zgc:152658	zgc:152658
chr20	49710934	49711163	230	*	2.46	1.74	3.31	-1.57	0.014	0.0475	Distal Intergenic	20	49895220	49928452	33233	1	768124	NM_001077270	-184057	ENSDARG00000067913	ints9	integrator complex subunit 9
chr17	44502682	44502945	264	*	3.22	2.73	3.87	-1.14	0.014	0.0475	Distal Intergenic	17	44463192	44476708	13517	1	100192212	NM_001136249	39490	ENSDARG00000079686	naa30	N(alpha)-acetyltransferase 30, NatC catalytic subunit
chr18	23716610	23716751	142	*	2.63	2.08	3.35	-1.27	0.014	0.0475	Distal Intergenic	18	23868651	23875370	6720	2	30424	NM_131183	158619	ENSDARG00000040926	nr2f2	nuclear receptor subfamily 2, group F, member 2
chr22	411928	412315	388	*	5.89	6.11	5.34	0.77	0.014	0.0475	Promoter (1-2kb)	22	413349	465659	52311	1	560426	NM_001080577	-1034	ENSDARG00000019726	celsr2	cadherin, EGF LAG seven-pass G-type receptor 2
chr16	10964156	10964275	120	*	1.52	0.81	2.35	-1.54	0.014	0.0475	Distal Intergenic	16	10841061	10863041	21981	1	58125	NM_131602	123095	ENSDARG00000002758	dedd1	death effector domain-containing 1
chr9	37741254	37741481	228	*	1.91	1.23	2.71	-1.49	0.014	0.0475	Distal Intergenic	9	37754845	37839326	84482	1	556162	NM_001113576	-13364	ENSDARG00000069242	pdia5	protein disulfide isomerase family A, member 5
chr6	59819322	59819597	276	*	3.33	2.86	3.97	-1.11	0.014	0.0475	Exon (NM_001142376/100148073, exon 17 of 19)	6	59748591	59824201	75611	1	100148073	NM_001142376	70731	ENSDARG00000100119	caskb	calcium/calmodulin-dependent serine protein kinase b
chr7	33413114	33413323	210	*	1.56	0.84	2.39	-1.55	0.014	0.0475	Distal Intergenic	7	33424067	33441201	17135	1	100007670	NM_212849	-10744	ENSDARG00000068981	glceb	glucuronic acid epimerase b
chr18	24334198	24334742	545	*	2.88	2.37	3.56	-1.19	0.014	0.0475	Distal Intergenic	18	24388019	24476885	88867	2	100307110	NR_120393	142143	ENSDARG00000094853	si:ch211-147m20.3	si:ch211-147m20.3
chr13	42168020	42168238	219	*	2.58	2.9	1.59	1.31	0.014	0.0475	Distal Intergenic	13	42124568	42143625	19058	1	447829	NM_001004568	43452	ENSDARG00000052783	cdc42ep3	CDC42 effector protein (Rho GTPase binding) 3
chr2	4117996	4118116	121	*	3.18	2.6	3.91	-1.31	0.014	0.0475	Intron (NM_173286/352910, intron 12 of 21)	2	4075073	4159921	84849	1	352910	NM_173286	42923	ENSDARG00000102184	mib1	mindbomb E3 ubiquitin protein ligase 1
chr15	40647679	40647883	205	*	2.72	1.98	3.57	-1.59	0.014	0.0475	Distal Intergenic	15	40665403	40988693	323291	1	569256	NM_001077577	-17520	ENSDARG00000033840	fat3a	FAT atypical cadherin 3a
chr14	47543869	47544162	294	*	3.07	3.38	2.16	1.22	0.014	0.0475	Distal Intergenic	14	47004152	47314340	310189	2	566192	NM_001031842	-229529	ENSDARG00000040198	fstl5	follistatin-like 5
chr1	56259340	56259459	120	*	1.98	1.13	2.9	-1.77	0.014	0.0475	Intron (NM_131243/30491, intron 33 of 40)	1	56229674	56266726	37053	1	30491	NM_131243	29666	ENSDARG00000087359	c3a.2	complement component c3a, duplicate 2
chr10	34532622	34532976	355	*	3.6	3.95	2.46	1.49	0.014	0.0475	Intron (NM_001013500/541373, intron 1 of 58)	10	34426256	34734995	308740	1	541373	NM_001013500	106366	ENSDARG00000070080	nbeaa	neurobeachin a
chr6	40652	40923	272	*	4.23	3.81	4.81	-1	0.014	0.0475	Downstream (1-2kb)	6	42126	48110	5985	2	619257	NM_001033738	7187	ENSDARG00000086706	zgc:114175	zgc:114175
chr4	74976664	74976999	336	*	2.42	1.68	3.27	-1.59	0.014	0.0475	Intron (NM_001327783/100003412, intron 5 of 9)	4	74969418	74998627	29210	2	100003412	NM_001327783	21628	ENSDARG00000068830	zgc:172139	zgc:172139
chr18	6193377	6193496	120	*	1.24	0.34	2.19	-1.85	0.014	0.0475	Distal Intergenic	18	6145307	6151759	6453	2	541329	NM_001013457	-41618	ENSDARG00000091655	gcsha	glycine cleavage system protein H (aminomethyl carrier), a
chr25	3391425	3391815	391	*	2.05	1.46	2.79	-1.34	0.014	0.0475	Distal Intergenic	25	3358701	3369328	10628	1	325751	NM_001089331	32724	ENSDARG00000034933	chchd3b	coiled-coil-helix-coiled-coil-helix domain containing 3b
chr14	1646281	1646653	373	*	2.29	1.59	3.12	-1.53	0.014	0.0475	Distal Intergenic	14	1687357	1688712	1356	1	735303	NM_001045338	-40704	ENSDARG00000107444	hrh2a	histamine receptor H2a
chr16	9797306	9797426	121	*	2.35	1.8	3.06	-1.26	0.014	0.0475	Distal Intergenic	16	9779680	9786227	6548	1	436805	NM_001002532	17626	ENSDARG00000097576	zgc:92912	zgc:92912
chr24	402923	403184	262	*	3.37	3.67	2.46	1.21	0.014	0.0475	Promoter (<=1kb)	24	402493	495029	92537	1	503750	NM_001013328	430	ENSDARG00000021909	zgc:110852	zgc:110852
chr19	21815091	21815456	366	*	3.87	4.2	2.8	1.4	0.014	0.0475	Distal Intergenic	19	21698369	21716593	18225	2	100003866	NM_001159669	-98498	ENSDARG00000070809	znf516	zinc finger protein 516
chr6	11447735	11447990	256	*	2.79	3.14	1.66	1.47	0.014	0.0475	Distal Intergenic	6	11369135	11396428	27294	1	550509	NM_001017811	78600	ENSDARG00000044549	zgc:112416	zgc:112416
chr12	5650207	5650574	368	*	2.51	1.89	3.27	-1.38	0.014	0.0475	Intron (NM_001190309/100331874, intron 1 of 25)	12	5587348	5663189	75842	2	100331874	NM_001190309	12615	ENSDARG00000012824	itga3b	integrin, alpha 3b
chr16	49601578	49602170	593	*	5.92	6.15	5.31	0.85	0.014	0.0475	Promoter (<=1kb)	16	49601776	49618307	16532	1	797793	NM_001326616	0	ENSDARG00000101526	si:dkey-82o10.4	si:dkey-82o10.4
chr7	74272437	74272895	459	*	3.02	2.53	3.67	-1.15	0.014	0.0475	Distal Intergenic	7	74150839	74154873	4035	1	334597	NM_199916	121598	ENSDARG00000102012	ppp1cbl	protein phosphatase 1, catalytic subunit, beta isoform, like
chr17	33494055	33494391	337	*	2.52	1.87	3.3	-1.42	0.014	0.0475	Promoter (<=1kb)	17	33495194	33499023	3830	1	402812	NM_205577	-803	ENSDARG00000022951	pth2	parathyroid hormone 2
chr20	28012315	28012440	126	*	3.31	2.86	3.93	-1.07	0.014	0.0475	Distal Intergenic	20	27822129	27857641	35513	2	555204	NM_001044781	-154674	ENSDARG00000042390	syndig1l	synapse differentiation inducing 1-like
chr13	47914230	47914385	156	*	1.87	1.12	2.73	-1.62	0.014	0.0475	Intron (NM_001324498/394012, intron 18 of 27)	13	47863695	48058813	195119	2	394012	NM_001324498	144428	ENSDARG00000032435	itga9	integrin, alpha 9
chr19	37820234	37820443	210	*	1.8	1.16	2.58	-1.42	0.014	0.0475	Exon (NM_001122760/557991, exon 22 of 27)	19	37620342	37842003	221662	1	557991	NM_001122760	199892	ENSDARG00000061479	thsd7aa	thrombospondin, type I, domain containing 7Aa
chr1	58148874	58149047	174	*	1.2	1.65	-0.66	2.3	0.014	0.0475	Distal Intergenic	1	58106338	58111826	5489	2	566185	NM_001145592	-37048	ENSDARG00000094433	caspbl	caspase b, like
chr20	33529168	33529287	120	*	1.91	1.24	2.72	-1.48	0.014	0.0475	Intron (NM_001127468/100034551, intron 11 of 15)	20	33519435	33530425	10991	1	100034551	NM_001127468	9733	ENSDARG00000042182	drc1	dynein regulatory complex subunit 1 homolog (Chlamydomonas)
chr25	32644650	32644940	291	*	2.44	2.83	1.06	1.77	0.014	0.0476	Intron (NM_001123047/100144551, intron 22 of 29)	25	32530976	32739728	208753	1	100144551	NM_001123047	113674	ENSDARG00000023104	scaper	S-phase cyclin A-associated protein in the ER
chr18	20730161	20730346	186	*	2.37	2.78	0.83	1.96	0.014	0.0476	Distal Intergenic	18	20677184	20722548	45365	1	559080	NM_001044883	52977	ENSDARG00000041107	cftr	CF transmembrane conductance regulator
chr7	11251313	11251643	331	*	3.37	3.69	2.4	1.28	0.014	0.0476	Distal Intergenic	7	11376323	11384279	7957	2	791222	NM_001080704	132636	ENSDARG00000063030	mesd	mesoderm development LRP chaperone
chr7	389299	389556	258	*	2.28	1.68	3.02	-1.35	0.014	0.0476	Distal Intergenic	7	427503	624158	196656	1	560420	NM_001079984	-37947	NA	nrxn2b	neurexin 2b
chr23	40178809	40179044	236	*	2.45	2.81	1.24	1.57	0.014	0.0476	Intron (NM_001005936/449665, intron 11 of 13)	23	40133136	40186528	53393	1	449665	NM_001005936	45673	ENSDARG00000102026	gpsm2l	G protein signaling modulator 2, like
chr25	33333197	33333318	122	*	2.94	2.21	3.78	-1.57	0.014	0.0476	Distal Intergenic	25	33256092	33266375	10284	1	553619	NM_001020593	77105	ENSDARG00000040803	lactb	lactamase, beta
chr16	40240024	40240223	200	*	2.63	2.03	3.37	-1.35	0.014	0.0476	Distal Intergenic	16	40301073	40339027	37955	1	100007702	NM_001017358	-60850	ENSDARG00000070081	rspo3	R-spondin 3
chr6	23000657	23000776	120	*	1.08	0.2	2.01	-1.8	0.014	0.0476	Promoter (1-2kb)	6	22958385	23001861	43477	2	321700	NM_001030063	1085	ENSDARG00000026767	nol11	nucleolar protein 11
chr16	51976450	51976847	398	*	2.44	1.89	3.15	-1.26	0.014	0.0476	Distal Intergenic	16	51950504	51966836	16333	2	323645	NM_199647	-9614	ENSDARG00000009480	pdcl	phosducin-like
chr6	21558411	21558511	101	*	1.43	0.74	2.24	-1.49	0.014	0.0476	Distal Intergenic	6	21576164	21582444	6281	2	795882	NM_001326600	23933	ENSDARG00000052428	si:dkey-43k4.3	si:dkey-43k4.3
chr23	35990190	35990517	328	*	4.25	3.82	4.85	-1.02	0.014	0.0476	Exon (NM_001110166/334971, exon 9 of 15)	23	35981841	36003282	21442	2	334971	NM_001110166	12765	ENSDARG00000036695	calcoco1a	calcium binding and coiled-coil domain 1a
chr18	49917298	49917788	491	*	4.1	4.37	3.31	1.07	0.014	0.0476	Distal Intergenic	18	49969568	50040162	70595	1	724012	NM_001045317	-51780	ENSDARG00000012005	mob2b	MOB kinase activator 2b
chr17	1317991	1318136	146	*	1.93	2.36	0.27	2.09	0.014	0.0476	Distal Intergenic	17	1323699	1355792	32094	1	407989	NM_214820	-5563	ENSDARG00000099517	adss1	adenylosuccinate synthase 1
chr25	32157486	32157906	421	*	4.77	5.06	3.93	1.13	0.014	0.0476	Distal Intergenic	25	32273127	32292494	19368	2	494096	NM_001008639	134588	NA	zgc:101540	zgc:101540
chr2	9648365	9648745	381	*	2.79	2.22	3.51	-1.29	0.014	0.0476	Promoter (1-2kb)	2	9629556	9646857	17302	2	777747	NM_001077791	-1508	ENSDARG00000038981	zgc:153615	zgc:153615
chr5	21811881	21812213	333	*	2.63	1.99	3.4	-1.42	0.014	0.0476	Distal Intergenic	5	21853317	21888239	34923	2	559803	NM_001099997	76026	ENSDARG00000012776	smarca1	SWI/SNF related, matrix associated, actin dependent regulator of chromatin, subfamily a, member 1
chr5	11082561	11082680	120	*	1.86	1.2	2.65	-1.44	0.014	0.0476	Distal Intergenic	5	10766558	10946232	179675	2	403306	NM_203478	-136329	ENSDARG00000090035	rtn4r	reticulon 4 receptor
chr4	7251975	7252186	212	*	1.24	0.39	2.16	-1.77	0.014	0.0476	Distal Intergenic	4	7391354	7406259	14906	1	449825	NM_001005998	-139168	ENSDARG00000099870	tnni4a	troponin I4a
chr23	26420286	26420595	310	*	3.4	3.74	2.31	1.43	0.014	0.0476	Intron (NM_001365193/561689, intron 1 of 20)	23	26230769	26489412	258644	2	561689	NM_001365193	68817	ENSDARG00000101869	magi3a	membrane associated guanylate kinase, WW and PDZ domain containing 3a
chr24	6770305	6770929	625	*	3.25	2.79	3.88	-1.09	0.014	0.0476	Distal Intergenic	24	6673201	6678463	5263	2	402794	NM_001305613	-91842	ENSDARG00000031248	enkur	enkurin, TRPC channel interacting protein
chr21	20341972	20342141	170	*	1.19	0.34	2.11	-1.77	0.014	0.0476	Promoter (<=1kb)	21	20339690	20342022	2333	2	335651	NM_199965	0	ENSDARG00000044684	rbp4l	retinol binding protein 4, like
chr13	50860982	50861175	194	*	1.32	0.43	2.26	-1.83	0.014	0.0476	Intron (NM_001014817/544653, intron 7 of 10)	13	50778182	51021917	243736	1	544653	NM_001014817	82800	ENSDARG00000104792	dntt	deoxynucleotidyltransferase, terminal
chr20	24542336	24542705	370	*	2.27	1.57	3.09	-1.52	0.014	0.0476	Distal Intergenic	20	24152468	24182761	30294	2	553788	NM_001020750	-359575	ENSDARG00000020469	map3k7	mitogen-activated protein kinase kinase kinase 7
chr2	24510979	24511328	350	*	4.43	4.75	3.45	1.3	0.014	0.0476	Distal Intergenic	2	24507594	24509698	2105	1	406307	NM_213034	3385	ENSDARG00000035860	rps28	ribosomal protein S28
chr1	39363860	39364529	670	*	4.55	4.89	3.47	1.42	0.014	0.0476	Distal Intergenic	1	39373802	39373911	110	2	100310780	NR_030668	9382	ENSDARG00000085733	mir2197	microRNA mir-2197
chr24	23178424	23178543	120	*	1.99	1.13	2.92	-1.79	0.014	0.0476	Distal Intergenic	24	22759451	22769992	10542	1	555852	NM_001199998	418973	ENSDARG00000094602	si:dkey-7n6.2	si:dkey-7n6.2
chr12	3316332	3316492	161	*	4.21	3.44	5.09	-1.65	0.014	0.0476	Distal Intergenic	12	3301149	3310677	9529	1	790919	NM_001080066	15183	ENSDARG00000020371	g6pc3	glucose 6 phosphatase, catalytic, 3
chr2	19659634	19659829	196	*	3.33	3.64	2.4	1.24	0.014	0.0476	Distal Intergenic	2	19640963	19649341	8379	1	393729	NM_200756	18671	ENSDARG00000057315	rwdd3	RWD domain containing 3
chr10	11548102	11548332	231	*	1.35	0.53	2.25	-1.71	0.014	0.0476	Distal Intergenic	10	11398203	11501423	103221	1	394078	NM_201103	149899	ENSDARG00000043727	cwc27	CWC27 spliceosome associated cyclophilin
chr7	21272722	21272930	209	*	3.86	4.18	2.87	1.31	0.014	0.0476	Promoter (<=1kb)	7	21273142	21309854	36713	1	554550	NM_001017564	-212	ENSDARG00000036445	serpinh2	serine (or cysteine) peptidase inhibitor, clade H, member 2
chr13	35652778	35652963	186	*	2.18	2.57	0.83	1.73	0.014	0.0476	Distal Intergenic	13	35750708	35760917	10210	2	368331	NM_199432	107954	ENSDARG00000086309	erlec1	endoplasmic reticulum lectin 1
chr21	37812275	37812397	123	*	3.36	2.9	3.98	-1.09	0.014	0.0476	Distal Intergenic	21	37744536	37745651	1116	1	446120	NM_001007217	67739	NA	gpr34l	G protein-coupled receptor 34 like
chr6	59604399	59604640	242	*	2.05	2.44	0.62	1.82	0.014	0.0476	Distal Intergenic	6	59426150	59505589	79440	2	352930	NM_178296	-98810	ENSDARG00000101244	gli1	GLI family zinc finger 1
chr10	1035088	1035439	352	*	3.46	3.73	2.72	1.01	0.014	0.0476	Intron (NM_001099984/557316, intron 1 of 11)	10	883516	1107794	224279	1	557316	NM_001099984	151572	NA	unc5c	unc-5 netrin receptor C
chr8	49988119	49988274	156	*	3.11	2.62	3.77	-1.15	0.014	0.0476	Intron (NM_001034981/567861, intron 2 of 19)	8	49975173	50037558	62386	1	567861	NM_001034981	12946	ENSDARG00000057465	gfpt1	glutamine--fructose-6-phosphate transaminase 1
chr2	20777909	20778034	126	*	2.22	1.6	2.98	-1.38	0.014	0.0476	Distal Intergenic	2	20793982	20812058	18077	1	336351	NM_212753	-15948	ENSDARG00000010482	prg4a	proteoglycan 4a
chr17	11334590	11334913	324	*	4.4	4.69	3.56	1.13	0.014	0.0476	Intron (NM_001258228/100884142, intron 9 of 31)	17	11073415	11368149	294735	2	100884142	NM_001258228	33236	ENSDARG00000097772	si:ch211-185a18.2	si:ch211-185a18.2
chr12	21821532	21821653	122	*	2.25	1.7	2.96	-1.27	0.014	0.0476	Distal Intergenic	12	21684291	21688087	3797	1	553709	NM_001020680	137241	ENSDARG00000032985	mrpl27	mitochondrial ribosomal protein L27
chr12	2522309	2522679	371	*	3.78	4.12	2.7	1.41	0.014	0.0476	Promoter (<=1kb)	12	2499698	2522503	22806	2	65236	NM_131721	0	ENSDARG00000009870	mapk8b	mitogen-activated protein kinase 8b
chr20	8243185	8243682	498	*	2.62	2	3.38	-1.39	0.014	0.0476	Intron (NM_001040685/692351, intron 3 of 25)	20	8122709	8419057	296349	2	692351	NM_001040685	175375	ENSDARG00000059939	dab1a	DAB adaptor protein 1a
chr24	38092900	38093299	400	*	4.03	3.47	4.75	-1.29	0.014	0.0476	Exon (NM_001114915/100141350, exon 3 of 3)	24	38092611	38097305	4695	2	100141350	NM_001114915	4006	ENSDARG00000042613	crp3	C-reactive protein 3
chr4	13133112	13133255	144	*	1.74	1.06	2.55	-1.49	0.014	0.0476	Intron (NM_001044851/558006, intron 6 of 23)	4	13035935	13255700	219766	2	558006	NM_001044851	122445	ENSDARG00000015053	grip1	glutamate receptor interacting protein 1
chr13	3178659	3178847	189	*	2.45	2.94	0	2.94	0.014	0.0476	Distal Intergenic	13	3109064	3155244	46181	2	559418	NM_001161598	-23415	ENSDARG00000035161	pkdcca	protein kinase domain containing, cytoplasmic a
chr12	17252652	17252771	120	*	1.73	1.07	2.52	-1.46	0.014	0.0476	Intron (NM_001002607/436880, intron 4 of 6)	12	17201564	17323341	121778	1	436880	NM_001002607	51088	ENSDARG00000012453	rnls	renalase, FAD-dependent amine oxidase
chr18_KZ115555v1_alt	294625	294751	127	*	4.07	3.68	4.63	-0.96	0.014	0.0476	Distal Intergenic	737	167341	289723	122383	2	407655	NM_001039460	-4902	ENSDARG00000041572	zfpm1	zinc finger protein, FOG family member 1
chr2	4727541	4727661	121	*	3.63	3.19	4.25	-1.06	0.014	0.0476	Downstream (1-2kb)	2	4729155	4787566	58412	2	559119	NM_001347881	59905	ENSDARG00000104409	tnk2b	tyrosine kinase, non-receptor, 2b
chr23_KZ115674v1_alt	235128	235248	121	*	1.93	1.03	2.87	-1.84	0.014	0.0476	Intron (NM_001003833/322056, intron 13 of 20)	876	222009	307373	85365	2	322056	NM_001003833	72125	ENSDARG00000013838	sulf2b	sulfatase 2b
chr1	47501621	47501749	129	*	4.11	3.7	4.68	-0.97	0.014	0.0476	Promoter (1-2kb)	1	47499913	47513484	13572	1	393360	NM_200389	1708	ENSDARG00000007734	stn1	STN1 subunit of CST complex
chr16	8517702	8517980	279	*	4.22	4.5	3.41	1.09	0.014	0.0476	Distal Intergenic	16	8531417	8663497	132081	2	497312	NM_001289913	145517	ENSDARG00000091006	cobl	cordon-bleu WH2 repeat protein
chr5	63225888	63226180	293	*	2.84	2.32	3.52	-1.2	0.014	0.0476	Distal Intergenic	5	63294865	63302916	8052	2	336623	NM_001089344	76736	ENSDARG00000045262	gsnb	gelsolin b
chr21	11554296	11554510	215	*	1.37	0.57	2.27	-1.7	0.014	0.0477	Distal Intergenic	21	11560182	11563406	3225	1	677754	NM_001040049	-5672	ENSDARG00000044797	cd8a	CD8a molecule
chr25	19723647	19723808	162	*	3.61	2.28	4.75	-2.47	0.014	0.0477	Distal Intergenic	25	19734038	19739966	5929	1	447883	NM_001004622	-10230	ENSDARG00000045824	zgc:101783	zgc:101783
chr9	45418752	45419210	459	*	4.02	4.33	3.05	1.28	0.014	0.0477	Distal Intergenic	9	45591229	45603006	11778	2	335309	NM_001099232	183796	ENSDARG00000060682	agr1	anterior gradient 1
chr19	43760391	43760580	190	*	2.69	3.09	1.22	1.87	0.014	0.0477	Promoter (2-3kb)	19	43740698	43757488	16791	2	406648	NM_213339	-2903	ENSDARG00000039980	ppt1	palmitoyl-protein thioesterase 1 (ceroid-lipofuscinosis, neuronal 1, infantile)
chr7	43751078	43751432	355	*	2.33	1.75	3.06	-1.31	0.014	0.0477	Distal Intergenic	7	43761189	43787461	26273	2	30461	NM_131214	36029	ENSDARG00000021442	cdh11	cadherin 11, type 2, OB-cadherin (osteoblast)
chr20	4428526	4428782	257	*	2.13	1.5	2.9	-1.4	0.014	0.0477	Distal Intergenic	20	4221978	4248785	26808	1	767791	NM_001076758	206548	ENSDARG00000099252	ipcef1	interaction protein for cytohesin exchange factors 1
chr10	43974362	43974833	472	*	3.9	4.21	2.94	1.27	0.014	0.0477	Distal Intergenic	10	43936250	43964028	27779	2	445325	NM_001003782	-10334	ENSDARG00000036031	sept5b	septin 5b
chr4	74305609	74305810	202	*	2.01	1.34	2.81	-1.47	0.014	0.0477	Exon (NM_001316727/100149130, exon 14 of 30)	4	74271065	74367912	96848	2	100149130	NM_001316727	62102	ENSDARG00000076624	ptprb	protein tyrosine phosphatase receptor type b
chr17	30034095	30034337	243	*	4.27	3.58	5.09	-1.51	0.014	0.0477	Distal Intergenic	17	29798216	29877336	79121	2	405890	NM_212954	-156759	ENSDARG00000004861	esrrga	estrogen-related receptor gamma a
chr13	15831063	15831371	309	*	3.88	4.2	2.92	1.28	0.014	0.0477	Intron (NM_200953/393928, intron 1 of 14)	13	15816860	15897720	80861	1	393928	NM_200953	14203	ENSDARG00000009796	klc1a	kinesin light chain 1a
chr10	34909215	34909418	204	*	3.61	3.91	2.68	1.23	0.014	0.0477	Exon (NM_212818/404206, exon 8 of 9)	10	34908336	34915894	7559	2	404206	NM_212818	6476	ENSDARG00000043236	ccna1	cyclin A1
chr6	44012192	44012625	434	*	4.88	5.15	4.1	1.04	0.014	0.0477	Intron (NM_001012373/497613, intron 4 of 5)	6	44008115	44044311	36197	2	497613	NM_001012373	31686	ENSDARG00000053459	rybpb	RING1 and YY1 binding protein b
chr3	3481360	3481491	132	*	1.55	0.83	2.38	-1.55	0.014	0.0477	Distal Intergenic	3	3432960	3448095	15136	2	562067	NM_001201405	-33265	ENSDARG00000008835	si:dkey-46g23.5	si:dkey-46g23.5
chr4	77943928	77944542	615	*	4.78	5.13	3.67	1.46	0.014	0.0477	Exon (NM_207069/404601, exon 4 of 11)	4	77933079	77954402	21324	1	404601	NM_207069	10849	ENSDARG00000078014	pacsin2	protein kinase C and casein kinase substrate in neurons 2
chr15	13703994	13704115	122	*	2.74	3.07	1.72	1.35	0.014	0.0477	Distal Intergenic	15	13984879	13986763	1885	1	564559	NM_001089404	-280764	ENSDARG00000103720	zgc:162730	zgc:162730
chr11	23089613	23090050	438	*	3.9	4.19	3.05	1.15	0.014	0.0477	Distal Intergenic	11	22993029	23080960	87932	2	768304	NM_001077467	-8653	ENSDARG00000044902	atp2b4	ATPase plasma membrane Ca2+ transporting 4
chr22	10931993	10932156	164	*	3.22	2.6	3.99	-1.39	0.014	0.0477	Exon (NM_001123229/245700, exon 11 of 21)	22	10927871	11053148	125278	2	245700	NM_001123229	120992	ENSDARG00000071524	insrb	insulin receptor b
chr20	34359783	34360090	308	*	3.74	4.1	2.54	1.55	0.014	0.0477	Distal Intergenic	20	34326872	34341185	14314	1	387591	NM_199279	32911	ENSDARG00000031100	ivns1abpa	influenza virus NS1A binding protein a
chr5	51875799	51875948	150	*	2.47	1.87	3.21	-1.34	0.014	0.0477	Intron (NM_001079985/560687, intron 10 of 12)	5	51848841	51881422	32582	1	560687	NM_001079985	26958	ENSDARG00000061379	cmya5	cardiomyopathy associated 5
chr23	44769573	44769841	269	*	2.99	3.34	1.84	1.5	0.014	0.0477	Distal Intergenic	23	44732873	44762193	29321	1	64269	NM_131669	36700	ENSDARG00000099203	atp1b2a	ATPase Na+/K+ transporting subunit beta 2a
chr13	23588751	23588952	202	*	2.09	1.49	2.83	-1.34	0.014	0.0477	Intron (NM_214782/407653, intron 6 of 12)	13	23488297	23612326	124030	2	407653	NM_214782	23374	ENSDARG00000052721	prim2	DNA primase subunit 2
chr21	44978268	44978442	175	*	1.59	0.85	2.43	-1.59	0.014	0.0477	Intron (NM_001031843/571664, intron 5 of 17)	21	44857293	45117822	260530	1	571664	NM_001031843	120975	ENSDARG00000044319	fstl4	follistatin-like 4
chr21	16102343	16102656	314	*	5.72	5.99	4.99	1	0.014	0.0477	Promoter (<=1kb)	21	16089386	16102464	13079	2	564476	NM_001130782	0	ENSDARG00000076552	zgc:193801	zgc:193801
chr10	1478191	1478319	129	*	1.32	0.53	2.2	-1.67	0.014	0.0477	Distal Intergenic	10	1396925	1413737	16813	1	79379	NM_131732	81266	ENSDARG00000039959	gdnfa	glial cell derived neurotrophic factor a
chr1	19252800	19253234	435	*	3.34	3.71	2.08	1.64	0.014	0.0477	Distal Intergenic	1	19205211	19233890	28680	2	100073332	NM_001098769	-18910	ENSDARG00000019945	ptprdb	protein tyrosine phosphatase receptor type Db
chr24	2417084	2417446	363	*	3.17	2.71	3.8	-1.09	0.014	0.0477	Distal Intergenic	24	2462158	2467479	5322	2	101886351	NM_001310488	50033	ENSDARG00000090649	ly86	lymphocyte antigen 86
chr15	39359143	39359331	189	*	1.25	0.47	2.13	-1.66	0.014	0.0477	Intron (NM_001309824/30769, intron 7 of 28)	15	39277653	39819928	542276	2	30769	NM_001365166	460597	ENSDARG00000026784	robo1	roundabout, axon guidance receptor, homolog 1 (Drosophila)
chr2	15154149	15154421	273	*	4.04	4.35	3.08	1.27	0.014	0.0477	Exon (NM_200111/378998, exon 3 of 23)	2	15128411	15197915	69505	1	378998	NM_200111	25738	ENSDARG00000017748	arhgap29b	Rho GTPase activating protein 29b
chr12	910824	911180	357	*	4.59	3.93	5.38	-1.46	0.0139	0.0472	Distal Intergenic	12	847188	850369	3182	2	406245	NM_212974	-60455	ENSDARG00000021372	tob1b	transducer of ERBB2, 1b
chr1	26368895	26369140	246	*	2.95	3.29	1.85	1.44	0.0139	0.0472	Distal Intergenic	1	26391755	26398274	6520	2	402961	NM_205662	29134	ENSDARG00000009685	ppa2	inorganic pyrophosphatase 2
chr2	57517990	57518318	329	*	2.9	3.2	2.01	1.19	0.0139	0.0472	Distal Intergenic	2	57447105	57476462	29358	2	393314	NM_001242942	-41528	ENSDARG00000042215	pias4b	protein inhibitor of activated STAT, 4b
chr4	8374371	8374672	302	*	4.06	4.41	2.91	1.5	0.0139	0.0472	Distal Intergenic	4	8532174	8665469	133296	1	30105	NM_001362273	-157502	ENSDARG00000102464	wnt5b	wingless-type MMTV integration site family, member 5b
chr13	33168452	33168659	208	*	3.86	3.12	4.7	-1.58	0.0139	0.0472	Promoter (2-3kb)	13	33155428	33170728	15301	2	449806	NM_001005979	2069	ENSDARG00000039273	fbln5	fibulin 5
chr12	13224593	13224712	120	*	2.22	1.32	3.17	-1.85	0.0139	0.0472	Distal Intergenic	12	13205955	13223449	17495	1	327301	NM_212710	18638	ENSDARG00000071566	ppp1cab	protein phosphatase 1, catalytic subunit, alpha isozyme b
chr9	26675116	26675415	300	*	2.69	3.04	1.55	1.49	0.0139	0.0472	Distal Intergenic	9	26103814	26123706	19893	1	30219	NM_131023	571302	ENSDARG00000020164	efnb2a	ephrin-B2a
chr13	20020084	20020203	120	*	2.03	1.39	2.82	-1.43	0.0139	0.0472	Distal Intergenic	13	19766896	19799776	32881	2	436809	NM_001002536	-220308	ENSDARG00000039699	fam204a	family with sequence similarity 204 member A
chr15	33711170	33711290	121	*	1.59	0.81	2.46	-1.65	0.0139	0.0472	Intron (NM_199743/326652, intron 3 of 3)	15	33704751	33734092	29342	2	326652	NM_199743	22802	ENSDARG00000102636	trmt9b	tRNA methyltransferase 9B
chr15	26238493	26238735	243	*	1.98	1.34	2.77	-1.43	0.0139	0.0473	Intron (NM_203480/403308, intron 1 of 2)	15	26091399	26402301	310903	1	403308	NM_203480	147094	ENSDARG00000098528	rtn4rl1b	reticulon 4 receptor-like 1b
chr13	27034823	27034944	122	*	2.48	1.93	3.19	-1.26	0.0139	0.0473	Intron (NM_001320191/100141348, intron 2 of 3)	13	27000394	27038407	38014	2	100141348	NM_001320191	3463	ENSDARG00000039497	ccdc85a	coiled-coil domain containing 85A
chr9	30947145	30947314	170	*	2.17	1.56	2.92	-1.36	0.0139	0.0473	Intron (NM_001080673/791191, intron 1 of 10)	9	30890549	31062704	172156	1	791191	NM_001080673	56596	ENSDARG00000069440	dachd	dachshund d
chr18	2272544	2272767	224	*	1.78	2.21	0	2.21	0.0139	0.0473	Distal Intergenic	18	2228737	2266587	37851	1	570907	NM_001030257	43807	ENSDARG00000103935	rab27a	RAB27A, member RAS oncogene family
chr11	30153861	30154008	148	*	2.02	2.4	0.64	1.76	0.0139	0.0473	Distal Intergenic	11	30162387	30231526	69140	1	559341	NM_001130771	-8379	ENSDARG00000015240	cdkl5	cyclin-dependent kinase-like 5
chr8	13575066	13575196	131	*	2.58	1.77	3.47	-1.71	0.0139	0.0473	Promoter (<=1kb)	8	13572531	13574764	2234	2	100002020	NM_001128552	-302	ENSDARG00000054373	b3gnt3.2	UDP-GlcNAc:betaGal beta-1,3-N-acetylglucosaminyltransferase 3, tendem duplicate 2
chr25	36552095	36552547	453	*	2.76	2.22	3.47	-1.25	0.0139	0.0473	Distal Intergenic	25	36488164	36492779	4616	2	321806	NM_213100	-59316	ENSDARG00000031138	irx3b	iroquois homeobox 3b
chr2	49421591	49421731	141	*	3.36	3.71	2.19	1.52	0.0139	0.0473	Intron (NM_001277094/562258, intron 1 of 9)	2	49417900	49447226	29327	1	562258	NM_001277094	3691	ENSDARG00000017780	rorcb	RAR-related orphan receptor C b
chr9	33122114	33122328	215	*	3.55	3.83	2.73	1.1	0.0139	0.0473	Promoter (<=1kb)	9	33116078	33121571	5494	2	100002675	NM_001326555	-543	ENSDARG00000094518	si:ch211-125e6.8	si:ch211-125e6.8
chr8	22145609	22145774	166	*	0.88	-0.01	1.82	-1.83	0.0139	0.0473	Distal Intergenic	8	22277215	22282962	5748	1	373130	NM_194404	-131441	ENSDARG00000009748	dffb	DNA fragmentation factor, beta polypeptide (caspase-activated DNase)
chrUn_KN150104v1	899	1032	134	*	1.63	0.93	2.45	-1.52	0.0139	0.0473	Distal Intergenic	1317	24746	51248	26503	2	550574	NM_001017876	50216	NA	fsip1	fibrous sheath interacting protein 1
chr11	23178301	23178816	516	*	4.37	4.63	3.63	0.99	0.0139	0.0473	Distal Intergenic	11	23205912	23219327	13416	2	445189	NM_001003583	40511	ENSDARG00000014358	optc	opticin
chr8	4737253	4737487	235	*	3.27	3.62	2.09	1.53	0.0139	0.0473	Exon (NM_213386/406695, exon 17 of 18)	8	4734005	4760691	26687	2	406695	NM_213386	23204	ENSDARG00000043720	cdc45	CDC45 cell division cycle 45 homolog (S. cerevisiae)
chr6	10124100	10124250	151	*	1.99	1.29	2.82	-1.53	0.0139	0.0473	Distal Intergenic	6	10037273	10056640	19368	1	406299	NM_213026	86827	ENSDARG00000005359	sucla2	succinate-CoA ligase, ADP-forming, beta subunit
chr7	63988376	63988655	280	*	2.07	1.47	2.81	-1.34	0.0139	0.0473	Distal Intergenic	7	63325026	63573056	248031	1	555504	NM_001365653	663350	ENSDARG00000060610	pcdh7b	protocadherin 7b
chr24	38177923	38178094	172	*	3.29	3.63	2.15	1.48	0.0139	0.0473	Promoter (<=1kb)	24	38177965	38178027	63	2	100033748	NR_030518	0	ENSDARG00000098887	rny2	Ro-associated Y RNA 2
chr2	50423368	50423489	122	*	6.2	5.95	6.6	-0.65	0.0139	0.0473	Distal Intergenic	2	50391331	50409763	18433	1	393746	NM_200773	32037	ENSDARG00000044501	viml	vimentin like
chr4	818981	819095	115	*	1.79	1.08	2.62	-1.54	0.0139	0.0473	Distal Intergenic	4	798701	815852	17152	2	553410	NM_001020515	-3129	ENSDARG00000059311	dpysl5b	dihydropyrimidinase like 5b
chr5	25577071	25577171	101	*	1.88	1.13	2.74	-1.61	0.0139	0.0473	Downstream (1-2kb)	5	25578181	25583125	4945	2	334724	NM_181758	5954	ENSDARG00000026726	anxa1a	annexin A1a
chr17	47574940	47575059	120	*	4.14	3.68	4.78	-1.1	0.0139	0.0473	Distal Intergenic	17	47102957	47178983	76027	1	449988	NM_001362516	471983	ENSDARG00000104663	zgc:103755	zgc:103755
chr8	7344297	7344525	229	*	1.38	0.63	2.24	-1.61	0.0139	0.0473	Exon (NM_001076658/767720, exon 10 of 12)	8	7320321	7348345	28025	1	767720	NM_001076658	23976	ENSDARG00000063292	ssuh2rs1	ssu-2 homolog, related sequence 1
chr18	44166338	44166589	252	*	2.01	1.37	2.79	-1.42	0.0139	0.0473	Distal Intergenic	18	44053013	44129028	76016	2	280652	NM_001081628	-37310	ENSDARG00000061328	cdon	cell adhesion associated, oncogene regulated
chr5	23519396	23519584	189	*	3.16	3.51	2.01	1.5	0.0139	0.0473	3' UTR	5	23518291	23574225	55935	2	334561	NM_001099739	54641	ENSDARG00000010752	acsl4b	acyl-CoA synthetase long chain family member 4b
chr5	1362080	1362902	823	*	3.89	4.23	2.8	1.42	0.0139	0.0473	Intron (NM_001245965/100307098, intron 15 of 22)	5	1278092	1421088	142997	1	100307098	NM_001245965	83988	ENSDARG00000010042	dnm1a	dynamin 1a
chr13	49501169	49501695	527	*	4.6	4.92	3.59	1.33	0.0139	0.0473	Distal Intergenic	13	49442073	49444636	2564	2	335866	NM_199981	-56533	ENSDARG00000004702	irf2bp2a	interferon regulatory factor 2 binding protein 2a
chr25	27277178	27277324	147	*	3.19	2.61	3.92	-1.32	0.0139	0.0473	Distal Intergenic	25	27410352	27491741	81390	1	566847	NM_001245960	-133028	ENSDARG00000079915	pot1	protection of telomeres 1 homolog
chr14	42341656	42341932	277	*	2.28	1.61	3.08	-1.47	0.0139	0.0473	Distal Intergenic	14	42172501	42179348	6848	1	562031	NM_001115099	169155	ENSDARG00000052494	pcdh18b	protocadherin 18b
chr22	13955257	13955619	363	*	2.04	1.33	2.86	-1.53	0.0139	0.0473	Distal Intergenic	22	13978180	13979407	1228	1	550444	NM_001017749	-22561	ENSDARG00000057606	arl4ca	ADP-ribosylation factor-like 4Ca
chr1	8435965	8436084	120	*	2.8	2.09	3.63	-1.54	0.0139	0.0473	Distal Intergenic	1	8415983	8428760	12778	2	570094	NM_001320491	-7205	ENSDARG00000025034	syngr3b	synaptogyrin 3b
chr16	28098616	28099299	684	*	2.82	2.24	3.56	-1.32	0.0139	0.0473	Distal Intergenic	16	28270112	28371330	101219	1	777708	NM_001077756	-170813	ENSDARG00000028715	mindy3	MINDY lysine 48 deubiquitinase 3
chr12	39793568	39793829	262	*	3.36	3.69	2.34	1.34	0.0139	0.0473	Distal Intergenic	12	38807645	38854965	47321	1	100151075	NM_001099246	985923	ENSDARG00000074041	abca5	ATP-binding cassette, sub-family A (ABC1), member 5
chr20	36095734	36096026	293	*	1.77	1.03	2.63	-1.59	0.0139	0.0473	Intron (NM_001030185/564097, intron 2 of 2)	20	36068122	36107226	39105	2	564097	NM_001030185	11200	ENSDARG00000008249	ptchd4	patched domain containing 4
chr6	31910295	31910455	161	*	1.73	0.99	2.58	-1.6	0.0139	0.0473	Distal Intergenic	6	32010183	32025200	15018	2	394000	NM_201025	114745	ENSDARG00000013561	pgm1	phosphoglucomutase 1
chr19	30438385	30438563	179	*	3.7	2.86	4.61	-1.75	0.0139	0.0473	Exon (NM_213186/406467, exon 17 of 27)	19	30428898	30447637	18740	2	406467	NM_213186	9074	ENSDARG00000031795	abcf1	ATP-binding cassette, sub-family F (GCN20), member 1
chr21	22423817	22423936	120	*	3.69	2.24	4.87	-2.62	0.0139	0.0473	Promoter (<=1kb)	21	22423330	22428325	4996	1	550473	NM_001017776	487	ENSDARG00000003414	capslb	calcyphosine-like b
chr6	43540319	43540621	303	*	3.54	3.91	2.27	1.64	0.0139	0.0473	Distal Intergenic	6	43491635	43498996	7362	2	107990272	NM_001328152	-41323	ENSDARG00000091832	si:dkey-58f6.2	si:dkey-58f6.2
chr16	29558881	29559143	263	*	5.29	5.57	4.48	1.09	0.0139	0.0473	Intron (NM_001256731/100317933, intron 2 of 3)	16	29555801	29577708	21908	1	100317933	NM_001256731	3080	ENSDARG00000061644	ensab	endosulfine alpha b
chr1	16737058	16737201	144	*	1.22	0.28	2.18	-1.9	0.0139	0.0473	Distal Intergenic	1	16675055	16688965	13911	2	550491	NM_001017793	-48093	ENSDARG00000056504	frg1	FSHD region gene 1
chr12	37199720	37199917	198	*	1.24	0.49	2.09	-1.59	0.0139	0.0473	Distal Intergenic	12	37275333	37299671	24339	2	678607	NM_001040355	99754	ENSDARG00000060457	pmp22b	peripheral myelin protein 22b
chr15	36494105	36494398	294	*	1.73	2.17	-0.09	2.26	0.0139	0.0473	Distal Intergenic	15	36556503	36727462	170960	2	692352	NM_001040687	233064	ENSDARG00000060758	nphs1	NPHS1 adhesion molecule, nephrin
chr15	35635397	35635597	201	*	2.25	1.65	2.99	-1.35	0.0139	0.0473	Distal Intergenic	15	35933094	35944902	11809	1	550277	NM_001017614	-297497	ENSDARG00000021046	rhbdd1	rhomboid domain containing 1
chr11	32792489	32792848	360	*	3.62	3.97	2.42	1.55	0.0139	0.0473	Distal Intergenic	11	32577554	32722361	144808	2	561336	NM_001160822	-70128	ENSDARG00000027041	pcdh17	protocadherin 17
chr1	2841049	2841168	120	*	2.67	1.94	3.52	-1.57	0.0139	0.0474	Intron (NM_001109719/571904, intron 2 of 9)	1	2712956	3036015	323060	1	571904	NM_001109719	128093	ENSDARG00000103156	gpc6a	glypican 6a
chr16	45643630	45643840	211	*	1.78	1.01	2.65	-1.64	0.0139	0.0474	Exon (NM_001326467/100151149, exon 16 of 21)	16	45456066	45689083	233018	1	100151149	NM_001326467	187564	ENSDARG00000069765	syngap1b	synaptic Ras GTPase activating protein 1b
chr24	35377047	35377159	113	*	1.51	0.82	2.33	-1.51	0.0139	0.0474	Distal Intergenic	24	35387517	35393533	6017	1	494038	NM_001008581	-10358	ENSDARG00000040046	snai2	snail family zinc finger 2
chr20	49099922	49100341	420	*	2.6	1.93	3.4	-1.47	0.0139	0.0474	Exon (NM_200946/393920, exon 12 of 14)	20	49081967	49103319	21353	1	393920	NM_200946	17955	ENSDARG00000007901	crnkl1	crooked neck pre-mRNA splicing factor 1
chr14	51038994	51039256	263	*	4.61	4.87	3.86	1.01	0.0139	0.0474	Distal Intergenic	14	51044332	51115198	70867	1	103910026	NM_001328701	-5076	NA	LOC103910026	PDZ and LIM domain protein 7-like
chr4	60254917	60255038	122	*	2.02	1.13	2.97	-1.84	0.0139	0.0474	Distal Intergenic	4	59748936	59757039	8104	1	569852	NM_001111199	505981	ENSDARG00000078728	znf1068	zinc finger protein 1068
chr23	17481718	17481981	264	*	2.99	3.33	1.91	1.42	0.0139	0.0474	Distal Intergenic	23	17454691	17470113	15423	2	445187	NM_001003581	-11605	ENSDARG00000018264	trim101	tripartite motif containing 101
chr22	37623952	37624340	389	*	4.17	4.43	3.42	1.01	0.0139	0.0474	Distal Intergenic	22	37631234	37716627	85394	1	554967	NM_201184	-6894	ENSDARG00000003189	psmd1	proteasome 26S subunit, non-ATPase 1
chr5	30714425	30714755	331	*	2.39	1.72	3.18	-1.47	0.0139	0.0474	Promoter (<=1kb)	5	30707130	30715229	8100	2	338307	NM_001075103	474	ENSDARG00000055647	ftr82	finTRIM family, member 82
chr18	49668114	49668406	293	*	3.47	3.76	2.62	1.14	0.0139	0.0474	Distal Intergenic	18	49411408	49428855	17448	1	100333421	NM_001365220	256706	ENSDARG00000039500	si:cabz01090165.1	si:cabz01090165.1
chr23	26353854	26354229	376	*	3.78	4.09	2.86	1.23	0.0139	0.0474	Intron (NM_001365193/561689, intron 1 of 20)	23	26230769	26489412	258644	2	561689	NM_001365193	135183	ENSDARG00000101869	magi3a	membrane associated guanylate kinase, WW and PDZ domain containing 3a
chr21	18306011	18306252	242	*	1.83	1.18	2.61	-1.43	0.0139	0.0474	Distal Intergenic	21	18276015	18290978	14964	1	406372	NM_213099	29996	ENSDARG00000016903	wdr5	WD repeat domain 5
chr18	17149254	17149373	120	*	3.03	2.26	3.89	-1.63	0.0139	0.0474	Distal Intergenic	18	17079987	17145111	65125	2	555770	NM_001044339	-4143	ENSDARG00000062506	zc3h18	zinc finger CCCH-type containing 18
chr9	18297675	18297923	249	*	2.99	3.38	1.6	1.77	0.0139	0.0474	Distal Intergenic	9	18215949	18278578	62630	1	445082	NM_001003476	81726	ENSDARG00000038309	dnajc15	DnaJ (Hsp40) homolog, subfamily C, member 15
chr17	30237637	30238018	382	*	3.39	3.7	2.45	1.25	0.0139	0.0474	Intron (NM_001142264/799739, intron 8 of 9)	17	30205258	30274318	69061	1	799739	NM_001142264	32379	ENSDARG00000054414	spata17	spermatogenesis associated 17
chr7	34680024	34680127	104	*	0.92	0.06	1.84	-1.78	0.0139	0.0474	Distal Intergenic	7	34620525	34653251	32727	1	565213	NM_001113472	59499	ENSDARG00000078560	slc9a5	solute carrier family 9 member A5
chr16	42023606	42023837	232	*	1.92	1.27	2.71	-1.44	0.0139	0.0474	Intron (NM_001008780/386723, intron 1 of 8)	16	42018042	42046881	28840	1	386723	NM_001008780	5564	ENSDARG00000040080	fli1b	Fli-1 proto-oncogene, ETS transcription factor b
chr5	64798336	64798949	614	*	3.28	2.85	3.87	-1.02	0.0139	0.0474	Distal Intergenic	5	64814195	64831192	16998	2	558010	NM_001326396	32243	ENSDARG00000052154	lix1	limb and CNS expressed 1
chr9	9592646	9592903	258	*	3.29	2.63	4.08	-1.45	0.0139	0.0474	Exon (NM_131381/30654, exon 8 of 12)	9	9579554	9671244	91691	2	30654	NM_131381	78341	ENSDARG00000017803	gsk3ba	glycogen synthase kinase 3 beta, genome duplicate a
chr14	42301525	42301688	164	*	3.17	2.61	3.88	-1.27	0.0139	0.0474	Distal Intergenic	14	42172501	42179348	6848	1	562031	NM_001115099	129024	ENSDARG00000052494	pcdh18b	protocadherin 18b
chr11	30997390	30997865	476	*	4	3.42	4.73	-1.31	0.0139	0.0474	Exon (NM_001328708/569528, exon 42 of 46)	11	30817943	31024912	206970	1	569528	NM_001328708	179447	ENSDARG00000006923	cacna1ab	calcium channel, voltage-dependent, P/Q type, alpha 1A subunit, b
chr24	40372228	40372657	430	*	4.7	5.01	3.79	1.22	0.0139	0.0474	Distal Intergenic	24	40656508	40667800	11293	2	321552	NM_001020507	295143	ENSDARG00000099959	smyhc1	slow myosin heavy chain 1
chr3	15706690	15706909	220	*	2.43	2.81	1.06	1.75	0.0139	0.0474	Downstream (1-2kb)	3	15708422	15734358	25937	2	373081	NM_201325	27449	ENSDARG00000021242	mvp	major vault protein
chr2	71648	71837	190	*	4.04	3.59	4.66	-1.06	0.0139	0.0474	Promoter (2-3kb)	2	68788	71962	3175	1	81590	NM_131770	2860	NA	cldn1	claudin 1
chr5	53917009	53917134	126	*	1.74	1.07	2.55	-1.49	0.0139	0.0474	Intron (NM_001040314/678556, intron 1 of 4)	5	53908608	53955183	46576	2	678556	NM_001040314	38049	ENSDARG00000101109	cldn15b	claudin 15b
chr2	50740409	50740880	472	*	3.18	2.63	3.89	-1.27	0.0139	0.0474	Distal Intergenic	2	50821840	50891937	70098	1	541315	NM_001013444	-80960	ENSDARG00000105201	adcyap1r1a	adenylate cyclase activating polypeptide 1a (pituitary) receptor type I
chr24	8827760	8828381	622	*	3.3	2.87	3.89	-1.02	0.0139	0.0474	3' UTR	24	8827631	8831830	4200	2	449615	NM_001005603	3449	ENSDARG00000045413	gcm2	glial cells missing transcription factor 2
chr13	11566873	11567219	347	*	3.17	3.49	2.16	1.34	0.0139	0.0474	Exon (NM_001003532/445138, exon 3 of 5)	13	11550454	11570568	20115	1	445138	NM_001003532	16419	ENSDARG00000004460	desi2	desumoylating isopeptidase 2
chr24	36668691	36668879	189	*	1.88	1.23	2.67	-1.44	0.0139	0.0474	Distal Intergenic	24	36673689	36680261	6573	2	436948	NM_001002675	11382	ENSDARG00000040643	ccr10	chemokine (C-C motif) receptor 10
chr14	31817391	31817580	190	*	2.73	1.99	3.59	-1.6	0.0139	0.0474	Distal Intergenic	14	31788733	31797968	9236	1	793819	NM_001144809	28658	ENSDARG00000079333	cd40lg	CD40 ligand
chr12	40465846	40466069	224	*	1.62	0.82	2.5	-1.68	0.0139	0.0474	Distal Intergenic	12	41582640	41618831	36192	2	553411	NM_001020516	1152762	ENSDARG00000103490	dpysl4	dihydropyrimidinase like 4
chr9	10200001	10200634	634	*	3.26	2.77	3.92	-1.14	0.0139	0.0474	Distal Intergenic	9	10138200	10145795	7596	2	445242	NM_001003636	-54206	ENSDARG00000012796	hnmt	histamine N-methyltransferase
chr23	4561873	4562073	201	*	1.62	0.89	2.46	-1.58	0.0139	0.0474	Distal Intergenic	23	4699159	4704938	5780	2	326846	NM_199749	142865	ENSDARG00000045776	cnbpa	CCHC-type zinc finger, nucleic acid binding protein a
chr15	7582940	7583096	157	*	1.32	0.5	2.22	-1.71	0.0139	0.0474	Distal Intergenic	15	7711957	8151371	439415	1	571698	NM_001113555	-128861	ENSDARG00000062633	cadm2b	cell adhesion molecule 2b
chr7	8728378	8728558	181	*	2.96	2.4	3.68	-1.29	0.0139	0.0475	Distal Intergenic	7	8694561	8712035	17475	2	554131	NM_001024426	-16343	ENSDARG00000044584	tex261	testis expressed 261
chr8	36552366	36552680	315	*	2.63	2.05	3.37	-1.32	0.0139	0.0475	Distal Intergenic	8	36560026	36570234	10209	1	796388	NM_200094	-7346	ENSDARG00000041887	sf3a1	splicing factor 3a, subunit 1
chr14	31013589	31013790	202	*	2.04	1.33	2.87	-1.54	0.0139	0.0475	Intron (NM_001112675/567027, intron 5 of 7)	14	30993185	31059218	66034	2	567027	NM_001112675	45428	ENSDARG00000016085	mbnl3	muscleblind-like splicing regulator 3
chr20	30118925	30119114	190	*	3.55	2.76	4.43	-1.67	0.0139	0.0475	Distal Intergenic	20	30032636	30035292	2657	2	30603	NM_131337	-83633	ENSDARG00000095743	sox11b	SRY-box transcription factor 11b
chr6	55102757	55103234	478	*	2.56	1.98	3.3	-1.33	0.0139	0.0475	Distal Intergenic	6	55032487	55080761	48275	1	321053	NM_001100137	70270	ENSDARG00000003081	mybphb	myosin binding protein Hb
chr8	20378451	20378740	290	*	1.61	0.86	2.48	-1.62	0.0139	0.0475	Promoter (2-3kb)	8	20298369	20380750	82382	2	564734	NM_001123274	2010	ENSDARG00000075188	adamts10	ADAM metallopeptidase with thrombospondin type 1 motif, 10
chr20	47781588	47782656	1069	*	5.09	5.4	4.12	1.28	0.0139	0.0475	Distal Intergenic	20	47718261	47732703	14443	2	566838	NM_001025546	-48885	ENSDARG00000023272	tfap2d	transcription factor AP-2 delta (activating enhancer binding protein 2 delta)
chr19	12040580	12040763	184	*	1.9	2.27	0.65	1.61	0.0139	0.0475	Exon (NM_001326695/557995, exon 6 of 10)	19	12030832	12078583	47752	2	557995	NM_001326695	37820	ENSDARG00000012040	rnf19a	ring finger protein 19A, RBR E3 ubiquitin protein ligase
chr22_KZ115641v1_alt	275142	275261	120	*	2.1	1.49	2.85	-1.36	0.0139	0.0475	Intron (NM_199953/335485, intron 1 of 5)	838	255723	297995	42273	1	335485	NM_199953	19419	ENSDARG00000028896	plpp2b	phospholipid phosphatase 2b
chr19	6362555	6362984	430	*	4.04	4.38	2.97	1.41	0.0139	0.0475	Exon (NM_131684/64610, exon 4 of 21)	19	6328250	6385541	57292	2	64610	NM_131684	22557	ENSDARG00000018259	atp1a3a	ATPase Na+/K+ transporting subunit alpha 3a
chr8	13400074	13400225	152	*	0.96	0.07	1.9	-1.83	0.0139	0.0475	Distal Intergenic	8	13364950	13382353	17404	1	561445	NM_001089391	35124	ENSDARG00000005392	slc5a5	solute carrier family 5 member 5
chr14	28362415	28363036	622	*	4.31	4.62	3.35	1.27	0.0139	0.0475	Distal Intergenic	14	28426613	28432699	6087	2	548344	NM_001017548	69663	ENSDARG00000037174	nek12	NIMA-related kinase 12
chr19	20761823	20762322	500	*	4.48	4.83	3.36	1.47	0.0139	0.0475	Exon (NM_001020601/553627, exon 10 of 11)	19	20761666	20777190	15525	2	553627	NM_001020601	14868	ENSDARG00000003205	ngly1	N-glycanase 1
chr22	33981119	33981261	143	*	1.05	0.29	1.92	-1.63	0.0139	0.0475	Distal Intergenic	22	33535560	33916072	380513	2	100331190	NM_001302247	-65047	NA	LOC100331190	metabotropic glutamate receptor 7
chr1	43205502	43205749	248	*	2.2	2.62	0.58	2.04	0.0139	0.0475	Distal Intergenic	1	43652480	43684552	32073	2	436850	NM_001002577	478803	ENSDARG00000052712	suclg1	succinate-CoA ligase, alpha subunit
chr3	4577555	4577694	140	*	0.93	0.01	1.89	-1.89	0.0139	0.0475	Promoter (1-2kb)	3	4553927	4575563	21637	2	100137114	NM_001114711	-1992	ENSDARG00000115041	ftr50	finTRIM family, member 50
chr17	27304437	27304766	330	*	1.79	1.14	2.58	-1.44	0.0138	0.047	Distal Intergenic	17	27271399	27273289	1891	2	246093	NM_152967	-31148	ENSDARG00000054823	id3	inhibitor of DNA binding 3
chr1	16355348	16355650	303	*	2.49	1.94	3.19	-1.26	0.0138	0.047	Distal Intergenic	1	16392410	16394473	2064	2	559630	NM_001037103	38823	ENSDARG00000007356	fgf20a	fibroblast growth factor 20a
chr7	7686987	7687107	121	*	1.95	1.24	2.77	-1.53	0.0138	0.047	Distal Intergenic	7	7696693	7707213	10521	1	768122	NM_001077258	-9586	ENSDARG00000062749	ino80b	INO80 complex subunit B
chr8	45694216	45694337	122	*	1.28	0.35	2.24	-1.89	0.0138	0.047	Distal Intergenic	8	45755644	45760057	4414	2	336612	NM_212758	65720	ENSDARG00000009212	ppiaa	peptidylprolyl isomerase Aa (cyclophilin A)
chr5	30051786	30052147	362	*	4.02	4.35	2.98	1.37	0.0138	0.047	Distal Intergenic	5	30081241	30088079	6839	2	436762	NM_001002489	35932	ENSDARG00000055712	sdhda	succinate dehydrogenase complex, subunit D, integral membrane protein a
chr9	30968972	30969293	322	*	2.79	3.2	1.27	1.93	0.0138	0.047	Intron (NM_001080673/791191, intron 1 of 10)	9	30890549	31062704	172156	1	791191	NM_001080673	78423	ENSDARG00000069440	dachd	dachshund d
chr24	28935570	28935723	154	*	3.03	3.35	2.02	1.33	0.0138	0.047	Promoter (<=1kb)	24	28935236	28967023	31788	1	565672	NM_001039930	334	ENSDARG00000011247	rnpc3	RNA-binding region (RNP1, RRM) containing 3
chr2	29460473	29460646	174	*	2.51	1.77	3.36	-1.6	0.0138	0.047	Distal Intergenic	2	29477384	29485105	7722	2	30331	NM_131110	24459	ENSDARG00000011166	cahz	carbonic anhydrase
chr23	677077	677445	369	*	3.41	3.78	2.17	1.61	0.0138	0.047	Distal Intergenic	23	642004	653333	11330	1	405815	NM_212879	35073	ENSDARG00000027658	irf10	interferon regulatory factor 10
chr4	12265102	12265417	316	*	2.28	1.63	3.06	-1.43	0.0138	0.047	Exon (NM_201169/394144, exon 11 of 13)	4	12243698	12286067	42370	2	394144	NM_201169	20650	ENSDARG00000007639	cnot4b	CCR4-NOT transcription complex, subunit 4b
chr23	34162516	34162734	219	*	2.11	1.55	2.83	-1.27	0.0138	0.047	Intron (NM_001005584/449542, intron 7 of 7)	23	34047450	34185019	137570	1	449542	NM_001005584	115066	ENSDARG00000003206	chchd6a	coiled-coil-helix-coiled-coil-helix domain containing 6a
chr20	28291061	28291291	231	*	2	1.29	2.82	-1.53	0.0138	0.047	Intron (NM_001045119/566768, intron 27 of 35)	20	28269603	28352352	82750	2	566768	NM_001045119	61061	ENSDARG00000070432	ino80	INO80 complex ATPase subunit
chr9	53981494	53981961	468	*	4.02	4.33	3.08	1.25	0.0138	0.047	Distal Intergenic	9	53842705	53899101	56397	2	553061	NM_001144040	-82393	ENSDARG00000101999	cog3	component of oligomeric golgi complex 3
chr15	32459837	32460002	166	*	1.18	0.39	2.06	-1.67	0.0138	0.047	Exon (NM_001137661/566673, exon 15 of 24)	15	32437281	32595982	158702	2	566673	NM_001137661	135980	ENSDARG00000102626	frem2b	FRAS1 related extracellular matrix 2b
chr24	59101	59220	120	*	2.67	1.88	3.56	-1.68	0.0138	0.047	Distal Intergenic	24	119680	150447	30768	1	792928	NM_001115059	-60460	ENSDARG00000042259	tgfbr1b	transforming growth factor, beta receptor 1 b
chr10	24813449	24813666	218	*	1.84	1.14	2.66	-1.52	0.0138	0.047	Distal Intergenic	10	24762211	24765949	3739	2	550527	NM_001017829	-47500	ENSDARG00000043898	timm10b	translocase of inner mitochondrial membrane 10 homolog B (yeast)
chr17	18117707	18117964	258	*	4.35	3.72	5.13	-1.41	0.0138	0.047	Promoter (<=1kb)	17	18117029	18180747	63719	1	100093707	NM_001328406	678	ENSDARG00000062510	bcl11ba	BAF chromatin remodeling complex subunit BCL11B a
chr6	57659470	57659591	122	*	1.97	1.1	2.9	-1.8	0.0138	0.047	Distal Intergenic	6	57634378	57655030	20653	2	767652	NM_001365483	-4440	ENSDARG00000074337	cbfa2t2	CBFA2/RUNX1 partner transcriptional co-repressor 2
chr10	17050598	17050718	121	*	1.6	0.86	2.45	-1.59	0.0138	0.047	Distal Intergenic	10	17077435	17083180	5746	2	100009651	NM_001083020	32462	ENSDARG00000100292	fam166b	family with sequence similarity 166 member B
chr11	6446128	6446263	136	*	1.02	0.2	1.92	-1.72	0.0138	0.047	3' UTR	11	6446235	6452467	6233	2	565767	NM_001089408	6204	ENSDARG00000003968	larp6b	La ribonucleoprotein 6, translational regulator b
chr16	6973359	6973478	120	*	2.16	1.29	3.09	-1.8	0.0138	0.047	Distal Intergenic	16	6944748	6955542	10795	1	415205	NM_001002115	28611	ENSDARG00000070795	eaf1	ELL associated factor 1
chr14	26008887	26009101	215	*	2.73	3.06	1.71	1.35	0.0138	0.047	Distal Intergenic	14	25982959	25985762	2804	2	558347	NM_001256633	-23125	ENSDARG00000087693	atox1	antioxidant 1 copper chaperone
chr8	45853454	45853723	270	*	2.22	1.65	2.95	-1.31	0.0138	0.047	Intron (NM_001004678/447940, intron 9 of 9)	8	45850137	45939691	89555	2	447940	NM_001004678	85968	ENSDARG00000010070	adam9	ADAM metallopeptidase domain 9
chr15	33432658	33432773	116	*	1.12	0.13	2.12	-1.99	0.0138	0.047	Distal Intergenic	15	33704751	33734092	29342	2	326652	NM_199743	301319	ENSDARG00000102636	trmt9b	tRNA methyltransferase 9B
chr20	28418522	28418800	279	*	2.7	2.14	3.41	-1.26	0.0138	0.047	Distal Intergenic	20	28401532	28404362	2831	2	436838	NM_001002565	-14160	ENSDARG00000038348	pigh	phosphatidylinositol glycan anchor biosynthesis, class H
chr7	49361217	49361338	122	*	3.63	2.77	4.55	-1.78	0.0138	0.047	Distal Intergenic	7	49638617	49651202	12586	2	553656	NM_001020629	289864	ENSDARG00000005651	hrasb	HRas proto-oncogene, GTPase b
chr4	3037190	3037480	291	*	3.73	4.11	2.37	1.74	0.0138	0.047	Intron (NM_001327786/567300, intron 3 of 25)	4	2948063	3145359	197297	2	567300	NM_001327786	107879	ENSDARG00000045870	plekha5	pleckstrin homology domain containing, family A member 5
chr6	42338147	42338643	497	*	5.14	5.37	4.54	0.84	0.0138	0.047	Promoter (<=1kb)	6	42338310	42341224	2915	1	447895	NM_001004634	0	ENSDARG00000006207	gpx1b	glutathione peroxidase 1b
chr25	29195213	29195366	154	*	2.04	2.46	0.35	2.12	0.0138	0.047	Intron (NM_001003488/445094, intron 9 of 9)	25	29161939	29196072	34134	1	445094	NM_001003488	33274	ENSDARG00000099860	pkmb	pyruvate kinase M1/2b
chr19	13807243	13807626	384	*	4.39	4.71	3.43	1.28	0.0138	0.047	Promoter (1-2kb)	19	13803153	13808632	5480	2	100124530	NM_001102573	1006	ENSDARG00000104292	ccn2b	cellular communication network factor 2b
chr19	7646306	7646497	192	*	1.97	1.27	2.8	-1.52	0.0138	0.047	Exon (NM_001044762/100005752, exon 2 of 20)	19	7636942	7680056	43115	1	100005752	NM_001044762	9364	ENSDARG00000058690	cgnb	cingulin b
chr17	32261760	32261861	102	*	1.56	0.9	2.36	-1.46	0.0138	0.047	Distal Intergenic	17	32365941	32370025	4085	2	559076	NM_001077604	108164	ENSDARG00000013794	klf11b	Kruppel-like factor 11b
chr24	18762534	18763004	471	*	3.37	3.74	2.12	1.62	0.0138	0.047	Distal Intergenic	24	18521060	18685034	163975	2	393817	NM_200844	-77500	ENSDARG00000101443	relch	RAB11 binding and LisH domain, coiled-coil and HEAT repeat containing
chr21	10347330	10347541	212	*	1.76	1.04	2.6	-1.56	0.0138	0.047	Distal Intergenic	21	10577527	10676771	99245	1	555629	NM_001163923	-229986	ENSDARG00000086158	ccbe1	collagen and calcium binding EGF domains 1
chr5	55773699	55773869	171	*	2.39	2.74	1.21	1.54	0.0138	0.047	Exon (NM_001017607/550270, exon 10 of 12)	5	55763277	55848359	85083	2	550270	NM_001017607	74490	ENSDARG00000005372	camk4	calcium/calmodulin-dependent protein kinase IV
chr19	13507424	13507664	241	*	3.35	3.68	2.33	1.35	0.0138	0.047	Distal Intergenic	19	13410943	13420491	9549	1	321872	NM_199574	96481	ENSDARG00000105293	srsf4	serine and arginine rich splicing factor 4
chr19	25800027	25800317	291	*	4.16	3.64	4.85	-1.21	0.0138	0.047	Distal Intergenic	19	25699329	25772843	73515	2	80959	NM_212563	-27184	ENSDARG00000036090	pard6gb	par-6 family cell polarity regulator gamma b
chr7	25800586	25800705	120	*	1.73	0.81	2.68	-1.87	0.0138	0.047	Distal Intergenic	7	25825607	25855958	30352	1	560881	NM_001365554	-24902	ENSDARG00000037560	mtm1	myotubularin 1
chr7	8251851	8252084	234	*	1.71	1.04	2.52	-1.48	0.0138	0.0471	Distal Intergenic	7	8270776	8315179	44404	2	561287	NM_001077154	63095	ENSDARG00000036893	f13a1b	coagulation factor XIII, A1 polypeptide b
chr7	28967547	28967733	187	*	2.5	2.87	1.26	1.61	0.0138	0.0471	Distal Intergenic	7	29012033	29017230	5198	1	386722	NM_001319131	-44300	ENSDARG00000012030	dnaaf1	dynein, axonemal, assembly factor 1
chr5	19743394	19743601	208	*	2.12	1.51	2.87	-1.36	0.0138	0.0471	Intron (NM_001126454/793922, intron 1 of 1)	5	19712011	19752895	40885	1	793922	NM_001126454	31383	ENSDARG00000090797	fam222a	family with sequence similarity 222 member A
chr20	53568674	53568873	200	*	2.9	2.25	3.69	-1.44	0.0138	0.0471	Exon (NM_001162487/567874, exon 8 of 8)	20	53541389	53568849	27461	1	567874	NM_001162487	27285	ENSDARG00000052405	pak6b	p21 protein (Cdc42/Rac)-activated kinase 6b
chr13	27682179	27682383	205	*	1.94	1.24	2.76	-1.52	0.0138	0.0471	Distal Intergenic	13	27768936	27782763	13828	1	541402	NM_001013529	-86553	ENSDARG00000021681	asrgl1	asparaginase and isoaspartyl peptidase 1
chr2	6996004	6996305	302	*	5.49	5.7	4.96	0.74	0.0138	0.0471	Distal Intergenic	2	6999369	7057330	57962	1	558034	NM_001126390	-3064	ENSDARG00000029671	xpr1b	xenotropic and polytropic retrovirus receptor 1b
chr5	26435387	26435507	121	*	1.55	0.78	2.42	-1.63	0.0138	0.0471	Intron (NM_001128534/564669, intron 1 of 15)	5	26269023	26493253	224231	2	564669	NM_001128534	57746	ENSDARG00000061688	arvcfb	ARVCF delta catenin family member b
chr12	567809	568086	278	*	2.57	1.97	3.32	-1.35	0.0138	0.0471	Distal Intergenic	12	546279	558201	11923	2	405767	NM_212841	-9608	ENSDARG00000099069	bsk146	brain specific kinase 146
chr4	4406027	4406423	397	*	4.14	4.44	3.24	1.2	0.0138	0.0471	Intron (NM_001327813/386825, intron 1 of 1)	4	4397514	4431975	34462	2	386825	NM_001327813	25552	ENSDARG00000059043	ntf3	neurotrophin 3
chr20	12288754	12290196	1443	*	4.4	3.93	5.03	-1.1	0.0138	0.0471	Distal Intergenic	20	12702956	12722349	19394	1	751751	NM_001045461	-412760	ENSDARG00000100439	zgc:153383	zgc:153383
chr17	24080697	24080896	200	*	3.03	3.38	1.91	1.47	0.0138	0.0471	3' UTR	17	24064014	24080921	16908	1	793362	NM_205752	16683	ENSDARG00000091902	b3gnt2b	UDP-GlcNAc:betaGal beta-1,3-N-acetylglucosaminyltransferase 2b
chr5	17302791	17303084	294	*	3.01	3.38	1.75	1.63	0.0138	0.0471	Distal Intergenic	5	17780475	17813299	32825	1	564271	NM_001100015	-477391	ENSDARG00000075347	chfr	checkpoint with forkhead and ring finger domains, E3 ubiquitin protein ligase
chr5	25156485	25156838	354	*	3.53	3.83	2.63	1.2	0.0138	0.0471	Distal Intergenic	5	25084410	25087189	2780	1	492631	NM_001130597	72075	ENSDARG00000078807	paxx	PAXX non-homologous end joining factor
chr21	41847898	41848160	263	*	1.96	1.37	2.71	-1.34	0.0138	0.0471	Exon (NM_001002087/415177, exon 4 of 8)	21	41839476	41862076	22601	1	415177	NM_001002087	8422	ENSDARG00000043905	rnf14	ring finger protein 14
chr16	2711899	2712043	145	*	6.17	5.95	6.52	-0.58	0.0138	0.0471	Distal Intergenic	16	2637488	2650355	12868	2	797125	NM_001109728	-61544	ENSDARG00000088764	LOC797125	uncharacterized LOC797125
chr25	24849389	24849523	135	*	4.01	3.63	4.57	-0.94	0.0138	0.0471	Distal Intergenic	25	25123385	25131749	8365	1	30496	NM_131246	-273862	ENSDARG00000101251	ldha	lactate dehydrogenase A4
chr19	37278756	37279278	523	*	3.96	4.28	3	1.27	0.0138	0.0471	Distal Intergenic	19	37153409	37154436	1028	2	557275	NM_001044823	-124320	ENSDARG00000070357	cx39.4	connexin 39.4
chr21	25250788	25251097	310	*	2.39	1.84	3.1	-1.26	0.0138	0.0471	Exon (NM_001243035/567709, exon 23 of 26)	21	25246983	25272303	25321	2	567709	NM_001243035	21206	ENSDARG00000091512	nfrkb	nuclear factor related to kappaB binding protein
chr20	15683408	15683682	275	*	2	1.29	2.82	-1.53	0.0138	0.0471	Distal Intergenic	20	15600425	15605013	4589	1	735295	NM_001042701	82983	ENSDARG00000098913	faslg	Fas ligand (TNF superfamily, member 6)
chr22	2217859	2218029	171	*	2.56	2.93	1.33	1.6	0.0138	0.0471	Intron (NM_001020813/553993, intron 2 of 5)	22	2057610	2408014	350405	1	553993	NM_001020813	160249	ENSDARG00000071741	zgc:112977	zgc:112977
chr7	31510684	31510929	246	*	2.6	1.94	3.39	-1.45	0.0138	0.0471	Distal Intergenic	7	31432142	31441426	9285	2	553329	NM_001199362	-69258	ENSDARG00000053362	cilp	cartilage intermediate layer protein, nucleotide pyrophosphohydrolase
chr3	49166009	49166180	172	*	4.07	4.36	3.23	1.14	0.0138	0.0471	Promoter (2-3kb)	3	49150822	49163648	12827	2	445177	NM_001003571	-2361	ENSDARG00000099383	dnajb1a	DnaJ heat shock protein family (Hsp40) member B1a
chr23	6637499	6637653	155	*	2.42	2.78	1.19	1.59	0.0138	0.0471	3' UTR	23	6637612	6641218	3607	2	553420	NM_001020520	3565	ENSDARG00000013963	mipb	major intrinsic protein of lens fiber b
chr11	9242796	9243158	363	*	2.03	1.38	2.82	-1.44	0.0138	0.0471	Distal Intergenic	11	8565828	8674470	108643	1	553608	NM_001020583	676968	ENSDARG00000058696	tbl1xr1a	transducin (beta)-like 1 X-linked receptor 1a
chr20	17461965	17462166	202	*	2.58	1.84	3.43	-1.59	0.0138	0.0471	Distal Intergenic	20	17740104	17819237	79134	1	30291	NM_131081	-277938	ENSDARG00000018693	cdh2	cadherin 2, type 1, N-cadherin (neuronal)
chr9	20669333	20669547	215	*	1.55	0.75	2.44	-1.69	0.0138	0.0471	Intron (NM_001256622/335538, intron 4 of 13)	9	20554178	20764180	210003	1	335538	NM_001256622	115155	ENSDARG00000041728	man1a2	mannosidase, alpha, class 1A, member 2
chr2	11509182	11509594	413	*	4.39	3.91	5.04	-1.12	0.0138	0.0471	3' UTR	2	11508692	11512818	4127	2	368228	NM_200083	3224	ENSDARG00000004869	penka	proenkephalin a
chr19	30987841	30988085	245	*	3.58	3.93	2.41	1.52	0.0138	0.0471	Distal Intergenic	19	30999839	31007318	7480	2	321726	NM_212595	19233	ENSDARG00000029058	rbbp4	retinoblastoma binding protein 4
chr2	32555532	32555952	421	*	4.6	4.9	3.74	1.16	0.0138	0.0471	Distal Intergenic	2	32561180	32574925	13746	2	406589	NM_213298	18973	ENSDARG00000038787	tmub1	transmembrane and ubiquitin-like domain containing 1
chr20	47670900	47671073	174	*	1.12	0.36	1.98	-1.63	0.0138	0.0471	Distal Intergenic	20	47688719	47705199	16481	2	550545	NM_001024665	34126	ENSDARG00000012667	tfap2b	transcription factor AP-2 beta
chr25	1150336	1150743	408	*	2.92	2.43	3.58	-1.15	0.0138	0.0471	Distal Intergenic	25	1127013	1134164	7152	1	406300	NM_213027	23323	ENSDARG00000104940	ciao2a	cytosolic iron-sulfur assembly component 2A
chr17	24937459	24937880	422	*	5.36	5.61	4.69	0.92	0.0138	0.0471	Distal Intergenic	17	24917765	24919205	1441	2	564090	NM_001128717	-18254	ENSDARG00000096843	zgc:193593	zgc:193593
chr6	58916883	58917067	185	*	4.59	4.89	3.7	1.19	0.0138	0.0471	Promoter (<=1kb)	6	58915889	58919086	3198	1	561924	NM_001082825	994	ENSDARG00000059836	ddit3	DNA-damage-inducible transcript 3
chr11	2741519	2741651	133	*	2.85	2.36	3.52	-1.16	0.0138	0.0471	Intron (NM_001313759/266756, intron 5 of 11)	11	2710527	2760373	49847	1	266756	NM_001313759	30992	ENSDARG00000028721	mapk14b	mitogen-activated protein kinase 14b
chr10	33325356	33325543	188	*	2.99	3.32	1.96	1.36	0.0138	0.0471	Distal Intergenic	10	33376818	33376941	124	2	100033790	NR_045237	51398	ENSDARG00000082262	mir454a	microRNA 454a
chr24	17931580	17931697	118	*	0.97	0.05	1.93	-1.88	0.0138	0.0471	Intron (NM_001281991/559157, intron 1 of 23)	24	17421422	18179843	758422	2	559157	NM_001281991	248146	ENSDARG00000058969	cntnap2a	contactin associated protein like 2a
chr25	37340246	37340406	161	*	3.16	3.51	2	1.51	0.0138	0.0471	Promoter (2-3kb)	25	37332640	37338048	5409	2	793099	NM_001161749	-2198	ENSDARG00000051761	trim44	tripartite motif containing 44
chr20	9759770	9759889	120	*	2.6	1.72	3.53	-1.81	0.0138	0.0471	Distal Intergenic	20	9763377	9776333	12957	1	321585	NM_001003832	-3488	ENSDARG00000037038	psmc6	proteasome 26S subunit, ATPase 6
chr25	33376064	33376246	183	*	3.11	2.53	3.84	-1.31	0.0138	0.0471	Distal Intergenic	25	33256092	33266375	10284	1	553619	NM_001020593	119972	ENSDARG00000040803	lactb	lactamase, beta
chr7	23944327	23944461	135	*	2.43	1.8	3.2	-1.39	0.0138	0.0471	Distal Intergenic	7	23907746	23916117	8372	1	335357	NM_199948	36581	ENSDARG00000036505	syt4	synaptotagmin IV
chr10	44508971	44509092	122	*	2.44	1.62	3.33	-1.71	0.0138	0.0471	Distal Intergenic	10	44465152	44467386	2235	2	436650	NM_001002377	-41585	ENSDARG00000111759	ccdc62	coiled-coil domain containing 62
chr13	2257542	2257723	182	*	2.93	2.23	3.76	-1.52	0.0138	0.0471	Exon (NM_001013445/541316, exon 12 of 13)	13	2254236	2308351	54116	2	541316	NM_001013445	50628	ENSDARG00000102684	lrrc1	leucine rich repeat containing 1
chr11	9983256	9983459	204	*	2.31	2.68	1.07	1.61	0.0138	0.0471	Distal Intergenic	11	9564154	9948487	384334	2	100002610	NM_001142265	-34769	ENSDARG00000077710	nlgn1	neuroligin 1
chr10	12874432	12874898	467	*	3.93	4.32	2.5	1.82	0.0138	0.0471	Distal Intergenic	10	13000704	13064111	63408	1	368461	NM_001004502	-125806	ENSDARG00000099840	lpar1	lysophosphatidic acid receptor 1
chr12	34703119	34703418	300	*	3.97	4.28	3.08	1.2	0.0138	0.0472	Distal Intergenic	12	34825064	34827477	2414	2	386981	NM_001303010	124059	ENSDARG00000096749	si:dkey-21c1.6	si:dkey-21c1.6
chr22	729829	730087	259	*	2.96	3.3	1.89	1.41	0.0138	0.0472	Exon (NM_001089477/100037321, exon 5 of 7)	22	724782	733339	8558	1	100037321	NM_001089477	5047	ENSDARG00000078301	zgc:162255	zgc:162255
chr12	37454869	37455021	153	*	2.68	2.14	3.38	-1.24	0.0138	0.0472	Distal Intergenic	12	37275333	37299671	24339	2	678607	NM_001040355	-155198	ENSDARG00000060457	pmp22b	peripheral myelin protein 22b
chr23_KZ115696v1_alt	119061	119180	120	*	1.59	0.69	2.53	-1.85	0.0138	0.0472	Distal Intergenic	898	85541	89098	3558	1	553809	NM_001020771	33520	ENSDARG00000036903	irak1bp1	interleukin-1 receptor-associated kinase 1 binding protein 1
chr14	2880253	2880434	182	*	1.69	2.12	0	2.11	0.0138	0.0472	Distal Intergenic	14	2941796	2979878	38083	2	402785	NM_203420	99444	ENSDARG00000076557	bicc2	bicaudal C homolog 2
chr5	1486029	1486352	324	*	3.1	3.43	2.03	1.41	0.0138	0.0472	Promoter (<=1kb)	5	1432468	1487226	54759	2	565431	NM_001127334	874	ENSDARG00000063197	golga2	golgin A2
chr14	4497863	4498347	485	*	3.47	3.78	2.5	1.28	0.0138	0.0472	Distal Intergenic	14	4610426	4682114	71689	2	550520	NM_001017822	183767	ENSDARG00000013389	gabra4	gamma-aminobutyric acid (GABA) A receptor, subunit alpha 4
chr12	48455623	48455928	306	*	3.48	3.81	2.42	1.39	0.0138	0.0472	Distal Intergenic	12	48469755	48477013	7259	2	393829	NM_200855	21085	ENSDARG00000010113	ndufb8	NADH:ubiquinone oxidoreductase subunit B8
chr15	16532413	16532719	307	*	2.13	1.55	2.86	-1.31	0.0138	0.0472	Distal Intergenic	15	16387134	16407983	20850	1	393612	NM_200639	145279	ENSDARG00000069774	flot2b	flotillin 2b
chr19	9524508	9524760	253	*	5.66	5.92	4.93	0.99	0.0138	0.0472	Promoter (1-2kb)	19	9512982	9522548	9567	2	322113	NM_001020468	-1960	ENSDARG00000030716	ing4	inhibitor of growth family, member 4
chr2	22694000	22694460	461	*	4.46	4.8	3.39	1.41	0.0138	0.0472	Distal Intergenic	2	22677015	22688625	11611	2	79378	NM_213162	-5375	ENSDARG00000018478	agxtb	alanine--glyoxylate and serine--pyruvate aminotransferase b
chr16	11118259	11118438	180	*	3.02	3.32	2.12	1.2	0.0138	0.0472	Distal Intergenic	16	11242421	11292151	49731	1	30664	NM_131390	-123983	ENSDARG00000015681	gsk3ab	glycogen synthase kinase 3 alpha b
chr17	45378375	45378573	199	*	3.34	3.69	2.2	1.49	0.0138	0.0472	Downstream (<1kb)	17	45378909	45386823	7915	2	393429	NM_001291762	8250	ENSDARG00000012271	pacc1	proton activated chloride channel 1
chr18	18410304	18410440	137	*	2.81	2.3	3.49	-1.18	0.0138	0.0472	Exon (NM_199787/327327, exon 2 of 7)	18	18406033	18422543	16511	1	327327	NM_199787	4271	ENSDARG00000057491	n4bp1	nedd4 binding protein 1
chr22	37552500	37552980	481	*	4.41	3.94	5.05	-1.11	0.0138	0.0472	Exon (NM_201301/327220, exon 11 of 16)	22	37542728	37565393	22666	2	327220	NM_201301	12413	ENSDARG00000022968	fxr1	fragile X mental retardation, autosomal homolog 1
chr16	35801407	35801658	252	*	1.24	0.35	2.18	-1.83	0.0138	0.0472	Distal Intergenic	16	35905031	35938155	33125	1	641492	NM_001037432	-103373	ENSDARG00000099448	sh3d21	SH3 domain containing 21
chr9	33300319	33300438	120	*	1.98	1.21	2.86	-1.65	0.0138	0.0472	Intron (NM_001077449/568683, intron 30 of 44)	9	33267211	33319395	52185	1	568683	NM_001077449	33108	ENSDARG00000013708	usp9	ubiquitin specific peptidase 9
chr12	32904884	32905564	681	*	4.53	4.85	3.52	1.32	0.0138	0.0472	Distal Intergenic	12	33297572	33314894	17323	2	550573	NM_001017875	409330	ENSDARG00000088878	c1qtnf1	C1q and TNF related 1
chr6_KZ114885v1_alt	59412	59537	126	*	2.12	1.43	2.94	-1.52	0.0138	0.0472	Distal Intergenic	246	20496	26826	6331	2	558970	NM_001079976	-32586	ENSDARG00000070013	dmrt2b	doublesex and mab-3 related transcription factor 2b
chr19	27610039	27610396	358	*	3.61	2.87	4.46	-1.59	0.0138	0.0472	Exon (NM_001099987/557902, exon 24 of 25)	19	27609926	27776649	166724	2	557902	NM_001099987	166253	ENSDARG00000014588	adcy2b	adenylate cyclase 2b (brain)
chr13	5217463	5217711	249	*	3.24	3.61	1.96	1.65	0.0138	0.0472	Distal Intergenic	13	5031197	5064494	33298	2	569858	NM_001039639	-152969	ENSDARG00000058574	abcg2c	ATP-binding cassette, sub-family G (WHITE), member 2c
chr13	24179226	24179484	259	*	3.13	3.46	2.08	1.38	0.0138	0.0472	Intron (NM_001128351/570248, intron 1 of 15)	13	24068577	24218795	150219	2	570248	NM_001128351	39311	ENSDARG00000003829	galnt2	UDP-N-acetyl-alpha-D-galactosamine:polypeptide N-acetylgalactosaminyltransferase 2
chr18	19638327	19638708	382	*	3.45	3.76	2.54	1.22	0.0138	0.0472	Distal Intergenic	18	19648221	19699449	51229	1	564395	NM_001045051	-9513	ENSDARG00000031763	smad6b	SMAD family member 6b
chr8	30555448	30555644	197	*	2.03	2.44	0.48	1.96	0.0138	0.0472	Intron (NM_001123253/560226, intron 4 of 22)	8	30501170	30593521	92352	1	560226	NM_001123253	54278	ENSDARG00000042329	si:dkey-91m11.5	si:dkey-91m11.5
chr6	2503388	2503507	120	*	1.28	0.54	2.13	-1.59	0.0138	0.0472	Distal Intergenic	6	2422585	2454122	31538	2	404615	NM_207083	-49266	ENSDARG00000114425	med8	mediator complex subunit 8
chr7	26566122	26566283	162	*	1.99	1.39	2.74	-1.35	0.0138	0.0472	Distal Intergenic	7	26545957	26564784	18828	1	565029	NM_001080017	20165	ENSDARG00000069433	tnk1	tyrosine kinase, non-receptor, 1
chr4	40661449	40661664	216	*	2.93	3.41	0.77	2.64	0.0138	0.0472	Distal Intergenic	4	41216522	41223686	7165	1	337110	NR_125778	-554858	ENSDARG00000096484	si:ch211-181p13.2	si:ch211-181p13.2
chr23	27951166	27951491	326	*	3.44	2.84	4.19	-1.34	0.0138	0.0472	Distal Intergenic	23	28023089	28025851	2763	2	324261	NM_194371	74360	ENSDARG00000115868	sp5l	Sp5 transcription factor-like
chr18	43618481	43619058	578	*	3.76	4.02	3.02	1.01	0.0138	0.0472	Distal Intergenic	18	43896153	43993634	97482	2	449532	NM_001005575	374576	ENSDARG00000055054	bcl9l	bcl9 like
chr9	30396605	30397091	487	*	3.81	3.05	4.68	-1.64	0.0138	0.0472	Distal Intergenic	9	30387930	30392500	4571	1	794946	NM_001122707	8675	ENSDARG00000079703	si:dkey-18p12.4	si:dkey-18p12.4
chr3	18886617	18886846	230	*	1.85	1.19	2.65	-1.46	0.0137	0.0467	Distal Intergenic	3	18936005	18967662	31658	1	100535597	NM_001328094	-49159	ENSDARG00000093192	si:ch211-198m1.1	si:ch211-198m1.1
chr14	8101520	8101687	168	*	2.56	2.92	1.34	1.58	0.0137	0.0467	Distal Intergenic	14	8043441	8080416	36976	2	436899	NM_001002626	-21104	ENSDARG00000029443	zgc:92242	zgc:92242
chr21	31679325	31679702	378	*	1.95	1.21	2.8	-1.59	0.0137	0.0467	Distal Intergenic	21	32021266	32036597	15332	2	100073329	NM_001098766	356895	ENSDARG00000102482	zgc:165573	zgc:165573
chr9	6797481	6797785	305	*	2.65	3.06	1.14	1.92	0.0137	0.0467	Distal Intergenic	9	6915611	6927545	11935	2	503742	NM_001013320	129760	ENSDARG00000040374	tmem182a	transmembrane protein 182a
chr19	2189989	2190480	492	*	3.76	4.05	2.86	1.19	0.0137	0.0467	Intron (NM_198819/386705, intron 29 of 29)	19	1743043	2214712	471670	1	386705	NM_198819	446946	NA	ptk2aa	protein tyrosine kinase 2aa
chr15	33843469	33843687	219	*	3.77	4.06	2.93	1.12	0.0137	0.0467	Promoter (<=1kb)	15	33843596	33865029	21434	1	100037338	NM_001089493	0	ENSDARG00000099563	inpp5ka	inositol polyphosphate-5-phosphatase Ka
chr21	37196770	37197034	265	*	2.7	3.07	1.45	1.61	0.0137	0.0467	Promoter (2-3kb)	21	37183912	37194363	10452	2	100000160	NM_131430	-2407	ENSDARG00000069105	fgfr4	fibroblast growth factor receptor 4
chr17	36406205	36406584	380	*	2.64	1.99	3.43	-1.43	0.0137	0.0467	Distal Intergenic	17	36516703	36529016	12314	2	492459	NM_001007331	122432	ENSDARG00000013266	colec11	collectin sub-family member 11
chr24	36094897	36095494	598	*	5.18	5.41	4.56	0.85	0.0137	0.0467	Distal Intergenic	24	36129214	36136401	7188	2	447871	NM_001004610	40907	ENSDARG00000114991	tmem14cb	transmembrane protein 14Cb
chr2	22457954	22458090	137	*	1.74	2.16	0.12	2.05	0.0137	0.0467	Distal Intergenic	2	22480115	22492289	12175	2	324823	NM_199697	34199	ENSDARG00000103578	gtf2b	general transcription factor IIB
chr2	472221	472753	533	*	4.3	4.59	3.44	1.16	0.0137	0.0467	Distal Intergenic	2	374365	389813	15449	2	405856	NM_212920	-82408	ENSDARG00000005218	wrnip1	WRN helicase interacting protein 1
chr16	45823443	45823562	120	*	1.98	1.05	2.94	-1.89	0.0137	0.0467	Intron (NM_001301356/30546, intron 7 of 16)	16	45796602	45854882	58281	2	30546	NM_001301356	31320	ENSDARG00000004586	ntrk1	neurotrophic tyrosine kinase, receptor, type 1
chr23	132268	132554	287	*	3.49	3.02	4.13	-1.12	0.0137	0.0467	Distal Intergenic	23	2669	9338	6670	1	30176	NM_130985	129599	ENSDARG00000019646	twist3	twist3
chr3	57507518	57507661	144	*	1.89	1.21	2.7	-1.49	0.0137	0.0467	Intron (NM_214682/321938, intron 1 of 12)	3	57462223	57530323	68101	2	321938	NM_214682	22662	ENSDARG00000076742	cyth1a	cytohesin 1a
chr20	29510916	29511294	379	*	4.14	4.43	3.28	1.15	0.0137	0.0467	Downstream (2-3kb)	20	29502136	29505863	3728	2	560787	NM_001044941	-5053	ENSDARG00000030844	klf11a	Kruppel-like factor 11a
chr19	5341911	5342325	415	*	4.2	3.58	4.97	-1.39	0.0137	0.0467	Exon (NM_001114342/553371, exon 6 of 8)	19	5339364	5345930	6567	2	553371	NM_001114342	3605	ENSDARG00000090268	krtt1c19e	keratin type 1 c19e
chr18	43181730	43181938	209	*	1.53	0.8	2.37	-1.57	0.0137	0.0468	Intron (NM_001167569/557665, intron 6 of 7)	18	42924591	43226503	301913	1	557665	NM_001167569	257139	NA	nectin1b	nectin cell adhesion molecule 1b
chr7	53527585	53527753	169	*	2.13	1.52	2.89	-1.37	0.0137	0.0468	Exon (NM_001030081/555219, exon 5 of 9)	7	53413800	53534790	120991	1	555219	NM_001030081	113785	ENSDARG00000104530	znf609b	zinc finger protein 609b
chr11	2815640	2816179	540	*	3.27	2.68	4.01	-1.34	0.0137	0.0468	Exon (NM_001080669/791187, exon 11 of 16)	11	2763168	2826562	63395	1	791187	NM_001080669	52472	ENSDARG00000031560	srpk1b	SRSF protein kinase 1b
chr23	33917114	33917365	252	*	3.47	3.76	2.64	1.12	0.0137	0.0468	Exon (NM_199598/322339, exon 5 of 11)	23	33907899	33928314	20416	1	322339	NM_199598	9215	ENSDARG00000103364	cs	citrate synthase
chr13	31947999	31948296	298	*	2.28	1.56	3.12	-1.56	0.0137	0.0468	Distal Intergenic	13	31925506	31938489	12984	2	286787	NM_173273	-9510	ENSDARG00000017696	utp25	UTP25 small subunit processor component
chr16	49660787	49660937	151	*	2.08	1.46	2.85	-1.39	0.0137	0.0468	3' UTR	16	49647436	49661394	13959	1	393945	NM_200970	13351	ENSDARG00000007257	rab5ab	RAB5A, member RAS oncogene family, b
chr8	32349246	32349369	124	*	1.21	0.34	2.14	-1.8	0.0137	0.0468	Intron (NM_001002302/432373, intron 1 of 16)	8	32216233	32354625	138393	2	432373	NM_001002302	5256	ENSDARG00000054224	ipo11	importin 11
chr7	54076536	54076785	250	*	4.41	3.71	5.24	-1.53	0.0137	0.0468	Exon (NM_001328497/266983, exon 23 of 29)	7	53754653	54089323	334671	1	266983	NM_001328497	321883	ENSDARG00000102855	neo1a	neogenin 1a
chr12	20696209	20696328	120	*	2.23	1.41	3.14	-1.73	0.0137	0.0468	Intron (NM_001082934/799868, intron 4 of 8)	12	20691310	20699180	7871	1	799868	NM_001082934	4899	ENSDARG00000043816	st6galnac1.2	ST6 (alpha-N-acetyl-neuraminyl-2,3-beta-galactosyl-1,3)-N-acetylgalactosaminide alpha-2,6-sialyltransferase 1, tandem duplicate 2
chr11	30494619	30494851	233	*	2.17	1.39	3.04	-1.64	0.0137	0.0468	Distal Intergenic	11	30513790	30531095	17306	1	767702	NM_001076640	-18939	ENSDARG00000020758	tmem178	transmembrane protein 178
chr1	12078434	12078553	120	*	2.25	1.4	3.16	-1.75	0.0137	0.0468	Intron (NM_200471/393443, intron 7 of 8)	1	12068800	12097807	29008	1	393443	NM_200471	9634	ENSDARG00000038114	xpa	xeroderma pigmentosum, complementation group A
chr4	26150114	26150254	141	*	4.4	3.86	5.1	-1.24	0.0137	0.0468	Distal Intergenic	4	26096381	26108053	11673	2	541512	NM_001014325	-42061	ENSDARG00000045530	si:ch211-244b2.4	si:ch211-244b2.4
chr16	13582742	13582851	110	*	0.97	1.39	-0.66	2.05	0.0137	0.0468	Distal Intergenic	16	13603180	13612650	9471	2	569109	NM_001197062	29799	ENSDARG00000057652	dbpb	D site albumin promoter binding protein b
chr6	57697459	57697673	215	*	4.47	4.77	3.57	1.2	0.0137	0.0468	Distal Intergenic	6	57634378	57655030	20653	2	767652	NM_001365483	-42429	ENSDARG00000074337	cbfa2t2	CBFA2/RUNX1 partner transcriptional co-repressor 2
chr20	44054684	44054964	281	*	4.06	3.36	4.88	-1.52	0.0137	0.0468	Exon (NM_212862/405788, exon 2 of 7)	20	43996033	44090658	94626	2	405788	NM_212862	35694	ENSDARG00000059233	runx2b	RUNX family transcription factor 2b
chr5	67708778	67709172	395	*	3.63	4.01	2.27	1.74	0.0137	0.0468	Distal Intergenic	5	67533189	67660645	127457	2	568779	NM_001080604	-48133	ENSDARG00000005586	zbtb20	zinc finger and BTB domain containing 20
chr13	41098788	41098963	176	*	3.02	3.36	1.92	1.44	0.0137	0.0468	Distal Intergenic	13	41022502	41026398	3897	1	799377	NM_001281800	76286	ENSDARG00000014103	dkk1a	dickkopf WNT signaling pathway inhibitor 1a
chr21	11901875	11902205	331	*	3.37	3.72	2.19	1.53	0.0137	0.0468	Exon (NM_001077580/570671, exon 5 of 9)	21	11885543	11911966	26424	1	570671	NM_001077580	16332	ENSDARG00000063155	dcaf12	DDB1 and CUL4 associated factor 12
chr22	30563404	30563549	146	*	1.25	0.4	2.17	-1.77	0.0137	0.0468	Distal Intergenic	22	30446987	30457736	10750	1	796658	NM_001126460	116417	ENSDARG00000077862	si:dkey-169i5.4	si:dkey-169i5.4
chr4	52138443	52138701	259	*	2.44	1.82	3.21	-1.39	0.0137	0.0468	Distal Intergenic	4	52356485	52366809	10325	1	103908622	NM_001327991	-217784	ENSDARG00000105137	zgc:173705	zgc:173705
chr3	15959200	15959471	272	*	2.21	1.53	3.02	-1.49	0.0137	0.0468	Exon (NM_001302244/100318355, exon 18 of 35)	3	15907430	15988288	80859	1	100318355	NM_001302244	51770	ENSDARG00000062531	mapk8ip3	mitogen-activated protein kinase 8 interacting protein 3
chr8	52478739	52479115	377	*	2.95	2.45	3.61	-1.16	0.0137	0.0468	Promoter (<=1kb)	8	52479026	52490478	11453	1	553228	NM_001256222	0	ENSDARG00000102758	LOC553228	gamma-glutamyl hydrolase
chr15	11191368	11191577	210	*	1.97	1.26	2.79	-1.54	0.0137	0.0468	Distal Intergenic	15	11218246	11303691	85446	2	436967	NM_001002694	112114	ENSDARG00000037883	prcp	prolylcarboxypeptidase (angiotensinase C)
chr10	41352070	41352827	758	*	6.38	6.59	5.85	0.74	0.0137	0.0468	Distal Intergenic	10	41362390	41399988	37599	2	678522	NM_001040249	47161	ENSDARG00000019897	gpat4	glycerol-3-phosphate acyltransferase 4
chr10	43234823	43235296	474	*	3.76	4.09	2.7	1.38	0.0137	0.0468	Intron (NM_214688/323465, intron 10 of 14)	10	43188678	43262960	74283	1	323465	NM_214688	46145	ENSDARG00000009401	vcanb	versican b
chr13	45209719	45210460	742	*	4.5	4.82	3.51	1.31	0.0137	0.0468	Distal Intergenic	13	45092766	45200543	107778	2	58127	NM_001362344	-9176	ENSDARG00000052826	runx3	RUNX family transcription factor 3
chr23	7508663	7509091	429	*	4.19	3.61	4.92	-1.31	0.0137	0.0468	Distal Intergenic	23	7548908	7578890	29983	1	393482	NM_200510	-39817	ENSDARG00000002536	tm9sf4	transmembrane 9 superfamily protein member 4
chr12	35952358	35952610	253	*	1.57	0.83	2.42	-1.59	0.0137	0.0468	Distal Intergenic	12	35937098	35944528	7431	2	563648	NM_001110465	-7830	ENSDARG00000100285	dnai2a	dynein, axonemal, intermediate chain 2a
chr15	18900067	18900205	139	*	1.58	0.92	2.37	-1.45	0.0137	0.0468	Exon (NM_001113552/562183, exon 6 of 10)	15	18646158	18987365	341208	1	562183	NM_001113552	253909	ENSDARG00000042677	cadm1b	cell adhesion molecule 1b
chr6	59430539	59430815	277	*	3.83	3.31	4.51	-1.2	0.0137	0.0468	Exon (NM_178296/352930, exon 13 of 13)	6	59426150	59505589	79440	2	352930	NM_178296	74774	ENSDARG00000101244	gli1	GLI family zinc finger 1
chr7	1132849	1133120	272	*	2.53	2.91	1.17	1.74	0.0137	0.0468	Distal Intergenic	7	1062972	1108935	45964	2	407638	NM_001077212	-23914	ENSDARG00000019743	dctn1a	dynactin 1a
chr1	44116055	44116328	274	*	1.51	0.78	2.34	-1.56	0.0137	0.0468	Distal Intergenic	1	44127292	44141442	14151	1	572226	NM_001030268	-10964	ENSDARG00000052016	cabp2a	calcium binding protein 2a
chr7	804184	804717	534	*	5.32	5.52	4.82	0.7	0.0137	0.0468	Promoter (<=1kb)	7	778297	804515	26219	2	415099	NM_001001839	0	ENSDARG00000098696	rela	v-rel avian reticuloendotheliosis viral oncogene homolog A
chr12	1835674	1835926	253	*	2.34	1.69	3.13	-1.45	0.0137	0.0469	Distal Intergenic	12	1947593	1951233	3641	2	60641	NM_131643	115307	ENSDARG00000003293	sox9a	SRY-box transcription factor 9a
chr2	57706622	57706818	197	*	1.62	0.94	2.43	-1.49	0.0137	0.0469	Distal Intergenic	2	57825431	57837848	12418	2	394018	NM_201043	131030	ENSDARG00000021107	sf3a2	splicing factor 3a, subunit 2
chr20	48567652	48568107	456	*	3.35	3.71	2.15	1.56	0.0137	0.0469	Distal Intergenic	20	48588695	48604199	15505	2	406736	NM_213427	36092	ENSDARG00000102744	mgst3a	microsomal glutathione S-transferase 3a
chr6	53287928	53288260	333	*	2.89	2.31	3.63	-1.32	0.0137	0.0469	Distal Intergenic	6	53263602	53282604	19003	2	324302	NM_001100138	-5324	ENSDARG00000098280	rbm5	RNA binding motif protein 5
chr19	1828640	1828793	154	*	1.16	0.33	2.08	-1.75	0.0137	0.0469	Intron (NM_198819/386705, intron 20 of 29)	19	1743043	2214712	471670	1	386705	NM_198819	85597	NA	ptk2aa	protein tyrosine kinase 2aa
chr18	29916726	29916845	120	*	2.07	1.25	2.98	-1.73	0.0137	0.0469	Distal Intergenic	18	29922939	29925717	2779	2	767810	NM_001076777	8872	ENSDARG00000056330	mhc2dbb	major histocompatibility complex class II DBB gene
chr23	6160874	6161032	159	*	4.02	3.62	4.59	-0.97	0.0137	0.0469	Distal Intergenic	23	6077503	6126003	48501	1	393530	NM_200558	83371	ENSDARG00000058799	mybpha	myosin binding protein Ha
chr4	68199434	68199561	128	*	1.6	0.91	2.42	-1.51	0.0137	0.0469	Intron (NM_001320203/100141335, intron 7 of 9)	4	67939836	69621459	1681624	2	100141335	NM_001320203	1421898	ENSDARG00000116992	znf1051	zinc finger protein 1051
chr14	44771431	44771647	217	*	3.8	2.98	4.7	-1.72	0.0137	0.0469	Promoter (2-3kb)	14	44770845	44773853	3009	2	559137	NM_001044886	2206	ENSDARG00000102753	si:dkey-109l4.3	si:dkey-109l4.3
chr23	26885507	26885633	127	*	2.39	1.81	3.12	-1.31	0.0137	0.0469	Distal Intergenic	23	26979171	27006062	26892	1	553414	NM_001044396	-93538	ENSDARG00000004218	rnd1b	Rho family GTPase 1b
chr19	159094	159214	121	*	3.25	2.72	3.93	-1.21	0.0137	0.0469	Distal Intergenic	19	167096	169964	2869	1	100151626	NM_001002213	-7882	ENSDARG00000036924	tatdn1	TatD DNase domain containing 1
chr23	9206162	9206430	269	*	3.91	4.2	3.06	1.14	0.0137	0.0469	Distal Intergenic	23	9220460	9228577	8118	1	394166	NM_201191	-14030	ENSDARG00000025850	rps21	ribosomal protein S21
chr18	36782458	36782636	179	*	3.11	3.42	2.16	1.27	0.0137	0.0469	Promoter (<=1kb)	18	36782930	36800030	17101	1	692267	NM_001045241	-294	ENSDARG00000020611	si:ch211-160d20.3	si:ch211-160d20.3
chr10	12979942	12980229	288	*	1.74	1.04	2.57	-1.53	0.0137	0.0469	Distal Intergenic	10	13000704	13064111	63408	1	368461	NM_001004502	-20475	ENSDARG00000099840	lpar1	lysophosphatidic acid receptor 1
chr22	4701169	4701272	104	*	0.69	-0.32	1.69	-2.02	0.0137	0.0469	Distal Intergenic	22	4707663	4733106	25444	1	259250	NM_153670	-6391	ENSDARG00000031387	cers4a	ceramide synthase 4a
chr3	28125508	28125759	252	*	1.76	0.99	2.63	-1.64	0.0137	0.0469	Distal Intergenic	3	27986125	28075695	89571	2	449554	NM_001005596	-49813	ENSDARG00000014746	rbfox1	RNA binding fox-1 homolog 1
chr19	35223684	35223890	207	*	2.88	3.2	1.88	1.32	0.0137	0.0469	Distal Intergenic	19	35357201	35361544	4344	2	553660	NM_001020633	137654	ENSDARG00000006290	ndufs5	NADH:ubiquinone oxidoreductase subunit S5
chr6	52758503	52758635	133	*	1.75	2.16	0.17	1.99	0.0137	0.0469	Distal Intergenic	6	52790049	52846141	56093	1	497348	NM_213549	-31414	ENSDARG00000015947	matn4	matrilin 4
chr23	37471851	37472031	181	*	1.71	2.09	0.35	1.75	0.0137	0.0469	Exon (NM_001008628/494085, exon 5 of 8)	23	37466855	37478736	11882	1	494085	NM_001008628	4996	ENSDARG00000001929	pink1	PTEN induced kinase 1
chr22	3202216	3202382	167	*	2.82	2.13	3.64	-1.51	0.0137	0.0469	Exon (NM_001305468/321247, exon 13 of 19)	22	3184500	3211978	27479	1	321247	NM_001305468	17716	ENSDARG00000104938	ftsj3	FtsJ RNA 2'-O-methyltransferase 3
chr2	21020967	21021235	269	*	2.54	1.95	3.29	-1.35	0.0137	0.0469	Distal Intergenic	2	20992259	20994126	1868	2	449839	NM_001006007	-26841	ENSDARG00000042656	nrn1b	neuritin 1b
chr9	23808782	23809186	405	*	4.41	4.68	3.66	1.01	0.0137	0.0469	Promoter (<=1kb)	9	23808610	23812633	4024	1	556393	NM_001076557	172	ENSDARG00000011770	dhrs12	dehydrogenase/reductase (SDR family) member 12
chr14	7076954	7077352	399	*	2.48	1.9	3.21	-1.31	0.0137	0.0469	Distal Intergenic	14	7048993	7051938	2946	1	797938	NM_001111226	27961	ENSDARG00000075121	hbegfa	heparin-binding EGF-like growth factor a
chr24	37351416	37351806	391	*	4.47	4.82	3.3	1.52	0.0137	0.0469	Distal Intergenic	24	37338430	37347854	9425	1	415147	NM_001002057	12986	ENSDARG00000038566	gnptg	N-acetylglucosamine-1-phosphate transferase subunit gamma
chr7	72796709	72796915	207	*	1.47	0.69	2.35	-1.66	0.0137	0.0469	Distal Intergenic	7	72577898	72585111	7214	1	768305	NM_001077468	218811	ENSDARG00000003846	mrpl21	mitochondrial ribosomal protein L21
chr9	43780812	43781018	207	*	1.19	0.41	2.06	-1.65	0.0137	0.0469	Distal Intergenic	9	43797902	43880341	82440	1	321689	NM_200921	-16884	ENSDARG00000012244	ube2e3	ubiquitin-conjugating enzyme E2E 3 (UBC4/5 homolog, yeast)
chr11	42375200	42375767	568	*	3.26	2.61	4.04	-1.43	0.0137	0.0469	Intron (NM_001077254/572011, intron 3 of 22)	11	42307565	42417686	110122	2	572011	NM_001077254	41919	ENSDARG00000054458	slmapa	sarcolemma associated protein a
chr6	10129807	10130052	246	*	3.25	2.68	3.98	-1.3	0.0137	0.0469	Distal Intergenic	6	10037273	10056640	19368	1	406299	NM_213026	92534	ENSDARG00000005359	sucla2	succinate-CoA ligase, ADP-forming, beta subunit
chr17	30876246	30876398	153	*	1.91	1.19	2.75	-1.56	0.0137	0.0469	Distal Intergenic	17	30857011	30863252	6242	2	322397	NM_212617	-12994	ENSDARG00000042796	yy1a	YY1 transcription factor a
chr1	59183086	59183239	154	*	1.18	0.37	2.08	-1.71	0.0137	0.0469	Distal Intergenic	1	59192197	59216197	24001	2	567956	NM_001320133	32958	ENSDARG00000042561	lpar2b	lysophosphatidic acid receptor 2b
chr15	24058151	24058407	257	*	3.07	2.51	3.78	-1.28	0.0137	0.0469	Distal Intergenic	15	23922269	23942826	20558	2	322995	NM_212633	-115325	ENSDARG00000007566	appbp2	amyloid beta precursor protein (cytoplasmic tail) binding protein 2
chr16	29485044	29485264	221	*	2.33	2.7	1.06	1.64	0.0137	0.0469	Distal Intergenic	16	29492994	29502549	9556	1	550475	NM_001017778	-7730	ENSDARG00000040251	ctsk	cathepsin K
chr18	13753810	13753934	125	*	3.13	2.66	3.77	-1.1	0.0137	0.0469	Distal Intergenic	18	13248956	13293642	44687	1	561747	NM_001044968	504854	ENSDARG00000068763	plcg2	phospholipase C, gamma 2
chr3	57765360	57765491	132	*	2.27	2.63	1.06	1.57	0.0137	0.0469	Promoter (<=1kb)	3	57747716	57765169	17454	2	406558	NM_214743	-191	ENSDARG00000012192	cant1a	calcium activated nucleotidase 1a
chr5	68112207	68112490	284	*	2.62	2.06	3.33	-1.26	0.0137	0.0469	Distal Intergenic	5	68076913	68093169	16257	2	415189	NM_001002099	-19038	ENSDARG00000035741	slc25a11	solute carrier family 25 member 11
chr21	12347042	12347407	366	*	2.27	1.72	2.98	-1.25	0.0137	0.0469	Distal Intergenic	21	12079895	12272543	192649	2	436835	NM_001002562	-74499	ENSDARG00000070045	celf4	CUGBP, Elav-like family member 4
chr10	11909666	11909843	178	*	2.06	1.36	2.89	-1.53	0.0137	0.047	Distal Intergenic	10	11790303	11840353	50051	2	767706	NM_001076644	-69313	ENSDARG00000069420	trim23	tripartite motif containing 23
chr12	47894573	47894882	310	*	2.17	1.59	2.91	-1.32	0.0137	0.047	Distal Intergenic	12	47795030	47862432	67403	1	572258	NM_001276496	99543	ENSDARG00000102569	polr3a	polymerase (RNA) III (DNA directed) polypeptide A
chr8	42734132	42734291	160	*	2.12	2.52	0.64	1.88	0.0137	0.047	Distal Intergenic	8	42717005	42724810	7806	1	565039	NR_137284	17127	ENSDARG00000091860	zgc:194007	zgc:194007
chr10	45331792	45331913	122	*	2.05	1.34	2.88	-1.55	0.0137	0.047	Distal Intergenic	10	45345574	45352279	6706	1	335519	NM_001328424	-13661	ENSDARG00000103994	ppiab	peptidylprolyl isomerase Ab (cyclophilin A)
chr1	49403784	49404095	312	*	3.63	3.03	4.37	-1.34	0.0137	0.047	Intron (NM_001145688/557882, intron 1 of 10)	1	49370549	49409549	39001	2	557882	NM_001145688	5454	ENSDARG00000052468	gsk3bb	glycogen synthase kinase 3 beta, genome duplicate b
chr17	31084932	31085141	210	*	4.88	4.57	5.35	-0.78	0.0137	0.047	Distal Intergenic	17	30979022	31058972	79951	2	767643	NM_001193598	-25960	ENSDARG00000042840	eml1	EMAP like 1
chr7	21928037	21928261	225	*	3.23	3.55	2.25	1.3	0.0137	0.047	Distal Intergenic	7	21891252	21918393	27142	2	100004455	NM_001115127	-9644	ENSDARG00000055163	epoa	erythropoietin a
chr14	40728505	40728669	165	*	1.52	0.84	2.33	-1.49	0.0137	0.047	Distal Intergenic	14	40745834	40797117	51284	2	30396	NM_131159	68448	ENSDARG00000020759	elf1	E74-like ETS transcription factor 1
chr17	51522412	51522647	236	*	3.87	4.16	3	1.16	0.0137	0.047	Distal Intergenic	17	51627209	51638206	10998	1	503524	NM_001012488	-104562	ENSDARG00000038969	zgc:113142	zgc:113142
chr15	28274049	28274188	140	*	1.17	0.31	2.1	-1.78	0.0137	0.047	Intron (NM_001317189/566459, intron 2 of 31)	15	28268141	28351169	83029	1	566459	NM_001317189	5908	ENSDARG00000061579	myo1cb	myosin Ic, paralog b
chr5	25066363	25066851	489	*	4.26	4.56	3.34	1.22	0.0136	0.0465	Distal Intergenic	5	25072949	25075181	2233	1	553805	NM_001020767	-6098	ENSDARG00000002264	mrpl41	mitochondrial ribosomal protein L41
chr1	3235796	3236020	225	*	2.45	2.84	1	1.84	0.0136	0.0465	Intron (NM_001302236/559454, intron 2 of 7)	1	3100244	3295045	194802	2	559454	NM_001302236	59025	ENSDARG00000103647	gpc5a	glypican 5a
chr6	60037475	60037776	302	*	2.73	2.22	3.4	-1.19	0.0136	0.0465	Distal Intergenic	6	60021737	60031695	9959	2	100151758	NM_001127473	-5780	ENSDARG00000104974	slain1b	SLAIN motif family, member 1b
chr11	40382913	40383455	543	*	3.62	3.92	2.74	1.18	0.0136	0.0465	Intron (NM_001080674/791192, intron 2 of 5)	11	40331921	40418975	87055	2	791192	NM_001080674	35520	ENSDARG00000060901	trim62.1	tripartite motif containing 62, tandem duplicate 1
chr21	8171491	8171663	173	*	1.88	1.18	2.7	-1.52	0.0136	0.0465	Distal Intergenic	21	8198652	8259645	60994	1	497167	NM_001033720	-26989	ENSDARG00000014480	nr6a1b	nuclear receptor subfamily 6, group A, member 1b
chr14	36070370	36070579	210	*	1.69	0.96	2.53	-1.57	0.0136	0.0465	Distal Intergenic	14	36226246	36229796	3551	1	30164	NM_130975	-155667	ENSDARG00000036194	pitx2	paired-like homeodomain 2
chr11	27962724	27962977	254	*	5.04	5.35	4.08	1.27	0.0136	0.0465	Intron (NM_001077792/777750, intron 1 of 18)	11	27920336	28050452	130117	2	777750	NM_001077792	87475	ENSDARG00000061737	ece1	endothelin converting enzyme 1
chr20	4156995	4157371	377	*	5.37	5.64	4.63	1.01	0.0136	0.0465	Promoter (<=1kb)	20	4149523	4157138	7616	2	799070	NM_001130794	0	ENSDARG00000078606	zgc:194224	zgc:194224
chr16	16648981	16649242	262	*	3	3.47	0.91	2.56	0.0136	0.0465	Distal Intergenic	16	16665203	16701780	36578	2	794635	NM_001365137	52538	ENSDARG00000038424	c4b	complement 4B (Chido blood group)
chr10	28826760	28827329	570	*	4.33	4.64	3.37	1.27	0.0136	0.0465	Intron (NM_131000/30194, intron 1 of 15)	10	28733021	28835770	102750	2	30194	NM_131000	8441	ENSDARG00000026531	alcama	activated leukocyte cell adhesion molecule a
chr11	11009643	11009948	306	*	1.89	1.23	2.67	-1.44	0.0136	0.0465	Distal Intergenic	11	10832560	10850868	18309	2	799058	NM_001083573	-158775	ENSDARG00000063100	psmd14	proteasome 26S subunit, non-ATPase 14
chr4	76841002	76841256	255	*	2.66	2.15	3.33	-1.18	0.0136	0.0465	Distal Intergenic	4	76775837	76785278	9442	1	100537622	NM_001328009	65165	ENSDARG00000093546	si:ch73-56d11.5	si:ch73-56d11.5
chr3	18532041	18532196	156	*	1.28	0.45	2.18	-1.73	0.0136	0.0465	Distal Intergenic	3	18556098	18562964	6867	1	573110	NM_205749	-23902	ENSDARG00000099441	cbx4	chromobox homolog 4 (Pc class homolog, Drosophila)
chr13	47643198	47643364	167	*	1.91	1.21	2.72	-1.51	0.0136	0.0465	Distal Intergenic	13	47573473	47618847	45375	1	402920	NM_205625	69725	ENSDARG00000026081	lhcgr	luteinizing hormone/choriogonadotropin receptor
chr7	16199102	16199221	120	*	2.36	2.74	1.03	1.71	0.0136	0.0465	Distal Intergenic	7	16205611	16214889	9279	2	100151764	NM_001127479	15668	ENSDARG00000054184	btr06	bloodthirsty-related gene family, member 6
chr15	21971007	21971155	149	*	2.92	2.21	3.76	-1.55	0.0136	0.0465	Exon (NM_001202496/563791, exon 16 of 21)	15	21947113	21981546	34434	1	563791	NM_001202496	23894	ENSDARG00000056896	ttc12	tetratricopeptide repeat domain 12
chr8	41436424	41436549	126	*	5.35	5.02	5.85	-0.83	0.0136	0.0465	Distal Intergenic	8	41453752	41462734	8983	1	393550	NM_200578	-17203	ENSDARG00000041720	arpc5la	actin related protein 2/3 complex, subunit 5-like, a
chr17	17844858	17844982	125	*	1.96	1.23	2.8	-1.57	0.0136	0.0465	Intron (NM_001020619/553646, intron 9 of 11)	17	17804752	17856099	51348	1	553646	NM_001020619	40106	ENSDARG00000018976	sptlc2a	serine palmitoyltransferase, long chain base subunit 2a
chr3	27586176	27586296	121	*	1.05	0.14	2	-1.86	0.0136	0.0465	Distal Intergenic	3	27595038	27601812	6775	2	327299	NM_001328166	15516	ENSDARG00000055383	zgc:66160	zgc:66160
chr24	7323984	7324171	188	*	3.7	4.05	2.57	1.48	0.0136	0.0465	Promoter (2-3kb)	24	7306021	7321928	15908	2	100038776	NM_001089556	-2056	ENSDARG00000008790	actr3b	actin related protein 3B
chr1	37281855	37282291	437	*	3.4	3.74	2.33	1.41	0.0136	0.0465	Exon (NM_001135121/572548, exon 10 of 17)	1	37196106	37304656	108551	1	572548	NM_001135121	85749	ENSDARG00000034093	dclk2a	doublecortin-like kinase 2a
chr18	21389775	21389945	171	*	1.5	0.7	2.39	-1.69	0.0136	0.0465	Exon (NM_001114415/557988, exon 73 of 81)	18	21274051	21400800	126750	1	557988	NM_001114415	115724	ENSDARG00000056764	hydin	HYDIN axonemal central pair apparatus protein
chr23	11006450	11006611	162	*	3.87	3.17	4.69	-1.52	0.0136	0.0465	Distal Intergenic	23	10805186	10826997	21812	1	326723	NM_001115140	201264	ENSDARG00000026540	ppp4r2a	protein phosphatase 4, regulatory subunit 2a
chr2	2180640	2180810	171	*	2.88	3.21	1.83	1.38	0.0136	0.0465	Distal Intergenic	2	2168547	2173748	5202	1	373084	NM_200100	12093	ENSDARG00000022303	higd1a	HIG1 hypoxia inducible domain family, member 1A
chr22	37643878	37644008	131	*	1.63	0.88	2.49	-1.6	0.0136	0.0465	Exon (NM_201184/554967, exon 7 of 25)	22	37631234	37716627	85394	1	554967	NM_201184	12644	ENSDARG00000003189	psmd1	proteasome 26S subunit, non-ATPase 1
chr25	22926476	22926694	219	*	3.19	3.54	2.06	1.48	0.0136	0.0465	Distal Intergenic	25	22863028	22889476	26449	2	436637	NM_001002364	-37000	ENSDARG00000023214	mob2a	MOB kinase activator 2a
chr23	5856204	5856323	120	*	2.44	1.66	3.31	-1.65	0.0136	0.0465	Distal Intergenic	23	5765514	5783404	17891	2	378726	NM_205567	-72800	ENSDARG00000006603	csrp1a	cysteine and glycine-rich protein 1a
chr17	48915732	48915923	192	*	3.26	3.6	2.2	1.4	0.0136	0.0465	Distal Intergenic	17	48921829	48935872	14044	2	403338	NM_212816	19949	ENSDARG00000006840	gnmt	glycine N-methyltransferase
chr6	11051436	11051555	120	*	1.18	0.26	2.14	-1.87	0.0136	0.0465	Distal Intergenic	6	11070260	11073897	3638	2	406398	NM_213124	22342	ENSDARG00000028119	sumo3a	small ubiquitin like modifier 3a
chr17	4103205	4103599	395	*	4.43	4.8	3.19	1.61	0.0136	0.0465	Distal Intergenic	17	4030493	4063546	33054	1	402827	NM_001083542	72712	ENSDARG00000024160	hao1	hydroxyacid oxidase (glycolate oxidase) 1
chr17	38819347	38819479	133	*	1.04	0.21	1.95	-1.74	0.0136	0.0465	Exon (NM_001017770/550467, exon 4 of 18)	17	38784376	38887379	103004	2	550467	NM_001017770	67900	ENSDARG00000015425	slc24a4a	solute carrier family 24 member 4a
chr5	54804063	54804207	145	*	2.36	1.8	3.07	-1.26	0.0136	0.0465	Distal Intergenic	5	54767133	54792242	25110	2	557176	NM_001281844	-11821	ENSDARG00000038524	pik3r1	phosphoinositide-3-kinase, regulatory subunit 1 (alpha)
chr4	11630080	11630531	452	*	3.64	3.16	4.28	-1.12	0.0136	0.0465	Distal Intergenic	4	11608196	11608283	88	2	100033606	NR_030037	-21797	ENSDARG00000081284	mir29b-2	microRNA 29b-2
chr5	20112372	20112849	478	*	4.94	5.21	4.2	1	0.0136	0.0465	Promoter (<=1kb)	5	20112032	20113286	1255	1	558956	NM_001204169	340	ENSDARG00000086374	isg15	ISG15 ubiquitin like modifier
chr8	29078052	29078463	412	*	3.96	4.33	2.67	1.66	0.0136	0.0465	Intron (NM_001004123/448841, intron 2 of 15)	8	28900689	29587696	687008	1	448841	NM_001004123	177363	ENSDARG00000055302	grid2	glutamate receptor, ionotropic, delta 2
chr24	13533246	13533514	269	*	2.78	2.18	3.53	-1.35	0.0136	0.0465	Distal Intergenic	24	13635390	13714108	78719	1	474353	NM_001007066	-101876	ENSDARG00000031875	trpa1b	transient receptor potential cation channel, subfamily A, member 1b
chr4	11736857	11737049	193	*	0.96	0.16	1.86	-1.7	0.0136	0.0465	Exon (NM_001045016/563365, exon 7 of 8)	4	11732157	11751037	18881	2	563365	NM_001045016	13988	ENSDARG00000031228	podxl	podocalyxin-like
chr9	2084076	2084206	131	*	4.21	3.83	4.76	-0.93	0.0136	0.0465	Distal Intergenic	9	2020821	2045512	24692	1	326761	NM_199480	63255	ENSDARG00000115902	lnpa	limb and neural patterns a
chr8	11318501	11318728	228	*	1.55	0.77	2.42	-1.65	0.0136	0.0465	Intron (NM_001004579/447840, intron 1 of 14)	8	11234168	11324055	89888	2	447840	NM_001004579	5327	ENSDARG00000006508	pip5k1bb	phosphatidylinositol-4-phosphate 5-kinase, type I, beta b
chr12	33137460	33137714	255	*	3.27	3.6	2.22	1.39	0.0136	0.0466	Distal Intergenic	12	33297572	33314894	17323	2	550573	NM_001017875	177180	ENSDARG00000088878	c1qtnf1	C1q and TNF related 1
chr3	60954477	60954644	168	*	2.43	2.81	1.1	1.7	0.0136	0.0466	Promoter (2-3kb)	3	60957516	61034551	77036	1	406550	NM_213266	-2872	ENSDARG00000030560	helz	helicase with zinc finger
chr21	45363702	45364051	350	*	5.95	6.2	5.26	0.94	0.0136	0.0466	Promoter (<=1kb)	21	45351660	45363871	12212	2	393885	NM_200911	0	ENSDARG00000053404	zgc:56064	zgc:56064
chr25	13474279	13474411	133	*	1.31	0.52	2.2	-1.68	0.0136	0.0466	Exon (NM_199873/334208, exon 11 of 11)	25	13473940	13490697	16758	2	334208	NM_199873	16286	ENSDARG00000038845	ldhd	lactate dehydrogenase D
chr14	25385108	25385352	245	*	2.5	1.99	3.18	-1.19	0.0136	0.0466	Distal Intergenic	14	25505474	25510955	5482	1	445302	NM_001003758	-120122	ENSDARG00000056517	thoc3	THO complex 3
chr18	46917487	46917706	220	*	3.24	3.54	2.33	1.21	0.0136	0.0466	Distal Intergenic	18	46699731	46763170	63440	2	100332110	NM_001282486	-154317	ENSDARG00000061031	dner	delta/notch-like EGF repeat containing
chr17	17816196	17816438	243	*	2.37	1.81	3.08	-1.27	0.0136	0.0466	Intron (NM_001020619/553646, intron 5 of 11)	17	17804752	17856099	51348	1	553646	NM_001020619	11444	ENSDARG00000018976	sptlc2a	serine palmitoyltransferase, long chain base subunit 2a
chr20	7573469	7573982	514	*	3.73	4.07	2.67	1.4	0.0136	0.0466	Distal Intergenic	20	7584211	7593102	8892	1	606665	NM_001033101	-10229	ENSDARG00000046081	bloc1s2	biogenesis of lysosomal organelles complex-1, subunit 2
chr2	19994740	19994921	182	*	1.8	1.11	2.62	-1.51	0.0136	0.0466	Intron (NM_212893/405829, intron 11 of 22)	2	19825299	20120173	294875	2	405829	NM_212893	125252	ENSDARG00000010267	dpydb	dihydropyrimidine dehydrogenase b
chr17	12483856	12483975	120	*	2.13	1.27	3.05	-1.79	0.0136	0.0466	Intron (NM_001045342/751598, intron 1 of 3)	17	12443331	12498096	54766	2	751598	NM_001045342	14121	NA	emilin1b	elastin microfibril interfacer 1b
chr9	26306290	26306437	148	*	1.8	2.2	0.36	1.83	0.0136	0.0466	Distal Intergenic	9	26103814	26123706	19893	1	30219	NM_131023	202476	ENSDARG00000020164	efnb2a	ephrin-B2a
chr17	3015135	3015307	173	*	2.05	1.38	2.85	-1.47	0.0136	0.0466	Distal Intergenic	17	3020946	3051096	30151	2	103909004	NR_137318	35789	NA	tunar	TCL1 upstream neural differentiation-associated RNA
chr8	3606363	3606619	257	*	4.06	3.4	4.86	-1.46	0.0136	0.0466	Distal Intergenic	8	3649070	3674506	25437	1	445154	NM_001003548	-42451	ENSDARG00000058425	rab35b	RAB35, member RAS oncogene family b
chr13	46901454	46901574	121	*	3.57	2.72	4.48	-1.77	0.0136	0.0466	Distal Intergenic	13	46834951	46882100	47150	2	563580	NM_001030177	-19354	ENSDARG00000101289	slc29a1a	solute carrier family 29 member 1a
chr20	33836248	33836379	132	*	3.22	2.62	3.97	-1.35	0.0136	0.0466	Intron (NM_001110519/558071, intron 11 of 15)	20	33811556	33864696	53141	2	558071	NM_001110519	28317	ENSDARG00000012656	atf6	activating transcription factor 6
chr22	38392200	38392388	189	*	3.96	4.31	2.78	1.53	0.0136	0.0466	Promoter (1-2kb)	22	38337216	38391139	53924	2	100003170	NM_001114476	-1061	NA	mark1	MAP/microtubule affinity-regulating kinase 1
chr18	3539931	3540444	514	*	3.55	3.82	2.76	1.06	0.0136	0.0466	Exon (NM_213331/406622, exon 6 of 11)	18	3535853	3552448	16596	2	406622	NM_213331	12004	ENSDARG00000100363	dcun1d5	DCN1, defective in cullin neddylation 1, domain containing 5 (S. cerevisiae)
chr8	9024090	9024436	347	*	3.94	3.39	4.65	-1.27	0.0136	0.0466	Intron (NM_200092/368488, intron 7 of 7)	8	8973425	9029176	55752	1	368488	NM_200092	50665	ENSDARG00000044972	bcap31	B cell receptor associated protein 31
chr21	26660029	26660351	323	*	4.4	4.69	3.58	1.1	0.0136	0.0466	Promoter (2-3kb)	21	26657473	26664826	7354	1	554105	NM_001024406	2556	ENSDARG00000055064	prdx5	peroxiredoxin 5
chr10	34410337	34410480	144	*	1.64	0.95	2.46	-1.51	0.0136	0.0466	Distal Intergenic	10	34426256	34734995	308740	1	541373	NM_001013500	-15776	ENSDARG00000070080	nbeaa	neurobeachin a
chr2	33473633	33473749	117	*	1.04	0.16	1.98	-1.82	0.0136	0.0466	Distal Intergenic	2	33457310	33466370	9061	1	541359	NM_001013486	16323	ENSDARG00000038794	zgc:113531	zgc:113531
chr14	49477710	49477922	213	*	2.87	3.23	1.67	1.56	0.0136	0.0466	Exon (NM_001017782/550479, exon 7 of 14)	14	49462855	49490736	27882	1	550479	NM_001017782	14855	ENSDARG00000023988	dctn4	dynactin 4
chr20	11005433	11005552	120	*	2.63	2.07	3.35	-1.28	0.0136	0.0466	Distal Intergenic	20	11103708	11105696	1989	2	571972	NM_001100043	100144	ENSDARG00000079355	flrt2	fibronectin leucine rich transmembrane protein 2
chr9	38776782	38777047	266	*	3.56	3.86	2.66	1.2	0.0136	0.0466	Distal Intergenic	9	38728497	38729525	1029	1	795861	NM_001105135	48285	NA	tas2r3	taste receptor, type 2, member 3
chr6	4254742	4254979	238	*	2.97	3.33	1.77	1.56	0.0136	0.0466	Distal Intergenic	6	3984842	3998199	13358	2	393217	NM_200247	-256543	ENSDARG00000040455	unc50	unc-50 homolog (C. elegans)
chr3	49415701	49415820	120	*	3.04	2.2	3.95	-1.76	0.0136	0.0466	Distal Intergenic	3	49425791	49447949	22159	2	768149	NM_001316989	32129	ENSDARG00000102810	samd1a	sterile alpha motif domain containing 1a
chr3	54686243	54686379	137	*	1.94	2.34	0.5	1.84	0.0136	0.0466	Distal Intergenic	3	54616015	54669185	53171	2	170457	NM_001159970	-17058	ENSDARG00000036548	s1pr2	sphingosine-1-phosphate receptor 2
chr12	33767811	33768239	429	*	2.69	2.1	3.44	-1.33	0.0136	0.0466	Exon (NM_212582/795670, exon 3 of 26)	12	33738361	33788952	50592	2	795670	NM_212582	20713	ENSDARG00000023920	llgl2	LLGL scribble cell polarity complex component 2
chr23	24366387	24366937	551	*	4.07	4.43	2.82	1.61	0.0136	0.0466	Distal Intergenic	23	24300513	24343363	42851	2	619198	NM_001033590	-23024	ENSDARG00000037320	fam131c	family with sequence similarity 131 member C
chr6_KZ115165v1_alt	48596	48745	150	*	2.18	2.58	0.76	1.82	0.0136	0.0466	Distal Intergenic	254	24147	44434	20288	2	768287	NM_001077452	-4162	ENSDARG00000005221	desmb	desmin b
chr3	38453401	38453698	298	*	1.76	1.02	2.61	-1.59	0.0136	0.0466	Intron (NM_214788/407669, intron 4 of 12)	3	37824268	38625944	801677	1	407669	NM_214788	629133	ENSDARG00000006849	asic2	acid-sensing (proton-gated) ion channel 2
chr9	13126449	13126709	261	*	3.18	3.52	2.1	1.42	0.0136	0.0466	Intron (NM_001128362/100003476, intron 1 of 7)	9	13120585	13212749	92165	1	100003476	NM_001128362	5864	ENSDARG00000009839	fam117bb	family with sequence similarity 117 member Bb
chr8	25807948	25808185	238	*	2.41	1.77	3.19	-1.42	0.0136	0.0466	3' UTR	8	25767768	25808337	40570	1	405791	NM_214726	40180	ENSDARG00000042552	cacna1sb	calcium channel, voltage-dependent, L type, alpha 1S subunit, b
chr3	56956695	56956902	208	*	4.16	3.43	5.01	-1.58	0.0136	0.0466	Distal Intergenic	3	56861113	56871330	10218	2	550424	NM_001017729	-85365	ENSDARG00000001804	zgc:112148	zgc:112148
chr11	9474023	9474371	349	*	2.34	1.72	3.11	-1.38	0.0136	0.0466	Distal Intergenic	11	9564154	9948487	384334	2	100002610	NM_001142265	474116	ENSDARG00000077710	nlgn1	neuroligin 1
chr3	47563578	47563699	122	*	2.6	1.81	3.49	-1.68	0.0136	0.0467	Distal Intergenic	3	47322494	47387381	64888	1	559124	NM_001079978	241084	ENSDARG00000069940	ppap2d	phosphatidic acid phosphatase type 2D
chr19	39137545	39137692	148	*	4.02	2.8	5.12	-2.33	0.0136	0.0467	Distal Intergenic	19	38422059	38467664	45606	1	321212	NM_212579	715486	ENSDARG00000024492	col9a2	procollagen, type IX, alpha 2
chr2	33730022	33730147	126	*	1.8	1.14	2.6	-1.46	0.0136	0.0467	Distal Intergenic	2	33681202	33687214	6013	2	321724	NM_199561	-42808	ENSDARG00000031681	atp6v0b	ATPase H+ transporting V0 subunit b
chr4	5476420	5476576	157	*	2.37	1.79	3.1	-1.31	0.0136	0.0467	Distal Intergenic	4	5506959	5522437	15479	1	415185	NM_001002095	-30383	ENSDARG00000045836	mapk11	mitogen-activated protein kinase 11
chr17	8169398	8170123	726	*	3.85	3.44	4.43	-0.99	0.0136	0.0467	Distal Intergenic	17	8212477	8228712	16236	1	550539	NM_001017841	-42354	ENSDARG00000044047	slc18b1	solute carrier family 18 member B1
chr13	23305665	23305784	120	*	3.29	2.04	4.4	-2.37	0.0136	0.0467	Intron (NM_001077290/768147, intron 1 of 9)	13	23282615	23388134	105520	1	768147	NM_001077290	23050	ENSDARG00000069469	khdrbs2	KH domain containing, RNA binding, signal transduction associated 2
chr19	24828525	24828784	260	*	3.34	3.67	2.33	1.34	0.0136	0.0467	Distal Intergenic	19	24882826	24889226	6401	1	768159	NM_001077302	-54042	ENSDARG00000016623	si:ch211-195b13.1	si:ch211-195b13.1
chr12	16196614	16196733	120	*	3.25	2.41	4.17	-1.75	0.0136	0.0467	Distal Intergenic	12	16284100	16288285	4186	1	393807	NM_200834	-87367	ENSDARG00000014554	ppp1r3cb	protein phosphatase 1, regulatory subunit 3Cb
chr15	35751468	35751594	127	*	0.78	-0.13	1.73	-1.85	0.0136	0.0467	Distal Intergenic	15	35933094	35944902	11809	1	550277	NM_001017614	-181500	ENSDARG00000021046	rhbdd1	rhomboid domain containing 1
chr7	54824773	54824901	129	*	4.22	3.85	4.76	-0.92	0.0136	0.0467	Distal Intergenic	7	54670054	54677422	7369	2	30222	NM_131025	-147351	ENSDARG00000101637	ccnd1	cyclin D1
chr13	3962238	3962747	510	*	4.23	4.51	3.39	1.12	0.0136	0.0467	Distal Intergenic	13	3938580	3950673	12094	1	334511	NM_199907	23658	ENSDARG00000020449	yipf3	Yip1 domain family, member 3
chr16	34532274	34532457	184	*	2.15	1.42	2.99	-1.57	0.0136	0.0467	Exon (NM_183345/368256, exon 2 of 2)	16	34522977	34532888	9912	1	368256	NM_183345	9297	ENSDARG00000034907	paqr7b	progestin and adipoQ receptor family member VII, b
chr9	53164693	53165136	444	*	4.17	4.45	3.37	1.08	0.0136	0.0467	Distal Intergenic	9	53276356	53277700	1345	1	406246	NM_001009888	-111220	ENSDARG00000008540	sox21b	SRY-box transcription factor 21b
chr25	3105059	3105205	147	*	3.9	3.09	4.79	-1.7	0.0136	0.0467	Distal Intergenic	25	3059105	3066067	6963	1	447823	NM_001004562	45954	ENSDARG00000007975	fth1b	ferritin, heavy polypeptide 1b
chr7	63536794	63537072	279	*	2.97	3.34	1.76	1.58	0.0136	0.0467	Intron (NM_001365653/555504, intron 2 of 2)	7	63325026	63573056	248031	1	555504	NM_001365653	211768	ENSDARG00000060610	pcdh7b	protocadherin 7b
chr10	1696970	1697189	220	*	3.76	4.06	2.87	1.19	0.0136	0.0467	Promoter (<=1kb)	10	1686975	1697121	10147	2	405835	NM_001312899	0	ENSDARG00000008097	srsf9	serine and arginine rich splicing factor 9
chr25	15266179	15266302	124	*	1.49	0.77	2.33	-1.56	0.0136	0.0467	Distal Intergenic	25	15273370	15285582	12213	1	541488	NM_001014301	-7068	ENSDARG00000031890	tcp11l1	t-complex 11, testis-specific-like 1
chr1	42633054	42633232	179	*	2.45	2.79	1.35	1.45	0.0136	0.0467	Intron (NM_001159372/567500, intron 5 of 15)	1	42279716	43035079	755364	1	567500	NM_001159372	353338	ENSDARG00000024785	ctnna2	catenin (cadherin-associated protein), alpha 2
chr11	42260260	42260587	328	*	2.5	1.88	3.27	-1.4	0.0136	0.0467	Distal Intergenic	11	42307565	42417686	110122	2	572011	NM_001077254	157099	ENSDARG00000054458	slmapa	sarcolemma associated protein a
chr18_KZ115572v1_alt	104115	104256	142	*	1.73	1	2.58	-1.58	0.0136	0.0467	Distal Intergenic	754	152901	165026	12126	2	562852	NM_001128247	60770	ENSDARG00000053036	olfcr1	olfactory receptor C family, r1
chr21	40533119	40533702	584	*	3.57	3.05	4.25	-1.2	0.0136	0.0467	Distal Intergenic	21	40484088	40529183	45096	1	393367	NM_200396	49031	ENSDARG00000102272	coro6	coronin 6
chr12	31503711	31503896	186	*	1.35	0.56	2.23	-1.66	0.0136	0.0467	Distal Intergenic	12	31476169	31484677	8509	2	494051	NM_001008594	-19034	ENSDARG00000045268	tectb	tectorin beta
chr10	58239	58358	120	*	3.02	2.33	3.84	-1.52	0.0136	0.0467	Distal Intergenic	10	63016	74424	11409	2	100005019	NM_001080689	16066	ENSDARG00000063570	dyrk1aa	dual-specificity tyrosine-(Y)-phosphorylation regulated kinase 1A, a
chr17	44584405	44585093	689	*	5.13	5.36	4.49	0.87	0.0136	0.0467	Distal Intergenic	17	44463192	44476708	13517	1	100192212	NM_001136249	121213	ENSDARG00000079686	naa30	N(alpha)-acetyltransferase 30, NatC catalytic subunit
chrUn_KN150127v1	13169	13424	256	*	3.8	3.13	4.6	-1.47	0.0136	0.0467	Distal Intergenic	1335	17150	17259	110	1	100628804	NR_039380	-3726	NA	mir2189	microRNA mir-2189
chr4_KZ115085v1_alt	177688	178016	329	*	2.83	2.24	3.57	-1.33	0.0136	0.0467	Distal Intergenic	142	214596	232971	18376	2	406575	NM_213286	54955	ENSDARG00000006029	lta4h	leukotriene A4 hydrolase
chr7	47611630	47611854	225	*	1.32	0.51	2.22	-1.7	0.0136	0.0467	Distal Intergenic	7	48240707	48251237	10531	2	30702	NM_131427	639383	ENSDARG00000008454	cpeb1b	cytoplasmic polyadenylation element binding protein 1b
chr25	32423758	32423936	179	*	1.63	0.88	2.48	-1.59	0.0136	0.0467	Distal Intergenic	25	32390817	32400204	9388	1	792268	NM_001007432	32941	ENSDARG00000004059	galk2	galactokinase 2
chr20	32296822	32297033	212	*	3.66	3.97	2.73	1.24	0.0136	0.0467	Intron (NM_131085/30296, intron 2 of 3)	20	32286783	32332736	45954	2	30296	NM_131085	35703	ENSDARG00000042904	foxo3b	forkhead box O3b
chr15	36352430	36353010	581	*	3.91	3.4	4.58	-1.18	0.0136	0.0467	Distal Intergenic	15	36228894	36248142	19249	2	100333936	NM_001326409	-104288	ENSDARG00000054055	ostn	osteocrin
chr11	23121486	23121605	120	*	1.75	0.81	2.71	-1.9	0.0136	0.0467	Distal Intergenic	11	22993029	23080960	87932	2	768304	NM_001077467	-40526	ENSDARG00000044902	atp2b4	ATPase plasma membrane Ca2+ transporting 4
chr12	38111994	38112261	268	*	1.8	1.15	2.59	-1.44	0.0136	0.0467	Distal Intergenic	12	38556491	38561296	4806	1	436759	NM_001002486	-444230	ENSDARG00000006413	rpl38	ribosomal protein L38
chr14	7390033	7390309	277	*	2.65	2.12	3.35	-1.23	0.0136	0.0467	Exon (NM_001302256/447847, exon 11 of 14)	14	7377587	7395997	18411	1	447847	NM_001302256	12446	ENSDARG00000003693	hars	histidyl-tRNA synthetase
chr7	19026301	19026815	515	*	2.78	2.13	3.57	-1.44	0.0136	0.0467	Distal Intergenic	7	19033883	19043391	9509	2	100101464	NM_001100106	16576	ENSDARG00000103276	fcer1g	Fc fragment of IgE, high affinity I, receptor for; gamma polypeptide
chr21	30616767	30616986	220	*	1.38	0.58	2.26	-1.68	0.0136	0.0467	Distal Intergenic	21	30562441	30597184	34744	1	100005187	NM_001366697	54326	ENSDARG00000110266	wu:fj42b12	wu:fj42b12
chr16	25598532	25598651	120	*	3.64	2.29	4.79	-2.49	0.0135	0.0462	Promoter (<=1kb)	16	25593339	25597869	4531	2	548347	NM_001017551	-663	ENSDARG00000004308	fam8a1b	family with sequence similarity 8 member A1b
chr22	18252946	18253174	229	*	4.02	2.86	5.1	-2.24	0.0135	0.0462	Promoter (1-2kb)	22	18254769	18254855	87	1	100033555	NR_029996	-1595	ENSDARG00000083496	mir9-4	microRNA 9-4
chr17	37267659	37268069	411	*	3.11	2.58	3.8	-1.21	0.0135	0.0462	Distal Intergenic	17	37287852	37299394	11543	2	553234	NM_001256223	31325	ENSDARG00000070673	ptgr2	prostaglandin reductase 2
chr4	5192273	5192454	182	*	2.05	2.44	0.65	1.79	0.0135	0.0462	Promoter (<=1kb)	4	5193257	5194972	1716	1	494456	NM_001009564	-803	ENSDARG00000045854	fgf23	fibroblast growth factor 23
chr4	4809790	4810010	221	*	1.4	0.51	2.34	-1.83	0.0135	0.0462	Intron (NM_001089551/100038771, intron 1 of 14)	4	4804032	4832149	28118	1	100038771	NM_001089551	5758	ENSDARG00000059053	slc13a4	solute carrier family 13 member 4
chr21	1741152	1741579	428	*	4.55	4	5.27	-1.27	0.0135	0.0462	Distal Intergenic	21	1780790	1799262	18473	2	553510	NM_001113432	57683	ENSDARG00000045301	st8sia3	ST8 alpha-N-acetyl-neuraminide alpha-2,8-sialyltransferase 3
chr1	26509414	26509843	430	*	4.15	3.71	4.77	-1.07	0.0135	0.0462	Distal Intergenic	1	26467193	26507638	40446	1	393124	NM_200155	42221	ENSDARG00000019581	uso1	USO1 vesicle transport factor
chr9	2624254	2624540	287	*	2.06	1.41	2.85	-1.44	0.0135	0.0463	Distal Intergenic	9	2591966	2594394	2429	2	405896	NM_212960	-29860	ENSDARG00000099374	sp9	sp9 transcription factor
chr25	32085020	32085139	120	*	2.38	1.72	3.17	-1.45	0.0135	0.0463	Distal Intergenic	25	31900825	31907668	6844	2	394189	NM_201214	-177352	ENSDARG00000012603	eif3ja	eukaryotic translation initiation factor 3, subunit Ja
chr25	36326965	36327144	180	*	3.08	3.41	2.07	1.34	0.0135	0.0463	Promoter (<=1kb)	25	36327031	36327906	876	1	541350	NM_001013477	0	ENSDARG00000077456	zgc:110216	zgc:110216
chr21	18646767	18647179	413	*	2.62	2.07	3.33	-1.26	0.0135	0.0463	Distal Intergenic	21	18877130	18890892	13763	1	793688	NM_001100052	-229951	ENSDARG00000093234	si:dkey-65l23.2	si:dkey-65l23.2
chr15	4363562	4363764	203	*	1.65	0.88	2.52	-1.64	0.0135	0.0463	Intron (NM_131670/64272, intron 5 of 6)	15	4353163	4415803	62641	2	64272	NM_131670	52039	ENSDARG00000042837	atp1b3b	ATPase Na+/K+ transporting subunit beta 3b
chr13	49417961	49418180	220	*	2.34	2.7	1.1	1.6	0.0135	0.0463	Distal Intergenic	13	49442073	49444636	2564	2	335866	NM_199981	26456	ENSDARG00000004702	irf2bp2a	interferon regulatory factor 2 binding protein 2a
chr5	9538188	9538313	126	*	2.09	2.49	0.58	1.91	0.0135	0.0463	Distal Intergenic	5	9428847	9438370	9524	1	100384892	NM_001177335	109341	NA	NA	NA
chr2	15778511	15778663	153	*	1.77	1.15	2.54	-1.39	0.0135	0.0463	Distal Intergenic	2	15612763	15626970	14208	1	406539	NM_213011	165748	ENSDARG00000013856	amy2a	amylase alpha 2A
chr18_KZ114960v1_alt	184588	184735	148	*	1.18	1.62	-0.66	2.28	0.0135	0.0463	Distal Intergenic	712	7256	61506	54251	2	386641	NM_198372	-123082	ENSDARG00000026865	fam107b	family with sequence similarity 107 member B
chr14	47933098	47933503	406	*	2.31	1.6	3.14	-1.55	0.0135	0.0463	Distal Intergenic	14	48045193	48065365	20173	1	415155	NM_001002065	-111690	ENSDARG00000038835	ppid	peptidylprolyl isomerase D
chr24	19628941	19629250	310	*	3.56	3.93	2.3	1.64	0.0135	0.0463	Distal Intergenic	24	19707610	19718077	10468	2	322795	NM_199619	88827	ENSDARG00000038429	csrnp1b	cysteine-serine-rich nuclear protein 1b
chr11	22097882	22098166	285	*	3.52	3.82	2.62	1.2	0.0135	0.0463	Distal Intergenic	11	21910752	22089467	178716	1	557245	NM_001199491	187130	ENSDARG00000076120	foxp4	forkhead box P4
chr23	31101648	31101866	219	*	3.65	3.95	2.75	1.2	0.0135	0.0463	Distal Intergenic	23	31107702	31118371	10670	1	572713	NM_153665	-5836	ENSDARG00000036930	tbx18	T-box transcription factor 18
chr6	55906759	55907192	434	*	4.1	4.4	3.19	1.21	0.0135	0.0463	Downstream (2-3kb)	6	55852274	55864687	12414	2	100004700	NM_001089458	-42072	ENSDARG00000103277	cyp24a1	cytochrome P450, family 24, subfamily A, polypeptide 1
chr18	4382177	4382436	260	*	2.54	1.97	3.26	-1.3	0.0135	0.0463	Distal Intergenic	18	5087622	5111449	23828	2	393527	NM_200555	729013	ENSDARG00000035054	pdcd10a	programmed cell death 10a
chr23	9393601	9393780	180	*	1.26	1.71	-0.66	2.37	0.0135	0.0463	Distal Intergenic	23	9508540	9551956	43417	1	334206	NM_199872	-114760	ENSDARG00000013830	osbpl2b	oxysterol binding protein-like 2b
chr7	12112635	12112867	233	*	2.58	2.96	1.27	1.69	0.0135	0.0463	Distal Intergenic	7	12061787	12065668	3882	2	569582	NM_001080993	-46967	ENSDARG00000058369	mex3b	mex-3 RNA binding family member B
chr3	53421660	53422028	369	*	2.34	1.76	3.07	-1.3	0.0135	0.0463	Distal Intergenic	3	53457189	53465252	8064	2	407626	NM_001077272	43224	ENSDARG00000039116	nr5a5	nuclear receptor subfamily 5, group A, member 5
chr21	29259360	29259534	175	*	1.73	0.98	2.58	-1.6	0.0135	0.0463	Distal Intergenic	21	29102392	29110171	7780	2	436707	NM_001002434	-149189	ENSDARG00000040178	havcr1	hepatitis A virus cellular receptor 1
chr5	18146955	18147136	182	*	1.74	1.1	2.52	-1.42	0.0135	0.0463	Distal Intergenic	5	18012185	18035165	22981	1	393414	NM_200442	134770	ENSDARG00000013058	ascc2	activating signal cointegrator 1 complex subunit 2
chr3	43862651	43862878	228	*	1.95	1.15	2.84	-1.7	0.0135	0.0463	Distal Intergenic	3	43826014	43831030	5017	1	431731	NM_001002184	36637	ENSDARG00000103483	litaf	lipopolysaccharide-induced TNF factor
chr6	27727608	27727980	373	*	3.27	2.78	3.93	-1.15	0.0135	0.0463	Intron (NM_001034179/558900, intron 1 of 8)	6	27667359	27876505	209147	1	558900	NM_001034179	60249	ENSDARG00000034522	rab6ba	RAB6B, member RAS oncogene family a
chr19	14293055	14293174	120	*	2.95	2.42	3.65	-1.23	0.0135	0.0463	Distal Intergenic	19	14187540	14191592	4053	2	30399	NM_131162	-101463	ENSDARG00000101576	tbxta	T-box transcription factor Ta
chr7	7808227	7808560	334	*	3.62	3.98	2.37	1.61	0.0135	0.0463	Promoter (1-2kb)	7	7806745	7810286	3542	2	100003911	NM_001113651	1726	ENSDARG00000102776	cxcl19	chemokine (C-X-C motif) ligand 19
chr5	19461473	19461753	281	*	2.94	3.28	1.83	1.45	0.0135	0.0463	Exon (NM_001114682/556864, exon 15 of 25)	5	19448078	19472121	24044	1	556864	NM_001114682	13395	ENSDARG00000061960	ube3b	ubiquitin protein ligase E3B
chr2	205578	205817	240	*	3.97	4.3	2.94	1.37	0.0135	0.0463	Promoter (<=1kb)	2	205763	211064	5302	1	550593	NM_001017894	0	ENSDARG00000038271	zgc:113293	zgc:113293
chr19	4384177	4384484	308	*	3.8	2.99	4.7	-1.71	0.0135	0.0463	Distal Intergenic	19	4464249	4531049	66801	1	799704	NM_001128549	-79765	ENSDARG00000104563	kcnk9	potassium channel, subfamily K, member 9
chr22	14079751	14079963	213	*	2.3	2.68	0.99	1.69	0.0135	0.0463	Intron (NM_001278817/570457, intron 33 of 34)	22	14051894	14083583	31690	1	570457	NM_001278817	27857	ENSDARG00000020054	aox6	aldehyde oxidase 6
chr8	19558211	19558440	230	*	2.02	1.37	2.81	-1.44	0.0135	0.0463	Intron (NM_001115094/58065, intron 1 of 33)	8	19548985	19619792	70808	1	58065	NM_001115094	9226	ENSDARG00000043130	notch2	notch receptor 2
chr5	64805407	64806015	609	*	3.05	2.59	3.69	-1.1	0.0135	0.0463	Distal Intergenic	5	64814195	64831192	16998	2	558010	NM_001326396	25177	ENSDARG00000052154	lix1	limb and CNS expressed 1
chr7	47751809	47751936	128	*	2	1.36	2.79	-1.43	0.0135	0.0463	Distal Intergenic	7	48240707	48251237	10531	2	30702	NM_131427	499301	ENSDARG00000008454	cpeb1b	cytoplasmic polyadenylation element binding protein 1b
chr7	50291763	50292026	264	*	3.85	4.17	2.86	1.31	0.0135	0.0463	Distal Intergenic	7	50287933	50288019	87	2	100033643	NR_030074	-3744	ENSDARG00000083082	mir129-2	microRNA 129-2
chr20	27351669	27351788	120	*	2	1.41	2.74	-1.33	0.0135	0.0463	Distal Intergenic	20	27371786	27381642	9857	2	565064	NM_001045071	29854	ENSDARG00000005924	serpina10a	serpin peptidase inhibitor, clade A (alpha-1 antiproteinase, antitrypsin), member 10a
chr3	27469675	27469911	237	*	1.75	1.01	2.6	-1.6	0.0135	0.0463	Distal Intergenic	3	27595038	27601812	6775	2	327299	NM_001328166	131901	ENSDARG00000055383	zgc:66160	zgc:66160
chr15	45318428	45318577	150	*	0.98	0.14	1.89	-1.75	0.0135	0.0463	Promoter (<=1kb)	15	45315949	45318785	2837	2	105667211	NM_001308063	208	NA	cd80/86	cluster of Differentiation 80/86
chr7	12167050	12167229	180	*	1.72	1.06	2.52	-1.46	0.0135	0.0463	Distal Intergenic	7	12061787	12065668	3882	2	569582	NM_001080993	-101382	ENSDARG00000058369	mex3b	mex-3 RNA binding family member B
chr9	31540809	31541192	384	*	2.3	1.66	3.09	-1.43	0.0135	0.0463	Distal Intergenic	9	31497901	31525075	27175	2	560605	NM_001173502	-15734	ENSDARG00000020447	tmtc4	transmembrane O-mannosyltransferase targeting cadherins 4
chr20	7705525	7705879	355	*	4.16	4.52	2.97	1.55	0.0135	0.0463	Distal Intergenic	20	7584211	7593102	8892	1	606665	NM_001244756	121314	ENSDARG00000046081	bloc1s2	biogenesis of lysosomal organelles complex-1, subunit 2
chr22	16992056	16992434	379	*	3.91	4.26	2.79	1.47	0.0135	0.0463	Exon (NM_001079962/556665, exon 2 of 11)	22	16839471	16997475	158005	2	556665	NM_001079962	5041	ENSDARG00000062420	nfia	nuclear factor I/A
chr9	21827390	21827534	145	*	1.44	1.85	-0.07	1.92	0.0135	0.0463	Promoter (<=1kb)	9	21826724	21831588	4865	1	569993	NM_001126455	666	ENSDARG00000069846	zgc:162944	zgc:162944
chr10	34684475	34684753	279	*	2.5	1.73	3.37	-1.64	0.0135	0.0463	Exon (NM_001013500/541373, exon 32 of 59)	10	34426256	34734995	308740	1	541373	NM_001013500	258219	ENSDARG00000070080	nbeaa	neurobeachin a
chr17	53347819	53348119	301	*	3.25	2.79	3.87	-1.08	0.0135	0.0463	Distal Intergenic	17	53324006	53329763	5758	2	751755	NM_001045465	-18056	ENSDARG00000098669	exd1	exonuclease 3'-5' domain containing 1
chr25	2578610	2578772	163	*	2.12	2.5	0.78	1.71	0.0135	0.0463	Distal Intergenic	25	2668876	2702935	34060	1	768303	NM_001077466	-90104	ENSDARG00000063522	bbs4	Bardet-Biedl syndrome 4
chr17	32082504	32082656	153	*	1.3	0.55	2.16	-1.61	0.0135	0.0463	Distal Intergenic	17	31820541	31823666	3126	1	503749	NM_001013327	261963	ENSDARG00000102144	eef1akmt2	EEF1A lysine methyltransferase 2
chr22	3405459	3405649	191	*	3.08	2.52	3.79	-1.26	0.0135	0.0463	Distal Intergenic	22	3336723	3344600	7878	2	102216340	NM_001285535	-60859	ENSDARG00000104717	tbxa2r	thromboxane A2 receptor
chr17	463327	463446	120	*	3.7	3.29	4.28	-0.99	0.0135	0.0463	Promoter (1-2kb)	17	463767	465239	1473	2	553978	NM_001020803	1793	ENSDARG00000099928	chrm5a	cholinergic receptor, muscarinic 5a
chr6	14685244	14685567	324	*	3.2	2.68	3.88	-1.2	0.0135	0.0464	Distal Intergenic	6	14949950	14953354	3405	1	30321	NM_131102	-264383	ENSDARG00000095896	pou3f3b	POU class 3 homeobox 3b
chr20	54792819	54793092	274	*	1.92	1.17	2.78	-1.61	0.0135	0.0464	Distal Intergenic	20	54698535	54744600	46066	1	405898	NM_212962	94284	ENSDARG00000030154	pak7	p21 protein (Cdc42/Rac)-activated kinase 7
chr15	40669702	40669830	129	*	1.99	1.38	2.75	-1.37	0.0135	0.0464	Intron (NM_001077577/569256, intron 1 of 28)	15	40665403	40988693	323291	1	569256	NM_001077577	4299	ENSDARG00000033840	fat3a	FAT atypical cadherin 3a
chr20	7279810	7280002	193	*	1.35	0.59	2.22	-1.62	0.0135	0.0464	Exon (NM_001287083/560091, exon 9 of 16)	20	7263856	7293836	29981	2	560091	NM_001287083	13834	ENSDARG00000039677	dsc2l	desmocollin 2 like
chr12	5742137	5742316	180	*	1.32	0.58	2.18	-1.59	0.0135	0.0464	Distal Intergenic	12	5719616	5728729	9114	2	30581	NM_131318	-13408	ENSDARG00000071560	dlx4b	distal-less homeobox 4b
chr20	10082594	10082896	303	*	1.18	0.33	2.1	-1.77	0.0135	0.0464	Distal Intergenic	20	10099109	10118728	19620	2	30066	NM_130910	35832	ENSDARG00000077840	meis2b	Meis homeobox 2b
chr6	55080427	55080653	227	*	1.98	1.33	2.76	-1.43	0.0135	0.0464	Intron (NM_001100137/321053, intron 11 of 11)	6	55032487	55080761	48275	1	321053	NM_001100137	47940	ENSDARG00000003081	mybphb	myosin binding protein Hb
chr5	67103656	67103945	290	*	2.11	1.45	2.91	-1.46	0.0135	0.0464	Exon (NM_001126403/561959, exon 7 of 17)	5	67079540	67115872	36333	2	561959	NM_001126403	11927	ENSDARG00000044436	rps6ka4	ribosomal protein S6 kinase, polypeptide 4
chr10	762169	762414	246	*	2.41	2.8	0.97	1.83	0.0135	0.0464	Distal Intergenic	10	644571	690170	45600	2	571000	NM_001080607	-71999	ENSDARG00000069726	glis3	GLIS family zinc finger 3
chr22	14428150	14428269	120	*	1.78	0.96	2.68	-1.73	0.0135	0.0464	Distal Intergenic	22	14117091	14126065	8975	1	325226	NM_199708	311059	ENSDARG00000010481	bzw1a	basic leucine zipper and W2 domains 1a
chr15	29467133	29467339	207	*	2.92	3.26	1.85	1.4	0.0135	0.0464	Distal Intergenic	15	29383204	29387466	4263	2	30449	NM_131204	-79667	ENSDARG00000019949	serpinh1b	serpin peptidase inhibitor, clade H (heat shock protein 47), member 1b
chr9	12695645	12695910	266	*	3.08	3.45	1.8	1.65	0.0135	0.0464	Distal Intergenic	9	12655288	12659116	3829	2	449768	NM_001005941	-36529	ENSDARG00000040039	pttg1ipb	PTTG1 interacting protein b
chr12	13809095	13809214	120	*	1.14	0.31	2.04	-1.73	0.0135	0.0464	Distal Intergenic	12	13724549	13729263	4715	2	57930	NM_131502	-79832	ENSDARG00000055630	foxh1	forkhead box H1
chr6	56111531	56111949	419	*	2.69	2.06	3.46	-1.4	0.0135	0.0464	Intron (NM_199742/326100, intron 5 of 8)	6	56076848	56139299	62452	1	326100	NM_199742	34683	ENSDARG00000040607	rtf2	replication termination factor 2
chr19	44821580	44821708	129	*	2.48	1.9	3.21	-1.31	0.0135	0.0464	Distal Intergenic	19	44068414	44089509	21096	2	566831	NM_001045120	-732071	ENSDARG00000035655	rad21b	RAD21 cohesin complex component b
chr17	5101247	5101412	166	*	3.81	3.09	4.65	-1.56	0.0135	0.0464	Exon (NM_201084/394059, exon 15 of 16)	17	5061135	5105925	44791	1	394059	NM_201084	40112	ENSDARG00000043797	cdc5l	CDC5 cell division cycle 5-like (S. pombe)
chr2	18846586	18846705	120	*	1.45	0.65	2.34	-1.69	0.0135	0.0464	Distal Intergenic	2	18703085	18830783	127699	2	58138	NM_131614	-15803	ENSDARG00000100494	pbx1a	pre-B-cell leukemia homeobox 1a
chr17	41523292	41523604	313	*	2.62	2.05	3.34	-1.3	0.0135	0.0464	Distal Intergenic	17	41463942	41466139	2198	1	323882	NM_199658	59350	ENSDARG00000053301	insm1b	insulinoma-associated 1b
chr7	57205683	57206203	521	*	3.75	4.06	2.8	1.27	0.0135	0.0464	Distal Intergenic	7	57109214	57129978	20765	1	558186	NM_001076742	96469	ENSDARG00000038359	enosf1	enolase superfamily member 1
chr4	69691300	69691460	161	*	2.85	3.22	1.54	1.69	0.0135	0.0464	Distal Intergenic	4	67939836	69621459	1681624	2	100141335	NM_001320203	-69841	ENSDARG00000116992	znf1051	zinc finger protein 1051
chr12	32908531	32908651	121	*	3.09	2.36	3.94	-1.58	0.0135	0.0464	Distal Intergenic	12	33297572	33314894	17323	2	550573	NM_001017875	406243	ENSDARG00000088878	c1qtnf1	C1q and TNF related 1
chr24	8498045	8498404	360	*	5.04	4.67	5.57	-0.9	0.0135	0.0464	Distal Intergenic	24	8393290	8412526	19237	2	664769	NM_001039995	-85519	ENSDARG00000045437	slc35b3	solute carrier family 35 member B3
chr1	21724137	21724744	608	*	4.95	5.27	3.97	1.3	0.0135	0.0464	Promoter (1-2kb)	1	21725821	21815554	89734	1	60636	NM_131638	-1077	ENSDARG00000037383	pax5	paired box 5
chr3	37413567	37413769	203	*	2.39	1.8	3.14	-1.33	0.0135	0.0464	Distal Intergenic	3	37558491	37571601	13111	2	399477	NM_201504	157832	ENSDARG00000014763	arf2a	ADP-ribosylation factor 2a
chr25	19913356	19913525	170	*	1.22	0.37	2.15	-1.78	0.0135	0.0464	Distal Intergenic	25	19947298	19948765	1468	1	795490	NM_001130626	-33773	ENSDARG00000046014	kcna6a	potassium voltage-gated channel, shaker-related, subfamily, member 6 a
chr5	60420182	60420398	217	*	1.67	0.88	2.55	-1.67	0.0135	0.0464	Distal Intergenic	5	60519184	60684971	165788	1	564044	NM_001302234	-98786	ENSDARG00000090830	tmem132e	transmembrane protein 132E
chr4	2481864	2482223	360	*	4.57	4.86	3.72	1.14	0.0135	0.0464	Promoter (<=1kb)	4	2482046	2508577	26532	1	100148543	NM_001128382	0	ENSDARG00000070441	zdhhc17	zinc finger DHHC-type containing 17
chr10	22778962	22779374	413	*	4.74	5.01	3.98	1.02	0.0135	0.0464	3' UTR	10	22772147	22779654	7508	1	402969	NM_205670	6815	ENSDARG00000056920	tmem88a	transmembrane protein 88 a
chr17	45870544	45870909	366	*	3.78	3.32	4.41	-1.09	0.0135	0.0464	Distal Intergenic	17	45808153	45808248	96	1	100033770	NR_029933	62391	ENSDARG00000081779	mir203a	microRNA 203a
chr4	12317631	12317941	311	*	3.79	4.3	1.1	3.2	0.0135	0.0464	3' UTR	4	12317461	12323228	5768	2	561494	NM_001100003	5287	ENSDARG00000058244	il17ra1a	interleukin 17 receptor A1a
chr7	39136881	39137011	131	*	3.65	3.19	4.28	-1.08	0.0135	0.0464	Distal Intergenic	7	39166460	39177620	11161	1	30277	NM_131070	-29449	ENSDARG00000036036	mdka	midkine a
chr21	31554715	31555036	322	*	3.3	2.53	4.17	-1.64	0.0135	0.0464	Distal Intergenic	21	31253180	31274479	21300	1	393423	NM_200451	301535	ENSDARG00000033361	asl	argininosuccinate lyase
chr7	35841098	35841287	190	*	2.01	1.37	2.79	-1.42	0.0135	0.0464	Distal Intergenic	7	35706772	35710263	3492	2	573346	NM_001045227	-130835	ENSDARG00000034043	irx5a	iroquois homeobox 5a
chr3	62619185	62619346	162	*	1.1	0.24	2.02	-1.78	0.0135	0.0464	Distal Intergenic	3	62522542	62527667	5126	2	60642	NM_131644	-91518	ENSDARG00000043923	sox9b	SRY-box transcription factor 9b
chr11	44647006	44647594	589	*	5.42	5.66	4.73	0.93	0.0135	0.0464	Promoter (<=1kb)	11	44637516	44647314	9799	2	436971	NM_001002698	0	ENSDARG00000103566	tomm20b	translocase of outer mitochondrial membrane 20b
chr5	8045777	8046060	284	*	1.78	1.05	2.63	-1.59	0.0135	0.0464	Exon (NM_001246284/570900, exon 25 of 46)	5	8006490	8096249	89760	2	570900	NM_001246284	50189	ENSDARG00000098272	nipbla	NIPBL cohesin loading factor a
chr1	4317081	4317200	120	*	3.26	1.93	4.4	-2.47	0.0135	0.0464	Distal Intergenic	1	4101741	4154332	52592	1	324096	NM_001305553	215340	ENSDARG00000098769	slitrk6	SLIT and NTRK-like family, member 6
chr6	1155572	1155939	368	*	3.39	2.89	4.06	-1.17	0.0135	0.0464	Distal Intergenic	6	1161224	1187749	26526	2	352924	NM_183072	31810	ENSDARG00000100374	txnrd3	thioredoxin reductase 3
chr9_KZ115297v1_alt	231609	231728	120	*	3.45	3.05	4.03	-0.99	0.0135	0.0464	Distal Intergenic	416	164615	173809	9195	2	324134	NM_213511	-57800	ENSDARG00000021433	asmtl	acetylserotonin O-methyltransferase-like
chr10	29351138	29351302	165	*	1.49	1.93	-0.29	2.21	0.0135	0.0464	Intron (NM_001012378/497638, intron 1 of 23)	10	29339359	29705347	365989	1	497638	NM_001012378	11779	ENSDARG00000099323	dlg2	discs, large homolog 2 (Drosophila)
chr9	37140838	37141020	183	*	2.82	3.18	1.63	1.55	0.0135	0.0464	Promoter (<=1kb)	9	37141836	37296906	155071	1	30154	NM_130967	-816	ENSDARG00000025641	gli2a	GLI family zinc finger 2a
chr4	12063835	12064009	175	*	1.66	1	2.46	-1.46	0.0135	0.0464	Distal Intergenic	4	12033873	12040345	6473	2	561722	NM_001044967	-23490	ENSDARG00000058366	si:dkey-222f8.3	si:dkey-222f8.3
chr23	43234500	43234628	129	*	4.41	3.96	5.03	-1.07	0.0135	0.0465	Distal Intergenic	23	43255374	43272125	16752	1	447909	NM_001004647	-20746	ENSDARG00000070157	tgm2a	transglutaminase 2, C polypeptide A
chr7	13007870	13007989	120	*	0.89	-0.01	1.84	-1.85	0.0135	0.0465	Distal Intergenic	7	13040639	13326741	286103	1	100334336	NM_001245957	-32650	ENSDARG00000078060	syt7b	synaptotagmin VIIb
chr5	58429319	58429574	256	*	2.43	1.71	3.27	-1.57	0.0135	0.0465	Distal Intergenic	5	58455127	58481929	26803	1	406287	NM_001362422	-25553	ENSDARG00000023394	slc37a2	solute carrier family 37 member 2
chr6	983035	983273	239	*	1.74	1.01	2.58	-1.56	0.0135	0.0465	Distal Intergenic	6	844310	957830	113521	2	564934	NM_001245966	-25205	ENSDARG00000078416	zeb2b	zinc finger E-box binding homeobox 2b
chr1	7331291	7331555	265	*	1.81	1.12	2.63	-1.51	0.0135	0.0465	Distal Intergenic	1	7517463	7539716	22254	1	494154	NM_001009891	-185908	ENSDARG00000013741	lancl1	LanC antibiotic synthetase component C-like 1 (bacterial)
chr13	4847563	4849330	1768	*	7.42	7.65	6.83	0.82	0.0135	0.0465	Promoter (<=1kb)	13	4721646	4848889	127244	2	768182	NM_001077325	0	ENSDARG00000101175	mcu	mitochondrial calcium uniporter
chr25	27134055	27134346	292	*	2.99	2.41	3.72	-1.31	0.0135	0.0465	Intron (NM_001287539/569768, intron 6 of 9)	25	26923193	27236815	313623	1	569768	NM_001287539	210862	ENSDARG00000076508	grm8b	glutamate receptor, metabotropic 8b
chr12	44370673	44370994	322	*	2.05	1.41	2.83	-1.43	0.0135	0.0465	Intron (NM_001110011/572187, intron 43 of 44)	12	44362681	44821797	459117	2	572187	NM_001110011	450803	ENSDARG00000099093	dock1	dedicator of cytokinesis 1
chr6	27284037	27284196	160	*	1.74	1.03	2.57	-1.54	0.0134	0.046	Exon (NM_001110383/559537, exon 7 of 13)	6	27275716	27288989	13274	1	559537	NM_001110383	8321	ENSDARG00000073813	scly	selenocysteine lyase
chr18	38298070	38298246	177	*	1.77	2.18	0.17	2.01	0.0134	0.046	Distal Intergenic	18	38288980	38296665	7686	1	30332	NM_131111	9090	ENSDARG00000095019	lmo2	LIM domain only 2 (rhombotin-like 1)
chr14	45230772	45231014	243	*	2.78	2.11	3.59	-1.48	0.0134	0.046	Distal Intergenic	14	45200278	45206999	6722	2	791180	NM_001080662	-23773	ENSDARG00000075467	shisa3	shisa family member 3
chr10	27995636	27995876	241	*	4.82	4.49	5.31	-0.82	0.0134	0.046	Intron (NM_001020542/553563, intron 16 of 24)	10	27977373	28029016	51644	2	553563	NM_001020542	33140	ENSDARG00000069085	ints2	integrator complex subunit 2
chr15	5172501	5172622	122	*	1.62	0.79	2.53	-1.74	0.0134	0.046	Promoter (<=1kb)	15	5171163	5172110	948	2	100148579	NM_001128383	-391	ENSDARG00000105827	or126-5	odorant receptor, family E, subfamily 126, member 5
chr3	22674043	22674417	375	*	3.68	4.01	2.65	1.36	0.0134	0.046	Distal Intergenic	3	22817156	22829537	12382	2	568765	NM_001128744	155120	ENSDARG00000038176	cyb561	cytochrome b561
chr7	24980702	24981074	373	*	4.11	4.43	3.12	1.3	0.0134	0.046	3' UTR	7	24979833	24994502	14670	2	402934	NM_205638	13428	ENSDARG00000008278	rcor2	REST corepressor 2
chr19	22075106	22075250	145	*	2.1	2.45	0.95	1.5	0.0134	0.046	Distal Intergenic	19	22085925	22177248	91324	1	568160	NM_001045154	-10675	ENSDARG00000062521	atp9b	ATPase phospholipid transporting 9B
chr3	47080685	47080878	194	*	2.1	1.49	2.86	-1.37	0.0134	0.046	Distal Intergenic	3	47114326	47128096	13771	2	393985	NM_201010	47218	ENSDARG00000043105	qtrt1	queuine tRNA-ribosyltransferase 1
chr21	41307489	41307738	250	*	1.89	1.18	2.72	-1.53	0.0134	0.046	Promoter (1-2kb)	21	41256771	41305894	49124	2	324971	NM_200873	-1595	ENSDARG00000102975	nsg2	neuronal vesicle trafficking associated 2
chr19	45461915	45462309	395	*	3.34	3.65	2.36	1.29	0.0134	0.046	Intron (NM_001177934/795613, intron 6 of 7)	19	45375669	45650994	275326	2	795613	NM_001177934	188685	ENSDARG00000104082	trps1	trichorhinophalangeal syndrome I
chr18	49452432	49452597	166	*	1.89	2.31	0.25	2.07	0.0134	0.046	Distal Intergenic	18	49411408	49428855	17448	1	100333421	NM_001365220	41024	ENSDARG00000039500	si:cabz01090165.1	si:cabz01090165.1
chr3	2424264	2424383	120	*	2.16	2.55	0.78	1.77	0.0134	0.046	Distal Intergenic	3	1942219	1943634	1416	1	100073338	NM_001098774	482045	ENSDARG00000076158	zgc:165583	zgc:165583
chrUn_KN149895v1	60068	60190	123	*	2.61	1.98	3.38	-1.41	0.0134	0.046	Distal Intergenic	1149	50918	59774	8857	1	100001225	NM_001171222	9150	NA	st6galnac2	ST6 (alpha-N-acetyl-neuraminyl-2,3-beta-galactosyl-1,3)-N-acetylgalactosaminide alpha-2,6-sialyltransferase 2
chr15	8432624	8432743	120	*	1.73	1.08	2.52	-1.44	0.0134	0.046	Intron (NM_001328383/559419, intron 8 of 11)	15	8425672	8517376	91705	2	559419	NM_001328383	84633	ENSDARG00000015876	npas1	neuronal PAS domain protein 1
chr22	154852	155390	539	*	4.81	5.07	4.1	0.96	0.0134	0.046	Downstream (2-3kb)	22	158112	164919	6808	2	768160	NM_001077303	9529	ENSDARG00000071558	fblim1	filamin binding LIM protein 1
chr13	31068696	31069244	549	*	4.68	4.92	4.04	0.87	0.0134	0.046	Distal Intergenic	13	31147937	31164749	16813	2	562720	NM_001110389	95505	ENSDARG00000031888	mapk8a	mitogen-activated protein kinase 8a
chr2	54002535	54002657	123	*	3.25	2.71	3.96	-1.24	0.0134	0.046	Distal Intergenic	2	53890005	53896300	6296	2	550371	NM_001017676	-106235	ENSDARG00000103521	capsla	calcyphosine-like a
chr2	48874996	48875155	160	*	1.92	2.31	0.53	1.78	0.0134	0.046	Distal Intergenic	2	49007592	49031811	24220	2	436961	NM_001002688	156656	ENSDARG00000012627	cdc34b	cell division cycle 34 homolog (S. cerevisiae) b
chr11	29951171	29951342	172	*	1.66	0.89	2.53	-1.64	0.0134	0.046	Distal Intergenic	11	29936748	29946927	10180	2	553748	NM_001020719	-4244	ENSDARG00000056650	zgc:113276	zgc:113276
chr25	34065670	34065936	267	*	2.67	3.09	1.08	2.01	0.0134	0.046	Distal Intergenic	25	34013331	34027379	14049	1	325557	NM_181761	52339	ENSDARG00000003216	anxa2a	annexin A2a
chr6	32262966	32263322	357	*	3.81	4.14	2.79	1.35	0.0134	0.046	Distal Intergenic	6	32302072	32314913	12842	2	415193	NM_001002103	51591	ENSDARG00000044373	atg4c	autophagy related 4C, cysteine peptidase
chr14	32743359	32743930	572	*	3.86	3.41	4.47	-1.06	0.0134	0.046	Promoter (<=1kb)	14	32742701	32744464	1764	2	30529	NM_001001811	534	ENSDARG00000053569	sox3	SRY-box transcription factor 3
chr13	51516742	51517072	331	*	4.22	3.57	5	-1.43	0.0134	0.046	Exon (NM_131586/58109, exon 4 of 5)	13	51502947	51527140	24194	2	58109	NM_131586	10068	ENSDARG00000021150	valopa	vertebrate ancient long opsin a
chr16	31487246	31487411	166	*	1.45	0.74	2.28	-1.55	0.0134	0.046	Distal Intergenic	16	31511791	31517226	5436	1	393665	NM_200692	-24380	ENSDARG00000010420	ndrg1b	N-myc downstream regulated 1b
chr22	13080193	13080628	436	*	2.95	2.45	3.61	-1.16	0.0134	0.046	Intron (NM_131264/30517, intron 2 of 11)	22	13046270	13164730	118461	2	30517	NM_131264	84102	ENSDARG00000021833	ahr2	aryl hydrocarbon receptor 2
chr2	7886952	7887374	423	*	4.16	4.49	3.13	1.37	0.0134	0.046	Distal Intergenic	2	7818368	7829397	11030	1	541398	NM_001013525	68584	ENSDARG00000006568	kcnmb2	potassium large conductance calcium-activated channel, subfamily M, beta member 2
chr12	31320201	31320563	363	*	4.21	4.48	3.44	1.04	0.0134	0.0461	Intron (NM_001313750/567385, intron 5 of 7)	12	31158690	31422534	263845	2	567385	NM_001313750	101971	ENSDARG00000045065	vti1a	vesicle transport through interaction with t-SNAREs 1A
chr13	30391815	30392049	235	*	1.63	0.97	2.43	-1.46	0.0134	0.0461	Distal Intergenic	13	30506781	30568666	61886	1	561061	NM_001113339	-114732	ENSDARG00000074502	zmiz1a	zinc finger, MIZ-type containing 1a
chr15	23576744	23577069	326	*	2.25	1.6	3.04	-1.45	0.0134	0.0461	Distal Intergenic	15	23511407	23523222	11816	2	338290	NM_001024388	-53522	ENSDARG00000055991	hmbsb	hydroxymethylbilane synthase, b
chr19	11082064	11082371	308	*	4.63	4.89	3.91	0.98	0.0134	0.0461	Intron (NM_001081631/368266, intron 2 of 21)	19	11039512	11106315	66804	2	368266	NM_001081631	23944	ENSDARG00000040380	arhgef1a	Rho guanine nucleotide exchange factor (GEF) 1a
chr11	19527688	19527961	274	*	2.65	2.08	3.38	-1.3	0.0134	0.0461	Distal Intergenic	11	19502367	19511548	9182	1	393261	NM_200291	25321	ENSDARG00000070674	psmd6	proteasome 26S subunit, non-ATPase 6
chr1	38402474	38402811	338	*	2.13	1.43	2.94	-1.51	0.0134	0.0461	Exon (NM_001326541/565975, exon 6 of 7)	1	38398694	38415132	16439	2	565975	NM_001326541	12321	ENSDARG00000012016	hpgd	15-hydroxyprostaglandin dehydrogenase
chr5	5510620	5510778	159	*	2.37	2.74	1.14	1.6	0.0134	0.0461	Distal Intergenic	5	5171255	5243047	71793	2	767667	NM_001076606	-267573	ENSDARG00000091619	mvb12ba	multivesicular body subunit 12Ba
chr12_KZ114926v1_alt	550738	550940	203	*	1.33	1.79	-0.66	2.44	0.0134	0.0461	Intron (NM_212747/100006858, intron 8 of 10)	504	541390	554280	12891	1	100006858	NM_212747	9348	ENSDARG00000045150	csnk1e	casein kinase 1, epsilon
chr14	39411655	39411854	200	*	2.02	1.38	2.8	-1.42	0.0134	0.0461	Distal Intergenic	14	38932445	38946799	14355	2	450083	NM_001006103	-464856	ENSDARG00000036155	gla	galactosidase, alpha
chr4	30040651	30040819	169	*	1.45	1.88	-0.29	2.17	0.0134	0.0461	Distal Intergenic	4	30169227	30174588	5362	2	560232	NM_001123254	133769	ENSDARG00000088870	LOC560232	novel nacht domain containing protein
chr14	46331990	46332297	308	*	2.2	1.54	2.99	-1.44	0.0134	0.0461	Distal Intergenic	14	46342989	46352799	9811	1	327214	NM_213663	-10692	ENSDARG00000041332	tmem33	transmembrane protein 33
chr3	62527511	62527762	252	*	2.92	2.35	3.65	-1.3	0.0134	0.0461	Promoter (<=1kb)	3	62522542	62527667	5126	2	60642	NM_131644	0	ENSDARG00000043923	sox9b	SRY-box transcription factor 9b
chr7	72115933	72116100	168	*	1.69	1.06	2.47	-1.4	0.0134	0.0461	Distal Intergenic	7	72012397	72024114	11718	1	503763	NM_001013341	103536	ENSDARG00000017014	ywhae2	tyrosine 3-monooxygenase/tryptophan 5-monooxygenase activation protein, epsilon polypeptide 2
chr5	71667205	71667551	347	*	2.71	2.24	3.34	-1.1	0.0134	0.0461	Distal Intergenic	5	71699876	71722114	22239	2	445486	NM_001003993	54563	ENSDARG00000001950	ak1	adenylate kinase 1
chr8	7789564	7789851	288	*	3.61	3.92	2.67	1.25	0.0134	0.0461	Intron (NM_131848/114834, intron 2 of 9)	8	7778770	7809445	30676	1	114834	NM_131848	10794	ENSDARG00000098903	tfe3a	transcription factor binding to IGHM enhancer 3a
chr20	13200404	13200833	430	*	3.92	4.21	3.06	1.15	0.0134	0.0461	Distal Intergenic	20	13141414	13174162	32749	1	192314	NM_173241	58990	ENSDARG00000023002	dtl	denticleless E3 ubiquitin protein ligase homolog (Drosophila)
chr19	45994028	45994316	289	*	2.04	1.38	2.83	-1.45	0.0134	0.0461	Exon (NM_001317001/321836, exon 15 of 17)	19	45991058	46017829	26772	2	321836	NM_001317001	23513	ENSDARG00000098916	krit1	KRIT1 ankyrin repeat containing
chr21	33404771	33405018	248	*	2.33	2.69	1.1	1.59	0.0134	0.0461	Exon (NM_001324455/570459, exon 8 of 16)	21	33249478	33447558	198081	1	570459	NM_001324455	155293	ENSDARG00000103606	ndst1b	N-deacetylase/N-sulfotransferase (heparan glucosaminyl) 1b
chr25	6786676	6786842	167	*	1.33	0.52	2.22	-1.7	0.0134	0.0461	Distal Intergenic	25	6451036	6481189	30154	1	100001421	NM_001122855	335640	ENSDARG00000014954	snx33	sorting nexin 33
chr8	18735324	18735512	189	*	2.67	2.1	3.38	-1.28	0.0134	0.0461	Distal Intergenic	8	18650411	18667693	17283	2	406601	NM_213309	-67631	ENSDARG00000043281	stap2b	signal transducing adaptor family member 2b
chr21	41903897	41904209	313	*	1.8	1.02	2.68	-1.66	0.0134	0.0461	Exon (NM_001256250/553402, exon 10 of 10)	21	41903462	42007482	104021	2	553402	NM_001256250	103273	ENSDARG00000053665	gabrg2	gamma-aminobutyric acid (GABA) A receptor, gamma 2
chr9	26460939	26461134	196	*	2.04	2.41	0.78	1.62	0.0134	0.0461	Distal Intergenic	9	26103814	26123706	19893	1	30219	NM_131023	357125	ENSDARG00000020164	efnb2a	ephrin-B2a
chr13	28937880	28938160	281	*	3.16	3.48	2.2	1.28	0.0134	0.0461	Distal Intergenic	13	28903961	28912346	8386	1	569792	NM_001327838	33919	ENSDARG00000098392	ly6pge	lymphocyte antigen 6 family member pge
chr15	19650885	19651268	384	*	2.67	2.07	3.42	-1.35	0.0134	0.0461	Promoter (1-2kb)	15	19652825	19659578	6754	1	436860	NM_001002587	-1557	ENSDARG00000037402	lim2.3	lens intrinsic membrane protein 2.3
chr20	27147582	27147958	377	*	3.3	3.63	2.24	1.4	0.0134	0.0461	Intron (NM_001025551/568372, intron 2 of 9)	20	27114874	27152495	37622	2	568372	NM_001025551	4537	ENSDARG00000003069	btbd7	BTB (POZ) domain containing 7
chr2	9702581	9703077	497	*	4.63	5.07	2.87	2.2	0.0134	0.0461	3' UTR	2	9702055	9744083	42029	2	80972	NM_131757	41006	ENSDARG00000015707	dvl3a	dishevelled segment polarity protein 3a
chr18	49967343	49967522	180	*	3.71	4	2.84	1.17	0.0134	0.0461	Promoter (2-3kb)	18	49969568	50040162	70595	1	724012	NM_001045317	-2046	ENSDARG00000012005	mob2b	MOB kinase activator 2b
chr4	74420243	74420461	219	*	1.47	0.62	2.39	-1.77	0.0134	0.0461	Distal Intergenic	4	74271065	74367912	96848	2	100149130	NM_001316727	-52331	ENSDARG00000076624	ptprb	protein tyrosine phosphatase receptor type b
chr5	50848913	50849103	191	*	3.23	2.6	4	-1.4	0.0134	0.0461	Distal Intergenic	5	50869769	50897883	28115	1	334362	NM_001161511	-20666	ENSDARG00000059711	nol6	nucleolar protein 6 (RNA-associated)
chr17	8570487	8570647	161	*	3.06	3.39	2.02	1.37	0.0134	0.0461	Distal Intergenic	17	8498890	8562543	63654	2	567746	NM_001080601	-7944	ENSDARG00000058692	fzd3b	frizzled class receptor 3b
chr18	10016157	10016396	240	*	3.19	3.54	2.08	1.46	0.0134	0.0461	Distal Intergenic	18	10296228	10298162	1935	2	566572	NM_001100024	281766	ENSDARG00000003020	lrrc4.2	leucine rich repeat containing 4.2
chr15	26520956	26521261	306	*	2.75	2.23	3.44	-1.2	0.0134	0.0461	Intron (NM_199811/327491, intron 12 of 16)	15	26498339	26538989	40651	2	327491	NM_199811	17728	ENSDARG00000003938	rpa1	replication protein A1
chr20	21814334	21814486	153	*	2.65	2.98	1.62	1.36	0.0134	0.0461	Downstream (1-2kb)	20	21638980	21806059	167080	2	559363	NM_001365331	-8275	ENSDARG00000030107	syne2a	spectrin repeat containing, nuclear envelope 2a
chr21	19018099	19018449	351	*	2.87	2.19	3.68	-1.48	0.0134	0.0461	Promoter (<=1kb)	21	19013864	19018455	4592	2	553718	NM_001111214	6	ENSDARG00000021351	nefma	neurofilament, medium polypeptide a
chr17_KZ115521v1_alt	91277	91396	120	*	1.6	0.88	2.43	-1.56	0.0134	0.0461	Distal Intergenic	693	111670	118258	6589	2	394085	NM_201110	26862	ENSDARG00000029107	ube2d1a	ubiquitin-conjugating enzyme E2D 1a
chr22	7681116	7681235	120	*	3.6	3.13	4.23	-1.1	0.0134	0.0461	Distal Intergenic	22	7497340	7508894	11555	1	445056	NM_001003450	183776	ENSDARG00000043168	cela1.5	chymotrypsin like elastase family member 1, tandem duplicate 5
chr23_KZ115665v1_alt	156085	156204	120	*	3.46	2.66	4.34	-1.68	0.0134	0.0461	Promoter (1-2kb)	867	153240	157869	4630	2	797433	NM_200080	1665	ENSDARG00000058358	krt8	keratin 8
chr22	4328167	4328382	216	*	2.71	1.92	3.59	-1.67	0.0134	0.0461	Exon (NM_001082805/556504, exon 19 of 22)	22	4315256	4407871	92616	2	556504	NM_001082805	79489	ENSDARG00000099675	kdm4b	lysine (K)-specific demethylase 4B
chr12	1985396	1985754	359	*	3.04	2.47	3.76	-1.29	0.0134	0.0461	Distal Intergenic	12	1947593	1951233	3641	2	60641	NM_131643	-34163	ENSDARG00000003293	sox9a	SRY-box transcription factor 9a
chr15	2682810	2682930	121	*	1.62	0.65	2.6	-1.95	0.0134	0.0461	Distal Intergenic	15	2655658	2657508	1851	2	81580	NM_131762	-25302	ENSDARG00000069888	cldna	claudin a
chr14	6224684	6224836	153	*	3.1	3.41	2.17	1.24	0.0134	0.0461	Intron (NM_001202495/797948, intron 1 of 10)	14	6209810	6229020	19211	2	797948	NM_001202494	4184	ENSDARG00000079382	hdx	highly divergent homeobox
chr23	1486636	1486842	207	*	2.22	1.64	2.95	-1.31	0.0134	0.0461	Distal Intergenic	23	1561931	1571682	9752	2	393404	NM_200432	84840	ENSDARG00000019311	fbxo30b	F-box protein 30b
chr16	26191152	26191432	281	*	3.38	3.78	1.92	1.86	0.0134	0.0461	Intron (NM_001044848/557983, intron 2 of 30)	16	26143106	26232411	89306	2	557983	NM_001044848	40979	ENSDARG00000055837	arhgef1b	Rho guanine nucleotide exchange factor (GEF) 1b
chr2	47437063	47437408	346	*	4.04	4.35	3.1	1.25	0.0134	0.0461	Distal Intergenic	2	47379266	47431204	51939	2	30532	NM_131277	-5859	ENSDARG00000010192	pax3a	paired box 3a
chr9	14391040	14391163	124	*	2.53	2.91	1.21	1.7	0.0134	0.0461	Intron (NM_212966/405902, intron 10 of 16)	9	14367578	14504834	137257	2	405902	NM_212966	113671	ENSDARG00000038446	nrp2b	neuropilin 2b
chr14	5387837	5388045	209	*	3.11	2.56	3.82	-1.25	0.0134	0.0461	Promoter (1-2kb)	14	5385856	5388924	3069	1	64276	NM_001007134	1981	ENSDARG00000025131	lbx2	ladybird homeobox 2
chr3	1129231	1129495	265	*	4.3	3.54	5.16	-1.62	0.0134	0.0461	Exon (NM_001089466/100037309, exon 19 of 23)	3	1107102	1130892	23791	1	100037309	NM_001089466	22129	ENSDARG00000063438	srebf2	sterol regulatory element binding transcription factor 2
chr1	26573971	26574279	309	*	2.61	2.06	3.31	-1.26	0.0134	0.0461	Distal Intergenic	1	26626831	26654311	27481	1	323538	NM_199643	-52552	ENSDARG00000005210	coro2a	coronin, actin binding protein, 2A
chr1	26411300	26411526	227	*	2.2	1.63	2.93	-1.31	0.0134	0.0461	Distal Intergenic	1	26391755	26398274	6520	2	402961	NM_205662	-13026	ENSDARG00000009685	ppa2	inorganic pyrophosphatase 2
chr24	32877978	32878140	163	*	2.11	2.52	0.62	1.9	0.0134	0.0462	Distal Intergenic	24	32646779	32664669	17891	2	387526	NM_199215	-213309	ENSDARG00000014488	ca2	carbonic anhydrase II
chr20	29422994	29423203	210	*	2.86	3.2	1.79	1.41	0.0134	0.0462	Distal Intergenic	20	29469753	29471619	1867	2	405778	NM_212852	48416	ENSDARG00000029546	grem1a	gremlin 1a, DAN family BMP antagonist
chr17	34016656	34017007	352	*	2.48	1.8	3.29	-1.49	0.0134	0.0462	Intron (NM_001177444/555470, intron 1 of 25)	17	33999630	34182538	182909	1	555470	NM_001177444	17026	ENSDARG00000089076	gphna	gephyrin a
chr3	14038251	14038635	385	*	3.91	4.22	2.95	1.28	0.0134	0.0462	Distal Intergenic	3	14083364	14084989	1626	2	792516	NM_001197065	46354	NA	nfil3-2	nuclear factor, interleukin 3 regulated, member 2
chr10	38465553	38465875	323	*	2.28	1.59	3.09	-1.49	0.0134	0.0462	Distal Intergenic	10	38512267	38521713	9447	1	555328	NM_001110374	-46392	ENSDARG00000075954	serpinh1a	serpin peptidase inhibitor, clade H (heat shock protein 47), member 1a
chr5	29546483	29546606	124	*	1.68	0.91	2.55	-1.64	0.0134	0.0462	Downstream (2-3kb)	5	29548984	29559927	10944	2	393137	NM_200168	13321	ENSDARG00000035505	nelfb	negative elongation factor complex member B
chr14	26967162	26967294	133	*	1.33	0.56	2.2	-1.65	0.0134	0.0462	Distal Intergenic	14	26801995	26830844	28850	1	559349	NM_001110457	165167	ENSDARG00000016531	klhl4	kelch-like family member 4
chr1	2329655	2329886	232	*	2.24	2.61	1	1.61	0.0134	0.0462	Distal Intergenic	1	2260447	2298632	38186	1	569455	NM_001145604	69208	ENSDARG00000040245	kpnb3	karyopherin (importin) beta 3
chr16	4298437	4298614	178	*	1.53	0.77	2.38	-1.61	0.0134	0.0462	Intron (NM_131408/30682, intron 5 of 6)	16	4289048	4317294	28247	2	30682	NM_131408	18680	ENSDARG00000103542	vegfaa	vascular endothelial growth factor Aa
chr16	8770646	8771283	638	*	4.12	3.59	4.81	-1.21	0.0134	0.0462	Distal Intergenic	16	8531417	8663497	132081	2	497312	NM_001289913	-107149	ENSDARG00000091006	cobl	cordon-bleu WH2 repeat protein
chr19	18758136	18758276	141	*	2.57	2.92	1.42	1.49	0.0134	0.0462	Promoter (<=1kb)	19	18758266	18765909	7644	1	324481	NM_212682	0	ENSDARG00000103340	clic1	chloride intracellular channel 1
chr6	13015776	13015961	186	*	1.49	1.91	-0.09	1.99	0.0134	0.0462	Intron (NM_001005992/449819, intron 1 of 11)	6	12996038	13021921	25884	2	449819	NM_001005992	5960	ENSDARG00000058323	tmbim1a	transmembrane BAX inhibitor motif containing 1a
chr13	47800400	47800577	178	*	2.19	2.6	0.7	1.89	0.0134	0.0462	Distal Intergenic	13	47804777	47810107	5331	2	100002901	NM_001098262	9530	ENSDARG00000071168	zmp:0000001138	zmp:0000001138
chr20	854394	854621	228	*	2.26	1.65	3.02	-1.37	0.0134	0.0462	Exon (NM_001044793/555970, exon 25 of 29)	20	851583	894374	42792	2	555970	NM_001044793	39753	ENSDARG00000006332	snx14	sorting nexin 14
chr23	2019618	2020043	426	*	3.63	3.98	2.5	1.48	0.0134	0.0462	Intron (NM_001002301/432371, intron 7 of 15)	23	1927043	2037625	110583	2	432371	NM_001002301	17582	ENSDARG00000006288	prdm5	PR domain containing 5
chr17	51743747	51744126	380	*	5.19	5.46	4.39	1.08	0.0134	0.0462	Promoter (<=1kb)	17	51743921	51757548	13628	1	114426	NM_131801	0	ENSDARG00000007377	odc1	ornithine decarboxylase 1
chr10	12777917	12778048	132	*	2.3	1.64	3.1	-1.46	0.0134	0.0462	Distal Intergenic	10	13000704	13064111	63408	1	368461	NM_001004502	-222656	ENSDARG00000099840	lpar1	lysophosphatidic acid receptor 1
chr6	3553442	3553769	328	*	2.24	1.6	3.03	-1.43	0.0134	0.0462	Distal Intergenic	6	3563890	3573716	9827	2	550288	NM_001017625	19947	ENSDARG00000002510	dmbx1b	diencephalon/mesencephalon homeobox 1b
chr11	18959591	18959906	316	*	3.52	3.86	2.45	1.41	0.0134	0.0462	Intron (NM_001007063/474349, intron 1 of 21)	11	18873113	19085990	212878	1	474349	NM_001007063	86478	ENSDARG00000003169	magi1b	membrane associated guanylate kinase, WW and PDZ domain containing 1b
chr14	7605795	7606012	218	*	1.94	1.26	2.75	-1.49	0.0134	0.0462	Distal Intergenic	14	7697730	7740053	42324	1	337414	NM_212777	-91718	ENSDARG00000025071	brd8	bromodomain containing 8
chr17	51467641	51468128	488	*	2.5	1.85	3.29	-1.44	0.0134	0.0462	Distal Intergenic	17	51627209	51638206	10998	1	503524	NM_001012488	-159081	ENSDARG00000038969	zgc:113142	zgc:113142
chr20	43867575	43867804	230	*	4.12	4.48	2.91	1.57	0.0134	0.0462	Intron (NM_001076575/767634, intron 3 of 17)	20	43794022	43917689	123668	2	767634	NM_001076575	49885	ENSDARG00000026630	mark3b	MAP/microtubule affinity-regulating kinase 3b
chr8	45370361	45370481	121	*	2.08	1.22	3	-1.78	0.0133	0.0457	Intron (NM_213457/406766, intron 4 of 4)	8	45361775	45375108	13334	1	406766	NM_213457	8586	ENSDARG00000007323	chmp4bb	charged multivesicular body protein 4Bb
chr12	29438628	29438983	356	*	2.51	2.94	0.86	2.08	0.0133	0.0457	Distal Intergenic	12	29240119	29271034	30916	1	553241	NM_001111150	198509	ENSDARG00000054154	bms1	BMS1 ribosome biogenesis factor
chr10	12892100	12892323	224	*	2.62	3	1.28	1.73	0.0133	0.0457	Distal Intergenic	10	13000704	13064111	63408	1	368461	NM_001004502	-108381	ENSDARG00000099840	lpar1	lysophosphatidic acid receptor 1
chr11	3811487	3811888	402	*	2.54	1.91	3.32	-1.4	0.0133	0.0457	Distal Intergenic	11	3847883	3860534	12652	2	30480	NM_131233	48646	ENSDARG00000059327	gata2a	GATA binding protein 2a
chr7	73922092	73922522	431	*	4.13	4.48	2.94	1.54	0.0133	0.0457	Distal Intergenic	7	73847692	73848458	767	2	100037379	NM_001089531	-73634	ENSDARG00000075538	zgc:163061	zgc:163061
chr5	15374424	15374537	114	*	1.38	0.67	2.22	-1.54	0.0133	0.0457	Distal Intergenic	5	15350954	15357817	6864	1	406627	NM_213323	23470	ENSDARG00000042069	pebp1	phosphatidylethanolamine binding protein 1
chr16	37262787	37263073	287	*	3.03	3.42	1.58	1.85	0.0133	0.0457	Distal Intergenic	16	36974523	36979598	5076	2	325757	NM_001115142	-283189	ENSDARG00000039989	snrnp48	small nuclear ribonucleoprotein 48 (U11/U12)
chr10	7777615	7777863	249	*	2.09	2.5	0.62	1.88	0.0133	0.0457	Downstream (1-2kb)	10	7778873	7785954	7082	2	337514	NM_212779	8091	ENSDARG00000019521	mpx	myeloid-specific peroxidase
chr12	48288723	48288842	120	*	2.31	1.58	3.16	-1.58	0.0133	0.0457	Distal Intergenic	12	48307111	48318987	11877	2	550273	NM_001017610	30145	ENSDARG00000077760	ascc1	activating signal cointegrator 1 complex subunit 1
chr2	57228133	57228354	222	*	4.61	4.86	3.96	0.9	0.0133	0.0457	Distal Intergenic	2	57239981	57264312	24332	2	337133	NM_212769	35958	ENSDARG00000061774	mbd3a	methyl-CpG binding domain protein 3a
chr16	51935561	51935728	168	*	2.93	2.18	3.79	-1.61	0.0133	0.0457	Distal Intergenic	16	51950504	51966836	16333	2	323645	NM_199647	31108	ENSDARG00000009480	pdcl	phosducin-like
chr8	49154860	49155513	654	*	4.02	3.49	4.72	-1.23	0.0133	0.0457	Distal Intergenic	8	49169768	49172500	2733	2	335335	NM_001328560	16987	ENSDARG00000022684	fkbp1aa	FKBP prolyl isomerase 1Aa
chr14	9618082	9618326	245	*	3.17	3.48	2.22	1.27	0.0133	0.0457	Distal Intergenic	14	9581896	9588317	6422	1	406756	NM_213447	36186	ENSDARG00000075346	tmem129	transmembrane protein 129, E3 ubiquitin protein ligase
chr23	109858	110078	221	*	3.37	2.86	4.04	-1.18	0.0133	0.0457	Distal Intergenic	23	2669	9338	6670	1	30176	NM_130985	107189	ENSDARG00000019646	twist3	twist3
chr5	63304922	63305172	251	*	4.32	4.62	3.39	1.24	0.0133	0.0457	Promoter (2-3kb)	5	63294865	63302916	8052	2	336623	NM_001089344	-2006	ENSDARG00000045262	gsnb	gelsolin b
chr23_KZ115673v1_alt	130722	130929	208	*	1.59	1.98	0.18	1.8	0.0133	0.0457	Distal Intergenic	875	212734	236592	23859	2	450084	NM_001006104	105663	ENSDARG00000037706	gss	glutathione synthetase
chr12_KZ115384v1_alt	559247	559372	126	*	1.68	0.92	2.54	-1.62	0.0133	0.0457	Distal Intergenic	526	467077	499544	32468	1	30700	NM_131425	92170	ENSDARG00000018303	etv4	ETS variant transcription factor 4
chr20	44268022	44268163	142	*	1.23	0.32	2.17	-1.85	0.0133	0.0457	Intron (NM_001316947/100002138, intron 1 of 3)	20	44250691	44287488	36798	1	100002138	NM_001316947	17331	ENSDARG00000086186	opn8a	opsin 8, group member a
chr21	12702710	12703120	411	*	3	2.52	3.64	-1.12	0.0133	0.0457	Distal Intergenic	21	13066708	13085239	18532	2	619266	NM_001033747	382119	ENSDARG00000012126	zgc:109965	zgc:109965
chr19	4155307	4155468	162	*	2.12	2.51	0.73	1.78	0.0133	0.0457	Distal Intergenic	19	4126905	4137087	10183	2	100000325	NM_001100068	-18220	ENSDARG00000099049	rragcb	Ras-related GTP binding Cb
chr12	2990216	2990413	198	*	3.29	3.58	2.42	1.16	0.0133	0.0457	Distal Intergenic	12	3022872	3042029	19158	1	795167	NM_001320406	-32459	ENSDARG00000020795	rac3b	Rac family small GTPase 3b
chr3	4497125	4497382	258	*	2.49	2.93	0.69	2.24	0.0133	0.0457	Intron (NM_001089332/100003994, intron 1 of 22)	3	4458390	4501026	42637	2	100003994	NM_001089332	3644	ENSDARG00000098540	zc3h7ba	zinc finger CCCH-type containing 7Ba
chr5	17499929	17500050	122	*	4.26	3.89	4.8	-0.92	0.0133	0.0457	Distal Intergenic	5	17780475	17813299	32825	1	564271	NM_001100015	-280425	ENSDARG00000075347	chfr	checkpoint with forkhead and ring finger domains, E3 ubiquitin protein ligase
chr20	33745302	33745512	211	*	3.88	3.12	4.75	-1.63	0.0133	0.0457	Promoter (1-2kb)	20	33744083	33749174	5092	1	550540	NM_001017842	1219	ENSDARG00000018871	henmt1	HEN methyltransferase 1
chr17	1417265	1417434	170	*	3.21	3.51	2.31	1.2	0.0133	0.0457	Distal Intergenic	17	1453308	1533170	79863	1	101910198	NM_001281801	-35874	NA	akt1	v-akt murine thymoma viral oncogene homolog 1
chr11	24476270	24476671	402	*	2.22	1.52	3.05	-1.52	0.0133	0.0457	Distal Intergenic	11	24429923	24458778	28856	2	562784	NM_001080582	-17492	ENSDARG00000062222	mxra8a	matrix-remodelling associated 8a
chr10	44958499	44958693	195	*	2.9	2.29	3.67	-1.38	0.0133	0.0457	Promoter (1-2kb)	10	44956660	44963775	7116	1	405770	NM_212844	1839	ENSDARG00000098700	il1b	interleukin 1, beta
chr3	62424194	62424557	364	*	3.75	4.1	2.63	1.47	0.0133	0.0457	Distal Intergenic	3	62432917	62488805	55889	1	110366352	NR_147694	-8360	NA	LOC110366352	uncharacterized LOC110366352
chr14_KZ115444v1_alt	118206	118441	236	*	2.44	1.9	3.14	-1.24	0.0133	0.0458	Distal Intergenic	601	170926	256090	85165	1	566632	NM_001039461	-52485	ENSDARG00000103953	med12	mediator complex subunit 12
chr19	43098027	43098361	335	*	4.52	4.82	3.63	1.19	0.0133	0.0458	Distal Intergenic	19	43119014	43122337	3324	1	30516	NM_131263	-20653	ENSDARG00000020850	eef1a1l1	eukaryotic translation elongation factor 1 alpha 1, like 1
chr12	37298307	37298838	532	*	5.89	6.13	5.23	0.9	0.0133	0.0458	Promoter (<=1kb)	12	37275333	37299671	24339	2	678607	NM_001040355	833	ENSDARG00000060457	pmp22b	peripheral myelin protein 22b
chr20	44640629	44640928	300	*	2.83	2.11	3.67	-1.56	0.0133	0.0458	Intron (NM_001365966/100331225, intron 19 of 27)	20	44582291	44796770	214480	1	100331225	NM_001365966	58338	ENSDARG00000060537	atad2b	ATPase family AAA domain containing 2B
chr24	16873896	16874109	214	*	1.81	1.16	2.59	-1.43	0.0133	0.0458	Distal Intergenic	24	16905218	16912893	7676	1	322258	NM_212613	-31109	ENSDARG00000045399	cct5	chaperonin containing TCP1, subunit 5 (epsilon)
chr4	2905908	2906210	303	*	2.14	1.53	2.9	-1.37	0.0133	0.0458	Distal Intergenic	4	2927270	2945327	18058	2	406815	NM_213494	39117	ENSDARG00000006038	aebp2	AE binding protein 2
chr8	11074833	11075431	599	*	3.08	2.59	3.73	-1.14	0.0133	0.0458	Distal Intergenic	8	11080571	11111930	31360	2	393867	NM_200893	36499	ENSDARG00000033832	ampd1	adenosine monophosphate deaminase 1 (isoform M)
chr7	72246332	72246736	405	*	3.66	4.03	2.4	1.62	0.0133	0.0458	Distal Intergenic	7	72276507	72290606	14100	1	336876	NM_001328590	-29771	ENSDARG00000098486	tollip	toll interacting protein
chr4	18932008	18932469	462	*	4.14	4.46	3.15	1.31	0.0133	0.0458	Intron (NM_199533/321107, intron 1 of 7)	4	18853462	18939338	85877	2	321107	NM_199533	6869	ENSDARG00000008867	rap1b	RAP1B, member of RAS oncogene family
chr23	25476328	25476538	211	*	3.91	3.3	4.67	-1.37	0.0133	0.0458	Distal Intergenic	23	25354856	25448872	94017	1	407694	NM_001346154	121472	ENSDARG00000004372	fmnl3	formin-like 3
chr23	41089914	41090232	319	*	3.67	4.05	2.36	1.7	0.0133	0.0458	Distal Intergenic	23	40872691	40895168	22478	2	402976	NM_001139458	-194746	ENSDARG00000041644	si:dkey-194e6.1	si:dkey-194e6.1
chr11	7664108	7664235	128	*	4.52	4.16	5.06	-0.9	0.0133	0.0458	Distal Intergenic	11	7383213	7410314	27102	2	406676	NM_213367	-253794	ENSDARG00000013653	adgrl4	adhesion G protein-coupled receptor L4
chr21	25426939	25427059	121	*	3.38	2.02	4.53	-2.51	0.0133	0.0458	Distal Intergenic	21	25399162	25416391	17230	2	80872	NM_131756	-10548	ENSDARG00000008155	sms	spermine synthase
chr5	42891688	42891925	238	*	2.59	3.01	1	2	0.0133	0.0458	Distal Intergenic	5	42897741	42901806	4066	1	100002312	NM_001113644	-5816	ENSDARG00000092918	crhr2	corticotropin releasing hormone receptor 2
chr5	37793157	37793295	139	*	2.25	1.58	3.05	-1.47	0.0133	0.0458	Intron (NM_001100031/567536, intron 1 of 31)	5	37785271	37817095	31825	1	567536	NM_001100031	7886	ENSDARG00000020924	myo1ca	myosin Ic, paralog a
chr9	11168234	11168363	130	*	2.23	1.47	3.08	-1.61	0.0133	0.0458	Intron (NM_214787/407668, intron 1 of 9)	9	11034967	11228363	193397	1	407668	NM_214787	133267	ENSDARG00000025162	asic4a	acid-sensing (proton-gated) ion channel family member 4a
chr8	22435344	22435662	319	*	3.17	3.56	1.73	1.83	0.0133	0.0458	Intron (NM_001045372/791704, intron 1 of 8)	8	22368591	22477337	108747	1	791704	NM_001045372	66753	ENSDARG00000068969	zgc:153759	zgc:153759
chr6	55496998	55497139	142	*	1.59	0.9	2.41	-1.51	0.0133	0.0458	Distal Intergenic	6	55428924	55437087	8164	1	447849	NM_001004588	68074	ENSDARG00000016345	ncoa5	nuclear receptor coactivator 5
chr21	21232451	21232757	307	*	3.51	3.89	2.2	1.69	0.0133	0.0458	Distal Intergenic	21	21244070	21260763	16694	1	565104	NM_001113732	-11313	ENSDARG00000039863	lifrb	LIF receptor subunit alpha b
chr6	44550523	44550649	127	*	1.23	0.4	2.14	-1.74	0.0133	0.0458	Distal Intergenic	6	44245372	44401982	156611	2	100005518	NM_001256392	-148541	ENSDARG00000073869	pdzrn3b	PDZ domain containing RING finger 3b
chr13	42675791	42675921	131	*	2.96	3.3	1.89	1.41	0.0133	0.0458	Promoter (<=1kb)	13	42676213	42679042	2830	1	394122	NM_201147	-292	ENSDARG00000068886	mrpl14	mitochondrial ribosomal protein L14
chr16	24211296	24211433	138	*	0.99	0.07	1.94	-1.87	0.0133	0.0458	Downstream (2-3kb)	16	24190033	24194585	4553	2	393723	NM_200750	-16711	ENSDARG00000030602	rps19	ribosomal protein S19
chr8	41980609	41980977	369	*	2.12	1.51	2.89	-1.38	0.0133	0.0458	Distal Intergenic	8	42059495	42238543	179049	2	405794	NM_001017996	257566	ENSDARG00000042723	gfra2a	GDNF family receptor alpha 2a
chr2	45694722	45694905	184	*	2.5	2.84	1.36	1.49	0.0133	0.0458	Distal Intergenic	2	45665493	45691072	25580	2	724011	NM_001045316	-3650	ENSDARG00000053104	fam102ba	family with sequence similarity 102 member Ba
chr12	4817758	4817878	121	*	3.61	2.28	4.75	-2.47	0.0133	0.0458	Distal Intergenic	12	4845448	4854555	9108	1	100002189	NM_001113503	-27570	ENSDARG00000099218	ghrhr2	growth hormone releasing hormone receptor 2
chr12	42367240	42367363	124	*	3.95	3.47	4.6	-1.14	0.0133	0.0458	Promoter (<=1kb)	12	42364157	42366520	2364	2	556628	NM_001034970	-720	ENSDARG00000099060	zgc:111868	zgc:111868
chr16	40041064	40041448	385	*	3.86	3.11	4.71	-1.6	0.0133	0.0458	Promoter (1-2kb)	16	40043445	40074145	30701	1	393185	NM_200216	-1997	ENSDARG00000040033	trmt11	tRNA methyltransferase 11 homolog
chr2	8509797	8510227	431	*	4.35	4.79	2.55	2.24	0.0133	0.0458	Distal Intergenic	2	8586953	8611675	24723	2	100149582	NM_001128395	101448	ENSDARG00000058638	si:ch211-71m22.1	si:ch211-71m22.1
chr15	14502172	14502305	134	*	1.13	1.57	-0.66	2.22	0.0133	0.0458	Intron (NM_001012375/497616, intron 1 of 8)	15	14436159	14552101	115943	2	497616	NM_001012375	49796	ENSDARG00000101949	numbl	NUMB like endocytic adaptor protein
chr11	42874777	42874899	123	*	1.46	0.63	2.37	-1.75	0.0133	0.0458	Distal Intergenic	11	42914772	42918940	4169	2	100007362	NM_001351717	44041	ENSDARG00000036424	pcdh20	protocadherin 20
chr11	24994562	24994703	142	*	1.13	1.57	-0.66	2.22	0.0133	0.0458	Promoter (<=1kb)	11	24994792	25041804	47013	1	492329	NM_001007295	-89	ENSDARG00000044874	zgc:92107	zgc:92107
chr15	47725619	47725809	191	*	1.07	0.19	2	-1.81	0.0133	0.0458	Distal Intergenic	15	47746176	47774712	28537	1	402943	NM_205646	-20367	ENSDARG00000097718	stard10	StAR-related lipid transfer (START) domain containing 10
chr25	3830214	3830447	234	*	4.01	4.3	3.18	1.12	0.0133	0.0458	Promoter (<=1kb)	25	3809733	3830272	20540	2	450020	NM_001006041	0	ENSDARG00000038288	cd151	CD151 molecule
chr21	23046407	23046701	295	*	3.68	3.99	2.73	1.26	0.0133	0.0458	Promoter (<=1kb)	21	23036294	23046562	10269	2	393110	NM_200141	0	ENSDARG00000018738	zw10	zw10 kinetochore protein
chr13	51695242	51695486	245	*	3.24	3.55	2.29	1.26	0.0133	0.0458	Distal Intergenic	13	51579600	51583430	3831	1	565782	NM_001135784	115642	ENSDARG00000104735	nkx6.2	NK6 homeobox 2
chr18	7177990	7178201	212	*	1.63	0.87	2.49	-1.62	0.0133	0.0458	Exon (NM_001281989/570643, exon 21 of 51)	18	7150144	7228004	77861	1	570643	NM_001281989	27846	ENSDARG00000077231	vwf	von Willebrand factor
chr5	2364539	2364873	335	*	3.22	3.56	2.12	1.44	0.0133	0.0459	Distal Intergenic	5	2241327	2282256	40930	2	555196	NM_001114407	-82283	ENSDARG00000043589	ca4a	carbonic anhydrase IV a
chr8	53925988	53926294	307	*	3.9	4.19	3.07	1.12	0.0133	0.0459	Promoter (<=1kb)	8	53918234	53926228	7995	2	558410	NM_001199726	0	ENSDARG00000013009	ubiad1	UbiA prenyltransferase domain containing 1
chr9	873681	873886	206	*	2.48	2.87	1.08	1.79	0.0133	0.0459	Distal Intergenic	9	900395	904227	3833	2	447937	NM_001004675	30341	ENSDARG00000037199	zgc:101851	zgc:101851
chr12	15079805	15079928	124	*	2.43	1.64	3.32	-1.68	0.0133	0.0459	Distal Intergenic	12	15148625	15196223	47599	1	445059	NM_001003453	-68697	ENSDARG00000040712	adprh	ADP-ribosylarginine hydrolase
chr10	42636545	42636733	189	*	0.94	0.07	1.87	-1.8	0.0133	0.0459	Intron (NM_001161732/567905, intron 6 of 17)	10	42589707	42661445	71739	1	567905	NM_001161732	46838	ENSDARG00000011190	fgfr1b	fibroblast growth factor receptor 1b
chr8	387084	387376	293	*	4.48	4.77	3.64	1.13	0.0133	0.0459	Promoter (<=1kb)	8	387622	389612	1991	1	393566	NM_200594	-246	ENSDARG00000046024	pym1	PYM homolog 1, exon junction complex associated factor
chr15	35580530	35580834	305	*	2	1.33	2.8	-1.47	0.0133	0.0459	Distal Intergenic	15	35253371	35345468	92098	1	567225	NM_001080189	327159	ENSDARG00000005216	zgc:158328	zgc:158328
chr25	260909	261052	144	*	2.42	2.78	1.18	1.61	0.0133	0.0459	3' UTR	25	245065	261513	16449	1	447865	NM_001004604	15844	ENSDARG00000073905	vwa5a	von Willebrand factor A domain containing 5A
chr1	52204822	52204947	126	*	3.05	2.59	3.67	-1.08	0.0133	0.0459	Intron (NM_001089414/567338, intron 3 of 3)	1	52203015	52210546	7532	2	567338	NM_001089414	5599	ENSDARG00000059951	pld6	phospholipase D family, member 6
chr23	5674220	5675063	844	*	4	3.34	4.79	-1.45	0.0133	0.0459	Exon (NM_152893/58071, exon 5 of 15)	23	5653232	5685045	31814	2	58071	NM_152893	9982	ENSDARG00000020610	tnnt2a	troponin T type 2a (cardiac)
chr20	39673652	39674191	540	*	4.54	4.84	3.64	1.2	0.0133	0.0459	Distal Intergenic	20	39685572	39689790	4219	1	554129	NM_001045231	-11381	ENSDARG00000034957	hddc2	HD domain containing 2
chr14	4293359	4293492	134	*	2.07	1.41	2.87	-1.45	0.0133	0.0459	Distal Intergenic	14	4151379	4161766	10388	1	402945	NM_205648	141980	ENSDARG00000098746	dhrs13l1	dehydrogenase/reductase (SDR family) member 13 like 1
chr2	3958714	3958918	205	*	1.29	0.47	2.19	-1.72	0.0133	0.0459	Distal Intergenic	2	3986083	4009200	23118	1	556167	NM_001114409	-27165	ENSDARG00000114182	mkxb	mohawk homeobox b
chr6	30543889	30544008	120	*	2	2.37	0.73	1.64	0.0133	0.0459	Intron (NM_001110470/566492, intron 5 of 22)	6	30491129	30592947	101819	1	566492	NM_001110470	52760	ENSDARG00000061654	wwc3	WWC family member 3
chr6	56703185	56703372	188	*	2.11	1.49	2.87	-1.38	0.0133	0.0459	Distal Intergenic	6	56147847	56179707	31861	1	494033	NM_001008576	555338	ENSDARG00000040606	tfap2c	transcription factor AP-2 gamma (activating enhancer binding protein 2 gamma)
chr10	14000054	14000582	529	*	4.4	4.76	3.21	1.55	0.0133	0.0459	Distal Intergenic	10	13460130	13772847	312718	2	368438	NM_001098242	-227207	ENSDARG00000028661	cntfr	ciliary neurotrophic factor receptor
chr18	20402995	20403300	306	*	4.08	4.43	2.96	1.47	0.0133	0.0459	Distal Intergenic	18	20436293	20458337	22045	2	30627	NM_131355	55037	ENSDARG00000014943	kif23	kinesin family member 23
chr1	51655689	51656025	337	*	2.87	3.23	1.67	1.57	0.0133	0.0459	Distal Intergenic	1	51673028	51684941	11914	2	798080	NM_001173406	28916	ENSDARG00000074182	prokr1a	prokineticin receptor 1a
chr16	29140506	29140662	157	*	1.9	1.15	2.75	-1.6	0.0133	0.0459	Intron (NM_131317/30580, intron 1 of 9)	16	29076241	29146624	70384	2	30580	NM_131317	5962	ENSDARG00000040237	mef2d	myocyte enhancer factor 2d
chr13	24825709	24826576	868	*	5.84	6.1	5.11	0.99	0.0133	0.0459	Promoter (<=1kb)	13	24781188	24825691	44504	2	568838	NM_001145601	-18	ENSDARG00000061525	slka	STE20-like kinase a
chr10	17267744	17268439	696	*	4.06	4.36	3.17	1.19	0.0133	0.0459	Distal Intergenic	10	17223686	17232372	8687	2	780839	NM_001079660	-35372	ENSDARG00000014058	rab36	RAB36, member RAS oncogene family
chr3	13595112	13595284	173	*	4.2	3.45	5.05	-1.61	0.0133	0.0459	Exon (NM_001013505/541378, exon 5 of 10)	3	13582019	13599471	17453	2	541378	NM_001013505	4187	ENSDARG00000104173	tufm	Tu translation elongation factor, mitochondrial
chr1	50985990	50986192	203	*	3.09	3.43	1.97	1.46	0.0133	0.0459	Exon (NM_001309523/399662, exon 6 of 9)	1	50968908	50990889	21982	1	399662	NM_001309523	17082	ENSDARG00000017772	mdh1aa	malate dehydrogenase 1Aa, NAD (soluble)
chr24	35390417	35390789	373	*	3.88	4.19	2.93	1.26	0.0133	0.0459	Promoter (2-3kb)	24	35387517	35393533	6017	1	494038	NM_001008581	2900	ENSDARG00000040046	snai2	snail family zinc finger 2
chr2	24397810	24398281	472	*	3.52	3.02	4.19	-1.16	0.0133	0.0459	Exon (NM_001080004/563016, exon 2 of 8)	2	24386454	24402342	15889	2	563016	NM_001080004	4061	ENSDARG00000061797	zgc:154006	zgc:154006
chr6	58481907	58482140	234	*	2.27	2.64	1.01	1.63	0.0133	0.0459	Distal Intergenic	6	58522738	58528831	6094	1	503602	NM_001013289	-40598	ENSDARG00000057857	arfrp1	ADP-ribosylation factor related protein 1
chr17	40318851	40319179	329	*	2.65	3.01	1.39	1.63	0.0133	0.0459	Distal Intergenic	17	39785815	39785912	98	1	100885856	NR_048926	533036	ENSDARG00000111809	mir2185-3	microRNA mir-2185-3
chr6	59879534	59879768	235	*	3.99	3.22	4.85	-1.64	0.0133	0.0459	Exon (NM_001080193/569207, exon 15 of 29)	6	59854224	59895080	40857	1	569207	NM_001080193	25310	ENSDARG00000059794	kdm6al	lysine (K)-specific demethylase 6A, like
chr5	3927886	3928120	235	*	3.39	3.7	2.43	1.27	0.0133	0.0459	Promoter (<=1kb)	5	3927989	3937714	9726	1	393243	NM_200273	0	ENSDARG00000023950	znhit3	zinc finger, HIT-type containing 3
chr23	37811584	37811866	283	*	2.04	1.32	2.88	-1.56	0.0133	0.0459	Distal Intergenic	23	37815650	37816968	1319	1	140746	NM_131881	-3784	ENSDARG00000002601	irx7	iroquois homeobox 7
chr7	395631	395761	131	*	1.92	1.25	2.72	-1.47	0.0133	0.0459	Distal Intergenic	7	427503	624158	196656	1	560420	NM_001079984	-31742	NA	nrxn2b	neurexin 2b
chr22_KZ115644v1_alt	126187	126306	120	*	1.61	0.8	2.49	-1.69	0.0133	0.0459	Distal Intergenic	841	39252	91445	52194	2	560942	NM_001044943	-34742	ENSDARG00000100506	crb1	crumbs cell polarity complex component 1
chr16	40043564	40043826	263	*	4.28	4.59	3.33	1.25	0.0133	0.0459	Promoter (<=1kb)	16	40043445	40074145	30701	1	393185	NM_200216	119	ENSDARG00000040033	trmt11	tRNA methyltransferase 11 homolog
chr17	5162059	5162405	347	*	2.1	1.47	2.88	-1.41	0.0133	0.0459	3' UTR	17	5161760	5424175	262416	2	436898	NM_001002625	261770	ENSDARG00000098141	supt3h	SPT3 homolog, SAGA and STAGA complex component
chr21	19110706	19110860	155	*	1.56	0.77	2.44	-1.67	0.0133	0.0459	Distal Intergenic	21	19070921	19073831	2911	1	436748	NM_001002475	39785	ENSDARG00000022569	nkx6.1	NK6 homeobox 1
chr16	31701631	31701750	120	*	2.5	1.64	3.41	-1.77	0.0133	0.0459	Distal Intergenic	16	31676998	31686161	9164	2	793529	NR_027750	-15470	ENSDARG00000100599	c1s	complement component 1, s subcomponent
chr19	11271262	11271568	307	*	4.15	3.58	4.88	-1.3	0.0133	0.046	3' UTR	19	11271058	11315215	44158	2	402965	NM_205759	43647	ENSDARG00000071116	eepd1	endonuclease/exonuclease/phosphatase family domain containing 1
chr18_KZ114964v1_alt	230454	230578	125	*	0.63	-0.32	1.6	-1.93	0.0133	0.046	Distal Intergenic	716	36249	47575	11327	1	436877	NM_001002604	194205	ENSDARG00000041155	morf4l1	mortality factor 4 like 1
chr18	48887792	48888213	422	*	4.09	4.38	3.25	1.12	0.0133	0.046	Intron (NM_001080167/562516, intron 1 of 12)	18	48863486	48936000	72515	1	562516	NM_001080167	24306	ENSDARG00000078458	ppp1r37	protein phosphatase 1, regulatory subunit 37
chr19	34950736	34951081	346	*	3.3	3.62	2.32	1.3	0.0132	0.0455	Promoter (<=1kb)	19	34950200	34958185	7986	1	560713	NM_001166230	536	ENSDARG00000054331	ccn4a	cellular communication network factor 4a
chr1	6483563	6483739	177	*	1.85	1.2	2.64	-1.44	0.0132	0.0455	Intron (NM_001020643/553670, intron 1 of 3)	1	6403558	6494384	90827	2	553670	NM_001020643	10645	ENSDARG00000073857	klf7a	Kruppel-like factor 7a
chr13	45140094	45140548	455	*	3.37	3.7	2.34	1.36	0.0132	0.0455	Intron (NM_131604/58127, intron 3 of 5)	13	45092766	45200543	107778	2	58127	NM_001362344	59995	ENSDARG00000052826	runx3	RUNX family transcription factor 3
chr12	4567351	4567852	502	*	5.76	6.02	5.06	0.96	0.0132	0.0455	Distal Intergenic	12	4580372	4593610	13239	2	564854	NM_001143904	25758	ENSDARG00000076251	irf3	interferon regulatory factor 3
chr10	44718055	44718255	201	*	2.75	2.25	3.41	-1.16	0.0132	0.0455	Exon (NM_198921/387260, exon 6 of 12)	10	44699734	44746527	46794	1	387260	NM_198921	18321	ENSDARG00000101557	scarb1	scavenger receptor class B, member 1
chr5	7912001	7912134	134	*	1.53	1.94	-0.06	2	0.0132	0.0455	Distal Intergenic	5	7853463	7897316	43854	2	563080	NM_001258223	-14685	ENSDARG00000103259	opn4xb	opsin 4xb
chr10	6704031	6704156	126	*	1.83	1.13	2.65	-1.52	0.0132	0.0455	Distal Intergenic	10	6765109	6775203	10095	2	570279	NM_001128757	71047	ENSDARG00000093498	zgc:194281	zgc:194281
chr4_KZ115085v1_alt	115584	115953	370	*	4.45	4.77	3.48	1.29	0.0132	0.0455	Distal Intergenic	142	214596	232971	18376	2	406575	NM_213286	117018	ENSDARG00000006029	lta4h	leukotriene A4 hydrolase
chr13	50303466	50303777	312	*	2.71	3.09	1.42	1.66	0.0132	0.0455	Intron (NM_001365297/571695, intron 2 of 20)	13	50257201	50321910	64710	2	571695	NM_001365297	18133	NA	mypn	myopalladin
chr17	35970061	35970166	106	*	0.62	-0.32	1.58	-1.91	0.0132	0.0455	Distal Intergenic	17	35878547	35881807	3261	2	30602	NM_131336	-88254	ENSDARG00000077811	sox11a	SRY-box transcription factor 11a
chr1	6459829	6459962	134	*	6.18	5.91	6.61	-0.7	0.0132	0.0455	Intron (NM_001020643/553670, intron 1 of 3)	1	6403558	6494384	90827	2	553670	NM_001020643	34422	ENSDARG00000073857	klf7a	Kruppel-like factor 7a
chr5	20215542	20215790	249	*	3.82	4.14	2.84	1.3	0.0132	0.0455	Distal Intergenic	5	20197138	20205072	7935	2	402994	NM_205694	-10470	ENSDARG00000035601	dao.3	D-amino-acid oxidase, tandem duplicate 3
chr24	14390177	14390868	692	*	5.09	5.43	4.02	1.41	0.0132	0.0455	Intron (NM_131777/81884, intron 11 of 21)	24	14240202	14442000	201799	1	81884	NM_131777	149975	ENSDARG00000017929	ncoa2	nuclear receptor coactivator 2
chr19	45744429	45744744	316	*	7.55	7.29	7.97	-0.68	0.0132	0.0455	Distal Intergenic	19	45375669	45650994	275326	2	795613	NM_001177934	-93435	ENSDARG00000104082	trps1	trichorhinophalangeal syndrome I
chr2	28528434	28528609	176	*	1.97	1.36	2.72	-1.35	0.0132	0.0455	Distal Intergenic	2	28649736	28671144	21409	2	378446	NM_201330	142535	ENSDARG00000103226	dhcr7	7-dehydrocholesterol reductase
chr12	42869664	42869847	184	*	0.62	-0.32	1.59	-1.92	0.0132	0.0455	Distal Intergenic	12	42436440	42577512	141073	1	567751	NM_001080602	433224	ENSDARG00000100244	ebf3a	EBF transcription factor 3a
chr16	23588982	23589101	120	*	0.62	-0.32	1.59	-1.92	0.0132	0.0455	Distal Intergenic	16	23531583	23559531	27949	1	58119	NM_131596	57399	ENSDARG00000012389	adar	adenosine deaminase RNA specific
chr4	25099394	25099503	110	*	0.62	-0.32	1.59	-1.92	0.0132	0.0455	Intron (NM_001042744/334474, intron 3 of 6)	4	25084690	25168342	83653	2	334474	NM_001042744	68839	ENSDARG00000045513	taf3	TAF3 RNA polymerase II, TATA box binding protein (TBP)-associated facto
chr25	32135421	32135694	274	*	3.71	3.27	4.32	-1.05	0.0132	0.0455	Distal Intergenic	25	32273127	32292494	19368	2	494096	NM_001008639	156800	NA	zgc:101540	zgc:101540
chr9	36959656	36959776	121	*	3.18	2.32	4.1	-1.78	0.0132	0.0455	Distal Intergenic	9	36967295	36974877	7583	1	30275	NM_131068	-7519	ENSDARG00000040777	inhbb	inhibin subunit beta B
chr20	6131051	6131206	156	*	2.5	2.84	1.37	1.48	0.0132	0.0455	Promoter (<=1kb)	20	6089440	6131627	42188	2	567494	NM_001102570	421	ENSDARG00000061040	pum2	pumilio RNA-binding family member 2
chr18_KZ115586v1_alt	104787	104917	131	*	1.37	0.63	2.23	-1.6	0.0132	0.0455	Distal Intergenic	768	203909	255527	51619	2	541377	NM_001013504	150610	ENSDARG00000098984	pid1	phosphotyrosine interaction domain containing 1
chr20	34076025	34076219	195	*	1.53	0.7	2.44	-1.74	0.0132	0.0455	Distal Intergenic	20	34039281	34069938	30658	2	558883	NM_001030123	-6087	ENSDARG00000016630	tprb	translocated promoter region b, nuclear basket protein
chr11	42711601	42711773	173	*	2.02	2.39	0.71	1.69	0.0132	0.0455	Intron (NM_001328553/171474, intron 9 of 12)	11	42641469	42719359	77891	1	171474	NM_001328553	70132	ENSDARG00000098359	il17rd	interleukin 17 receptor D
chr19	926561	926680	120	*	3.14	2.6	3.84	-1.24	0.0132	0.0455	Distal Intergenic	19	949464	978005	28542	2	393385	NM_200413	51325	ENSDARG00000102381	slc44a4	solute carrier family 44 member 4
chr12	32641250	32641493	244	*	2.63	2	3.4	-1.4	0.0132	0.0455	Distal Intergenic	12	32423376	32426685	3310	2	557817	NM_001328040	-214565	ENSDARG00000053525	enpp7.2	ectonucleotide pyrophosphatase/phosphodiesterase 7, tandem duplicate 2
chr16	50019954	50020398	445	*	3.45	2.85	4.19	-1.34	0.0132	0.0455	Intron (NM_001003494/445100, intron 2 of 5)	16	50007000	50076303	69304	1	445100	NM_001003494	12954	ENSDARG00000034670	ube2e2	ubiquitin-conjugating enzyme E2E 2
chr2	45618505	45618675	171	*	2.44	1.7	3.29	-1.59	0.0132	0.0455	Distal Intergenic	2	45655294	45663908	8615	2	406810	NM_213489	45233	ENSDARG00000053101	prpf38b	pre-mRNA processing factor 38B
chr6	20739372	20739552	181	*	2.38	1.76	3.15	-1.39	0.0132	0.0455	Distal Intergenic	6	20469171	20627763	158593	2	100038772	NM_001089552	-111609	NA	zgc:162999	zgc:162999
chr12	37520386	37520683	298	*	2.43	1.78	3.23	-1.45	0.0132	0.0455	Distal Intergenic	12	37275333	37299671	24339	2	678607	NM_001040355	-220715	ENSDARG00000060457	pmp22b	peripheral myelin protein 22b
chr7	32914016	32914135	120	*	1.9	1.07	2.82	-1.75	0.0132	0.0455	Distal Intergenic	7	32897739	32899839	2101	1	559769	NM_001045848	16277	ENSDARG00000036144	tssc4	tumor suppressing subtransferable candidate 4
chr21	42041656	42041777	122	*	1.12	0.2	2.08	-1.89	0.0132	0.0455	Distal Intergenic	21	41903462	42007482	104021	2	553402	NM_001256250	-34174	ENSDARG00000053665	gabrg2	gamma-aminobutyric acid (GABA) A receptor, gamma 2
chr15	6735198	6735373	176	*	1.07	0.27	1.96	-1.69	0.0132	0.0455	Distal Intergenic	15	6786822	6807963	21142	1	322309	NM_199596	-51449	ENSDARG00000011488	sirt2	sirtuin 2 (silent mating type information regulation 2, homolog) 2 (S. cerevisiae)
chr10	31069879	31070016	138	*	1.53	0.75	2.41	-1.67	0.0132	0.0455	Intron (NM_153654/386959, intron 2 of 10)	10	31020562	31175744	155183	2	386959	NM_153654	105728	ENSDARG00000055349	pknox2	pbx/knotted 1 homeobox 2
chr12	41121700	41121905	206	*	1.64	0.96	2.45	-1.49	0.0132	0.0455	Distal Intergenic	12	41582640	41618831	36192	2	553411	NM_001020516	496926	ENSDARG00000103490	dpysl4	dihydropyrimidinase like 4
chr7	46345141	46345261	121	*	2.47	1.85	3.24	-1.38	0.0132	0.0455	Distal Intergenic	7	46020070	46029879	9810	1	30188	NM_130995	325071	ENSDARG00000098622	ccne1	cyclin E1
chr5	48183313	48183732	420	*	4.7	4.14	5.41	-1.27	0.0132	0.0455	3' UTR	5	48183370	48260145	76776	2	798771	NM_001130962	76413	ENSDARG00000009418	mef2cb	myocyte enhancer factor 2cb
chr9	55870994	55871368	375	*	3.63	3.95	2.6	1.36	0.0132	0.0455	Exon (NM_001017557/550129, exon 9 of 10)	9	55857193	55875077	17885	1	550129	NM_001017557	13801	ENSDARG00000099236	2021-09-10	septin 10
chr14	28168815	28169092	278	*	3.36	3.69	2.32	1.37	0.0132	0.0455	Distal Intergenic	14	27998756	28052650	53895	2	393541	NM_001348480	-116165	ENSDARG00000033501	tsc22d3	TSC22 domain family, member 3
chr15	37075461	37075733	273	*	1.73	0.92	2.63	-1.71	0.0132	0.0455	Distal Intergenic	15	36941491	37017331	75841	1	557315	NM_001099344	133970	ENSDARG00000104665	kirrel3l	kirre like nephrin family adhesion molecule 3, like
chr10	22845960	22846102	143	*	3.5	3.84	2.44	1.4	0.0132	0.0455	Promoter (<=1kb)	10	22838381	22845484	7104	2	336281	NM_200005	-476	ENSDARG00000056877	vamp2	vesicle-associated membrane protein 2
chr3	39137976	39138100	125	*	1.81	1.11	2.62	-1.51	0.0132	0.0455	Distal Intergenic	3	39099769	39110227	10459	1	569392	NM_001080195	38207	ENSDARG00000059743	tmem98	transmembrane protein 98
chr5	14912417	14912711	295	*	2.56	1.99	3.28	-1.29	0.0132	0.0455	Distal Intergenic	5	15203421	15215478	12058	1	368206	NM_183339	-290710	ENSDARG00000031891	tbx1	T-box transcription factor 1
chr17	47730875	47731028	154	*	2.67	2.05	3.43	-1.38	0.0132	0.0455	Distal Intergenic	17	48126994	48157177	30184	1	541413	NM_001013540	-395966	ENSDARG00000070447	slc39a9	solute carrier family 39 member 9
chr11	852064	852259	196	*	1.38	0.62	2.24	-1.62	0.0132	0.0455	Distal Intergenic	11	807153	811109	3957	1	406560	NM_213275	44911	ENSDARG00000103730	vgll4b	vestigial-like family member 4b
chr2	59137054	59137351	298	*	2.28	1.7	3	-1.3	0.0132	0.0455	Distal Intergenic	2	59102169	59102252	84	2	100033559	NR_030000	-34802	ENSDARG00000081313	mir9-7	microRNA 9-7
chr2	11677197	11677414	218	*	1.89	1.15	2.74	-1.59	0.0132	0.0455	Distal Intergenic	2	11651177	11662903	11727	2	553588	NM_001020566	-14294	ENSDARG00000039203	zgc:110130	zgc:110130
chr24	26857955	26858540	586	*	3.96	4.27	3.02	1.25	0.0132	0.0455	Distal Intergenic	24	26895821	26902679	6859	1	777713	NM_001077761	-37281	ENSDARG00000062087	nceh1b.1	neutral cholesterol ester hydrolase 1b, tandem duplicate 1
chr16	52435525	52435861	337	*	2.15	1.51	2.92	-1.41	0.0132	0.0455	Distal Intergenic	16	52512025	52516923	4899	1	171481	NM_152960	-76164	ENSDARG00000038439	fabp10a	fatty acid binding protein 10a, liver basic
chr17	25481466	25481648	183	*	2.04	1.24	2.92	-1.67	0.0132	0.0455	Distal Intergenic	17	25444424	25480374	35951	1	368255	NM_201486	37042	ENSDARG00000022995	clic4	chloride intracellular channel 4
chr10	5500023	5500482	460	*	4.26	4.52	3.53	0.99	0.0132	0.0455	Distal Intergenic	10	5422545	5475977	53433	1	445182	NM_001003576	77478	ENSDARG00000042975	auh	AU RNA binding protein/enoyl-CoA hydratase
chr10	41760242	41760525	284	*	2.91	3.24	1.87	1.37	0.0132	0.0455	Distal Intergenic	10	41765944	41817114	51171	1	568879	NM_001110035	-5419	ENSDARG00000054036	rnf34b	ring finger protein 34b
chr22	12462640	12462824	185	*	0.71	-0.32	1.72	-2.05	0.0132	0.0455	Distal Intergenic	22	12431617	12447113	15497	1	80963	NM_199522	31023	ENSDARG00000076799	rnd3a	Rho family GTPase 3a
chr1	26278894	26279021	128	*	2.31	1.67	3.09	-1.41	0.0132	0.0455	Distal Intergenic	1	26391755	26398274	6520	2	402961	NM_205662	119253	ENSDARG00000009685	ppa2	inorganic pyrophosphatase 2
chr2	9704867	9705088	222	*	2.13	1.42	2.96	-1.54	0.0132	0.0455	Exon (NM_131757/80972, exon 14 of 15)	2	9702055	9744083	42029	2	80972	NM_131757	38995	ENSDARG00000015707	dvl3a	dishevelled segment polarity protein 3a
chr4	3418174	3418407	234	*	2.5	2.88	1.19	1.69	0.0132	0.0455	Distal Intergenic	4	3455699	3475374	19676	1	393408	NM_200436	-37292	ENSDARG00000039843	znf800b	zinc finger protein 800b
chr15	36463980	36464143	164	*	1.24	0.52	2.08	-1.57	0.0132	0.0455	Distal Intergenic	15	36228894	36248142	19249	2	100333936	NM_001326409	-215838	ENSDARG00000054055	ostn	osteocrin
chr16	29812049	29812168	120	*	1.56	0.89	2.36	-1.47	0.0132	0.0455	Distal Intergenic	16	29698565	29713789	15225	2	393345	NM_200374	-98260	ENSDARG00000046148	tnfaip8l2b	tumor necrosis factor, alpha-induced protein 8-like 2b
chr16	23431608	23431719	112	*	3.23	3.57	2.13	1.44	0.0132	0.0455	Promoter (<=1kb)	16	23431180	23432552	1373	1	336655	NM_212761	428	ENSDARG00000009978	icn	ictacalcin
chr3	34724793	34725257	465	*	4.99	5.23	4.36	0.87	0.0132	0.0455	5' UTR	3	34697284	34753521	56238	2	30670	NM_131396	28264	ENSDARG00000000151	thraa	thyroid hormone receptor alpha a
chr20	19474813	19475050	238	*	3.03	2.33	3.85	-1.52	0.0132	0.0455	Intron (NM_001045157/568263, intron 4 of 14)	20	19436434	19511016	74583	2	568263	NM_001045157	35966	ENSDARG00000091418	snx17	sorting nexin 17
chr6	52507027	52507398	372	*	2.24	1.56	3.05	-1.49	0.0132	0.0455	Distal Intergenic	6	52467779	52484566	16788	2	570133	NM_001326537	-22461	ENSDARG00000075296	fam83c	family with sequence similarity 83 member C
chr19	8883040	8883286	247	*	2.79	3.14	1.61	1.53	0.0132	0.0455	Promoter (2-3kb)	19	8816657	8880675	64019	2	57922	NM_131494	-2365	ENSDARG00000034668	celf3a	cugbp, Elav-like family member 3a
chr25	35244051	35244342	292	*	2.11	1.45	2.91	-1.47	0.0132	0.0456	Distal Intergenic	25	35250976	35271284	20309	1	494492	NM_001009982	-6634	ENSDARG00000001127	slc17a6a	solute carrier family 17 member 6a
chr4	19662022	19662245	224	*	1.48	0.67	2.37	-1.7	0.0132	0.0456	Intron (NM_182865/324404, intron 9 of 23)	4	19396945	19694156	297212	2	324404	NM_182865	31911	ENSDARG00000006766	snd1	staphylococcal nuclease and tudor domain containing 1
chr14	43887710	43887966	257	*	2.63	3.03	1.13	1.9	0.0132	0.0456	Distal Intergenic	14	43605057	43616572	11516	2	393950	NM_200975	-271138	ENSDARG00000076526	gar1	GAR1 homolog, ribonucleoprotein
chr10	18832577	18832708	132	*	2.89	2.4	3.55	-1.15	0.0132	0.0456	Distal Intergenic	10	18877353	18907238	29886	1	327263	NM_001309438	-44645	ENSDARG00000006624	ppp2r2ab	protein phosphatase 2, regulatory subunit B, alpha b
chr20	51348796	51348952	157	*	1.5	0.65	2.43	-1.78	0.0132	0.0456	Distal Intergenic	20	51312883	51334529	21647	1	100006371	NM_001103144	35913	ENSDARG00000060034	tmem151ba	transmembrane protein 151Ba
chr6	10228836	10229086	251	*	2.47	2.86	1.04	1.82	0.0132	0.0456	Distal Intergenic	6	10248332	10305971	57640	2	559447	NM_001044895	76885	ENSDARG00000062744	scn1lab	sodium channel, voltage-gated, type I like, alpha b
chr2	18611181	18611413	233	*	1.85	1.12	2.69	-1.57	0.0132	0.0456	Distal Intergenic	2	18703125	18830722	127598	2	58138	NM_131615	219309	ENSDARG00000100494	pbx1a	pre-B-cell leukemia homeobox 1a
chr18	2716662	2716870	209	*	2.38	1.81	3.11	-1.3	0.0132	0.0456	Distal Intergenic	18	2603628	2668659	65032	2	404605	NM_207073	-48003	ENSDARG00000099724	relt	RELT TNF receptor
chr20	48179432	48179871	440	*	3.64	3.97	2.58	1.4	0.0132	0.0456	Distal Intergenic	20	48141998	48157595	15598	2	393942	NM_200967	-21837	ENSDARG00000009743	efhc1	EF-hand domain (C-terminal) containing 1
chr21	36804977	36805264	288	*	3.88	4.2	2.92	1.28	0.0132	0.0456	Distal Intergenic	21	36612439	36619599	7161	2	436807	NM_001002534	-185378	ENSDARG00000044402	nop16	NOP16 nucleolar protein homolog (yeast)
chr23	3926183	3926361	179	*	2.42	2.78	1.22	1.55	0.0132	0.0456	Distal Intergenic	23	3951652	4019699	68048	2	494043	NM_001008586	93338	ENSDARG00000020699	slc9a8	solute carrier family 9 member 8
chr7_KZ115239v1_alt	246620	246742	123	*	6.26	6.01	6.65	-0.64	0.0132	0.0456	Distal Intergenic	342	225309	238752	13444	1	555721	NM_001146014	21311	ENSDARG00000074319	sall1a	spalt-like transcription factor 1a
chr20	39286383	39286670	288	*	2.16	1.53	2.93	-1.4	0.0132	0.0456	Distal Intergenic	20	39260608	39271843	11236	2	393775	NM_200802	-14540	ENSDARG00000010434	clu	clusterin
chr12	37565919	37566164	246	*	2.94	2.28	3.74	-1.46	0.0132	0.0456	Distal Intergenic	12	37275333	37299671	24339	2	678607	NM_001040355	-266248	ENSDARG00000060457	pmp22b	peripheral myelin protein 22b
chr2	21089969	21090561	593	*	4.83	5.08	4.13	0.95	0.0132	0.0456	Distal Intergenic	2	21063746	21076570	12825	1	406268	NM_212995	26223	ENSDARG00000016399	riok1	RIO kinase 1 (yeast)
chr2	29690638	29690792	155	*	2.21	1.51	3.04	-1.53	0.0132	0.0456	Exon (NM_001202455/569898, exon 9 of 10)	2	29610120	29692825	82706	1	569898	NM_001202455	80518	ENSDARG00000014280	dlgap1a	discs, large (Drosophila) homolog-associated protein 1a
chr19	10266043	10266216	174	*	2.25	2.68	0.58	2.1	0.0132	0.0456	Exon (NM_199840/327627, exon 14 of 18)	19	10255465	10295168	39704	2	327627	NM_199840	28952	ENSDARG00000019842	cnot3b	CCR4-NOT transcription complex, subunit 3b
chr10	32279182	32280020	839	*	4.54	4.82	3.71	1.11	0.0132	0.0456	Intron (NM_201069/394044, intron 14 of 14)	10	32264858	32494304	229447	2	394044	NM_201069	214284	ENSDARG00000023815	uvrag	UV radiation resistance associated gene
chr8	53899242	53899494	253	*	2.96	3.35	1.56	1.79	0.0132	0.0456	Intron (NM_001079678/560887, intron 1 of 15)	8	53862475	53915958	53484	2	560887	NM_001079678	16464	ENSDARG00000103609	mib2	mindbomb E3 ubiquitin protein ligase 2
chr23	20143114	20143401	288	*	5.65	5.85	5.13	0.73	0.0132	0.0456	Distal Intergenic	23	20127883	20133982	6100	2	450033	NM_001006054	-9132	ENSDARG00000006174	lrrc23	leucine rich repeat containing 23
chr11	33038807	33038948	142	*	1.2	0.4	2.09	-1.7	0.0132	0.0456	Distal Intergenic	11	32577554	32722361	144808	2	561336	NM_001160822	-316446	ENSDARG00000027041	pcdh17	protocadherin 17
chr10	17107000	17107119	120	*	2.29	1.64	3.07	-1.43	0.0132	0.0456	Distal Intergenic	10	17077435	17083180	5746	2	100009651	NM_001083020	-23820	ENSDARG00000100292	fam166b	family with sequence similarity 166 member B
chr5	42827112	42827328	217	*	3.26	3.58	2.25	1.33	0.0132	0.0456	Distal Intergenic	5	42834042	42872712	38671	2	245698	NM_213075	45384	ENSDARG00000004830	flot2a	flotillin 2a
chr16	24795352	24795687	336	*	3.96	3.19	4.83	-1.65	0.0132	0.0456	Distal Intergenic	16	24881122	24881218	97	1	100033542	NR_029985	-85435	ENSDARG00000082825	mirlet7d-1	microRNA let7d-1
chr9	54276975	54277098	124	*	2.68	3.06	1.36	1.71	0.0132	0.0456	Distal Intergenic	9	54290896	54292162	1267	1	30534	NM_131278	-13798	ENSDARG00000006206	pou4f3	POU class 4 homeobox 3
chr9	1433583	1433902	320	*	3.72	4.09	2.49	1.6	0.0132	0.0456	Intron (NM_001127405/100004342, intron 2 of 22)	9	1391535	1459985	68451	2	100004342	NM_001127405	26083	ENSDARG00000063730	osbpl6	oxysterol binding protein-like 6
chr10	17209665	17209822	158	*	2.4	1.72	3.2	-1.48	0.0132	0.0456	Distal Intergenic	10	17223686	17232372	8687	2	780839	NM_001079660	22550	ENSDARG00000014058	rab36	RAB36, member RAS oncogene family
chr17	21699891	21700138	248	*	2.06	1.48	2.8	-1.32	0.0132	0.0456	Distal Intergenic	17	21782502	21784237	1736	2	555632	NM_001115098	84099	ENSDARG00000070954	hmx2	H6 family homeobox 2
chr6	21578651	21578770	120	*	1.89	1.1	2.77	-1.67	0.0132	0.0456	Exon (NM_001326600/795882, exon 5 of 7)	6	21576164	21582444	6281	2	795882	NM_001326600	3674	ENSDARG00000052428	si:dkey-43k4.3	si:dkey-43k4.3
chr22	10529574	10529845	272	*	3.83	4.15	2.89	1.26	0.0132	0.0456	Exon (NM_001014324/541511, exon 5 of 13)	22	10516334	10539167	22834	2	541511	NM_001014324	9322	ENSDARG00000003446	ippk	inositol 1,3,4,5,6-pentakisphosphate 2-kinase
chrUn_KN150589v1	2186	2654	469	*	4.34	4.62	3.57	1.04	0.0132	0.0456	Downstream (<1kb)	1711	3131	5808	2678	2	327274	NM_199778	3154	ENSDARG00000100185	elovl7b	ELOVL fatty acid elongase 7b
chr16	48505841	48506215	375	*	2.33	1.73	3.07	-1.34	0.0132	0.0456	Intron (NM_001012368/497279, intron 1 of 10)	16	48460873	48573130	112258	1	497279	NM_001012368	44968	ENSDARG00000103155	ext1a	exostosin glycosyltransferase 1a
chr1	5305002	5305214	213	*	1.88	1.15	2.73	-1.57	0.0132	0.0456	Distal Intergenic	1	5275811	5277579	1769	1	335098	NM_001003842	29191	ENSDARG00000078308	spry2	sprouty RTK signaling antagonist 2
chr18	47134833	47135136	304	*	4.05	3.31	4.89	-1.58	0.0132	0.0456	Distal Intergenic	18	47301165	47306847	5683	1	334784	NM_199925	-166029	ENSDARG00000020841	rbm7	RNA binding motif protein 7
chr9	43886628	43887135	508	*	3.93	4.23	3.04	1.19	0.0132	0.0456	Distal Intergenic	9	43797902	43880341	82440	1	321689	NM_200921	88726	ENSDARG00000012244	ube2e3	ubiquitin-conjugating enzyme E2E 3 (UBC4/5 homolog, yeast)
chr7	73020579	73021020	442	*	4.27	4.59	3.27	1.32	0.0132	0.0456	Distal Intergenic	7	73263751	73263822	72	2	100033729	NR_034276	242802	ENSDARG00000080961	mir31	microRNA 31
chr2	3240324	3240458	135	*	2.09	1.42	2.9	-1.48	0.0132	0.0456	Intron (NM_001045363/751644, intron 1 of 4)	2	3201350	3271007	69658	1	751644	NM_001045363	38974	ENSDARG00000063437	wnt9a	wingless-type MMTV integration site family, member 9A
chr3	10109878	10109997	120	*	1.35	0.61	2.19	-1.58	0.0132	0.0456	Distal Intergenic	3	10152133	10164754	12622	1	327291	NM_194373	-42136	ENSDARG00000044938	cbx2	chromobox homolog 2 (Drosophila Pc class)
chr24	30892986	30893382	397	*	3.28	3.59	2.35	1.24	0.0132	0.0456	Distal Intergenic	24	30834160	30862177	28018	2	541437	NM_001328429	-30809	ENSDARG00000101947	ptbp2a	polypyrimidine tract binding protein 2a
chr9	10888499	10888717	219	*	2.58	2.92	1.5	1.43	0.0132	0.0456	Distal Intergenic	9	10936768	10938468	1701	1	101883500	NR_138562	-48051	ENSDARG00000095306	si:dkey-22p6.2	si:dkey-22p6.2
chr19	2984076	2984602	527	*	3	2.54	3.63	-1.09	0.0132	0.0456	Intron (NM_001077735/777627, intron 3 of 15)	19	2930373	3056048	125676	2	777627	NM_001077735	71446	ENSDARG00000063627	bop1	BOP1 ribosomal biogenesis factor
chr24	41655249	41655475	227	*	3.95	4.27	2.98	1.29	0.0132	0.0456	Promoter (1-2kb)	24	41516339	41656851	140513	2	386769	NM_001018133	1376	NA	ptprma	protein tyrosine phosphatase receptor type Ma
chr21	25541713	25541868	156	*	1.82	1.11	2.64	-1.53	0.0132	0.0456	Distal Intergenic	21	25588437	25601648	13212	2	572703	NM_001160358	59780	ENSDARG00000020811	efemp2b	EGF containing fibulin extracellular matrix protein 2b
chr19	38656562	38656773	212	*	3.4	3.72	2.38	1.34	0.0132	0.0456	Distal Intergenic	19	38422059	38467664	45606	1	321212	NM_212579	234503	ENSDARG00000024492	col9a2	procollagen, type IX, alpha 2
chr7	32887726	32888051	326	*	4.28	4.58	3.39	1.19	0.0132	0.0457	Intron (NM_001079983/560102, intron 1 of 18)	7	32835503	32895603	60101	2	560102	NM_001079983	7552	ENSDARG00000036147	ano5b	anoctamin 5b
chr9	37198031	37198523	493	*	4.77	5.06	3.92	1.14	0.0132	0.0457	Intron (NM_130967/30154, intron 2 of 13)	9	37141836	37296906	155071	1	30154	NM_130967	56195	ENSDARG00000025641	gli2a	GLI family zinc finger 2a
chr17	33611645	33611758	114	*	0.94	0.1	1.85	-1.75	0.0132	0.0457	Distal Intergenic	17	33708689	33713755	5067	2	445048	NM_001003442	101997	ENSDARG00000034042	dnal1	dynein, axonemal, light chain 1
chr21	23352385	23352535	151	*	1.98	1.26	2.81	-1.55	0.0132	0.0457	Intron (NM_131202/30447, intron 16 of 17)	21	23338059	23746928	408870	2	30447	NM_131202	394393	ENSDARG00000056181	ncam1a	neural cell adhesion molecule 1a
chr12	38868038	38868163	126	*	0.73	-0.21	1.7	-1.91	0.0132	0.0457	Distal Intergenic	12	38807645	38854965	47321	1	100151075	NM_001099246	60393	ENSDARG00000074041	abca5	ATP-binding cassette, sub-family A (ABC1), member 5
chr5	18725963	18726546	584	*	4.27	4.55	3.43	1.12	0.0132	0.0457	Distal Intergenic	5	18827316	18897482	70167	2	393984	NM_201009	170936	ENSDARG00000012468	aacs	acetoacetyl-CoA synthetase
chr16	27216823	27217020	198	*	1.53	0.78	2.39	-1.61	0.0132	0.0457	Exon (NM_001104936/403068, exon 3 of 3)	16	27215938	27224074	8137	2	403068	NM_001104936	7054	ENSDARG00000070399	alg2	ALG2 alpha-1,3/1,6-mannosyltransferase
chr17	30939564	30939754	191	*	1.91	1.27	2.68	-1.41	0.0132	0.0457	Exon (NM_199519/58003, exon 2 of 13)	17	30900495	30976007	75513	2	58003	NM_199519	36253	ENSDARG00000035650	evla	Enah/Vasp-like a
chr13	33568377	33568641	265	*	1.86	1.11	2.71	-1.6	0.0132	0.0457	Distal Intergenic	13	33606701	33609433	2733	1	406738	NM_213639	-38060	ENSDARG00000012972	cfl1l	cofilin 1 (non-muscle), like
chr6	14687584	14687782	199	*	2.23	2.59	0.99	1.6	0.0132	0.0457	Distal Intergenic	6	14949950	14953354	3405	1	30321	NM_131102	-262168	ENSDARG00000095896	pou3f3b	POU class 3 homeobox 3b
chr12	48634812	48635345	534	*	4.64	4.91	3.86	1.05	0.0132	0.0457	Promoter (<=1kb)	12	48634927	48656276	21350	1	100006671	NM_001100101	0	ENSDARG00000104713	zgc:165653	zgc:165653
chr13	28537083	28537202	120	*	2.59	1.81	3.47	-1.67	0.0132	0.0457	Intron (NM_131521/58035, intron 5 of 8)	13	28512877	28561512	48636	1	58035	NM_131521	24206	ENSDARG00000033551	fbxw4	F-box and WD repeat domain containing 4
chr1	41478728	41479106	379	*	2.84	2.05	3.73	-1.68	0.0132	0.0457	Distal Intergenic	1	41465771	41471621	5851	1	393739	NM_200766	12957	ENSDARG00000008706	paip2b	poly(A) binding protein interacting protein 2B
chr25	1963951	1964362	412	*	2.86	2.23	3.63	-1.39	0.0132	0.0457	Distal Intergenic	25	1732838	1808080	75243	1	30240	NM_131042	231113	ENSDARG00000103311	fbln1	fibulin 1
chr6	38795918	38796230	313	*	3.4	2.72	4.22	-1.5	0.0132	0.0457	Distal Intergenic	6	38773406	38790063	16658	1	792398	NM_001007318	22512	ENSDARG00000055737	ube3a	ubiquitin protein ligase E3A
chr21	12408170	12408294	125	*	3.43	2.98	4.04	-1.06	0.0132	0.0457	Distal Intergenic	21	12079895	12272543	192649	2	436835	NM_001002562	-135627	ENSDARG00000070045	celf4	CUGBP, Elav-like family member 4
chr20	41957414	41957809	396	*	2.35	1.82	3.05	-1.23	0.0132	0.0457	Distal Intergenic	20	41910845	41926494	15650	2	555548	NM_001201561	-30920	ENSDARG00000069404	pln	phospholamban
chr14	49502408	49502528	121	*	2.14	1.53	2.91	-1.38	0.0132	0.0457	Distal Intergenic	14	49462855	49490736	27882	1	550479	NM_001362568	39553	ENSDARG00000023988	dctn4	dynactin 4
chr7	51576075	51576392	318	*	3.8	3.19	4.56	-1.37	0.0132	0.0457	Distal Intergenic	7	51633816	51639640	5825	2	449547	NM_001005589	63248	ENSDARG00000014690	rps4x	ribosomal protein S4 X-linked
chr17	35688524	35688708	185	*	3.79	3.11	4.6	-1.49	0.0131	0.0452	Distal Intergenic	17	35878547	35881807	3261	2	30602	NM_131336	193099	ENSDARG00000077811	sox11a	SRY-box transcription factor 11a
chr23	44606027	44606508	482	*	4.09	4.41	3.14	1.27	0.0131	0.0452	Distal Intergenic	23	44611857	44623771	11915	1	378963	NM_214723	-5349	ENSDARG00000039007	eno3	enolase 3, (beta, muscle)
chr21	9591307	9591427	121	*	1.13	0.14	2.13	-1.98	0.0131	0.0452	Intron (NM_001037701/569698, intron 1 of 14)	21	9576181	9713281	137101	1	569698	NM_001037701	15126	ENSDARG00000102730	mapk10	mitogen-activated protein kinase 10
chr16	1960476	1960603	128	*	5.15	4.81	5.66	-0.85	0.0131	0.0452	Distal Intergenic	16	1470418	1503023	32606	2	260351	NM_178222	-457453	ENSDARG00000023316	sim1a	SIM bHLH transcription factor 1a
chr23	26481746	26481996	251	*	4.03	3.22	4.92	-1.7	0.0131	0.0452	Intron (NM_001365193/561689, intron 1 of 20)	23	26230769	26489412	258644	2	561689	NM_001365193	7416	ENSDARG00000101869	magi3a	membrane associated guanylate kinase, WW and PDZ domain containing 3a
chr4	6893097	6893349	253	*	1.73	1.11	2.5	-1.39	0.0131	0.0452	Intron (NM_001166228/654774, intron 7 of 51)	4	6869847	6990324	120478	1	654774	NM_001166228	23250	ENSDARG00000024874	dock4b	dedicator of cytokinesis 4b
chr21	6247735	6247996	262	*	1.62	2.03	0.09	1.94	0.0131	0.0452	Distal Intergenic	21	6137030	6150564	13535	1	321602	NM_212591	110705	ENSDARG00000044811	cdk9	cyclin-dependent kinase 9 (CDC2-related kinase)
chr3	16056255	16056468	214	*	3.62	3.93	2.65	1.28	0.0131	0.0452	Promoter (<=1kb)	3	16044678	16055463	10786	2	192336	NM_001105136	-792	ENSDARG00000057853	atp6v0ca	ATPase H+ transporting V0 subunit ca
chr7	53641393	53641872	480	*	3.05	2.61	3.67	-1.06	0.0131	0.0452	Exon (NM_201219/394199, exon 10 of 10)	7	53641257	53669653	28397	2	394199	NM_201219	27781	ENSDARG00000101702	chrna7	cholinergic receptor, nicotinic, alpha 7 (neuronal)
chr15	29022001	29022204	204	*	2.08	1.45	2.85	-1.4	0.0131	0.0452	Promoter (2-3kb)	15	29024922	29071870	46949	1	777613	NM_001328091	-2718	ENSDARG00000068926	si:ch211-137a8.2	si:ch211-137a8.2
chr13	18215467	18215625	159	*	1.14	1.58	-0.66	2.24	0.0131	0.0452	Distal Intergenic	13	18127662	18174864	47203	2	567204	NM_001303262	-40603	ENSDARG00000057273	alox5a	arachidonate 5-lipoxygenase a
chr20	28750552	28750674	123	*	2.6	1.78	3.49	-1.71	0.0131	0.0452	Intron (NM_001281792/562521, intron 1 of 20)	20	28649892	28768057	118166	2	562521	NM_001281792	17383	ENSDARG00000020134	sipa1l1	signal-induced proliferation-associated 1 like 1
chr12	12729011	12729174	164	*	1.64	0.85	2.52	-1.67	0.0131	0.0452	Distal Intergenic	12	13118621	13164249	45629	1	30208	NM_131014	-389447	ENSDARG00000055527	cmn	calymmin
chr23	39898295	39898783	489	*	2.9	2.32	3.63	-1.31	0.0131	0.0452	Distal Intergenic	23	39811457	39849155	37699	2	568055	NM_001029963	-49140	ENSDARG00000077341	ppp1r14c	protein phosphatase 1, regulatory (inhibitor) subunit 14C
chr12	24123135	24123302	168	*	1.37	0.61	2.24	-1.64	0.0131	0.0452	Distal Intergenic	12	24060982	24077141	16160	1	334210	NM_199874	62153	ENSDARG00000005246	asb3	ankyrin repeat and SOCS box containing 3
chr23	43923210	43923419	210	*	2.44	2.79	1.3	1.5	0.0131	0.0452	Distal Intergenic	23	43770149	43787683	17535	1	792211	NM_001017554	153061	ENSDARG00000009524	rnf150b	ring finger protein 150b
chr5	66220470	66220784	315	*	4.3	4.58	3.47	1.11	0.0131	0.0452	Promoter (<=1kb)	5	66220601	66236684	16084	1	550360	NM_001017667	0	ENSDARG00000086786	mfsd10	major facilitator superfamily domain containing 10
chr19	37731439	37732026	588	*	4.79	5.09	3.87	1.22	0.0131	0.0452	Intron (NM_001122760/557991, intron 4 of 26)	19	37620342	37842003	221662	1	557991	NM_001122760	111097	ENSDARG00000061479	thsd7aa	thrombospondin, type I, domain containing 7Aa
chr20	4339967	4340095	129	*	1.51	0.7	2.4	-1.7	0.0131	0.0453	Distal Intergenic	20	4221978	4248785	26808	1	767791	NM_001076758	117989	ENSDARG00000099252	ipcef1	interaction protein for cytohesin exchange factors 1
chr10	20643960	20644114	155	*	1.45	1.87	-0.26	2.13	0.0131	0.0453	Distal Intergenic	10	20635971	20639084	3114	2	100006310	NM_001007780	-4876	ENSDARG00000057665	sprn2	shadow of prion protein 2
chr20	29799895	29800189	295	*	3.21	2.73	3.86	-1.13	0.0131	0.0453	Distal Intergenic	20	29784930	29787210	2281	2	321364	NM_199541	-12685	ENSDARG00000029544	id2b	inhibitor of DNA binding 2b
chr15	45405310	45405537	228	*	2.21	2.6	0.8	1.8	0.0131	0.0453	Distal Intergenic	15	45315949	45318785	2837	2	105667211	NM_001308063	-86525	NA	cd80/86	cluster of Differentiation 80/86
chr21	18610686	18611159	474	*	2.92	2.39	3.6	-1.21	0.0131	0.0453	Distal Intergenic	21	18877130	18890892	13763	1	793688	NM_001100052	-265971	ENSDARG00000093234	si:dkey-65l23.2	si:dkey-65l23.2
chr4	5604306	5604439	134	*	1.2	0.42	2.07	-1.65	0.0131	0.0453	Distal Intergenic	4	5587185	5597837	10653	2	558154	NM_001328598	-6469	ENSDARG00000034700	vegfab	vascular endothelial growth factor Ab
chr7	18415095	18416041	947	*	4.4	3.92	5.05	-1.13	0.0131	0.0453	Distal Intergenic	7	18364190	18367273	3084	1	323364	NM_001099228	50905	ENSDARG00000103713	cd248a	CD248 molecule, endosialin a
chr3	31318373	31318621	249	*	4.2	3.47	5.04	-1.57	0.0131	0.0453	Distal Intergenic	3	31250066	31254979	4914	2	100002992	NM_001293671	-63394	ENSDARG00000090900	apnl	actinoporin-like protein
chr16	42618574	42618693	120	*	2.94	2.23	3.77	-1.54	0.0131	0.0453	Distal Intergenic	16	42667560	42683501	15942	1	368327	NM_001002868	-48867	ENSDARG00000069995	dpy19l1l	dpy-19-like 1, like (H. sapiens)
chr22	23901804	23901923	120	*	2.56	1.71	3.48	-1.77	0.0131	0.0453	Distal Intergenic	22	23734001	23748284	14284	2	492777	NM_001007418	-153520	ENSDARG00000103760	cfhl2	complement factor H like 2
chr17	940621	940859	239	*	2.44	1.81	3.21	-1.41	0.0131	0.0453	Exon (NM_001042745/335110, exon 3 of 74)	17	871205	945956	74752	2	335110	NM_001042745	5097	NA	dync1h1	dynein, cytoplasmic 1, heavy chain 1
chr4	64329831	64329959	129	*	2.62	2.02	3.37	-1.35	0.0131	0.0453	Intron (NM_001115109/100141494, intron 1 of 1)	4	64328158	64336324	8167	2	100141494	NM_001115109	6365	ENSDARG00000100652	znf1147	zinc finger protein 1147
chr7	4911018	4911244	227	*	2.08	2.49	0.55	1.94	0.0131	0.0453	Distal Intergenic	7	4931366	4933943	2578	1	100126116	NM_001328077	-20122	ENSDARG00000077260	si:dkey-28d5.13	si:dkey-28d5.13
chr9	52474882	52475046	165	*	3.84	3.09	4.69	-1.6	0.0131	0.0453	Exon (NM_001127466/560412, exon 9 of 19)	9	52442922	52490579	47658	2	560412	NM_001127466	15533	NA	smarcal1	SWI/SNF related, matrix associated, actin dependent regulator of chromatin, subfamily a-like 1
chr22	1955429	1955617	189	*	2.8	3.15	1.69	1.46	0.0131	0.0453	Distal Intergenic	22	1911335	1919598	8264	1	571761	NM_001104945	44094	ENSDARG00000098800	znf1156	zinc finger protein 1156
chr21	11652349	11652473	125	*	1.23	0.4	2.14	-1.74	0.0131	0.0453	Promoter (1-2kb)	21	11567031	11654462	87432	2	563084	NM_001130591	1989	ENSDARG00000058693	cast	calpastatin
chr12	39923300	39923561	262	*	1.82	1.17	2.61	-1.44	0.0131	0.0453	Distal Intergenic	12	38807645	38854965	47321	1	100151075	NM_001099246	1115655	ENSDARG00000074041	abca5	ATP-binding cassette, sub-family A (ABC1), member 5
chr2	16094565	16094774	210	*	2.02	1.31	2.84	-1.53	0.0131	0.0453	Intron (NM_001126393/559145, intron 10 of 26)	2	15994008	16159203	165196	2	559145	NM_001126393	64429	ENSDARG00000075962	vav3b	vav 3 guanine nucleotide exchange factor b
chr2	33421038	33421325	288	*	2.93	3.25	1.91	1.34	0.0131	0.0453	Downstream (1-2kb)	2	33422417	33454976	32560	2	541495	NM_001326378	33651	ENSDARG00000038793	ccdc24	coiled-coil domain containing 24
chr2	57655406	57655532	127	*	6.62	6.41	6.97	-0.56	0.0131	0.0453	Distal Intergenic	2	57447105	57476462	29358	2	393314	NM_001242942	-178944	ENSDARG00000042215	pias4b	protein inhibitor of activated STAT, 4b
chr11	18619185	18619422	238	*	2.98	3.29	1.99	1.31	0.0131	0.0453	Distal Intergenic	11	18545558	18557277	11720	2	553277	NM_001079955	-61908	ENSDARG00000057940	dido1	death inducer-obliterator 1
chr6	57741303	57741477	175	*	1.64	0.94	2.47	-1.52	0.0131	0.0453	Distal Intergenic	6	57634378	57655030	20653	2	767652	NM_001365483	-86273	ENSDARG00000074337	cbfa2t2	CBFA2/RUNX1 partner transcriptional co-repressor 2
chr2	337975	338281	307	*	2.43	1.76	3.23	-1.47	0.0131	0.0453	Distal Intergenic	2	342631	344588	1958	2	100537295	NR_111927	6307	ENSDARG00000097118	si:dkey-33c14.3	si:dkey-33c14.3
chr8	5468957	5469080	124	*	1.86	1.17	2.68	-1.5	0.0131	0.0453	Distal Intergenic	8	5202589	5220125	17537	2	323563	NM_001012242	-248832	ENSDARG00000025468	bnip3la	BCL2 interacting protein 3 like a
chr5	17612019	17612396	378	*	3.3	2.72	4.03	-1.31	0.0131	0.0453	Distal Intergenic	5	17780475	17813299	32825	1	564271	NM_001100015	-168079	ENSDARG00000075347	chfr	checkpoint with forkhead and ring finger domains, E3 ubiquitin protein ligase
chr10	4086961	4087081	121	*	3.63	2.82	4.52	-1.7	0.0131	0.0453	3' UTR	10	4046376	4087018	40643	1	393894	NM_001328435	40585	ENSDARG00000036005	pitpnb	phosphatidylinositol transfer protein, beta
chr20	18064535	18064806	272	*	2.09	1.44	2.88	-1.43	0.0131	0.0453	Distal Intergenic	20	18163368	18190005	26638	1	445293	NM_001003749	-98562	ENSDARG00000010565	aqp4	aquaporin 4
chr17	11621871	11622128	258	*	2.17	1.52	2.96	-1.44	0.0131	0.0453	Distal Intergenic	17	11500628	11505072	4445	1	558031	NM_001327908	121243	ENSDARG00000074323	efcab2	EF-hand calcium binding domain 2
chr23	33744597	33744812	216	*	3.11	3.42	2.2	1.22	0.0131	0.0453	Exon (NM_001007421/492780, exon 11 of 14)	23	33739215	33753361	14147	2	492780	NM_001007421	8549	ENSDARG00000003219	bin2a	bridging integrator 2a
chr14	31195255	31195600	346	*	3.68	3.98	2.79	1.19	0.0131	0.0453	Intron (NM_001305618/387365, intron 7 of 7)	14	31176951	31466214	289264	2	387365	NM_001305618	270614	ENSDARG00000032199	gpc3	glypican 3
chr5	337692	337830	139	*	2.37	2.72	1.18	1.54	0.0131	0.0453	Promoter (<=1kb)	5	337215	342321	5107	1	406612	NM_214750	477	ENSDARG00000104069	rnf170	ring finger protein 170
chr13	32222686	32223069	384	*	2.79	2.21	3.53	-1.32	0.0131	0.0453	Distal Intergenic	13	32144370	32150443	6074	1	450059	NM_001006079	78316	ENSDARG00000014091	osr1	odd-skipped related transcription factor 1
chr20	32584032	32584236	205	*	2.81	3.14	1.74	1.4	0.0131	0.0453	Distal Intergenic	20	32501763	32520457	18695	1	436861	NM_001002588	82269	ENSDARG00000017740	sec63	SEC63 homolog, protein translocation regulator
chr19	13919076	13919375	300	*	3.33	3.65	2.34	1.31	0.0131	0.0453	5' UTR	19	13905068	13923091	18024	2	415141	NM_001002051	3716	ENSDARG00000098813	stx12	syntaxin 12
chr14	40857336	40857455	120	*	3.11	2.46	3.9	-1.44	0.0131	0.0453	Intron (NM_173260/100002261, intron 3 of 12)	14	40852504	40874077	21574	1	100002261	NM_173260	4832	ENSDARG00000019572	taf7	TAF7 RNA polymerase II, TATA box binding protein (TBP)-associated factor
chr18	2982315	2982434	120	*	2.74	2.08	3.54	-1.47	0.0131	0.0453	Distal Intergenic	18	3038173	3049798	11626	1	336550	NM_201153	-55739	ENSDARG00000103007	rps3	ribosomal protein S3
chr15	18174787	18174969	183	*	1.02	0.08	1.98	-1.89	0.0131	0.0453	Distal Intergenic	15	18157665	18162647	4983	2	494086	NM_001008629	-12140	ENSDARG00000014849	pih1d2	PIH1 domain containing 2
chr17	10698699	10698939	241	*	2.8	2.29	3.47	-1.18	0.0131	0.0453	Distal Intergenic	17	10711641	10738001	26361	2	550278	NM_001017615	39062	ENSDARG00000035546	jmjd7	jumonji domain containing 7
chr11	22164247	22164817	571	*	3.19	2.63	3.9	-1.27	0.0131	0.0453	Distal Intergenic	11	22292280	22312133	19854	2	562289	NM_001257192	147316	ENSDARG00000010794	tfeb	transcription factor EB
chr22	1011983	1012213	231	*	2.28	1.67	3.03	-1.36	0.0131	0.0453	Distal Intergenic	22	1049370	1069407	20038	1	335654	NM_199966	-37157	ENSDARG00000044526	camk1ga	calcium/calmodulin-dependent protein kinase IGa
chr7	32771279	32771398	120	*	1.59	0.82	2.46	-1.63	0.0131	0.0453	Distal Intergenic	7	32815730	32833153	17424	2	100149756	NM_001005398	61755	ENSDARG00000041150	slc17a6b	solute carrier family 17 member 6b
chr17	45519740	45520038	299	*	3.48	2.83	4.26	-1.43	0.0131	0.0453	Distal Intergenic	17	45529857	45552059	22203	2	560304	NM_001319133	32021	ENSDARG00000026335	susd4	sushi domain containing 4
chr17	34138323	34138527	205	*	2.7	3.04	1.62	1.41	0.0131	0.0453	Intron (NM_001177444/555470, intron 12 of 25)	17	33999630	34182538	182909	1	555470	NM_001177444	138693	ENSDARG00000089076	gphna	gephyrin a
chr17	5285041	5285203	163	*	1.4	0.62	2.27	-1.65	0.0131	0.0453	Intron (NM_001002625/436898, intron 3 of 11)	17	5161760	5424175	262416	2	436898	NM_001002625	138972	ENSDARG00000098141	supt3h	SPT3 homolog, SAGA and STAGA complex component
chr9	12367146	12367262	117	*	1.08	0.22	2.01	-1.78	0.0131	0.0453	Distal Intergenic	9	12405121	12424794	19674	2	100002095	NM_001089454	57532	ENSDARG00000061664	zgc:162707	zgc:162707
chr9	34606326	34607029	704	*	3.8	3.36	4.4	-1.05	0.0131	0.0453	Distal Intergenic	9	34641237	34647693	6457	1	664748	NM_001126411	-34208	ENSDARG00000025891	shox	short stature homeobox
chrUn_KN149797v1	47667	47938	272	*	2.16	1.51	2.94	-1.43	0.0131	0.0453	Distal Intergenic	1070	55555	70688	15134	2	795664	NM_001288775	22750	ENSDARG00000103342	wu:fa56d06	wu:fa56d06
chr16	43910680	43911066	387	*	1.94	1.26	2.76	-1.5	0.0131	0.0454	Intron (NM_001039635/568996, intron 5 of 7)	16	43819512	44127387	307876	2	568996	NM_001039635	216321	ENSDARG00000040123	zfpm2a	zinc finger protein, FOG family member 2a
chr8	52029815	52030198	384	*	2.59	2	3.33	-1.33	0.0131	0.0454	Exon (NM_001118893/378837, exon 49 of 73)	8	51992340	52091696	99357	2	378837	NM_001118893	61498	ENSDARG00000039225	vps13a	vacuolar protein sorting 13 homolog A
chr11_KZ115361v1_alt	281943	282109	167	*	1.14	1.58	-0.66	2.23	0.0131	0.0454	Distal Intergenic	496	188431	253487	65057	1	393422	NM_200450	93512	ENSDARG00000005141	camkvb	CaM kinase-like vesicle-associated b
chr25	33883651	33884068	418	*	4.41	4.73	3.39	1.35	0.0131	0.0454	Intron (NM_001110167/564951, intron 1 of 9)	25	33849712	33963212	113501	1	564951	NM_001110167	33939	ENSDARG00000031768	roraa	RAR-related orphan receptor A, paralog a
chr13	33248499	33248741	243	*	3.8	4.16	2.59	1.57	0.0131	0.0454	Promoter (2-3kb)	13	33246203	33251757	5555	1	503714	NM_001013308	2296	ENSDARG00000025549	ndufaf1	NADH:ubiquinone oxidoreductase complex assembly factor 1
chr11	43968969	43969311	343	*	4.26	3.66	5.01	-1.35	0.0131	0.0454	Distal Intergenic	11	44144611	44163164	18554	2	768175	NM_001077318	193853	ENSDARG00000035808	clcn4	chloride channel, voltage-sensitive 4
chr16	51678849	51679049	201	*	1.68	0.99	2.49	-1.5	0.0131	0.0454	Distal Intergenic	16	51736680	51867349	130670	1	100004688	NM_001163294	-57631	NA	col27a1a	collagen, type XXVII, alpha 1a
chr16	21242326	21242614	289	*	4.91	5.18	4.16	1.02	0.0131	0.0454	Distal Intergenic	16	21425154	21441226	16073	1	335722	NM_001001947	-182540	ENSDARG00000040485	gsdmeb	gasdermin Eb
chr7_KZ115235v1_alt	241132	241283	152	*	1.86	2.25	0.43	1.82	0.0131	0.0454	Distal Intergenic	338	260501	276134	15634	1	572649	NM_001017717	-19218	ENSDARG00000036135	bbox1	butyrobetaine (gamma), 2-oxoglutarate dioxygenase (gamma-butyrobetaine hydroxylase) 1
chr20	160888	161067	180	*	2.22	1.56	3.01	-1.45	0.0131	0.0454	Intron (NM_001030209/566552, intron 5 of 6)	20	159307	164300	4994	2	566552	NM_001030209	3233	ENSDARG00000043963	si:ch211-241j12.3	si:ch211-241j12.3
chr6	56877972	56878198	227	*	1.93	1.25	2.74	-1.49	0.0131	0.0454	Distal Intergenic	6	57436314	57476465	40152	2	378844	NM_001002869	598267	ENSDARG00000091831	ddx27	DEAD (Asp-Glu-Ala-Asp) box polypeptide 27
chr13	15838154	15838614	461	*	4.32	3.82	4.99	-1.17	0.0131	0.0454	Exon (NM_200953/393928, exon 2 of 15)	13	15816860	15897720	80861	1	393928	NM_200953	21294	ENSDARG00000009796	klc1a	kinesin light chain 1a
chr13	28184127	28184436	310	*	2.72	3.09	1.41	1.69	0.0131	0.0454	Intron (NM_001077778/777731, intron 4 of 9)	13	28009727	28263856	254130	2	777731	NM_001077778	79420	ENSDARG00000031302	smap1	small ArfGAP 1
chr6	50076823	50077131	309	*	3.52	2.92	4.26	-1.34	0.0131	0.0454	Intron (NM_205610/402903, intron 2 of 9)	6	50022152	50203656	181505	2	402903	NM_205610	126525	ENSDARG00000059972	raly	RALY heterogeneous nuclear ribonucleoprotein
chr25	33773205	33773404	200	*	1.05	0.15	2	-1.85	0.0131	0.0454	Distal Intergenic	25	33849712	33963212	113501	1	564951	NM_001110167	-76308	ENSDARG00000031768	roraa	RAR-related orphan receptor A, paralog a
chr9	54920196	54920553	358	*	2.55	1.98	3.28	-1.3	0.0131	0.0454	Exon (NM_001167899/793646, exon 4 of 9)	9	54892079	54940881	48803	1	793646	NM_001167899	28117	ENSDARG00000075012	glra2	glycine receptor, alpha 2
chr1	58017640	58017966	327	*	2.1	1.38	2.93	-1.54	0.0131	0.0454	Exon (NM_001110522/567859, exon 8 of 12)	1	58014831	58036443	21613	2	567859	NM_001110522	18477	ENSDARG00000058270	si:ch211-114l13.7	si:ch211-114l13.7
chr6	3795033	3795194	162	*	1.56	0.84	2.4	-1.56	0.0131	0.0454	Distal Intergenic	6	3816241	3825930	9690	1	561824	NM_001326452	-21047	ENSDARG00000107534	erich2	glutamate-rich 2
[truncated: 54,957 more rows]

## Sheet: All_Peaks
Chr	start	stop	peakNames	MA4	MA5	MA6	MA7	MA8	MA9	MA10	MA11	MC_Het4	MC_Het5	MC_Het6	MC_Homo
[truncated: 194,102 more rows]
